# Supplementary material for: Overexpression of Lol-miR11467 negatively affects osmotic resistance in Larix kaempferi 3 × L. gmelinii 9
Source: BMC Plant Biol. 2025 May 6;25:592. doi: 10.1186/s12870-025-06591-x (PMC12054245; doi:10.1186/s12870-025-06591-x)
Supplement: Supplementary file 4 — Supplementary Material 4 [file 12870_2025_6591_MOESM4_ESM.xlsx]

## Sheet: Sheet1
Table S1 Target gene amplification primer
Primer	Sequences(5'-3')	Length
Lol-miR11467-F	ATGACCATGATTACGAATTCGTGCTTGATCCCTACAATAAG	41 bp
Lol-miR11467-R	ACGGCCAGTGCCAAGCTTTGAAAATAAATGCATTATCACTTC	42 bp
Sequences marked with red that are homologous to the vector
The precursor sequence of Lol-miR11467	gugcuugaucccuacaauaagcuuuucagcccguucacgguaaaguuuauaauguaacuuugcagagugaguggcuggaaaacuuauugaagugauaaugcauuuauuuuca
