# Supplementary material for: Overexpression of Lol-miR11467 negatively affects osmotic resistance in Larix kaempferi 3 × L. gmelinii 9
Source: BMC Plant Biol. 2025 May 6;25:592. doi: 10.1186/s12870-025-06591-x (PMC12054245; doi:10.1186/s12870-025-06591-x)
Supplement: Supplementary file 5 — Supplementary Material 5 [file 12870_2025_6591_MOESM5_ESM.xlsx]

## Sheet: Sheet1
Table S2 Target gene PCR amplification system
Reagent	Adding amount (μL)
PrimeSTAR Max Premix (2×)	10
P1301+Lol-miR11467-F (10μM)	0.5
P1301+Lol-miR11467-R (10μM)	0.5
cDNA	1 (<200 ng)
ddH2O	8
Total	20
The amplification reaction was as follows: 95℃ for 5 min; 30 cycles of 94℃ for 30 s, 58℃ for 30 s, 72℃ for 1 min/kb; 72℃ for 8 min.
PrimeSTAR Max Premix (2×) was from Takara
