# Supplementary material for: Overexpression of Lol-miR11467 negatively affects osmotic resistance in Larix kaempferi 3 × L. gmelinii 9
Source: BMC Plant Biol. 2025 May 6;25:592. doi: 10.1186/s12870-025-06591-x (PMC12054245; doi:10.1186/s12870-025-06591-x)
Supplement: Supplementary file 6 — Supplementary Material 6 [file 12870_2025_6591_MOESM6_ESM.xlsx]

## Sheet: Sheet1
Table S3 Double digestion reaction system
Reagent	Adding amount
2×Tango buffer	4 μL
EcoR I	1 μL
Hind III	2 μL
Plasmid	1 μg
ddH2O	up to 20 μL
