# Supplementary material for: Overexpression of Lol-miR11467 negatively affects osmotic resistance in Larix kaempferi 3 × L. gmelinii 9
Source: BMC Plant Biol. 2025 May 6;25:592. doi: 10.1186/s12870-025-06591-x (PMC12054245; doi:10.1186/s12870-025-06591-x)
Supplement: Supplementary file 7 — Supplementary Material 7 [file 12870_2025_6591_MOESM7_ESM.xlsx]

## Sheet: Sheet1
Table S4 PCR amplification reaction system
Reagent	Adding amount (μL)
DNA	2
Forward primer (10 μM)	1
Reverse primer (10 μM)	1
Mix	20
EasyTaq® DNA polymerase	1
Total	25
Mix: ddH2O 24μL, 10×Buffer 5μL, 2.5 MMdNTPs 4 μL. 2.5 MMdNTPs was from ThermoFisher Scientific
PCR reaction procedure was as follows: 94°C for 3 min; 30 cycles of 94°C for 30 s, 60°C for 30 s, 72°C for 1 min; 72°C for 7 min
EasyTaq® DNA polymerase was from TransGen Biotech
