# Supplementary material for: Overexpression of Lol-miR11467 negatively affects osmotic resistance in Larix kaempferi 3 × L. gmelinii 9
Source: BMC Plant Biol. 2025 May 6;25:592. doi: 10.1186/s12870-025-06591-x (PMC12054245; doi:10.1186/s12870-025-06591-x)
Supplement: Supplementary file 8 — Supplementary Material 8 [file 12870_2025_6591_MOESM8_ESM.xlsx]

## Sheet: Sheet1
Table S5 The primers used for detection of Lol-miR11467 resistant calli
	Primer	Forward primer (5'-3')	Reverse primer (5'-3')
DNA detection primer	Lol-miR11467-DNA	TGTGTGAGTTAGCTCACTCATTAGGC	TGAAAATAAATGCATTATCACTTC
RNA detection primer	Lol-miR11467-qRT-PCR	TCCCTACAATAAGCTTTTCAGC	CTTCAATAAGTTTTCCAGCCA
Internal reference gene	EF-1	GACTGTACCTGTTGGTCGTG	CCTCCAGCAGAGCTTCAT
