# Supplementary material for: Overexpression of Lol-miR11467 negatively affects osmotic resistance in Larix kaempferi 3 × L. gmelinii 9
Source: BMC Plant Biol. 2025 May 6;25:592. doi: 10.1186/s12870-025-06591-x (PMC12054245; doi:10.1186/s12870-025-06591-x)
Supplement: Supplementary file 9 — Supplementary Material 9 [file 12870_2025_6591_MOESM9_ESM.xlsx]

## Sheet: Sheet1
Table S6 The primers used for quantitative real-time PCR
Gene ID	Forward primer (5'-3')	Reverse primer (5'-3')
TRINITY_DN95968	GGGTGGCCTGTAGAGCTTTACTTG	GGTATGAGCGTGATGAAGGTGGAG
TRINITY_DN93496	ACCAAGCTCCCAGATATCGTCTCC	TTCAGCCTCCTCATGCGACAAAC
TRINITY_DN83973	GCTGGGATTGTATGGGAGGAAGTC	GCCCCACCAACATAACCGAGATC
TRINITY_DN90569	AAGGGGAGGGTGAACCATCGTC	AGAGGAGGGACAAGAGGAACACAC
TRINITY_DN79877	ACGGTAAGCCTCGGTGACATCC	AACCAACTCTCGGCTGCACAAC
TRINITY_DN63493	AGACCAAGAAGCCGCAATCGC	ACACGCTGTTCCTGTGCCTTTG
TRINITY_DN72225	GTCGGTTCACTTCTCCATGCTCTC	AGCTAATGCAAACGCCTGATCTCC
TRINITY_DN89678	AGAGTCAACAGGTTGCCGTAAGC	GCCCAACTCATAATCGCTCCTTCG
TRINITY_DN78801	AGGCTGGCTTTGTTCTGAGTCATC	TGCTTGTTGGATGGAGGGAATCAG
TRINITY_DN91535	CGTGGGAAGACTGGTGGCAAAG	AGCATCCTCGAACGTCAAGCATTC
TRINITY_DN82923	CCTTAGATCAGTGCCCAGAATGCG	TGGCGAAGTACCTTCCGTCCTAC
TRINITY_DN68219	GGACTGGTGGTACAAGCGACTATG	GGTCCACTCCAGCCACACTTTAAC
TRINITY_DN84443	CTGCTTCCATAATCTCGCCCCTTC	ACGAGTCCAGTGAGCCAAGAGG
TRINITY_DN74854	GGCTCGCTGCTGGGGAAATAC	TCAGTACAGCATTGGCACCTAACC
TRINITY_DN82350	ACGGCAATCCTGGAGGACTCTAC	GCGGATCTCTTCACCAAGGCTTC
