# Supplementary material for: Overexpression of Lol-miR11467 negatively affects osmotic resistance in Larix kaempferi 3 × L. gmelinii 9
Source: BMC Plant Biol. 2025 May 6;25:592. doi: 10.1186/s12870-025-06591-x (PMC12054245; doi:10.1186/s12870-025-06591-x)
Supplement: Supplementary file 10 — Supplementary Material 10 [file 12870_2025_6591_MOESM10_ESM.xlsx]

## Sheet: Sheet1
Table S7 RNA-seq data sequencing quality assessment
Samples	Total reads	GC content (%)	Q20 (%)	Q30 (%)	Mean Quality Score	Total bases (G)
CK_1_clean_R1	32670104	43.75	98.21	94.12	36.11	4.8
CK_1_clean_R2	32670104	44.47	98.41	94.36	35.95	4.8
CK_2_clean_R1	26032569	43.89	98.2	94.11	36.11	3.8
CK_2_clean_R2	26032569	44.4	97.91	93.14	35.94	3.8
CK_3_clean_R1	27734846	43.84	98.21	94.12	36.11	4.1
CK_3_clean_R2	27734846	44.34	97.85	93	35.92	4.1
OE3_1_clean_R1	29608945	43.69	98.21	94.13	36.12	4.4
OE3_1_clean_R2	29608945	44.22	97.81	92.92	35.91	4.4
OE3_2_clean_R1	31054313	43.71	98.24	94.18	36.13	4.6
OE3_2_clean_R2	31054313	44.26	97.55	92.29	35.79	4.6
OE3_3_clean_R1	36000870	43.76	98.25	94.22	36.13	5.3
OE3_3_clean_R2	36000870	44.26	97.82	92.96	35.91	5.3
OE12_1_clean_R1	30747579	43.72	98.33	94.39	36.16	4.5
OE12_1_clean_R2	30747579	44.43	97.77	92.76	35.64	4.5
OE12_2_clean_R1	30007266	43.75	98.23	94.16	36.12	4.4
OE12_2_clean_R2	30007266	44.28	97.44	92.04	35.74	4.4
OE12_3_clean_R1	30820723	43.88	98.26	94.23	36.13	4.5
OE12_3_clean_R2	30820723	44.38	97.62	92.46	35.82	4.5
Sample: name of each sample, R1 and R2 represent the two ends of the double ended sequencing;
Input reads: Statistics on the number of filtered read segments (clean data);
GC content(%): The percentage of GC content in the sample;
Q20(%): The percentage of bases sequencing quality score greater than 20 in all bases;
Q30(%): The percentage of bases sequencing quality score greater than 30 in all bases;
Mean Quality Score: Average mass number of all bases;
Total bases(G): The base size in single file.
