# Supplementary material for: Overexpression of Lol-miR11467 negatively affects osmotic resistance in Larix kaempferi 3 × L. gmelinii 9
Source: BMC Plant Biol. 2025 May 6;25:592. doi: 10.1186/s12870-025-06591-x (PMC12054245; doi:10.1186/s12870-025-06591-x)
Supplement: Supplementary file 11 — Supplementary Material 11 [file 12870_2025_6591_MOESM11_ESM.xlsx]

## Sheet: Sheet1
Table S8 Alignment analysis of clean data to the reference genome
Sample ID	Input reads	Mapped reads	non-unique	unique	Read-1	Read-2	Reads map to '+'	Reads map to '-'	Mapped rate	Concordant pair alignment rate
CK_1	65340208	48557022	6368300	42188722	21094361	21094361	21094361	21094361	0.7431	74.31%
CK_2	52065138	38805964	5200222	33605742	16802871	16802871	16802871	16802871	0.7453	74.53%
CK_3	55469692	41395686	5468256	35927430	17963715	17963715	17963715	17963715	74.63%	74.63%
OE3_1	59217890	44096068	5788882	38307186	19153593	19153593	19153593	19153593	74.46%	74.46%
OE3_2	62108626	46199918	6045984	40153934	20076967	20076967	20076967	20076967	74.39%	74.39%
OE3_3	72001740	53632942	7068852	46564090	23282045	23282045	23282045	23282045	74.49%	74.49%
OE12_1	61495158	45724024	5927666	39796358	19898179	19898179	19898179	19898179	74.35%	74.35%
OE12_2	60014532	44872004	5939886	38932118	19466059	19466059	19466059	19466059	74.77%	74.77%
OE12_3	61641446	46167950	6153260	40014690	20007345	20007345	20007345	20007345	74.90%	74.9%
Input reads: Statistics on the number of filtered read segments (clean data);
Mapped reads/rate: Statistics on the number of reading segments compared to the reference genome. In general, if there is no pollution and the reference genome selection is appropriate, the percentage of this data is greater than 70%;
Non-unique: Statistics on the number of reading segments with multiple alignment positions on the reference genome;
Unique: Statistics on the number of reading segments with unique alignment positions on the reference genome;
Read-1, Read-2: Separate statistics of the number of reads that can be compared to the reference genome at the left and right ends of the dual end sequencing reading segment; Read-1 and Read-2 should be roughly the same;
Reads map to '+', Reads map to '-': Statistics on the number of read segments compared to the positive and negative strands of the reference genome;
Concordant pair alignment rate：The percentage of read pairs with correct relative direction and distance compared to all read pairs.
