# Supplementary material for: Overexpression of Lol-miR11467 negatively affects osmotic resistance in Larix kaempferi 3 × L. gmelinii 9
Source: BMC Plant Biol. 2025 May 6;25:592. doi: 10.1186/s12870-025-06591-x (PMC12054245; doi:10.1186/s12870-025-06591-x)
Supplement: Supplementary file 12 — Supplementary Material 12 [file 12870_2025_6591_MOESM12_ESM.xlsx]

## Sheet: Sheet1
Table S9 Annotation of differentially down-regulated genes
Gene ID	Annotation	Sample
TRINITY_DN70170_c0_g2_i1	UbiM-HptII [Binary vector pARS3m]	OE3 vs CK
TRINITY_DN94682_c1_g1_i1	unknown [Picea sitchensis]	OE3 vs CK
TRINITY_DN72484_c0_g1_i5	hypothetical protein AMTR_s00003p00256450 [Amborella trichopoda]	OE3 vs CK
TRINITY_DN87385_c0_g1_i1	hypothetical protein [Acinetobacter baumannii]	OE3 vs CK
TRINITY_DN67144_c0_g1_i1	unknown [Picea sitchensis]	OE3 vs CK
TRINITY_DN71323_c1_g3_i5	PREDICTED: elongation factor 1-alpha isoform X1 [Elaeis guineensis]	OE12 vs CK
TRINITY_DN83689_c5_g1_i1	PREDICTED: surfeit locus protein 1 [Nelumbo nucifera]	OE12 vs CK
TRINITY_DN66449_c1_g1_i1	SPI2 protein [Picea abies]	OE12 vs CK
TRINITY_DN70960_c0_g1_i3	AT-hook motif nuclear-localized protein 20-like [Carica papaya]	OE12 vs CK
TRINITY_DN69285_c0_g1_i1	unknown [Picea sitchensis]	OE3 vs CK, OE12 vs CK
TRINITY_DN71703_c10_g1_i5	hypothetical protein [Beta vulgaris subsp. vulgaris]	OE3 vs CK, OE12 vs CK
TRINITY_DN79063_c2_g2_i2	mitochondria-localized low molecular weight heat shock protein 23.5 [Picea glauca]	OE3 vs CK, OE12 vs CK
TRINITY_DN81156_c5_g5_i1	unknown [Picea sitchensis]	OE3 vs CK, OE12 vs CK
TRINITY_DN81411_c0_g5_i1	hypothetical protein EUGRSUZ_B03153 [Eucalyptus grandis]	OE3 vs CK, OE12 vs CK
TRINITY_DN82923_c1_g1_i22	transposase [Ipomoea nil]	OE3 vs CK, OE12 vs CK
TRINITY_DN89226_c0_g1_i1	uncharacterized protein CFP56_51839 [Quercus suber]	OE3 vs CK, OE12 vs CK
TRINITY_DN77139_c0_g3_i1	SCF ubiquitin ligase [uncultured eukaryote]	OE3 vs CK, OE12 vs CK
TRINITY_DN71573_c0_g2_i1	Nuclear transport factor 2 family protein, putative [Theobroma cacao]	OE3 vs CK, OE12 vs CK
