# Supplementary material for: Overexpression of Lol-miR11467 negatively affects osmotic resistance in Larix kaempferi 3 × L. gmelinii 9
Source: BMC Plant Biol. 2025 May 6;25:592. doi: 10.1186/s12870-025-06591-x (PMC12054245; doi:10.1186/s12870-025-06591-x)
Supplement: Supplementary file 13 — Supplementary Material 13 [file 12870_2025_6591_MOESM13_ESM.xlsx]

## Sheet: OE3 vs CK_GO_Enrichment
Table S10 The GO terms for enrichment of DEGs in OE3 vs CK
ID	Description	GeneRatio	BgRatio	pvalue	qvalue	GeneID	Input Hyperlink	Classification	Count
GO:0050896	response to stimulus	413/740	9969/21795	1.46745e-08	1.41169e-05	TRINITY_DN15130_c1_g1_i1;TRINITY_DN19531_c0_g1_i1;TRINITY_DN42865_c0_g1_i2;TRINITY_DN43850_c0_g1_i1;TRINITY_DN47199_c0_g1_i1;TRINITY_DN50025_c0_g1_i1;TRINITY_DN53892_c1_g1_i1;TRINITY_DN57153_c0_g1_i1;TRINITY_DN58158_c0_g1_i1;TRINITY_DN62427_c0_g1_i1;TRINITY_DN63681_c0_g1_i1;TRINITY_DN63938_c0_g1_i1;TRINITY_DN64333_c0_g1_i2;TRINITY_DN64892_c0_g1_i1;TRINITY_DN65230_c0_g2_i1;TRINITY_DN65523_c0_g1_i1…	http://amigo.geneontology.org/amigo/term/GO:0050896	BP	413
GO:0030995	cell septum edging catabolic process	6/740	8/21795	3.96679e-08	2.03405e-05	TRINITY_DN81193_c0_g2_i4;TRINITY_DN81193_c0_g1_i3;TRINITY_DN89202_c1_g2_i1;TRINITY_DN89202_c1_g4_i1;TRINITY_DN89202_c1_g5_i1;TRINITY_DN89202_c1_g6_i3	http://amigo.geneontology.org/amigo/term/GO:0030995	BP	6
GO:0042221	response to chemical	263/740	5832/21795	5.76748e-08	2.14238e-05	TRINITY_DN15130_c1_g1_i1;TRINITY_DN42865_c0_g1_i2;TRINITY_DN47199_c0_g1_i1;TRINITY_DN57153_c0_g1_i1;TRINITY_DN63681_c0_g1_i1;TRINITY_DN64892_c0_g1_i1;TRINITY_DN65230_c0_g2_i1;TRINITY_DN65523_c0_g1_i1;TRINITY_DN65778_c0_g1_i1;TRINITY_DN66170_c0_g1_i1;TRINITY_DN66297_c0_g1_i1;TRINITY_DN66576_c0_g1_i2;TRINITY_DN67443_c0_g1_i2;TRINITY_DN67782_c0_g1_i1;TRINITY_DN67988_c0_g1_i1;TRINITY_DN68559_c0_g1_i2…	http://amigo.geneontology.org/amigo/term/GO:0042221	BP	263
GO:0009699	phenylpropanoid biosynthetic process	24/740	196/21795	5.93868e-08	2.14238e-05	TRINITY_DN65523_c0_g1_i1;TRINITY_DN69553_c0_g1_i1;TRINITY_DN74169_c0_g7_i1;TRINITY_DN77728_c3_g4_i1;TRINITY_DN79326_c0_g1_i1;TRINITY_DN80750_c0_g2_i6;TRINITY_DN83499_c1_g7_i1;TRINITY_DN83913_c3_g5_i1;TRINITY_DN85312_c0_g4_i1;TRINITY_DN85524_c1_g2_i6;TRINITY_DN87396_c1_g2_i6;TRINITY_DN89554_c1_g1_i1;TRINITY_DN89937_c1_g9_i1;TRINITY_DN90326_c0_g1_i5;TRINITY_DN90371_c1_g1_i1;TRINITY_DN91241_c1_g1_i1…	http://amigo.geneontology.org/amigo/term/GO:0009699	BP	24
GO:0044550	secondary metabolite biosynthetic process	29/740	275/21795	7.30227e-08	2.34159e-05	TRINITY_DN65523_c0_g1_i1;TRINITY_DN67629_c0_g1_i1;TRINITY_DN69553_c0_g1_i1;TRINITY_DN70602_c0_g2_i1;TRINITY_DN73594_c1_g1_i2;TRINITY_DN74169_c0_g7_i1;TRINITY_DN77590_c0_g3_i1;TRINITY_DN77728_c3_g4_i1;TRINITY_DN79326_c0_g1_i1;TRINITY_DN80750_c0_g2_i6;TRINITY_DN83499_c1_g7_i1;TRINITY_DN83913_c3_g5_i1;TRINITY_DN85312_c0_g4_i1;TRINITY_DN85524_c1_g2_i6;TRINITY_DN87396_c1_g2_i6;TRINITY_DN88582_c7_g2_i1…	http://amigo.geneontology.org/amigo/term/GO:0044550	BP	29
GO:0010033	response to organic substance	174/740	3519/21795	8.37798e-08	2.41789e-05	TRINITY_DN15130_c1_g1_i1;TRINITY_DN42865_c0_g1_i2;TRINITY_DN47199_c0_g1_i1;TRINITY_DN57153_c0_g1_i1;TRINITY_DN64892_c0_g1_i1;TRINITY_DN66170_c0_g1_i1;TRINITY_DN66576_c0_g1_i2;TRINITY_DN67443_c0_g1_i2;TRINITY_DN67782_c0_g1_i1;TRINITY_DN67988_c0_g1_i1;TRINITY_DN68559_c0_g1_i2;TRINITY_DN68780_c0_g2_i2;TRINITY_DN69022_c0_g1_i1;TRINITY_DN69048_c0_g1_i1;TRINITY_DN69285_c0_g1_i1;TRINITY_DN69811_c0_g2_i1…	http://amigo.geneontology.org/amigo/term/GO:0010033	BP	174
GO:0009725	response to hormone	127/740	2460/21795	8.30892e-07	0.00020356	TRINITY_DN15130_c1_g1_i1;TRINITY_DN42865_c0_g1_i2;TRINITY_DN47199_c0_g1_i1;TRINITY_DN57153_c0_g1_i1;TRINITY_DN64892_c0_g1_i1;TRINITY_DN66170_c0_g1_i1;TRINITY_DN66576_c0_g1_i2;TRINITY_DN67782_c0_g1_i1;TRINITY_DN67988_c0_g1_i1;TRINITY_DN68559_c0_g1_i2;TRINITY_DN68780_c0_g2_i2;TRINITY_DN69022_c0_g1_i1;TRINITY_DN69048_c0_g1_i1;TRINITY_DN69811_c0_g2_i1;TRINITY_DN70135_c0_g2_i3;TRINITY_DN70602_c0_g1_i1…	http://amigo.geneontology.org/amigo/term/GO:0009725	BP	127
GO:0009698	phenylpropanoid metabolic process	25/740	242/21795	8.46404e-07	0.00020356	TRINITY_DN65523_c0_g1_i1;TRINITY_DN69553_c0_g1_i1;TRINITY_DN71247_c1_g1_i1;TRINITY_DN74169_c0_g7_i1;TRINITY_DN77728_c3_g4_i1;TRINITY_DN79326_c0_g1_i1;TRINITY_DN80750_c0_g2_i6;TRINITY_DN83499_c1_g7_i1;TRINITY_DN83913_c3_g5_i1;TRINITY_DN85312_c0_g4_i1;TRINITY_DN85524_c1_g2_i6;TRINITY_DN87396_c1_g2_i6;TRINITY_DN89554_c1_g1_i1;TRINITY_DN89937_c1_g9_i1;TRINITY_DN90326_c0_g1_i5;TRINITY_DN90371_c1_g1_i1…	http://amigo.geneontology.org/amigo/term/GO:0009698	BP	25
GO:0009313	oligosaccharide catabolic process	11/740	55/21795	1.96497e-06	0.000384661	TRINITY_DN42865_c0_g1_i2;TRINITY_DN76717_c5_g1_i1;TRINITY_DN81193_c0_g2_i4;TRINITY_DN81193_c0_g1_i3;TRINITY_DN82953_c1_g1_i7;TRINITY_DN86638_c3_g6_i2;TRINITY_DN89202_c1_g2_i1;TRINITY_DN89202_c1_g4_i1;TRINITY_DN89202_c1_g5_i1;TRINITY_DN89202_c1_g6_i3;TRINITY_DN94133_c0_g1_i8	http://amigo.geneontology.org/amigo/term/GO:0009313	BP	11
GO:0019748	secondary metabolic process	38/740	488/21795	1.99928e-06	0.000384661	TRINITY_DN65523_c0_g1_i1;TRINITY_DN67629_c0_g1_i1;TRINITY_DN69553_c0_g1_i1;TRINITY_DN70602_c0_g2_i1;TRINITY_DN71247_c1_g1_i1;TRINITY_DN72144_c3_g1_i1;TRINITY_DN73594_c1_g1_i2;TRINITY_DN74169_c0_g7_i1;TRINITY_DN77590_c0_g3_i1;TRINITY_DN77728_c3_g4_i1;TRINITY_DN79326_c0_g1_i1;TRINITY_DN80750_c0_g2_i6;TRINITY_DN81698_c0_g3_i1;TRINITY_DN83499_c1_g7_i1;TRINITY_DN83913_c3_g5_i1;TRINITY_DN85312_c0_g4_i1…	http://amigo.geneontology.org/amigo/term/GO:0019748	BP	38
GO:0009813	flavonoid biosynthetic process	18/740	148/21795	2.91224e-06	0.000525296	TRINITY_DN72482_c0_g2_i1;TRINITY_DN77590_c0_g5_i1;TRINITY_DN77590_c0_g8_i1;TRINITY_DN80750_c0_g2_i6;TRINITY_DN82735_c0_g4_i1;TRINITY_DN85132_c3_g1_i3;TRINITY_DN85524_c1_g2_i6;TRINITY_DN87659_c0_g1_i4;TRINITY_DN89151_c0_g1_i9;TRINITY_DN91241_c1_g1_i1;TRINITY_DN91252_c1_g2_i4;TRINITY_DN93991_c2_g2_i5;TRINITY_DN93991_c3_g1_i3;TRINITY_DN94631_c2_g1_i2;TRINITY_DN94631_c2_g7_i1;TRINITY_DN94747_c1_g1_i2…	http://amigo.geneontology.org/amigo/term/GO:0009813	BP	18
GO:0080167	response to karrikin	31/740	370/21795	4.01466e-06	0.000681548	TRINITY_DN65523_c0_g1_i1;TRINITY_DN69179_c1_g1_i2;TRINITY_DN71247_c1_g1_i1;TRINITY_DN71913_c0_g1_i1;TRINITY_DN72971_c0_g1_i3;TRINITY_DN74732_c1_g2_i2;TRINITY_DN74807_c2_g1_i3;TRINITY_DN75901_c0_g1_i3;TRINITY_DN76571_c0_g1_i2;TRINITY_DN78484_c3_g6_i1;TRINITY_DN79224_c0_g1_i6;TRINITY_DN81698_c0_g3_i1;TRINITY_DN82036_c3_g1_i3;TRINITY_DN84703_c4_g1_i1;TRINITY_DN85813_c5_g1_i1;TRINITY_DN86016_c4_g4_i1…	http://amigo.geneontology.org/amigo/term/GO:0080167	BP	31
GO:0009812	flavonoid metabolic process	18/740	156/21795	6.17849e-06	0.000990617	TRINITY_DN72482_c0_g2_i1;TRINITY_DN77590_c0_g5_i1;TRINITY_DN77590_c0_g8_i1;TRINITY_DN80750_c0_g2_i6;TRINITY_DN82735_c0_g4_i1;TRINITY_DN85132_c3_g1_i3;TRINITY_DN85524_c1_g2_i6;TRINITY_DN87659_c0_g1_i4;TRINITY_DN89151_c0_g1_i9;TRINITY_DN91241_c1_g1_i1;TRINITY_DN91252_c1_g2_i4;TRINITY_DN93991_c2_g2_i5;TRINITY_DN93991_c3_g1_i3;TRINITY_DN94631_c2_g1_i2;TRINITY_DN94631_c2_g7_i1;TRINITY_DN94747_c1_g1_i2…	http://amigo.geneontology.org/amigo/term/GO:0009812	BP	18
GO:0071407	cellular response to organic cyclic compound	36/740	490/21795	1.3426e-05	0.00203934	TRINITY_DN15130_c1_g1_i1;TRINITY_DN68559_c0_g1_i2;TRINITY_DN69048_c0_g1_i1;TRINITY_DN70721_c0_g5_i1;TRINITY_DN70721_c0_g9_i2;TRINITY_DN72570_c0_g1_i6;TRINITY_DN73594_c1_g1_i2;TRINITY_DN74399_c0_g2_i2;TRINITY_DN74753_c0_g1_i1;TRINITY_DN75152_c3_g2_i1;TRINITY_DN77123_c1_g2_i8;TRINITY_DN77451_c0_g4_i1;TRINITY_DN78300_c2_g8_i1;TRINITY_DN78368_c1_g5_i1;TRINITY_DN79255_c2_g3_i2;TRINITY_DN79601_c8_g1_i4…	http://amigo.geneontology.org/amigo/term/GO:0071407	BP	36
GO:0014070	response to organic cyclic compound	54/740	891/21795	2.95889e-05	0.00371277	TRINITY_DN15130_c1_g1_i1;TRINITY_DN67443_c0_g1_i2;TRINITY_DN68559_c0_g1_i2;TRINITY_DN69048_c0_g1_i1;TRINITY_DN70721_c0_g5_i1;TRINITY_DN70721_c0_g9_i2;TRINITY_DN71390_c0_g1_i2;TRINITY_DN72127_c0_g4_i3;TRINITY_DN72423_c0_g1_i1;TRINITY_DN72423_c1_g1_i2;TRINITY_DN72570_c0_g1_i6;TRINITY_DN73594_c1_g1_i2;TRINITY_DN74399_c0_g2_i2;TRINITY_DN74753_c0_g1_i1;TRINITY_DN75152_c3_g2_i1;TRINITY_DN75500_c1_g1_i1…	http://amigo.geneontology.org/amigo/term/GO:0014070	BP	54
GO:0033993	response to lipid	77/740	1446/21795	5.75194e-05	0.00691671	TRINITY_DN15130_c1_g1_i1;TRINITY_DN42865_c0_g1_i2;TRINITY_DN57153_c0_g1_i1;TRINITY_DN66576_c0_g1_i2;TRINITY_DN68559_c0_g1_i2;TRINITY_DN68780_c0_g2_i2;TRINITY_DN69022_c0_g1_i1;TRINITY_DN69048_c0_g1_i1;TRINITY_DN69811_c0_g2_i1;TRINITY_DN70682_c0_g1_i1;TRINITY_DN70871_c0_g1_i1;TRINITY_DN71256_c4_g1_i1;TRINITY_DN71392_c0_g1_i7;TRINITY_DN71536_c0_g1_i2;TRINITY_DN71536_c0_g2_i4;TRINITY_DN71678_c0_g1_i1…	http://amigo.geneontology.org/amigo/term/GO:0033993	BP	77
GO:0010067	procambium histogenesis	8/740	42/21795	7.2127e-05	0.00832634	TRINITY_DN68775_c1_g1_i1;TRINITY_DN73973_c3_g2_i1;TRINITY_DN74175_c1_g3_i2;TRINITY_DN84005_c0_g1_i6;TRINITY_DN86200_c0_g1_i3;TRINITY_DN89614_c0_g3_i2;TRINITY_DN94961_c1_g4_i1;TRINITY_DN96349_c3_g13_i1	http://amigo.geneontology.org/amigo/term/GO:0010067	BP	8
GO:0009739	response to gibberellin	17/740	171/21795	7.62089e-05	0.00845919	TRINITY_DN42865_c0_g1_i2;TRINITY_DN57153_c0_g1_i1;TRINITY_DN71392_c0_g1_i7;TRINITY_DN71536_c0_g1_i2;TRINITY_DN71536_c0_g2_i4;TRINITY_DN71678_c0_g1_i1;TRINITY_DN74918_c0_g3_i1;TRINITY_DN77500_c3_g6_i1;TRINITY_DN78565_c0_g1_i1;TRINITY_DN78980_c2_g2_i3;TRINITY_DN82953_c1_g1_i7;TRINITY_DN86809_c0_g1_i8;TRINITY_DN91863_c1_g3_i1;TRINITY_DN93504_c0_g1_i1;TRINITY_DN93473_c3_g1_i1;TRINITY_DN93501_c0_g3_i1…	http://amigo.geneontology.org/amigo/term/GO:0009739	BP	17
GO:0048646	anatomical structure formation involved in morphogenesis	42/740	667/21795	9.91584e-05	0.0105989	TRINITY_DN43850_c0_g1_i1;TRINITY_DN62693_c0_g1_i1;TRINITY_DN67350_c0_g1_i1;TRINITY_DN71355_c0_g1_i1;TRINITY_DN71772_c1_g1_i1;TRINITY_DN72838_c0_g1_i11;TRINITY_DN73585_c1_g5_i1;TRINITY_DN73792_c0_g1_i3;TRINITY_DN75000_c0_g2_i3;TRINITY_DN75510_c0_g5_i4;TRINITY_DN77419_c0_g1_i10;TRINITY_DN77500_c3_g6_i1;TRINITY_DN78300_c2_g8_i1;TRINITY_DN78637_c1_g1_i3;TRINITY_DN79255_c2_g3_i2;TRINITY_DN80331_c0_g6_…	http://amigo.geneontology.org/amigo/term/GO:0048646	BP	42
GO:0034389	lipid particle organization	4/740	9/21795	0.000144916	0.0149367	TRINITY_DN63938_c0_g1_i1;TRINITY_DN73326_c0_g1_i1;TRINITY_DN73326_c0_g3_i3;TRINITY_DN91981_c0_g3_i2	http://amigo.geneontology.org/amigo/term/GO:0034389	BP	4
GO:0010023	proanthocyanidin biosynthetic process	7/740	36/21795	0.000178616	0.0177754	TRINITY_DN79326_c0_g1_i1;TRINITY_DN83913_c3_g5_i1;TRINITY_DN85524_c1_g2_i6;TRINITY_DN90371_c1_g1_i1;TRINITY_DN91241_c1_g1_i1;TRINITY_DN94631_c2_g1_i2;TRINITY_DN94631_c2_g7_i1	http://amigo.geneontology.org/amigo/term/GO:0010023	BP	7
GO:0006952	defense response	79/740	1557/21795	0.000218423	0.0210123	TRINITY_DN50025_c0_g1_i1;TRINITY_DN63938_c0_g1_i1;TRINITY_DN64333_c0_g1_i2;TRINITY_DN65768_c0_g1_i1;TRINITY_DN66170_c0_g1_i1;TRINITY_DN67443_c0_g1_i2;TRINITY_DN67891_c0_g1_i1;TRINITY_DN70135_c0_g2_i3;TRINITY_DN70263_c0_g1_i2;TRINITY_DN70538_c0_g1_i1;TRINITY_DN70721_c0_g5_i1;TRINITY_DN70721_c0_g9_i2;TRINITY_DN72627_c2_g1_i3;TRINITY_DN73242_c7_g1_i9;TRINITY_DN73326_c0_g1_i1;TRINITY_DN73326_c0_g3_i3…	http://amigo.geneontology.org/amigo/term/GO:0006952	BP	79
GO:0009611	response to wounding	36/740	566/21795	0.000252911	0.0235452	TRINITY_DN67782_c0_g1_i1;TRINITY_DN70871_c0_g1_i1;TRINITY_DN72627_c2_g1_i3;TRINITY_DN73332_c4_g2_i2;TRINITY_DN73594_c1_g1_i2;TRINITY_DN73792_c0_g1_i3;TRINITY_DN74753_c0_g1_i1;TRINITY_DN75355_c1_g1_i13;TRINITY_DN76540_c4_g1_i2;TRINITY_DN77590_c0_g5_i1;TRINITY_DN77590_c0_g8_i1;TRINITY_DN78068_c2_g3_i2;TRINITY_DN81414_c3_g3_i6;TRINITY_DN81835_c2_g1_i3;TRINITY_DN82128_c1_g2_i2;TRINITY_DN84013_c3_g1_i…	http://amigo.geneontology.org/amigo/term/GO:0009611	BP	36
GO:0000920	cell separation after cytokinesis	6/740	29/21795	0.00036538	0.0310143	TRINITY_DN81193_c0_g2_i4;TRINITY_DN81193_c0_g1_i3;TRINITY_DN89202_c1_g2_i1;TRINITY_DN89202_c1_g4_i1;TRINITY_DN89202_c1_g5_i1;TRINITY_DN89202_c1_g6_i3	http://amigo.geneontology.org/amigo/term/GO:0000920	BP	6
GO:0051707	response to other organism	99/740	2090/21795	0.000411514	0.0337459	TRINITY_DN50025_c0_g1_i1;TRINITY_DN62427_c0_g1_i1;TRINITY_DN64333_c0_g1_i2;TRINITY_DN65768_c0_g1_i1;TRINITY_DN66170_c0_g1_i1;TRINITY_DN67443_c0_g1_i2;TRINITY_DN67891_c0_g1_i1;TRINITY_DN70135_c0_g2_i3;TRINITY_DN70263_c0_g1_i2;TRINITY_DN70538_c0_g1_i1;TRINITY_DN70640_c1_g1_i2;TRINITY_DN70721_c0_g5_i1;TRINITY_DN70721_c0_g9_i2;TRINITY_DN72627_c2_g1_i3;TRINITY_DN73242_c7_g1_i9;TRINITY_DN73332_c4_g2_i2…	http://amigo.geneontology.org/amigo/term/GO:0051707	BP	99
GO:0046379	extracellular polysaccharide metabolic process	6/740	30/21795	0.000443726	0.0346106	TRINITY_DN81193_c0_g2_i4;TRINITY_DN81193_c0_g1_i3;TRINITY_DN89202_c1_g2_i1;TRINITY_DN89202_c1_g4_i1;TRINITY_DN89202_c1_g5_i1;TRINITY_DN89202_c1_g6_i3	http://amigo.geneontology.org/amigo/term/GO:0046379	BP	6
GO:0009607	response to biotic stimulus	99/740	2097/21795	0.000461445	0.0350455	TRINITY_DN50025_c0_g1_i1;TRINITY_DN62427_c0_g1_i1;TRINITY_DN64333_c0_g1_i2;TRINITY_DN65768_c0_g1_i1;TRINITY_DN66170_c0_g1_i1;TRINITY_DN67443_c0_g1_i2;TRINITY_DN67891_c0_g1_i1;TRINITY_DN70135_c0_g2_i3;TRINITY_DN70263_c0_g1_i2;TRINITY_DN70538_c0_g1_i1;TRINITY_DN70640_c1_g1_i2;TRINITY_DN70721_c0_g5_i1;TRINITY_DN70721_c0_g9_i2;TRINITY_DN72627_c2_g1_i3;TRINITY_DN73242_c7_g1_i9;TRINITY_DN73332_c4_g2_i2…	http://amigo.geneontology.org/amigo/term/GO:0009607	BP	99
GO:0044247	cellular polysaccharide catabolic process	11/740	101/21795	0.000635782	0.0433222	TRINITY_DN42865_c0_g1_i2;TRINITY_DN69811_c0_g2_i1;TRINITY_DN76717_c5_g1_i1;TRINITY_DN81193_c0_g2_i4;TRINITY_DN81193_c0_g1_i3;TRINITY_DN82953_c1_g1_i7;TRINITY_DN89202_c1_g2_i1;TRINITY_DN89202_c1_g4_i1;TRINITY_DN89202_c1_g5_i1;TRINITY_DN89202_c1_g6_i3;TRINITY_DN94133_c0_g1_i8	http://amigo.geneontology.org/amigo/term/GO:0044247	BP	11
GO:0010167	response to nitrate	8/740	57/21795	0.000645479	0.0433222	TRINITY_DN72290_c0_g2_i2;TRINITY_DN73821_c5_g2_i1;TRINITY_DN74250_c0_g1_i1;TRINITY_DN89850_c5_g1_i3;TRINITY_DN90452_c1_g6_i1;TRINITY_DN90452_c1_g2_i3;TRINITY_DN91622_c0_g2_i1;TRINITY_DN91622_c0_g1_i2	http://amigo.geneontology.org/amigo/term/GO:0010167	BP	8
GO:0030422	production of siRNA involved in RNA interference	11/740	102/21795	0.000691225	0.0443305	TRINITY_DN68559_c0_g1_i2;TRINITY_DN77123_c1_g2_i8;TRINITY_DN77451_c0_g4_i1;TRINITY_DN81280_c0_g1_i1;TRINITY_DN84723_c0_g4_i1;TRINITY_DN85827_c2_g1_i4;TRINITY_DN86585_c0_g1_i8;TRINITY_DN88658_c1_g3_i5;TRINITY_DN92796_c5_g1_i1;TRINITY_DN93493_c1_g2_i5;TRINITY_DN215683_c0_g1_i1	http://amigo.geneontology.org/amigo/term/GO:0030422	BP	11
GO:0000272	polysaccharide catabolic process	13/740	138/21795	0.000861123	0.0531318	TRINITY_DN42865_c0_g1_i2;TRINITY_DN69811_c0_g2_i1;TRINITY_DN75350_c1_g3_i2;TRINITY_DN76717_c5_g1_i1;TRINITY_DN81193_c0_g2_i4;TRINITY_DN81193_c0_g1_i3;TRINITY_DN82953_c1_g1_i7;TRINITY_DN89202_c1_g2_i1;TRINITY_DN89202_c1_g4_i1;TRINITY_DN89202_c1_g5_i1;TRINITY_DN89202_c1_g6_i3;TRINITY_DN94133_c0_g1_i8;TRINITY_DN94611_c6_g4_i1	http://amigo.geneontology.org/amigo/term/GO:0000272	BP	13
GO:0071359	cellular response to dsRNA	12/740	122/21795	0.00092051	0.0531318	TRINITY_DN68559_c0_g1_i2;TRINITY_DN77123_c1_g2_i8;TRINITY_DN77451_c0_g4_i1;TRINITY_DN81280_c0_g1_i1;TRINITY_DN84723_c0_g4_i1;TRINITY_DN85827_c2_g1_i4;TRINITY_DN86585_c0_g1_i8;TRINITY_DN88658_c1_g3_i5;TRINITY_DN92454_c3_g1_i1;TRINITY_DN92796_c5_g1_i1;TRINITY_DN93493_c1_g2_i5;TRINITY_DN215683_c0_g1_i1	http://amigo.geneontology.org/amigo/term/GO:0071359	BP	12
GO:0031050	dsRNA fragmentation	12/740	122/21795	0.00092051	0.0531318	TRINITY_DN68559_c0_g1_i2;TRINITY_DN77123_c1_g2_i8;TRINITY_DN77451_c0_g4_i1;TRINITY_DN81280_c0_g1_i1;TRINITY_DN84723_c0_g4_i1;TRINITY_DN85827_c2_g1_i4;TRINITY_DN86585_c0_g1_i8;TRINITY_DN88658_c1_g3_i5;TRINITY_DN92454_c3_g1_i1;TRINITY_DN92796_c5_g1_i1;TRINITY_DN93493_c1_g2_i5;TRINITY_DN215683_c0_g1_i1	http://amigo.geneontology.org/amigo/term/GO:0031050	BP	12
GO:0043331	response to dsRNA	12/740	122/21795	0.00092051	0.0531318	TRINITY_DN68559_c0_g1_i2;TRINITY_DN77123_c1_g2_i8;TRINITY_DN77451_c0_g4_i1;TRINITY_DN81280_c0_g1_i1;TRINITY_DN84723_c0_g4_i1;TRINITY_DN85827_c2_g1_i4;TRINITY_DN86585_c0_g1_i8;TRINITY_DN88658_c1_g3_i5;TRINITY_DN92454_c3_g1_i1;TRINITY_DN92796_c5_g1_i1;TRINITY_DN93493_c1_g2_i5;TRINITY_DN215683_c0_g1_i1	http://amigo.geneontology.org/amigo/term/GO:0043331	BP	12
GO:0070918	production of small RNA involved in gene silencing by RNA	12/740	122/21795	0.00092051	0.0531318	TRINITY_DN68559_c0_g1_i2;TRINITY_DN77123_c1_g2_i8;TRINITY_DN77451_c0_g4_i1;TRINITY_DN81280_c0_g1_i1;TRINITY_DN84723_c0_g4_i1;TRINITY_DN85827_c2_g1_i4;TRINITY_DN86585_c0_g1_i8;TRINITY_DN88658_c1_g3_i5;TRINITY_DN92454_c3_g1_i1;TRINITY_DN92796_c5_g1_i1;TRINITY_DN93493_c1_g2_i5;TRINITY_DN215683_c0_g1_i1	http://amigo.geneontology.org/amigo/term/GO:0070918	BP	12
GO:0010241	ent-kaurene oxidation to kaurenoic acid	2/740	2/21795	0.00115128	0.0626907	TRINITY_DN71536_c0_g1_i2;TRINITY_DN71536_c0_g2_i4	http://amigo.geneontology.org/amigo/term/GO:0010241	BP	2
GO:0018958	phenol-containing compound metabolic process	8/740	63/21795	0.00126601	0.0676611	TRINITY_DN43850_c0_g1_i1;TRINITY_DN79326_c0_g1_i1;TRINITY_DN83913_c3_g5_i1;TRINITY_DN85524_c1_g2_i6;TRINITY_DN90371_c1_g1_i1;TRINITY_DN91241_c1_g1_i1;TRINITY_DN94631_c2_g1_i2;TRINITY_DN94631_c2_g7_i1	http://amigo.geneontology.org/amigo/term/GO:0018958	BP	8
GO:0080170	hydrogen peroxide transmembrane transport	5/740	25/21795	0.00134379	0.0705124	TRINITY_DN76232_c4_g1_i1;TRINITY_DN79540_c0_g3_i4;TRINITY_DN82530_c2_g2_i2;TRINITY_DN83527_c2_g2_i3;TRINITY_DN83527_c3_g5_i1	http://amigo.geneontology.org/amigo/term/GO:0080170	BP	5
GO:0009808	lignin metabolic process	12/740	131/21795	0.00170813	0.0821611	TRINITY_DN65523_c0_g1_i1;TRINITY_DN71247_c1_g1_i1;TRINITY_DN74169_c0_g7_i1;TRINITY_DN77728_c3_g4_i1;TRINITY_DN80750_c0_g2_i6;TRINITY_DN83499_c1_g7_i1;TRINITY_DN87396_c1_g2_i6;TRINITY_DN89554_c1_g1_i1;TRINITY_DN89937_c1_g9_i1;TRINITY_DN90326_c0_g1_i5;TRINITY_DN93991_c2_g2_i5;TRINITY_DN93991_c3_g1_i3	http://amigo.geneontology.org/amigo/term/GO:0009808	BP	12
GO:0009751	response to salicylic acid	28/740	453/21795	0.00180355	0.0839525	TRINITY_DN67443_c0_g1_i2;TRINITY_DN70721_c0_g5_i1;TRINITY_DN70721_c0_g9_i2;TRINITY_DN71390_c0_g1_i2;TRINITY_DN72127_c0_g4_i3;TRINITY_DN73594_c1_g1_i2;TRINITY_DN74753_c0_g1_i1;TRINITY_DN78300_c2_g8_i1;TRINITY_DN78980_c2_g2_i3;TRINITY_DN79255_c2_g3_i2;TRINITY_DN79655_c3_g2_i3;TRINITY_DN79971_c0_g2_i4;TRINITY_DN82278_c3_g5_i1;TRINITY_DN83068_c1_g1_i1;TRINITY_DN84755_c2_g5_i3;TRINITY_DN85192_c0_g2_i3…	http://amigo.geneontology.org/amigo/term/GO:0009751	BP	28
GO:0016197	endosomal transport	9/740	82/21795	0.00183352	0.0839925	TRINITY_DN68282_c0_g1_i1;TRINITY_DN73386_c0_g5_i1;TRINITY_DN73631_c1_g2_i1;TRINITY_DN74186_c0_g1_i3;TRINITY_DN81011_c0_g2_i4;TRINITY_DN82697_c2_g3_i1;TRINITY_DN86288_c3_g4_i1;TRINITY_DN86583_c0_g3_i1;TRINITY_DN89966_c3_g2_i2	http://amigo.geneontology.org/amigo/term/GO:0016197	BP	9
GO:0071310	cellular response to organic substance	77/740	1632/21795	0.002061	0.0911209	TRINITY_DN15130_c1_g1_i1;TRINITY_DN57153_c0_g1_i1;TRINITY_DN64892_c0_g1_i1;TRINITY_DN66576_c0_g1_i2;TRINITY_DN67988_c0_g1_i1;TRINITY_DN68559_c0_g1_i2;TRINITY_DN68780_c0_g2_i2;TRINITY_DN69048_c0_g1_i1;TRINITY_DN69285_c0_g1_i1;TRINITY_DN69811_c0_g2_i1;TRINITY_DN70602_c0_g1_i1;TRINITY_DN70602_c0_g2_i1;TRINITY_DN70682_c0_g1_i1;TRINITY_DN70721_c0_g5_i1;TRINITY_DN70721_c0_g9_i2;TRINITY_DN71392_c0_g1_i7…	http://amigo.geneontology.org/amigo/term/GO:0071310	BP	77
GO:0009862	systemic acquired resistance, salicylic acid mediated signaling pathway	13/740	152/21795	0.00207789	0.0911209	TRINITY_DN70721_c0_g5_i1;TRINITY_DN70721_c0_g9_i2;TRINITY_DN73594_c1_g1_i2;TRINITY_DN78300_c2_g8_i1;TRINITY_DN79255_c2_g3_i2;TRINITY_DN82278_c3_g5_i1;TRINITY_DN83068_c1_g1_i1;TRINITY_DN84755_c2_g5_i3;TRINITY_DN85192_c0_g2_i3;TRINITY_DN88648_c1_g2_i3;TRINITY_DN89843_c3_g1_i1;TRINITY_DN89843_c3_g2_i3;TRINITY_DN96995_c4_g4_i1	http://amigo.geneontology.org/amigo/term/GO:0009862	BP	13
GO:0009962	regulation of flavonoid biosynthetic process	8/740	68/21795	0.00208385	0.0911209	TRINITY_DN76557_c0_g2_i4;TRINITY_DN76557_c0_g5_i1;TRINITY_DN77590_c0_g5_i1;TRINITY_DN77590_c0_g8_i1;TRINITY_DN91602_c1_g2_i4;TRINITY_DN94747_c1_g1_i2;TRINITY_DN94747_c1_g4_i2;TRINITY_DN96704_c2_g1_i1	http://amigo.geneontology.org/amigo/term/GO:0009962	BP	8
GO:0042372	phylloquinone biosynthetic process	4/740	17/21795	0.00220341	0.094911	TRINITY_DN68223_c0_g1_i1;TRINITY_DN75727_c2_g2_i4;TRINITY_DN81343_c1_g2_i1;TRINITY_DN82173_c5_g1_i1	http://amigo.geneontology.org/amigo/term/GO:0042372	BP	4
GO:0006833	water transport	9/740	85/21795	0.00235511	0.0985052	TRINITY_DN67293_c0_g1_i2;TRINITY_DN70801_c0_g1_i6;TRINITY_DN70801_c0_g2_i1;TRINITY_DN76232_c4_g1_i1;TRINITY_DN82530_c2_g2_i2;TRINITY_DN82530_c2_g1_i3;TRINITY_DN83281_c0_g1_i3;TRINITY_DN83527_c2_g2_i3;TRINITY_DN83527_c3_g5_i1	http://amigo.geneontology.org/amigo/term/GO:0006833	BP	9
GO:0042044	fluid transport	9/740	85/21795	0.00235511	0.0985052	TRINITY_DN67293_c0_g1_i2;TRINITY_DN70801_c0_g1_i6;TRINITY_DN70801_c0_g2_i1;TRINITY_DN76232_c4_g1_i1;TRINITY_DN82530_c2_g2_i2;TRINITY_DN82530_c2_g1_i3;TRINITY_DN83281_c0_g1_i3;TRINITY_DN83527_c2_g2_i3;TRINITY_DN83527_c3_g5_i1	http://amigo.geneontology.org/amigo/term/GO:0042044	BP	9
GO:0009628	response to abiotic stimulus	174/740	4219/21795	0.00251475	0.103679	TRINITY_DN15130_c1_g1_i1;TRINITY_DN19531_c0_g1_i1;TRINITY_DN58158_c0_g1_i1;TRINITY_DN64333_c0_g1_i2;TRINITY_DN65523_c0_g1_i1;TRINITY_DN66170_c0_g1_i1;TRINITY_DN67782_c0_g1_i1;TRINITY_DN67891_c0_g1_i1;TRINITY_DN68780_c0_g2_i2;TRINITY_DN69022_c0_g1_i1;TRINITY_DN69179_c1_g1_i2;TRINITY_DN69285_c0_g1_i1;TRINITY_DN69362_c0_g1_i2;TRINITY_DN69811_c0_g2_i1;TRINITY_DN70135_c0_g2_i3;TRINITY_DN70380_c0_g5_i1…	http://amigo.geneontology.org/amigo/term/GO:0009628	BP	174
GO:0097305	response to alcohol	64/740	1323/21795	0.0027574	0.110526	TRINITY_DN15130_c1_g1_i1;TRINITY_DN42865_c0_g1_i2;TRINITY_DN66576_c0_g1_i2;TRINITY_DN68559_c0_g1_i2;TRINITY_DN68780_c0_g2_i2;TRINITY_DN69022_c0_g1_i1;TRINITY_DN69048_c0_g1_i1;TRINITY_DN69811_c0_g2_i1;TRINITY_DN70682_c0_g1_i1;TRINITY_DN70871_c0_g1_i1;TRINITY_DN71256_c4_g1_i1;TRINITY_DN72423_c0_g1_i1;TRINITY_DN72423_c1_g1_i2;TRINITY_DN72570_c0_g1_i6;TRINITY_DN73728_c4_g1_i1;TRINITY_DN73792_c0_g1_i3…	http://amigo.geneontology.org/amigo/term/GO:0097305	BP	64
GO:0070887	cellular response to chemical stimulus	90/740	1987/21795	0.00289278	0.112818	TRINITY_DN15130_c1_g1_i1;TRINITY_DN57153_c0_g1_i1;TRINITY_DN64892_c0_g1_i1;TRINITY_DN66576_c0_g1_i2;TRINITY_DN67988_c0_g1_i1;TRINITY_DN68559_c0_g1_i2;TRINITY_DN68780_c0_g2_i2;TRINITY_DN69048_c0_g1_i1;TRINITY_DN69285_c0_g1_i1;TRINITY_DN69811_c0_g2_i1;TRINITY_DN70602_c0_g1_i1;TRINITY_DN70602_c0_g2_i1;TRINITY_DN70682_c0_g1_i1;TRINITY_DN70721_c0_g5_i1;TRINITY_DN70721_c0_g9_i2;TRINITY_DN71392_c0_g1_i7…	http://amigo.geneontology.org/amigo/term/GO:0070887	BP	90
GO:0002213	defense response to insect	11/740	123/21795	0.00315787	0.12061	TRINITY_DN72627_c2_g1_i3;TRINITY_DN73332_c4_g2_i2;TRINITY_DN78300_c2_g8_i1;TRINITY_DN79255_c2_g3_i2;TRINITY_DN83068_c1_g1_i1;TRINITY_DN85192_c0_g2_i3;TRINITY_DN88648_c1_g2_i3;TRINITY_DN89843_c3_g1_i1;TRINITY_DN89843_c3_g2_i3;TRINITY_DN91072_c0_g4_i4;TRINITY_DN96995_c4_g4_i1	http://amigo.geneontology.org/amigo/term/GO:0002213	BP	11
GO:0016246	RNA interference	12/740	142/21795	0.00334876	0.123904	TRINITY_DN68559_c0_g1_i2;TRINITY_DN70135_c0_g2_i3;TRINITY_DN77123_c1_g2_i8;TRINITY_DN77451_c0_g4_i1;TRINITY_DN81280_c0_g1_i1;TRINITY_DN84723_c0_g4_i1;TRINITY_DN85827_c2_g1_i4;TRINITY_DN86585_c0_g1_i8;TRINITY_DN88658_c1_g3_i5;TRINITY_DN92796_c5_g1_i1;TRINITY_DN93493_c1_g2_i5;TRINITY_DN215683_c0_g1_i1	http://amigo.geneontology.org/amigo/term/GO:0016246	BP	12
GO:0032502	developmental process	215/740	5391/21795	0.00360358	0.129999	TRINITY_DN15130_c1_g1_i1;TRINITY_DN19531_c0_g1_i1;TRINITY_DN43850_c0_g1_i1;TRINITY_DN47904_c0_g1_i1;TRINITY_DN62427_c0_g1_i1;TRINITY_DN62693_c0_g1_i1;TRINITY_DN63938_c0_g1_i1;TRINITY_DN64333_c0_g1_i2;TRINITY_DN65523_c0_g1_i1;TRINITY_DN66001_c0_g1_i2;TRINITY_DN67020_c0_g1_i1;TRINITY_DN67047_c0_g1_i1;TRINITY_DN67350_c0_g1_i1;TRINITY_DN67782_c0_g1_i1;TRINITY_DN67876_c0_g1_i2;TRINITY_DN67970_c1_g1_i1…	http://amigo.geneontology.org/amigo/term/GO:0032502	BP	215
GO:0009718	anthocyanin-containing compound biosynthetic process	7/740	59/21795	0.00372275	0.13264	TRINITY_DN72482_c0_g2_i1;TRINITY_DN85132_c3_g1_i3;TRINITY_DN85524_c1_g2_i6;TRINITY_DN87659_c0_g1_i4;TRINITY_DN91241_c1_g1_i1;TRINITY_DN94631_c2_g1_i2;TRINITY_DN94631_c2_g7_i1	http://amigo.geneontology.org/amigo/term/GO:0009718	BP	7
GO:0071396	cellular response to lipid	25/740	411/21795	0.00379701	0.132947	TRINITY_DN15130_c1_g1_i1;TRINITY_DN57153_c0_g1_i1;TRINITY_DN66576_c0_g1_i2;TRINITY_DN68780_c0_g2_i2;TRINITY_DN69048_c0_g1_i1;TRINITY_DN69811_c0_g2_i1;TRINITY_DN71392_c0_g1_i7;TRINITY_DN71536_c0_g1_i2;TRINITY_DN71536_c0_g2_i4;TRINITY_DN72570_c0_g1_i6;TRINITY_DN74399_c0_g2_i2;TRINITY_DN75152_c3_g2_i1;TRINITY_DN76129_c4_g2_i1;TRINITY_DN77570_c2_g2_i2;TRINITY_DN78368_c1_g5_i1;TRINITY_DN79488_c1_g6_i1…	http://amigo.geneontology.org/amigo/term/GO:0071396	BP	25
GO:0048513	animal organ development	102/740	2321/21795	0.00384041	0.132947	TRINITY_DN43850_c0_g1_i1;TRINITY_DN47904_c0_g1_i1;TRINITY_DN62693_c0_g1_i1;TRINITY_DN67020_c0_g1_i1;TRINITY_DN67047_c0_g1_i1;TRINITY_DN67350_c0_g1_i1;TRINITY_DN67782_c0_g1_i1;TRINITY_DN68418_c0_g1_i1;TRINITY_DN68775_c1_g1_i1;TRINITY_DN68924_c0_g3_i1;TRINITY_DN69811_c0_g2_i1;TRINITY_DN69993_c2_g2_i1;TRINITY_DN70135_c0_g2_i3;TRINITY_DN70539_c0_g1_i1;TRINITY_DN71355_c0_g1_i1;TRINITY_DN71392_c0_g1_i7…	http://amigo.geneontology.org/amigo/term/GO:0048513	BP	102
GO:0071249	cellular response to nitrate	3/740	10/21795	0.00391205	0.132947	TRINITY_DN73821_c5_g2_i1;TRINITY_DN89850_c5_g1_i3;TRINITY_DN91622_c0_g2_i1	http://amigo.geneontology.org/amigo/term/GO:0071249	BP	3
GO:0009555	pollen development	31/740	548/21795	0.00407024	0.13659	TRINITY_DN65523_c0_g1_i1;TRINITY_DN67350_c0_g1_i1;TRINITY_DN71247_c1_g1_i1;TRINITY_DN71355_c0_g1_i1;TRINITY_DN72627_c2_g1_i3;TRINITY_DN73585_c1_g5_i1;TRINITY_DN73742_c1_g2_i2;TRINITY_DN75645_c0_g3_i1;TRINITY_DN77207_c2_g1_i3;TRINITY_DN79655_c3_g2_i3;TRINITY_DN80171_c4_g1_i2;TRINITY_DN85193_c1_g1_i5;TRINITY_DN85978_c1_g1_i9;TRINITY_DN86085_c5_g1_i3;TRINITY_DN86620_c1_g4_i2;TRINITY_DN86620_c1_g3_i5…	http://amigo.geneontology.org/amigo/term/GO:0009555	BP	31
GO:0050665	hydrogen peroxide biosynthetic process	4/740	20/21795	0.00413727	0.137243	TRINITY_DN77283_c0_g1_i4;TRINITY_DN77283_c0_g5_i1;TRINITY_DN78565_c0_g1_i1;TRINITY_DN81627_c2_g1_i12	http://amigo.geneontology.org/amigo/term/GO:0050665	BP	4
GO:0010252	auxin homeostasis	5/740	32/21795	0.0041882	0.137354	TRINITY_DN67876_c0_g1_i2;TRINITY_DN70602_c0_g1_i1;TRINITY_DN70602_c0_g2_i1;TRINITY_DN82697_c2_g3_i1;TRINITY_DN92040_c0_g1_i11	http://amigo.geneontology.org/amigo/term/GO:0010252	BP	5
GO:0071446	cellular response to salicylic acid stimulus	15/740	205/21795	0.00445429	0.144439	TRINITY_DN70721_c0_g5_i1;TRINITY_DN70721_c0_g9_i2;TRINITY_DN73594_c1_g1_i2;TRINITY_DN74753_c0_g1_i1;TRINITY_DN78300_c2_g8_i1;TRINITY_DN79255_c2_g3_i2;TRINITY_DN79971_c0_g2_i4;TRINITY_DN82278_c3_g5_i1;TRINITY_DN83068_c1_g1_i1;TRINITY_DN84755_c2_g5_i3;TRINITY_DN85192_c0_g2_i3;TRINITY_DN88648_c1_g2_i3;TRINITY_DN89843_c3_g1_i1;TRINITY_DN89843_c3_g2_i3;TRINITY_DN96995_c4_g4_i1	http://amigo.geneontology.org/amigo/term/GO:0071446	BP	15
GO:0007275	multicellular organism development	195/740	4861/21795	0.0046062	0.146623	TRINITY_DN15130_c1_g1_i1;TRINITY_DN19531_c0_g1_i1;TRINITY_DN43850_c0_g1_i1;TRINITY_DN47904_c0_g1_i1;TRINITY_DN62427_c0_g1_i1;TRINITY_DN62693_c0_g1_i1;TRINITY_DN63938_c0_g1_i1;TRINITY_DN64333_c0_g1_i2;TRINITY_DN65523_c0_g1_i1;TRINITY_DN66001_c0_g1_i2;TRINITY_DN67020_c0_g1_i1;TRINITY_DN67047_c0_g1_i1;TRINITY_DN67350_c0_g1_i1;TRINITY_DN67782_c0_g1_i1;TRINITY_DN67876_c0_g1_i2;TRINITY_DN67970_c1_g1_i1…	http://amigo.geneontology.org/amigo/term/GO:0007275	BP	195
GO:0009625	response to insect	12/740	148/21795	0.00467602	0.146623	TRINITY_DN72627_c2_g1_i3;TRINITY_DN73332_c4_g2_i2;TRINITY_DN78300_c2_g8_i1;TRINITY_DN78565_c0_g1_i1;TRINITY_DN79255_c2_g3_i2;TRINITY_DN83068_c1_g1_i1;TRINITY_DN85192_c0_g2_i3;TRINITY_DN88648_c1_g2_i3;TRINITY_DN89843_c3_g1_i1;TRINITY_DN89843_c3_g2_i3;TRINITY_DN91072_c0_g4_i4;TRINITY_DN96995_c4_g4_i1	http://amigo.geneontology.org/amigo/term/GO:0009625	BP	12
GO:0044275	cellular carbohydrate catabolic process	12/740	148/21795	0.00467602	0.146623	TRINITY_DN42865_c0_g1_i2;TRINITY_DN68994_c0_g1_i2;TRINITY_DN69811_c0_g2_i1;TRINITY_DN76717_c5_g1_i1;TRINITY_DN81193_c0_g2_i4;TRINITY_DN81193_c0_g1_i3;TRINITY_DN82953_c1_g1_i7;TRINITY_DN89202_c1_g2_i1;TRINITY_DN89202_c1_g4_i1;TRINITY_DN89202_c1_g5_i1;TRINITY_DN89202_c1_g6_i3;TRINITY_DN94133_c0_g1_i8	http://amigo.geneontology.org/amigo/term/GO:0044275	BP	12
GO:0009753	response to jasmonic acid	29/740	508/21795	0.00472486	0.146623	TRINITY_DN64892_c0_g1_i1;TRINITY_DN66170_c0_g1_i1;TRINITY_DN67988_c0_g1_i1;TRINITY_DN70871_c0_g1_i1;TRINITY_DN72127_c0_g4_i3;TRINITY_DN73792_c0_g1_i3;TRINITY_DN74753_c0_g1_i1;TRINITY_DN77590_c0_g5_i1;TRINITY_DN77590_c0_g8_i1;TRINITY_DN78980_c2_g2_i3;TRINITY_DN82128_c1_g2_i2;TRINITY_DN83157_c6_g4_i1;TRINITY_DN85439_c1_g1_i2;TRINITY_DN85524_c1_g2_i6;TRINITY_DN86357_c6_g4_i1;TRINITY_DN86927_c4_g1_i2…	http://amigo.geneontology.org/amigo/term/GO:0009753	BP	29
GO:0007033	vacuole organization	10/740	112/21795	0.00483187	0.148349	TRINITY_DN74186_c0_g1_i3;TRINITY_DN75000_c0_g2_i3;TRINITY_DN81011_c0_g2_i4;TRINITY_DN83913_c3_g5_i1;TRINITY_DN85524_c1_g2_i6;TRINITY_DN91241_c1_g1_i1;TRINITY_DN91981_c0_g3_i2;TRINITY_DN92028_c1_g2_i1;TRINITY_DN94631_c2_g1_i2;TRINITY_DN94631_c2_g7_i1	http://amigo.geneontology.org/amigo/term/GO:0007033	BP	10
GO:0010267	production of ta-siRNAs involved in RNA interference	7/740	62/21795	0.00491874	0.149426	TRINITY_DN68559_c0_g1_i2;TRINITY_DN77451_c0_g4_i1;TRINITY_DN81280_c0_g1_i1;TRINITY_DN85827_c2_g1_i4;TRINITY_DN86585_c0_g1_i8;TRINITY_DN93493_c1_g2_i5;TRINITY_DN215683_c0_g1_i1	http://amigo.geneontology.org/amigo/term/GO:0010267	BP	7
GO:0006468	protein phosphorylation	45/740	888/21795	0.00504316	0.15161	TRINITY_DN67047_c0_g1_i1;TRINITY_DN69048_c0_g1_i1;TRINITY_DN72421_c2_g4_i3;TRINITY_DN72538_c0_g1_i2;TRINITY_DN72765_c0_g1_i1;TRINITY_DN73594_c1_g1_i2;TRINITY_DN74399_c0_g2_i2;TRINITY_DN74802_c4_g3_i1;TRINITY_DN74828_c0_g1_i1;TRINITY_DN77419_c0_g1_i10;TRINITY_DN77570_c2_g2_i2;TRINITY_DN78565_c0_g1_i1;TRINITY_DN79341_c3_g2_i1;TRINITY_DN79458_c0_g1_i8;TRINITY_DN79601_c8_g1_i4;TRINITY_DN79589_c0_g1_i…	http://amigo.geneontology.org/amigo/term/GO:0006468	BP	45
GO:0015698	inorganic anion transport	13/740	169/21795	0.00517249	0.153895	TRINITY_DN70525_c3_g2_i1;TRINITY_DN73821_c5_g2_i1;TRINITY_DN74250_c0_g1_i1;TRINITY_DN79540_c0_g3_i4;TRINITY_DN80116_c1_g2_i8;TRINITY_DN81637_c4_g2_i1;TRINITY_DN82945_c0_g2_i4;TRINITY_DN88582_c7_g2_i10;TRINITY_DN91375_c1_g1_i2;TRINITY_DN91622_c0_g2_i1;TRINITY_DN91622_c0_g1_i2;TRINITY_DN93749_c0_g1_i3;TRINITY_DN96785_c0_g1_i6	http://amigo.geneontology.org/amigo/term/GO:0015698	BP	13
GO:0016560	protein import into peroxisome matrix, docking	2/740	4/21795	0.00659976	0.17636	TRINITY_DN89072_c0_g1_i1;TRINITY_DN92311_c0_g4_i4	http://amigo.geneontology.org/amigo/term/GO:0016560	BP	2
GO:0072489	methylammonium transmembrane transport	2/740	4/21795	0.00659976	0.17636	TRINITY_DN67293_c0_g1_i2;TRINITY_DN83281_c0_g1_i3	http://amigo.geneontology.org/amigo/term/GO:0072489	BP	2
GO:0009964	negative regulation of flavonoid biosynthetic process	3/740	12/21795	0.00681748	0.178866	TRINITY_DN76557_c0_g2_i4;TRINITY_DN76557_c0_g5_i1;TRINITY_DN91602_c1_g2_i4	http://amigo.geneontology.org/amigo/term/GO:0009964	BP	3
GO:0036290	protein trans-autophosphorylation	3/740	12/21795	0.00681748	0.178866	TRINITY_DN67047_c0_g1_i1;TRINITY_DN72765_c0_g1_i1;TRINITY_DN81281_c4_g1_i1	http://amigo.geneontology.org/amigo/term/GO:0036290	BP	3
GO:0010089	xylem development	5/740	36/21795	0.00701536	0.179171	TRINITY_DN72838_c0_g1_i11;TRINITY_DN74175_c1_g3_i2;TRINITY_DN75510_c0_g5_i4;TRINITY_DN89614_c0_g3_i2;TRINITY_DN94961_c1_g4_i1	http://amigo.geneontology.org/amigo/term/GO:0010089	BP	5
GO:0046283	anthocyanin-containing compound metabolic process	7/740	67/21795	0.00752466	0.190493	TRINITY_DN72482_c0_g2_i1;TRINITY_DN85132_c3_g1_i3;TRINITY_DN85524_c1_g2_i6;TRINITY_DN87659_c0_g1_i4;TRINITY_DN91241_c1_g1_i1;TRINITY_DN94631_c2_g1_i2;TRINITY_DN94631_c2_g7_i1	http://amigo.geneontology.org/amigo/term/GO:0046283	BP	7
GO:0015706	nitrate transport	4/740	24/21795	0.00815078	0.201053	TRINITY_DN73821_c5_g2_i1;TRINITY_DN74250_c0_g1_i1;TRINITY_DN91622_c0_g2_i1;TRINITY_DN91622_c0_g1_i2	http://amigo.geneontology.org/amigo/term/GO:0015706	BP	4
GO:0046244	salicylic acid catabolic process	3/740	13/21795	0.00864144	0.207827	TRINITY_DN65523_c0_g1_i1;TRINITY_DN89554_c1_g1_i1;TRINITY_DN90326_c0_g1_i5	http://amigo.geneontology.org/amigo/term/GO:0046244	BP	3
GO:0019221	cytokine-mediated signaling pathway	3/740	13/21795	0.00864144	0.207827	TRINITY_DN80224_c0_g2_i1;TRINITY_DN86288_c3_g4_i1;TRINITY_DN94190_c2_g1_i20	http://amigo.geneontology.org/amigo/term/GO:0019221	BP	3
GO:0005987	sucrose catabolic process	3/740	13/21795	0.00864144	0.207827	TRINITY_DN42865_c0_g1_i2;TRINITY_DN82953_c1_g1_i7;TRINITY_DN94133_c0_g1_i8	http://amigo.geneontology.org/amigo/term/GO:0005987	BP	3
GO:0048545	response to steroid hormone	9/740	104/21795	0.00893091	0.211267	TRINITY_DN15130_c1_g1_i1;TRINITY_DN69048_c0_g1_i1;TRINITY_DN72570_c0_g1_i6;TRINITY_DN74399_c0_g2_i2;TRINITY_DN75152_c3_g2_i1;TRINITY_DN78368_c1_g5_i1;TRINITY_DN79601_c8_g1_i4;TRINITY_DN87382_c0_g1_i2;TRINITY_DN88654_c0_g2_i8	http://amigo.geneontology.org/amigo/term/GO:0048545	BP	9
GO:0009416	response to light stimulus	56/740	1195/21795	0.00926394	0.213609	TRINITY_DN19531_c0_g1_i1;TRINITY_DN58158_c0_g1_i1;TRINITY_DN64333_c0_g1_i2;TRINITY_DN65523_c0_g1_i1;TRINITY_DN67782_c0_g1_i1;TRINITY_DN68780_c0_g2_i2;TRINITY_DN69285_c0_g1_i1;TRINITY_DN70135_c0_g2_i3;TRINITY_DN70433_c0_g1_i3;TRINITY_DN70433_c0_g6_i1;TRINITY_DN70602_c0_g1_i1;TRINITY_DN70602_c0_g2_i1;TRINITY_DN71317_c1_g1_i3;TRINITY_DN71723_c2_g1_i1;TRINITY_DN72971_c0_g1_i3;TRINITY_DN73033_c0_g3_i1…	http://amigo.geneontology.org/amigo/term/GO:0009416	BP	56
GO:0010376	stomatal complex formation	4/740	25/21795	0.00944735	0.213609	TRINITY_DN77419_c0_g1_i10;TRINITY_DN80331_c0_g6_i1;TRINITY_DN83949_c1_g2_i2;TRINITY_DN89459_c0_g1_i5	http://amigo.geneontology.org/amigo/term/GO:0010376	BP	4
GO:0016441	posttranscriptional gene silencing	14/740	204/21795	0.0101041	0.213609	TRINITY_DN68559_c0_g1_i2;TRINITY_DN70135_c0_g2_i3;TRINITY_DN71200_c0_g1_i3;TRINITY_DN77123_c1_g2_i8;TRINITY_DN77451_c0_g4_i1;TRINITY_DN81280_c0_g1_i1;TRINITY_DN84723_c0_g4_i1;TRINITY_DN85827_c2_g1_i4;TRINITY_DN86585_c0_g1_i8;TRINITY_DN88658_c1_g3_i5;TRINITY_DN92454_c3_g1_i1;TRINITY_DN92796_c5_g1_i1;TRINITY_DN93493_c1_g2_i5;TRINITY_DN215683_c0_g1_i1	http://amigo.geneontology.org/amigo/term/GO:0016441	BP	14
GO:0032501	multicellular organismal process	202/740	5148/21795	0.0101191	0.213609	TRINITY_DN15130_c1_g1_i1;TRINITY_DN19531_c0_g1_i1;TRINITY_DN43850_c0_g1_i1;TRINITY_DN47904_c0_g1_i1;TRINITY_DN62427_c0_g1_i1;TRINITY_DN62693_c0_g1_i1;TRINITY_DN63938_c0_g1_i1;TRINITY_DN64333_c0_g1_i2;TRINITY_DN65523_c0_g1_i1;TRINITY_DN66001_c0_g1_i2;TRINITY_DN67020_c0_g1_i1;TRINITY_DN67047_c0_g1_i1;TRINITY_DN67350_c0_g1_i1;TRINITY_DN67782_c0_g1_i1;TRINITY_DN67876_c0_g1_i2;TRINITY_DN67970_c1_g1_i1…	http://amigo.geneontology.org/amigo/term/GO:0032501	BP	202
GO:0048316	seed development	50/740	1051/21795	0.0103954	0.213609	TRINITY_DN63938_c0_g1_i1;TRINITY_DN64333_c0_g1_i2;TRINITY_DN67020_c0_g1_i1;TRINITY_DN68775_c1_g1_i1;TRINITY_DN69811_c0_g2_i1;TRINITY_DN70135_c0_g2_i3;TRINITY_DN70539_c0_g1_i1;TRINITY_DN71012_c0_g1_i1;TRINITY_DN71200_c0_g1_i3;TRINITY_DN73326_c0_g1_i1;TRINITY_DN73326_c0_g3_i3;TRINITY_DN73883_c1_g1_i1;TRINITY_DN73973_c3_g2_i1;TRINITY_DN74175_c1_g3_i2;TRINITY_DN75645_c0_g3_i1;TRINITY_DN76233_c0_g1_i1…	http://amigo.geneontology.org/amigo/term/GO:0048316	BP	50
GO:0048856	anatomical structure development	194/740	4929/21795	0.010546	0.213609	TRINITY_DN19531_c0_g1_i1;TRINITY_DN43850_c0_g1_i1;TRINITY_DN47904_c0_g1_i1;TRINITY_DN62693_c0_g1_i1;TRINITY_DN63938_c0_g1_i1;TRINITY_DN64333_c0_g1_i2;TRINITY_DN65523_c0_g1_i1;TRINITY_DN66001_c0_g1_i2;TRINITY_DN67020_c0_g1_i1;TRINITY_DN67047_c0_g1_i1;TRINITY_DN67350_c0_g1_i1;TRINITY_DN67782_c0_g1_i1;TRINITY_DN68418_c0_g1_i1;TRINITY_DN68780_c0_g2_i2;TRINITY_DN68775_c1_g1_i1;TRINITY_DN68815_c0_g1_i1…	http://amigo.geneontology.org/amigo/term/GO:0048856	BP	194
GO:0009737	response to abscisic acid	52/740	1103/21795	0.0106965	0.213609	TRINITY_DN42865_c0_g1_i2;TRINITY_DN66576_c0_g1_i2;TRINITY_DN68559_c0_g1_i2;TRINITY_DN68780_c0_g2_i2;TRINITY_DN69022_c0_g1_i1;TRINITY_DN69811_c0_g2_i1;TRINITY_DN70682_c0_g1_i1;TRINITY_DN70871_c0_g1_i1;TRINITY_DN71256_c4_g1_i1;TRINITY_DN73728_c4_g1_i1;TRINITY_DN73792_c0_g1_i3;TRINITY_DN73998_c2_g4_i4;TRINITY_DN74802_c4_g3_i1;TRINITY_DN75808_c2_g1_i1;TRINITY_DN77570_c2_g2_i2;TRINITY_DN77953_c1_g1_i1…	http://amigo.geneontology.org/amigo/term/GO:0009737	BP	52
GO:0046274	lignin catabolic process	3/740	14/21795	0.0107241	0.213609	TRINITY_DN65523_c0_g1_i1;TRINITY_DN89554_c1_g1_i1;TRINITY_DN90326_c0_g1_i5	http://amigo.geneontology.org/amigo/term/GO:0046274	BP	3
GO:0009828	plant-type cell wall loosening	3/740	14/21795	0.0107241	0.213609	TRINITY_DN68971_c0_g1_i1;TRINITY_DN77500_c3_g6_i1;TRINITY_DN91863_c1_g3_i1	http://amigo.geneontology.org/amigo/term/GO:0009828	BP	3
GO:0071383	cellular response to steroid hormone stimulus	8/740	89/21795	0.0107353	0.213609	TRINITY_DN15130_c1_g1_i1;TRINITY_DN69048_c0_g1_i1;TRINITY_DN72570_c0_g1_i6;TRINITY_DN74399_c0_g2_i2;TRINITY_DN75152_c3_g2_i1;TRINITY_DN78368_c1_g5_i1;TRINITY_DN79601_c8_g1_i4;TRINITY_DN87382_c0_g1_i2	http://amigo.geneontology.org/amigo/term/GO:0071383	BP	8
GO:1902170	cellular response to reactive nitrogen species	4/740	26/21795	0.0108709	0.213609	TRINITY_DN73821_c5_g2_i1;TRINITY_DN79971_c0_g2_i4;TRINITY_DN89850_c5_g1_i3;TRINITY_DN91622_c0_g2_i1	http://amigo.geneontology.org/amigo/term/GO:1902170	BP	4
GO:0046148	pigment biosynthetic process	14/740	206/21795	0.0109455	0.213609	TRINITY_DN72482_c0_g2_i1;TRINITY_DN74311_c0_g3_i13;TRINITY_DN79615_c0_g4_i2;TRINITY_DN80750_c0_g2_i6;TRINITY_DN84703_c6_g1_i1;TRINITY_DN85132_c3_g1_i3;TRINITY_DN85524_c1_g2_i6;TRINITY_DN87659_c0_g1_i4;TRINITY_DN91241_c1_g1_i1;TRINITY_DN91252_c1_g2_i4;TRINITY_DN93991_c2_g2_i5;TRINITY_DN93991_c3_g1_i3;TRINITY_DN94631_c2_g1_i2;TRINITY_DN94631_c2_g7_i1	http://amigo.geneontology.org/amigo/term/GO:0046148	BP	14
GO:0009646	response to absence of light	5/740	41/21795	0.0121428	0.232081	TRINITY_DN70433_c0_g1_i3;TRINITY_DN70433_c0_g6_i1;TRINITY_DN71723_c2_g1_i1;TRINITY_DN87364_c0_g3_i1;TRINITY_DN92577_c0_g1_i5	http://amigo.geneontology.org/amigo/term/GO:0009646	BP	5
GO:0010154	fruit development	51/740	1090/21795	0.0130187	0.24585	TRINITY_DN63938_c0_g1_i1;TRINITY_DN64333_c0_g1_i2;TRINITY_DN67020_c0_g1_i1;TRINITY_DN68775_c1_g1_i1;TRINITY_DN69811_c0_g2_i1;TRINITY_DN70135_c0_g2_i3;TRINITY_DN70539_c0_g1_i1;TRINITY_DN71012_c0_g1_i1;TRINITY_DN71200_c0_g1_i3;TRINITY_DN72627_c2_g1_i3;TRINITY_DN73326_c0_g1_i1;TRINITY_DN73326_c0_g3_i3;TRINITY_DN73883_c1_g1_i1;TRINITY_DN73973_c3_g2_i1;TRINITY_DN74175_c1_g3_i2;TRINITY_DN75645_c0_g3_i1…	http://amigo.geneontology.org/amigo/term/GO:0010154	BP	51
GO:0046271	phenylpropanoid catabolic process	3/740	15/21795	0.0130716	0.24585	TRINITY_DN65523_c0_g1_i1;TRINITY_DN89554_c1_g1_i1;TRINITY_DN90326_c0_g1_i5	http://amigo.geneontology.org/amigo/term/GO:0046271	BP	3
GO:0010035	response to inorganic substance	107/740	2560/21795	0.0131188	0.24585	TRINITY_DN63681_c0_g1_i1;TRINITY_DN65230_c0_g2_i1;TRINITY_DN65523_c0_g1_i1;TRINITY_DN65778_c0_g1_i1;TRINITY_DN66297_c0_g1_i1;TRINITY_DN68780_c0_g2_i2;TRINITY_DN69285_c0_g1_i1;TRINITY_DN69811_c0_g2_i1;TRINITY_DN70698_c0_g1_i4;TRINITY_DN70682_c0_g1_i1;TRINITY_DN70801_c0_g1_i6;TRINITY_DN70801_c0_g2_i1;TRINITY_DN71012_c0_g1_i1;TRINITY_DN71256_c4_g1_i1;TRINITY_DN71323_c1_g3_i5;TRINITY_DN71631_c0_g3_i5…	http://amigo.geneontology.org/amigo/term/GO:0010035	BP	107
GO:0010310	regulation of hydrogen peroxide metabolic process	10/740	130/21795	0.0132794	0.247253	TRINITY_DN78300_c2_g8_i1;TRINITY_DN78503_c0_g1_i2;TRINITY_DN79255_c2_g3_i2;TRINITY_DN83068_c1_g1_i1;TRINITY_DN84755_c2_g5_i3;TRINITY_DN85192_c0_g2_i3;TRINITY_DN88648_c1_g2_i3;TRINITY_DN89843_c3_g1_i1;TRINITY_DN89843_c3_g2_i3;TRINITY_DN96995_c4_g4_i1	http://amigo.geneontology.org/amigo/term/GO:0010310	BP	10
GO:0031537	regulation of anthocyanin metabolic process	6/740	58/21795	0.0135902	0.251419	TRINITY_DN53892_c1_g1_i1;TRINITY_DN77590_c0_g5_i1;TRINITY_DN77590_c0_g8_i1;TRINITY_DN94747_c1_g1_i2;TRINITY_DN94747_c1_g4_i2;TRINITY_DN96704_c2_g1_i1	http://amigo.geneontology.org/amigo/term/GO:0031537	BP	6
GO:0051606	detection of stimulus	10/740	131/21795	0.0139551	0.252586	TRINITY_DN50025_c0_g1_i1;TRINITY_DN65230_c0_g2_i1;TRINITY_DN73152_c1_g3_i1;TRINITY_DN74828_c0_g1_i1;TRINITY_DN75702_c2_g1_i1;TRINITY_DN75772_c1_g2_i5;TRINITY_DN78565_c0_g1_i1;TRINITY_DN78762_c0_g4_i13;TRINITY_DN80224_c0_g2_i1;TRINITY_DN94882_c0_g4_i1	http://amigo.geneontology.org/amigo/term/GO:0051606	BP	10
GO:0009314	response to radiation	57/740	1248/21795	0.0141076	0.252586	TRINITY_DN19531_c0_g1_i1;TRINITY_DN58158_c0_g1_i1;TRINITY_DN64333_c0_g1_i2;TRINITY_DN65523_c0_g1_i1;TRINITY_DN67782_c0_g1_i1;TRINITY_DN68780_c0_g2_i2;TRINITY_DN69285_c0_g1_i1;TRINITY_DN70135_c0_g2_i3;TRINITY_DN70433_c0_g1_i3;TRINITY_DN70433_c0_g6_i1;TRINITY_DN70602_c0_g1_i1;TRINITY_DN70602_c0_g2_i1;TRINITY_DN71317_c1_g1_i3;TRINITY_DN71723_c2_g1_i1;TRINITY_DN72971_c0_g1_i3;TRINITY_DN73033_c0_g3_i1…	http://amigo.geneontology.org/amigo/term/GO:0009314	BP	57
GO:2001252	positive regulation of chromosome organization	4/740	28/21795	0.0141158	0.252586	TRINITY_DN66001_c0_g1_i2;TRINITY_DN79180_c4_g2_i1;TRINITY_DN80224_c0_g2_i1;TRINITY_DN90636_c0_g1_i7	http://amigo.geneontology.org/amigo/term/GO:2001252	BP	4
GO:0009696	salicylic acid metabolic process	4/740	28/21795	0.0141158	0.252586	TRINITY_DN65523_c0_g1_i1;TRINITY_DN78503_c0_g1_i2;TRINITY_DN89554_c1_g1_i1;TRINITY_DN90326_c0_g1_i5	http://amigo.geneontology.org/amigo/term/GO:0009696	BP	4
GO:0048229	gametophyte development	37/740	746/21795	0.0141784	0.252586	TRINITY_DN65523_c0_g1_i1;TRINITY_DN67350_c0_g1_i1;TRINITY_DN71247_c1_g1_i1;TRINITY_DN71355_c0_g1_i1;TRINITY_DN72627_c2_g1_i3;TRINITY_DN73585_c1_g5_i1;TRINITY_DN73742_c1_g2_i2;TRINITY_DN75645_c0_g3_i1;TRINITY_DN77207_c2_g1_i3;TRINITY_DN78441_c2_g1_i5;TRINITY_DN79458_c0_g1_i8;TRINITY_DN79655_c3_g2_i3;TRINITY_DN80171_c4_g1_i2;TRINITY_DN82632_c1_g2_i2;TRINITY_DN85193_c1_g1_i5;TRINITY_DN85978_c1_g1_i9…	http://amigo.geneontology.org/amigo/term/GO:0048229	BP	37
GO:0010103	stomatal complex morphogenesis	6/740	59/21795	0.0147073	0.255694	TRINITY_DN47904_c0_g1_i1;TRINITY_DN77419_c0_g1_i10;TRINITY_DN80331_c0_g6_i1;TRINITY_DN83949_c1_g2_i2;TRINITY_DN84017_c0_g8_i1;TRINITY_DN89459_c0_g1_i5	http://amigo.geneontology.org/amigo/term/GO:0010103	BP	6
GO:0035194	posttranscriptional gene silencing by RNA	13/740	193/21795	0.0148648	0.255997	TRINITY_DN68559_c0_g1_i2;TRINITY_DN70135_c0_g2_i3;TRINITY_DN77123_c1_g2_i8;TRINITY_DN77451_c0_g4_i1;TRINITY_DN81280_c0_g1_i1;TRINITY_DN84723_c0_g4_i1;TRINITY_DN85827_c2_g1_i4;TRINITY_DN86585_c0_g1_i8;TRINITY_DN88658_c1_g3_i5;TRINITY_DN92454_c3_g1_i1;TRINITY_DN92796_c5_g1_i1;TRINITY_DN93493_c1_g2_i5;TRINITY_DN215683_c0_g1_i1	http://amigo.geneontology.org/amigo/term/GO:0035194	BP	13
GO:1901698	response to nitrogen compound	30/740	579/21795	0.0149568	0.255997	TRINITY_DN68559_c0_g1_i2;TRINITY_DN72290_c0_g2_i2;TRINITY_DN72423_c0_g1_i1;TRINITY_DN72423_c1_g1_i2;TRINITY_DN73821_c5_g2_i1;TRINITY_DN74250_c0_g1_i1;TRINITY_DN77123_c1_g2_i8;TRINITY_DN77451_c0_g4_i1;TRINITY_DN79602_c0_g1_i2;TRINITY_DN79971_c0_g2_i4;TRINITY_DN81280_c0_g1_i1;TRINITY_DN81698_c0_g3_i1;TRINITY_DN84723_c0_g4_i1;TRINITY_DN85827_c2_g1_i4;TRINITY_DN86354_c1_g6_i1;TRINITY_DN86354_c1_g1_i2…	http://amigo.geneontology.org/amigo/term/GO:1901698	BP	30
GO:0009819	drought recovery	3/740	16/21795	0.0156887	0.260878	TRINITY_DN65523_c0_g1_i1;TRINITY_DN89554_c1_g1_i1;TRINITY_DN90326_c0_g1_i5	http://amigo.geneontology.org/amigo/term/GO:0009819	BP	3
GO:0016572	histone phosphorylation	3/740	16/21795	0.0156887	0.260878	TRINITY_DN72421_c2_g4_i3;TRINITY_DN79589_c0_g1_i2;TRINITY_DN80892_c0_g1_i6	http://amigo.geneontology.org/amigo/term/GO:0016572	BP	3
GO:0043617	cellular response to sucrose starvation	2/740	6/21795	0.015768	0.260878	TRINITY_DN71723_c2_g1_i1;TRINITY_DN92577_c0_g1_i5	http://amigo.geneontology.org/amigo/term/GO:0043617	BP	2
GO:0009653	anatomical structure morphogenesis	82/740	1909/21795	0.015819	0.260878	TRINITY_DN43850_c0_g1_i1;TRINITY_DN47904_c0_g1_i1;TRINITY_DN62693_c0_g1_i1;TRINITY_DN67350_c0_g1_i1;TRINITY_DN67782_c0_g1_i1;TRINITY_DN68815_c0_g1_i1;TRINITY_DN68971_c0_g1_i1;TRINITY_DN69048_c0_g1_i1;TRINITY_DN69073_c2_g1_i1;TRINITY_DN69993_c2_g2_i1;TRINITY_DN70135_c0_g2_i3;TRINITY_DN70539_c0_g1_i1;TRINITY_DN70602_c0_g1_i1;TRINITY_DN70602_c0_g2_i1;TRINITY_DN71355_c0_g1_i1;TRINITY_DN71772_c1_g1_i1…	http://amigo.geneontology.org/amigo/term/GO:0009653	BP	82
GO:0031540	regulation of anthocyanin biosynthetic process	5/740	44/21795	0.0162002	0.264686	TRINITY_DN77590_c0_g5_i1;TRINITY_DN77590_c0_g8_i1;TRINITY_DN94747_c1_g1_i2;TRINITY_DN94747_c1_g4_i2;TRINITY_DN96704_c2_g1_i1	http://amigo.geneontology.org/amigo/term/GO:0031540	BP	5
GO:0009863	salicylic acid mediated signaling pathway	13/740	196/21795	0.0166932	0.269142	TRINITY_DN70721_c0_g5_i1;TRINITY_DN70721_c0_g9_i2;TRINITY_DN73594_c1_g1_i2;TRINITY_DN78300_c2_g8_i1;TRINITY_DN79255_c2_g3_i2;TRINITY_DN82278_c3_g5_i1;TRINITY_DN83068_c1_g1_i1;TRINITY_DN84755_c2_g5_i3;TRINITY_DN85192_c0_g2_i3;TRINITY_DN88648_c1_g2_i3;TRINITY_DN89843_c3_g1_i1;TRINITY_DN89843_c3_g2_i3;TRINITY_DN96995_c4_g4_i1	http://amigo.geneontology.org/amigo/term/GO:0009863	BP	13
GO:0010618	aerenchyma formation	9/740	116/21795	0.0173878	0.277686	TRINITY_DN78300_c2_g8_i1;TRINITY_DN79255_c2_g3_i2;TRINITY_DN83068_c1_g1_i1;TRINITY_DN84755_c2_g5_i3;TRINITY_DN85192_c0_g2_i3;TRINITY_DN88648_c1_g2_i3;TRINITY_DN89843_c3_g1_i1;TRINITY_DN89843_c3_g2_i3;TRINITY_DN96995_c4_g4_i1	http://amigo.geneontology.org/amigo/term/GO:0010618	BP	9
GO:0009809	lignin biosynthetic process	8/740	98/21795	0.0183972	0.288265	TRINITY_DN74169_c0_g7_i1;TRINITY_DN77728_c3_g4_i1;TRINITY_DN80750_c0_g2_i6;TRINITY_DN83499_c1_g7_i1;TRINITY_DN87396_c1_g2_i6;TRINITY_DN89937_c1_g9_i1;TRINITY_DN93991_c2_g2_i5;TRINITY_DN93991_c3_g1_i3	http://amigo.geneontology.org/amigo/term/GO:0009809	BP	8
GO:0048508	embryonic meristem development	8/740	98/21795	0.0183972	0.288265	TRINITY_DN68775_c1_g1_i1;TRINITY_DN73973_c3_g2_i1;TRINITY_DN74175_c1_g3_i2;TRINITY_DN84005_c0_g1_i6;TRINITY_DN86200_c0_g1_i3;TRINITY_DN89614_c0_g3_i2;TRINITY_DN94961_c1_g4_i1;TRINITY_DN96349_c3_g13_i1	http://amigo.geneontology.org/amigo/term/GO:0048508	BP	8
GO:0051782	negative regulation of cell division	3/740	17/21795	0.0185784	0.288265	TRINITY_DN67047_c0_g1_i1;TRINITY_DN72765_c0_g1_i1;TRINITY_DN81281_c4_g1_i1	http://amigo.geneontology.org/amigo/term/GO:0051782	BP	3
GO:0019222	regulation of metabolic process	145/740	3637/21795	0.0189934	0.293128	TRINITY_DN53892_c1_g1_i1;TRINITY_DN62693_c0_g1_i1;TRINITY_DN65799_c0_g1_i3;TRINITY_DN65780_c0_g1_i2;TRINITY_DN66001_c0_g1_i2;TRINITY_DN66576_c0_g1_i2;TRINITY_DN67132_c0_g1_i1;TRINITY_DN67350_c0_g1_i1;TRINITY_DN67712_c0_g1_i2;TRINITY_DN68539_c0_g1_i1;TRINITY_DN68559_c0_g1_i2;TRINITY_DN68780_c0_g2_i2;TRINITY_DN68775_c1_g1_i1;TRINITY_DN68815_c0_g1_i1;TRINITY_DN68924_c0_g3_i1;TRINITY_DN69537_c0_g2_i1…	http://amigo.geneontology.org/amigo/term/GO:0019222	BP	145
GO:0015791	polyol transport	4/740	31/21795	0.0200314	0.300839	TRINITY_DN67443_c0_g1_i2;TRINITY_DN71157_c0_g3_i1;TRINITY_DN76628_c0_g1_i1;TRINITY_DN91375_c1_g1_i2	http://amigo.geneontology.org/amigo/term/GO:0015791	BP	4
GO:1901699	cellular response to nitrogen compound	17/740	289/21795	0.0204264	0.300839	TRINITY_DN68559_c0_g1_i2;TRINITY_DN73821_c5_g2_i1;TRINITY_DN77123_c1_g2_i8;TRINITY_DN77451_c0_g4_i1;TRINITY_DN79971_c0_g2_i4;TRINITY_DN81280_c0_g1_i1;TRINITY_DN84723_c0_g4_i1;TRINITY_DN85827_c2_g1_i4;TRINITY_DN86585_c0_g1_i8;TRINITY_DN86907_c3_g4_i3;TRINITY_DN88658_c1_g3_i5;TRINITY_DN89850_c5_g1_i3;TRINITY_DN91622_c0_g2_i1;TRINITY_DN92454_c3_g1_i1;TRINITY_DN92796_c5_g1_i1;TRINITY_DN93493_c1_g2_i5…	http://amigo.geneontology.org/amigo/term/GO:1901699	BP	17
GO:0009624	response to nematode	14/740	223/21795	0.0204921	0.300839	TRINITY_DN62427_c0_g1_i1;TRINITY_DN70640_c1_g1_i2;TRINITY_DN80886_c0_g5_i2;TRINITY_DN82761_c0_g1_i6;TRINITY_DN83973_c3_g1_i1;TRINITY_DN83973_c3_g2_i4;TRINITY_DN85813_c5_g1_i1;TRINITY_DN88185_c5_g5_i3;TRINITY_DN88917_c3_g2_i1;TRINITY_DN91984_c3_g1_i5;TRINITY_DN91981_c0_g3_i2;TRINITY_DN93348_c0_g3_i1;TRINITY_DN94246_c6_g1_i2;TRINITY_DN95545_c3_g3_i11	http://amigo.geneontology.org/amigo/term/GO:0009624	BP	14
GO:0031047	gene silencing by RNA	14/740	223/21795	0.0204921	0.300839	TRINITY_DN68559_c0_g1_i2;TRINITY_DN70135_c0_g2_i3;TRINITY_DN77123_c1_g2_i8;TRINITY_DN77451_c0_g4_i1;TRINITY_DN78441_c2_g1_i5;TRINITY_DN81280_c0_g1_i1;TRINITY_DN84723_c0_g4_i1;TRINITY_DN85827_c2_g1_i4;TRINITY_DN86585_c0_g1_i8;TRINITY_DN88658_c1_g3_i5;TRINITY_DN92454_c3_g1_i1;TRINITY_DN92796_c5_g1_i1;TRINITY_DN93493_c1_g2_i5;TRINITY_DN215683_c0_g1_i1	http://amigo.geneontology.org/amigo/term/GO:0031047	BP	14
GO:0048528	post-embryonic root development	15/740	245/21795	0.0206397	0.300839	TRINITY_DN69811_c0_g2_i1;TRINITY_DN73792_c0_g1_i3;TRINITY_DN73821_c5_g2_i1;TRINITY_DN75510_c0_g5_i4;TRINITY_DN78637_c1_g1_i3;TRINITY_DN81443_c1_g2_i6;TRINITY_DN81698_c0_g3_i1;TRINITY_DN85439_c1_g1_i2;TRINITY_DN89072_c0_g1_i1;TRINITY_DN89850_c5_g1_i3;TRINITY_DN91622_c0_g2_i1;TRINITY_DN91622_c0_g1_i2;TRINITY_DN92311_c0_g4_i4;TRINITY_DN92912_c1_g4_i1;TRINITY_DN114980_c0_g1_i1	http://amigo.geneontology.org/amigo/term/GO:0048528	BP	15
GO:0015843	methylammonium transport	2/740	7/21795	0.0215826	0.306835	TRINITY_DN67293_c0_g1_i2;TRINITY_DN83281_c0_g1_i3	http://amigo.geneontology.org/amigo/term/GO:0015843	BP	2
GO:0043987	histone H3-S10 phosphorylation	2/740	7/21795	0.0215826	0.306835	TRINITY_DN79589_c0_g1_i2;TRINITY_DN80892_c0_g1_i6	http://amigo.geneontology.org/amigo/term/GO:0043987	BP	2
GO:0035404	histone-serine phosphorylation	2/740	7/21795	0.0215826	0.306835	TRINITY_DN79589_c0_g1_i2;TRINITY_DN80892_c0_g1_i6	http://amigo.geneontology.org/amigo/term/GO:0035404	BP	2
GO:0032456	endocytic recycling	2/740	7/21795	0.0215826	0.306835	TRINITY_DN68282_c0_g1_i1;TRINITY_DN73631_c1_g2_i1	http://amigo.geneontology.org/amigo/term/GO:0032456	BP	2
GO:0006959	humoral immune response	2/740	7/21795	0.0215826	0.306835	TRINITY_DN71239_c1_g1_i7;TRINITY_DN94190_c2_g1_i20	http://amigo.geneontology.org/amigo/term/GO:0006959	BP	2
GO:0035279	mRNA cleavage involved in gene silencing by miRNA	3/740	18/21795	0.0217426	0.307594	TRINITY_DN68559_c0_g1_i2;TRINITY_DN86585_c0_g1_i8;TRINITY_DN92796_c5_g1_i1	http://amigo.geneontology.org/amigo/term/GO:0035279	BP	3
GO:0048527	lateral root development	14/740	225/21795	0.0219338	0.307859	TRINITY_DN69811_c0_g2_i1;TRINITY_DN73792_c0_g1_i3;TRINITY_DN73821_c5_g2_i1;TRINITY_DN75510_c0_g5_i4;TRINITY_DN78637_c1_g1_i3;TRINITY_DN81443_c1_g2_i6;TRINITY_DN81698_c0_g3_i1;TRINITY_DN85439_c1_g1_i2;TRINITY_DN89072_c0_g1_i1;TRINITY_DN89850_c5_g1_i3;TRINITY_DN91622_c0_g2_i1;TRINITY_DN91622_c0_g1_i2;TRINITY_DN92311_c0_g4_i4;TRINITY_DN114980_c0_g1_i1	http://amigo.geneontology.org/amigo/term/GO:0048527	BP	14
GO:0065007	biological regulation	254/740	6729/21795	0.0220738	0.307859	TRINITY_DN15130_c1_g1_i1;TRINITY_DN43850_c0_g1_i1;TRINITY_DN53892_c1_g1_i1;TRINITY_DN57153_c0_g1_i1;TRINITY_DN62693_c0_g1_i1;TRINITY_DN64892_c0_g1_i1;TRINITY_DN65230_c0_g2_i1;TRINITY_DN65799_c0_g1_i3;TRINITY_DN65780_c0_g1_i2;TRINITY_DN66001_c0_g1_i2;TRINITY_DN66576_c0_g1_i2;TRINITY_DN67020_c0_g1_i1;TRINITY_DN67047_c0_g1_i1;TRINITY_DN67132_c0_g1_i1;TRINITY_DN67350_c0_g1_i1;TRINITY_DN67712_c0_g1_i2…	http://amigo.geneontology.org/amigo/term/GO:0065007	BP	254
GO:0009791	post-embryonic development	105/740	2558/21795	0.022179	0.307859	TRINITY_DN19531_c0_g1_i1;TRINITY_DN47904_c0_g1_i1;TRINITY_DN62693_c0_g1_i1;TRINITY_DN63938_c0_g1_i1;TRINITY_DN64333_c0_g1_i2;TRINITY_DN66001_c0_g1_i2;TRINITY_DN67020_c0_g1_i1;TRINITY_DN67047_c0_g1_i1;TRINITY_DN67350_c0_g1_i1;TRINITY_DN67782_c0_g1_i1;TRINITY_DN67970_c1_g1_i1;TRINITY_DN68780_c0_g2_i2;TRINITY_DN68775_c1_g1_i1;TRINITY_DN69048_c0_g1_i1;TRINITY_DN69497_c0_g1_i2;TRINITY_DN69811_c0_g2_i1…	http://amigo.geneontology.org/amigo/term/GO:0009791	BP	105
GO:0042214	terpene metabolic process	4/740	32/21795	0.0222947	0.307859	TRINITY_DN71536_c0_g1_i2;TRINITY_DN71536_c0_g2_i4;TRINITY_DN73481_c7_g1_i1;TRINITY_DN73693_c0_g3_i2	http://amigo.geneontology.org/amigo/term/GO:0042214	BP	4
GO:0046352	disaccharide catabolic process	4/740	32/21795	0.0222947	0.307859	TRINITY_DN42865_c0_g1_i2;TRINITY_DN76717_c5_g1_i1;TRINITY_DN82953_c1_g1_i7;TRINITY_DN94133_c0_g1_i8	http://amigo.geneontology.org/amigo/term/GO:0046352	BP	4
GO:0042592	homeostatic process	32/740	648/21795	0.0226524	0.311309	TRINITY_DN66576_c0_g1_i2;TRINITY_DN67876_c0_g1_i2;TRINITY_DN68418_c0_g1_i1;TRINITY_DN70602_c0_g1_i1;TRINITY_DN70602_c0_g2_i1;TRINITY_DN70640_c1_g1_i2;TRINITY_DN74269_c0_g3_i1;TRINITY_DN74269_c0_g1_i10;TRINITY_DN76232_c4_g1_i1;TRINITY_DN77751_c2_g5_i2;TRINITY_DN78762_c0_g4_i13;TRINITY_DN79180_c4_g2_i1;TRINITY_DN80593_c0_g6_i1;TRINITY_DN81530_c0_g1_i6;TRINITY_DN81627_c2_g1_i12;TRINITY_DN81807_c4_g1…	http://amigo.geneontology.org/amigo/term/GO:0042592	BP	32
GO:0005985	sucrose metabolic process	6/740	65/21795	0.0227686	0.311422	TRINITY_DN42865_c0_g1_i2;TRINITY_DN70263_c0_g1_i2;TRINITY_DN78940_c0_g4_i2;TRINITY_DN82953_c1_g1_i7;TRINITY_DN91657_c1_g7_i1;TRINITY_DN94133_c0_g1_i8	http://amigo.geneontology.org/amigo/term/GO:0005985	BP	6
GO:0009755	hormone-mediated signaling pathway	39/740	823/21795	0.0231281	0.314499	TRINITY_DN15130_c1_g1_i1;TRINITY_DN57153_c0_g1_i1;TRINITY_DN64892_c0_g1_i1;TRINITY_DN67988_c0_g1_i1;TRINITY_DN68780_c0_g2_i2;TRINITY_DN69048_c0_g1_i1;TRINITY_DN69811_c0_g2_i1;TRINITY_DN70602_c0_g1_i1;TRINITY_DN70602_c0_g2_i1;TRINITY_DN70682_c0_g1_i1;TRINITY_DN71392_c0_g1_i7;TRINITY_DN71536_c0_g1_i2;TRINITY_DN71536_c0_g2_i4;TRINITY_DN72421_c2_g4_i3;TRINITY_DN72570_c0_g1_i6;TRINITY_DN73594_c1_g1_i2…	http://amigo.geneontology.org/amigo/term/GO:0009755	BP	39
GO:0009694	jasmonic acid metabolic process	9/740	122/21795	0.0233205	0.314499	TRINITY_DN72627_c2_g1_i3;TRINITY_DN78068_c2_g3_i2;TRINITY_DN81414_c3_g3_i6;TRINITY_DN82128_c1_g2_i2;TRINITY_DN84013_c3_g1_i1;TRINITY_DN88823_c0_g3_i1;TRINITY_DN89895_c2_g2_i1;TRINITY_DN89895_c2_g5_i6;TRINITY_DN95473_c1_g4_i1	http://amigo.geneontology.org/amigo/term/GO:0009694	BP	9
GO:0009742	brassinosteroid mediated signaling pathway	7/740	84/21795	0.0240323	0.316699	TRINITY_DN15130_c1_g1_i1;TRINITY_DN69048_c0_g1_i1;TRINITY_DN72570_c0_g1_i6;TRINITY_DN74399_c0_g2_i2;TRINITY_DN78368_c1_g5_i1;TRINITY_DN79601_c8_g1_i4;TRINITY_DN87382_c0_g1_i2	http://amigo.geneontology.org/amigo/term/GO:0009742	BP	7
GO:0043401	steroid hormone mediated signaling pathway	7/740	84/21795	0.0240323	0.316699	TRINITY_DN15130_c1_g1_i1;TRINITY_DN69048_c0_g1_i1;TRINITY_DN72570_c0_g1_i6;TRINITY_DN74399_c0_g2_i2;TRINITY_DN78368_c1_g5_i1;TRINITY_DN79601_c8_g1_i4;TRINITY_DN87382_c0_g1_i2	http://amigo.geneontology.org/amigo/term/GO:0043401	BP	7
GO:0071367	cellular response to brassinosteroid stimulus	7/740	84/21795	0.0240323	0.316699	TRINITY_DN15130_c1_g1_i1;TRINITY_DN69048_c0_g1_i1;TRINITY_DN72570_c0_g1_i6;TRINITY_DN74399_c0_g2_i2;TRINITY_DN78368_c1_g5_i1;TRINITY_DN79601_c8_g1_i4;TRINITY_DN87382_c0_g1_i2	http://amigo.geneontology.org/amigo/term/GO:0071367	BP	7
GO:0048878	chemical homeostasis	28/740	554/21795	0.0243267	0.319121	TRINITY_DN66576_c0_g1_i2;TRINITY_DN67876_c0_g1_i2;TRINITY_DN68418_c0_g1_i1;TRINITY_DN70602_c0_g1_i1;TRINITY_DN70602_c0_g2_i1;TRINITY_DN70640_c1_g1_i2;TRINITY_DN74269_c0_g3_i1;TRINITY_DN74269_c0_g1_i10;TRINITY_DN76232_c4_g1_i1;TRINITY_DN77751_c2_g5_i2;TRINITY_DN78762_c0_g4_i13;TRINITY_DN81530_c0_g1_i6;TRINITY_DN81627_c2_g1_i12;TRINITY_DN81807_c4_g1_i3;TRINITY_DN82697_c2_g3_i1;TRINITY_DN83913_c3_g5…	http://amigo.geneontology.org/amigo/term/GO:0048878	BP	28
GO:0007154	cell communication	92/740	2219/21795	0.0251623	0.32739	TRINITY_DN15130_c1_g1_i1;TRINITY_DN57153_c0_g1_i1;TRINITY_DN64892_c0_g1_i1;TRINITY_DN65230_c0_g2_i1;TRINITY_DN67988_c0_g1_i1;TRINITY_DN68780_c0_g2_i2;TRINITY_DN69048_c0_g1_i1;TRINITY_DN69285_c0_g1_i1;TRINITY_DN69811_c0_g2_i1;TRINITY_DN70525_c3_g2_i1;TRINITY_DN70602_c0_g1_i1;TRINITY_DN70602_c0_g2_i1;TRINITY_DN70682_c0_g1_i1;TRINITY_DN70721_c0_g5_i1;TRINITY_DN70721_c0_g9_i2;TRINITY_DN71392_c0_g1_i7…	http://amigo.geneontology.org/amigo/term/GO:0007154	BP	92
GO:0009415	response to water	32/740	654/21795	0.0253548	0.328135	TRINITY_DN65523_c0_g1_i1;TRINITY_DN68780_c0_g2_i2;TRINITY_DN69285_c0_g1_i1;TRINITY_DN69811_c0_g2_i1;TRINITY_DN70698_c0_g1_i4;TRINITY_DN70682_c0_g1_i1;TRINITY_DN70801_c0_g1_i6;TRINITY_DN70801_c0_g2_i1;TRINITY_DN71256_c4_g1_i1;TRINITY_DN71631_c0_g3_i5;TRINITY_DN72144_c3_g1_i1;TRINITY_DN72290_c0_g2_i2;TRINITY_DN73998_c2_g4_i4;TRINITY_DN74250_c0_g1_i1;TRINITY_DN78940_c0_g4_i2;TRINITY_DN79330_c2_g2_i5…	http://amigo.geneontology.org/amigo/term/GO:0009415	BP	32
GO:0010224	response to UV-B	11/740	166/21795	0.0264953	0.341364	TRINITY_DN65523_c0_g1_i1;TRINITY_DN75913_c2_g1_i8;TRINITY_DN77590_c0_g5_i1;TRINITY_DN77590_c0_g8_i1;TRINITY_DN82735_c0_g4_i1;TRINITY_DN89151_c0_g1_i9;TRINITY_DN89554_c1_g1_i1;TRINITY_DN90326_c0_g1_i5;TRINITY_DN94747_c1_g1_i2;TRINITY_DN94747_c1_g4_i2;TRINITY_DN96704_c2_g1_i1	http://amigo.geneontology.org/amigo/term/GO:0010224	BP	11
GO:0009647	skotomorphogenesis	3/740	20/21795	0.0288955	0.345027	TRINITY_DN70433_c0_g1_i3;TRINITY_DN70433_c0_g6_i1;TRINITY_DN87364_c0_g3_i1	http://amigo.geneontology.org/amigo/term/GO:0009647	BP	3
GO:0009627	systemic acquired resistance	15/740	256/21795	0.0290726	0.345027	TRINITY_DN70721_c0_g5_i1;TRINITY_DN70721_c0_g9_i2;TRINITY_DN73594_c1_g1_i2;TRINITY_DN78300_c2_g8_i1;TRINITY_DN79255_c2_g3_i2;TRINITY_DN79971_c0_g2_i4;TRINITY_DN82278_c3_g5_i1;TRINITY_DN83068_c1_g1_i1;TRINITY_DN84755_c2_g5_i3;TRINITY_DN85192_c0_g2_i3;TRINITY_DN86907_c3_g4_i3;TRINITY_DN88648_c1_g2_i3;TRINITY_DN89843_c3_g1_i1;TRINITY_DN89843_c3_g2_i3;TRINITY_DN96995_c4_g4_i1	http://amigo.geneontology.org/amigo/term/GO:0009627	BP	15
GO:0009311	oligosaccharide metabolic process	15/740	257/21795	0.0299491	0.345027	TRINITY_DN42865_c0_g1_i2;TRINITY_DN70263_c0_g1_i2;TRINITY_DN76717_c5_g1_i1;TRINITY_DN78940_c0_g4_i2;TRINITY_DN81193_c0_g2_i4;TRINITY_DN81193_c0_g1_i3;TRINITY_DN82953_c1_g1_i7;TRINITY_DN86638_c3_g6_i2;TRINITY_DN89202_c1_g2_i1;TRINITY_DN89202_c1_g4_i1;TRINITY_DN89202_c1_g5_i1;TRINITY_DN89202_c1_g6_i3;TRINITY_DN91657_c1_g7_i1;TRINITY_DN93786_c0_g2_i1;TRINITY_DN94133_c0_g1_i8	http://amigo.geneontology.org/amigo/term/GO:0009311	BP	15
GO:0010150	leaf senescence	12/740	191/21795	0.0302625	0.345027	TRINITY_DN68418_c0_g1_i1;TRINITY_DN78300_c2_g8_i1;TRINITY_DN79255_c2_g3_i2;TRINITY_DN83068_c1_g1_i1;TRINITY_DN85192_c0_g2_i3;TRINITY_DN87282_c0_g3_i2;TRINITY_DN88648_c1_g2_i3;TRINITY_DN89843_c3_g1_i1;TRINITY_DN89843_c3_g2_i3;TRINITY_DN90160_c3_g2_i7;TRINITY_DN90160_c3_g1_i13;TRINITY_DN96995_c4_g4_i1	http://amigo.geneontology.org/amigo/term/GO:0010150	BP	12
GO:0009593	detection of chemical stimulus	5/740	52/21795	0.0311351	0.345027	TRINITY_DN65230_c0_g2_i1;TRINITY_DN75772_c1_g2_i5;TRINITY_DN78565_c0_g1_i1;TRINITY_DN78762_c0_g4_i13;TRINITY_DN94882_c0_g4_i1	http://amigo.geneontology.org/amigo/term/GO:0009593	BP	5
GO:0042743	hydrogen peroxide metabolic process	6/740	70/21795	0.0314149	0.345027	TRINITY_DN77283_c0_g1_i4;TRINITY_DN77283_c0_g5_i1;TRINITY_DN78565_c0_g1_i1;TRINITY_DN81627_c2_g1_i12;TRINITY_DN90204_c2_g3_i5;TRINITY_DN95935_c2_g1_i2	http://amigo.geneontology.org/amigo/term/GO:0042743	BP	6
GO:0010208	pollen wall assembly	7/740	89/21795	0.0316964	0.345027	TRINITY_DN73585_c1_g5_i1;TRINITY_DN85193_c1_g1_i5;TRINITY_DN86085_c5_g1_i3;TRINITY_DN86620_c1_g4_i2;TRINITY_DN86620_c1_g3_i5;TRINITY_DN96833_c1_g1_i8;TRINITY_DN212533_c0_g1_i1	http://amigo.geneontology.org/amigo/term/GO:0010208	BP	7
GO:0009629	response to gravity	11/740	171/21795	0.0319646	0.345027	TRINITY_DN77590_c0_g5_i1;TRINITY_DN77590_c0_g8_i1;TRINITY_DN81011_c0_g2_i4;TRINITY_DN82697_c2_g3_i1;TRINITY_DN82731_c0_g4_i2;TRINITY_DN89409_c1_g3_i3;TRINITY_DN90446_c3_g2_i3;TRINITY_DN90446_c3_g4_i1;TRINITY_DN94747_c1_g1_i2;TRINITY_DN94747_c1_g4_i2;TRINITY_DN96704_c2_g1_i1	http://amigo.geneontology.org/amigo/term/GO:0009629	BP	11
GO:0006950	response to stress	220/740	5816/21795	0.0322479	0.345027	TRINITY_DN15130_c1_g1_i1;TRINITY_DN43850_c0_g1_i1;TRINITY_DN50025_c0_g1_i1;TRINITY_DN53892_c1_g1_i1;TRINITY_DN63938_c0_g1_i1;TRINITY_DN64333_c0_g1_i2;TRINITY_DN65523_c0_g1_i1;TRINITY_DN65768_c0_g1_i1;TRINITY_DN66170_c0_g1_i1;TRINITY_DN67443_c0_g1_i2;TRINITY_DN67782_c0_g1_i1;TRINITY_DN67891_c0_g1_i1;TRINITY_DN68780_c0_g2_i2;TRINITY_DN69022_c0_g1_i1;TRINITY_DN69285_c0_g1_i1;TRINITY_DN69362_c0_g1_i2…	http://amigo.geneontology.org/amigo/term/GO:0006950	BP	220
GO:0097306	cellular response to alcohol	18/740	329/21795	0.0327495	0.345027	TRINITY_DN15130_c1_g1_i1;TRINITY_DN66576_c0_g1_i2;TRINITY_DN68780_c0_g2_i2;TRINITY_DN69048_c0_g1_i1;TRINITY_DN69811_c0_g2_i1;TRINITY_DN72570_c0_g1_i6;TRINITY_DN74399_c0_g2_i2;TRINITY_DN77570_c2_g2_i2;TRINITY_DN78368_c1_g5_i1;TRINITY_DN79488_c1_g6_i1;TRINITY_DN79601_c8_g1_i4;TRINITY_DN80442_c2_g1_i2;TRINITY_DN81627_c2_g1_i12;TRINITY_DN81757_c2_g1_i6;TRINITY_DN82498_c1_g5_i1;TRINITY_DN87382_c0_g1_i…	http://amigo.geneontology.org/amigo/term/GO:0097306	BP	18
GO:0010345	suberin biosynthetic process	4/740	36/21795	0.0328616	0.345027	TRINITY_DN69553_c0_g1_i1;TRINITY_DN91524_c0_g3_i2;TRINITY_DN91524_c0_g4_i2;TRINITY_DN94463_c0_g1_i3	http://amigo.geneontology.org/amigo/term/GO:0010345	BP	4
GO:0016045	detection of bacterium	3/740	21/21795	0.0328823	0.345027	TRINITY_DN50025_c0_g1_i1;TRINITY_DN74828_c0_g1_i1;TRINITY_DN75702_c2_g1_i1	http://amigo.geneontology.org/amigo/term/GO:0016045	BP	3
GO:0009414	response to water deprivation	31/740	644/21795	0.0331671	0.345027	TRINITY_DN65523_c0_g1_i1;TRINITY_DN68780_c0_g2_i2;TRINITY_DN69285_c0_g1_i1;TRINITY_DN69811_c0_g2_i1;TRINITY_DN70698_c0_g1_i4;TRINITY_DN70682_c0_g1_i1;TRINITY_DN70801_c0_g1_i6;TRINITY_DN70801_c0_g2_i1;TRINITY_DN71256_c4_g1_i1;TRINITY_DN71631_c0_g3_i5;TRINITY_DN72144_c3_g1_i1;TRINITY_DN72290_c0_g2_i2;TRINITY_DN73998_c2_g4_i4;TRINITY_DN74250_c0_g1_i1;TRINITY_DN78940_c0_g4_i2;TRINITY_DN79330_c2_g2_i5…	http://amigo.geneontology.org/amigo/term/GO:0009414	BP	31
GO:0007625	grooming behavior	1/740	1/21795	0.0339527	0.345027	TRINITY_DN80224_c0_g2_i1	http://amigo.geneontology.org/amigo/term/GO:0007625	BP	1
GO:0007629	flight behavior	1/740	1/21795	0.0339527	0.345027	TRINITY_DN80224_c0_g2_i1	http://amigo.geneontology.org/amigo/term/GO:0007629	BP	1
GO:0035878	nail development	1/740	1/21795	0.0339527	0.345027	TRINITY_DN94190_c2_g1_i20	http://amigo.geneontology.org/amigo/term/GO:0035878	BP	1
GO:0071356	cellular response to tumor necrosis factor	1/740	1/21795	0.0339527	0.345027	TRINITY_DN94190_c2_g1_i20	http://amigo.geneontology.org/amigo/term/GO:0071356	BP	1
GO:0006956	complement activation	1/740	1/21795	0.0339527	0.345027	TRINITY_DN94190_c2_g1_i20	http://amigo.geneontology.org/amigo/term/GO:0006956	BP	1
GO:0071364	cellular response to epidermal growth factor stimulus	1/740	1/21795	0.0339527	0.345027	TRINITY_DN75152_c3_g2_i1	http://amigo.geneontology.org/amigo/term/GO:0071364	BP	1
GO:1900111	positive regulation of histone H3-K9 dimethylation	1/740	1/21795	0.0339527	0.345027	TRINITY_DN66001_c0_g1_i2	http://amigo.geneontology.org/amigo/term/GO:1900111	BP	1
GO:0045214	sarcomere organization	1/740	1/21795	0.0339527	0.345027	TRINITY_DN94190_c2_g1_i20	http://amigo.geneontology.org/amigo/term/GO:0045214	BP	1
GO:0031424	keratinization	1/740	1/21795	0.0339527	0.345027	TRINITY_DN94190_c2_g1_i20	http://amigo.geneontology.org/amigo/term/GO:0031424	BP	1
GO:1900109	regulation of histone H3-K9 dimethylation	1/740	1/21795	0.0339527	0.345027	TRINITY_DN66001_c0_g1_i2	http://amigo.geneontology.org/amigo/term/GO:1900109	BP	1
GO:0031157	regulation of aggregate size involved in sorocarp development	1/740	1/21795	0.0339527	0.345027	TRINITY_DN75000_c0_g2_i3	http://amigo.geneontology.org/amigo/term/GO:0031157	BP	1
GO:0097435	supramolecular fiber organization	1/740	1/21795	0.0339527	0.345027	TRINITY_DN75152_c3_g2_i1	http://amigo.geneontology.org/amigo/term/GO:0097435	BP	1
GO:0080006	internode patterning	1/740	1/21795	0.0339527	0.345027	TRINITY_DN85755_c0_g3_i1	http://amigo.geneontology.org/amigo/term/GO:0080006	BP	1
GO:0033209	tumor necrosis factor-mediated signaling pathway	1/740	1/21795	0.0339527	0.345027	TRINITY_DN94190_c2_g1_i20	http://amigo.geneontology.org/amigo/term/GO:0033209	BP	1
GO:0051599	response to hydrostatic pressure	1/740	1/21795	0.0339527	0.345027	TRINITY_DN94190_c2_g1_i20	http://amigo.geneontology.org/amigo/term/GO:0051599	BP	1
GO:0070849	response to epidermal growth factor	1/740	1/21795	0.0339527	0.345027	TRINITY_DN75152_c3_g2_i1	http://amigo.geneontology.org/amigo/term/GO:0070849	BP	1
GO:0060862	negative regulation of floral organ abscission	1/740	1/21795	0.0339527	0.345027	TRINITY_DN91119_c1_g1_i2	http://amigo.geneontology.org/amigo/term/GO:0060862	BP	1
GO:0001867	complement activation, lectin pathway	1/740	1/21795	0.0339527	0.345027	TRINITY_DN94190_c2_g1_i20	http://amigo.geneontology.org/amigo/term/GO:0001867	BP	1
GO:1900030	regulation of pectin biosynthetic process	1/740	1/21795	0.0339527	0.345027	TRINITY_DN72127_c0_g4_i3	http://amigo.geneontology.org/amigo/term/GO:1900030	BP	1
GO:0045616	regulation of keratinocyte differentiation	1/740	1/21795	0.0339527	0.345027	TRINITY_DN94190_c2_g1_i20	http://amigo.geneontology.org/amigo/term/GO:0045616	BP	1
GO:0016339	calcium-dependent cell-cell adhesion via plasma membrane cell adhesion molecules	1/740	1/21795	0.0339527	0.345027	TRINITY_DN75000_c0_g2_i3	http://amigo.geneontology.org/amigo/term/GO:0016339	BP	1
GO:0033182	regulation of histone ubiquitination	1/740	1/21795	0.0339527	0.345027	TRINITY_DN80224_c0_g2_i1	http://amigo.geneontology.org/amigo/term/GO:0033182	BP	1
GO:0048016	inositol phosphate-mediated signaling	1/740	1/21795	0.0339527	0.345027	TRINITY_DN84005_c0_g1_i6	http://amigo.geneontology.org/amigo/term/GO:0048016	BP	1
GO:0034612	response to tumor necrosis factor	1/740	1/21795	0.0339527	0.345027	TRINITY_DN94190_c2_g1_i20	http://amigo.geneontology.org/amigo/term/GO:0034612	BP	1
GO:0048577	negative regulation of short-day photoperiodism, flowering	1/740	1/21795	0.0339527	0.345027	TRINITY_DN75500_c1_g1_i1	http://amigo.geneontology.org/amigo/term/GO:0048577	BP	1
GO:0060706	cell differentiation involved in embryonic placenta development	1/740	1/21795	0.0339527	0.345027	TRINITY_DN94190_c2_g1_i20	http://amigo.geneontology.org/amigo/term/GO:0060706	BP	1
GO:0007630	jump response	1/740	1/21795	0.0339527	0.345027	TRINITY_DN80224_c0_g2_i1	http://amigo.geneontology.org/amigo/term/GO:0007630	BP	1
GO:0071300	cellular response to retinoic acid	1/740	1/21795	0.0339527	0.345027	TRINITY_DN75152_c3_g2_i1	http://amigo.geneontology.org/amigo/term/GO:0071300	BP	1
GO:0070423	nucleotide-binding oligomerization domain containing signaling pathway	2/740	9/21795	0.0353729	0.352022	TRINITY_DN80224_c0_g2_i1;TRINITY_DN86288_c3_g4_i1	http://amigo.geneontology.org/amigo/term/GO:0070423	BP	2
GO:0009684	indoleacetic acid biosynthetic process	2/740	9/21795	0.0353729	0.352022	TRINITY_DN82731_c0_g4_i2;TRINITY_DN89409_c1_g3_i3	http://amigo.geneontology.org/amigo/term/GO:0009684	BP	2
GO:0060416	response to growth hormone	2/740	9/21795	0.0353729	0.352022	TRINITY_DN81698_c0_g3_i1;TRINITY_DN114980_c0_g1_i1	http://amigo.geneontology.org/amigo/term/GO:0060416	BP	2
GO:0010260	animal organ senescence	12/740	196/21795	0.0358561	0.355603	TRINITY_DN68418_c0_g1_i1;TRINITY_DN78300_c2_g8_i1;TRINITY_DN79255_c2_g3_i2;TRINITY_DN83068_c1_g1_i1;TRINITY_DN85192_c0_g2_i3;TRINITY_DN87282_c0_g3_i2;TRINITY_DN88648_c1_g2_i3;TRINITY_DN89843_c3_g1_i1;TRINITY_DN89843_c3_g2_i3;TRINITY_DN90160_c3_g2_i7;TRINITY_DN90160_c3_g1_i13;TRINITY_DN96995_c4_g4_i1	http://amigo.geneontology.org/amigo/term/GO:0010260	BP	12
GO:0042545	cell wall modification	10/740	153/21795	0.0361747	0.357535	TRINITY_DN66170_c0_g1_i1;TRINITY_DN68971_c0_g1_i1;TRINITY_DN74828_c0_g1_i1;TRINITY_DN77500_c3_g6_i1;TRINITY_DN78565_c0_g1_i1;TRINITY_DN83762_c2_g3_i1;TRINITY_DN86907_c3_g4_i3;TRINITY_DN87313_c1_g1_i9;TRINITY_DN88582_c7_g2_i10;TRINITY_DN91863_c1_g3_i1	http://amigo.geneontology.org/amigo/term/GO:0042545	BP	10
GO:0045229	external encapsulating structure organization	20/740	381/21795	0.0368807	0.360638	TRINITY_DN66170_c0_g1_i1;TRINITY_DN68971_c0_g1_i1;TRINITY_DN73585_c1_g5_i1;TRINITY_DN74830_c0_g1_i3;TRINITY_DN74828_c0_g1_i1;TRINITY_DN77500_c3_g6_i1;TRINITY_DN78565_c0_g1_i1;TRINITY_DN83762_c2_g3_i1;TRINITY_DN84017_c0_g8_i1;TRINITY_DN85193_c1_g1_i5;TRINITY_DN86085_c5_g1_i3;TRINITY_DN86620_c1_g4_i2;TRINITY_DN86620_c1_g3_i5;TRINITY_DN86907_c3_g4_i3;TRINITY_DN87313_c1_g1_i9;TRINITY_DN88582_c7_g2_i1…	http://amigo.geneontology.org/amigo/term/GO:0045229	BP	20
GO:0006379	mRNA cleavage	3/740	22/21795	0.0371395	0.360638	TRINITY_DN68559_c0_g1_i2;TRINITY_DN86585_c0_g1_i8;TRINITY_DN92796_c5_g1_i1	http://amigo.geneontology.org/amigo/term/GO:0006379	BP	3
GO:0009595	detection of biotic stimulus	3/740	22/21795	0.0371395	0.360638	TRINITY_DN50025_c0_g1_i1;TRINITY_DN74828_c0_g1_i1;TRINITY_DN75702_c2_g1_i1	http://amigo.geneontology.org/amigo/term/GO:0009595	BP	3
GO:0042440	pigment metabolic process	14/740	242/21795	0.0374169	0.361154	TRINITY_DN72482_c0_g2_i1;TRINITY_DN74311_c0_g3_i13;TRINITY_DN79615_c0_g4_i2;TRINITY_DN80750_c0_g2_i6;TRINITY_DN84703_c6_g1_i1;TRINITY_DN85132_c3_g1_i3;TRINITY_DN85524_c1_g2_i6;TRINITY_DN87659_c0_g1_i4;TRINITY_DN91241_c1_g1_i1;TRINITY_DN91252_c1_g2_i4;TRINITY_DN93991_c2_g2_i5;TRINITY_DN93991_c3_g1_i3;TRINITY_DN94631_c2_g1_i2;TRINITY_DN94631_c2_g7_i1	http://amigo.geneontology.org/amigo/term/GO:0042440	BP	14
GO:0051554	flavonol metabolic process	4/740	38/21795	0.039071	0.369702	TRINITY_DN80750_c0_g2_i6;TRINITY_DN91252_c1_g2_i4;TRINITY_DN93991_c2_g2_i5;TRINITY_DN93991_c3_g1_i3	http://amigo.geneontology.org/amigo/term/GO:0051554	BP	4
GO:0051553	flavone biosynthetic process	4/740	38/21795	0.039071	0.369702	TRINITY_DN80750_c0_g2_i6;TRINITY_DN91252_c1_g2_i4;TRINITY_DN93991_c2_g2_i5;TRINITY_DN93991_c3_g1_i3	http://amigo.geneontology.org/amigo/term/GO:0051553	BP	4
GO:0051555	flavonol biosynthetic process	4/740	38/21795	0.039071	0.369702	TRINITY_DN80750_c0_g2_i6;TRINITY_DN91252_c1_g2_i4;TRINITY_DN93991_c2_g2_i5;TRINITY_DN93991_c3_g1_i3	http://amigo.geneontology.org/amigo/term/GO:0051555	BP	4
GO:0051552	flavone metabolic process	4/740	38/21795	0.039071	0.369702	TRINITY_DN80750_c0_g2_i6;TRINITY_DN91252_c1_g2_i4;TRINITY_DN93991_c2_g2_i5;TRINITY_DN93991_c3_g1_i3	http://amigo.geneontology.org/amigo/term/GO:0051552	BP	4
GO:0010030	positive regulation of seed germination	4/740	38/21795	0.039071	0.369702	TRINITY_DN73294_c5_g2_i2;TRINITY_DN79447_c3_g1_i1;TRINITY_DN85344_c1_g3_i2;TRINITY_DN93504_c0_g1_i1	http://amigo.geneontology.org/amigo/term/GO:0010030	BP	4
GO:0015695	organic cation transport	4/740	38/21795	0.039071	0.369702	TRINITY_DN67293_c0_g1_i2;TRINITY_DN72170_c3_g8_i1;TRINITY_DN72170_c3_g9_i1;TRINITY_DN83281_c0_g1_i3	http://amigo.geneontology.org/amigo/term/GO:0015695	BP	4
GO:1901615	organic hydroxy compound metabolic process	25/740	505/21795	0.0393988	0.370375	TRINITY_DN43850_c0_g1_i1;TRINITY_DN64333_c0_g1_i2;TRINITY_DN65523_c0_g1_i1;TRINITY_DN68864_c0_g1_i6;TRINITY_DN69285_c0_g1_i1;TRINITY_DN75732_c1_g1_i6;TRINITY_DN78503_c0_g1_i2;TRINITY_DN79326_c0_g1_i1;TRINITY_DN80750_c0_g2_i6;TRINITY_DN83523_c1_g2_i2;TRINITY_DN83913_c3_g5_i1;TRINITY_DN84005_c0_g1_i6;TRINITY_DN85524_c1_g2_i6;TRINITY_DN89554_c1_g1_i1;TRINITY_DN90264_c0_g4_i2;TRINITY_DN90326_c0_g1_i5…	http://amigo.geneontology.org/amigo/term/GO:1901615	BP	25
GO:0010584	pollen exine formation	6/740	74/21795	0.0396944	0.371593	TRINITY_DN73585_c1_g5_i1;TRINITY_DN85193_c1_g1_i5;TRINITY_DN86620_c1_g4_i2;TRINITY_DN86620_c1_g3_i5;TRINITY_DN96833_c1_g1_i8;TRINITY_DN212533_c0_g1_i1	http://amigo.geneontology.org/amigo/term/GO:0010584	BP	6
GO:0009889	regulation of biosynthetic process	99/740	2459/21795	0.0403536	0.374778	TRINITY_DN62693_c0_g1_i1;TRINITY_DN65799_c0_g1_i3;TRINITY_DN65780_c0_g1_i2;TRINITY_DN66576_c0_g1_i2;TRINITY_DN67132_c0_g1_i1;TRINITY_DN67350_c0_g1_i1;TRINITY_DN67712_c0_g1_i2;TRINITY_DN68539_c0_g1_i1;TRINITY_DN68780_c0_g2_i2;TRINITY_DN68775_c1_g1_i1;TRINITY_DN68924_c0_g3_i1;TRINITY_DN69537_c0_g2_i1;TRINITY_DN69811_c0_g2_i1;TRINITY_DN70539_c0_g1_i1;TRINITY_DN70602_c0_g2_i1;TRINITY_DN70682_c0_g1_i1…	http://amigo.geneontology.org/amigo/term/GO:0009889	BP	99
GO:0040029	regulation of gene expression, epigenetic	20/740	385/21795	0.0403867	0.374778	TRINITY_DN68559_c0_g1_i2;TRINITY_DN70135_c0_g2_i3;TRINITY_DN71200_c0_g1_i3;TRINITY_DN76957_c0_g4_i4;TRINITY_DN77123_c1_g2_i8;TRINITY_DN77451_c0_g4_i1;TRINITY_DN78441_c2_g1_i5;TRINITY_DN80567_c0_g6_i1;TRINITY_DN80593_c0_g6_i1;TRINITY_DN81280_c0_g1_i1;TRINITY_DN84723_c0_g4_i1;TRINITY_DN85827_c2_g1_i4;TRINITY_DN86585_c0_g1_i8;TRINITY_DN88658_c1_g3_i5;TRINITY_DN89640_c2_g2_i2;TRINITY_DN92454_c3_g1_i1…	http://amigo.geneontology.org/amigo/term/GO:0040029	BP	20
GO:0010228	vegetative to reproductive phase transition of meristem	12/740	200/21795	0.0408305	0.376475	TRINITY_DN19531_c0_g1_i1;TRINITY_DN62693_c0_g1_i1;TRINITY_DN66001_c0_g1_i2;TRINITY_DN68780_c0_g2_i2;TRINITY_DN70433_c0_g1_i3;TRINITY_DN70433_c0_g6_i1;TRINITY_DN73287_c0_g1_i2;TRINITY_DN74875_c0_g2_i3;TRINITY_DN78441_c2_g1_i5;TRINITY_DN78980_c2_g2_i3;TRINITY_DN85755_c0_g3_i1;TRINITY_DN87364_c0_g3_i1	http://amigo.geneontology.org/amigo/term/GO:0010228	BP	12
GO:0001666	response to hypoxia	13/740	223/21795	0.0416082	0.376475	TRINITY_DN75177_c2_g3_i2;TRINITY_DN75772_c1_g2_i5;TRINITY_DN78300_c2_g8_i1;TRINITY_DN79255_c2_g3_i2;TRINITY_DN83068_c1_g1_i1;TRINITY_DN84755_c2_g5_i3;TRINITY_DN85192_c0_g2_i3;TRINITY_DN86288_c3_g4_i1;TRINITY_DN88648_c1_g2_i3;TRINITY_DN89843_c3_g1_i1;TRINITY_DN89843_c3_g2_i3;TRINITY_DN91657_c1_g7_i1;TRINITY_DN96995_c4_g4_i1	http://amigo.geneontology.org/amigo/term/GO:0001666	BP	13
GO:0006955	immune response	30/740	632/21795	0.0416165	0.376475	TRINITY_DN50025_c0_g1_i1;TRINITY_DN67443_c0_g1_i2;TRINITY_DN70135_c0_g2_i3;TRINITY_DN70721_c0_g5_i1;TRINITY_DN70721_c0_g9_i2;TRINITY_DN71239_c1_g1_i7;TRINITY_DN73594_c1_g1_i2;TRINITY_DN75702_c2_g1_i1;TRINITY_DN77891_c0_g1_i1;TRINITY_DN77891_c1_g1_i5;TRINITY_DN78300_c2_g8_i1;TRINITY_DN79255_c2_g3_i2;TRINITY_DN79971_c0_g2_i4;TRINITY_DN80224_c0_g2_i1;TRINITY_DN82278_c3_g5_i1;TRINITY_DN83068_c1_g1_i1…	http://amigo.geneontology.org/amigo/term/GO:0006955	BP	30
GO:0010022	meristem determinacy	3/740	23/21795	0.0416639	0.376475	TRINITY_DN62693_c0_g1_i1;TRINITY_DN71392_c0_g1_i7;TRINITY_DN93466_c1_g3_i1	http://amigo.geneontology.org/amigo/term/GO:0010022	BP	3
GO:2000070	regulation of response to water deprivation	3/740	23/21795	0.0416639	0.376475	TRINITY_DN81698_c0_g3_i1;TRINITY_DN94882_c0_g4_i1;TRINITY_DN114980_c0_g1_i1	http://amigo.geneontology.org/amigo/term/GO:2000070	BP	3
GO:0009793	embryo development ending in seed dormancy	38/740	835/21795	0.0417436	0.376475	TRINITY_DN63938_c0_g1_i1;TRINITY_DN68775_c1_g1_i1;TRINITY_DN70135_c0_g2_i3;TRINITY_DN71200_c0_g1_i3;TRINITY_DN73326_c0_g1_i1;TRINITY_DN73326_c0_g3_i3;TRINITY_DN73883_c1_g1_i1;TRINITY_DN73973_c3_g2_i1;TRINITY_DN74175_c1_g3_i2;TRINITY_DN75645_c0_g3_i1;TRINITY_DN76437_c5_g2_i1;TRINITY_DN77139_c0_g2_i1;TRINITY_DN77139_c0_g3_i1;TRINITY_DN77419_c0_g1_i10;TRINITY_DN79970_c9_g2_i1;TRINITY_DN80331_c0_g6_i…	http://amigo.geneontology.org/amigo/term/GO:0009793	BP	38
GO:0035872	nucleotide-binding domain, leucine rich repeat containing receptor signaling pathway	2/740	10/21795	0.0432382	0.379287	TRINITY_DN80224_c0_g2_i1;TRINITY_DN86288_c3_g4_i1	http://amigo.geneontology.org/amigo/term/GO:0035872	BP	2
GO:0016124	xanthophyll catabolic process	2/740	10/21795	0.0432382	0.379287	TRINITY_DN73481_c7_g1_i1;TRINITY_DN73693_c0_g3_i2	http://amigo.geneontology.org/amigo/term/GO:0016124	BP	2
GO:0016121	carotene catabolic process	2/740	10/21795	0.0432382	0.379287	TRINITY_DN73481_c7_g1_i1;TRINITY_DN73693_c0_g3_i2	http://amigo.geneontology.org/amigo/term/GO:0016121	BP	2
GO:0051092	positive regulation of NF-kappaB transcription factor activity	2/740	10/21795	0.0432382	0.379287	TRINITY_DN80224_c0_g2_i1;TRINITY_DN86288_c3_g4_i1	http://amigo.geneontology.org/amigo/term/GO:0051092	BP	2
GO:0010077	maintenance of inflorescence meristem identity	2/740	10/21795	0.0432382	0.379287	TRINITY_DN71392_c0_g1_i7;TRINITY_DN85755_c0_g3_i1	http://amigo.geneontology.org/amigo/term/GO:0010077	BP	2
GO:0016118	carotenoid catabolic process	2/740	10/21795	0.0432382	0.379287	TRINITY_DN73481_c7_g1_i1;TRINITY_DN73693_c0_g3_i2	http://amigo.geneontology.org/amigo/term/GO:0016118	BP	2
GO:2001142	nicotinate transport	2/740	10/21795	0.0432382	0.379287	TRINITY_DN72170_c3_g8_i1;TRINITY_DN72170_c3_g9_i1	http://amigo.geneontology.org/amigo/term/GO:2001142	BP	2
GO:2001143	N-methylnicotinate transport	2/740	10/21795	0.0432382	0.379287	TRINITY_DN72170_c3_g8_i1;TRINITY_DN72170_c3_g9_i1	http://amigo.geneontology.org/amigo/term/GO:2001143	BP	2
GO:0043123	positive regulation of I-kappaB kinase/NF-kappaB signaling	2/740	10/21795	0.0432382	0.379287	TRINITY_DN80224_c0_g2_i1;TRINITY_DN86288_c3_g4_i1	http://amigo.geneontology.org/amigo/term/GO:0043123	BP	2
GO:0009407	toxin catabolic process	5/740	57/21795	0.0437787	0.382865	TRINITY_DN72144_c3_g1_i1;TRINITY_DN81698_c0_g3_i1;TRINITY_DN88003_c3_g5_i2;TRINITY_DN88382_c0_g2_i1;TRINITY_DN114980_c0_g1_i1	http://amigo.geneontology.org/amigo/term/GO:0009407	BP	5
GO:0010942	positive regulation of cell death	11/740	181/21795	0.0452195	0.39427	TRINITY_DN78300_c2_g8_i1;TRINITY_DN79255_c2_g3_i2;TRINITY_DN83068_c1_g1_i1;TRINITY_DN84755_c2_g5_i3;TRINITY_DN85192_c0_g2_i3;TRINITY_DN88648_c1_g2_i3;TRINITY_DN89843_c3_g1_i1;TRINITY_DN89843_c3_g2_i3;TRINITY_DN91119_c1_g1_i2;TRINITY_DN93473_c3_g1_i1;TRINITY_DN96995_c4_g4_i1	http://amigo.geneontology.org/amigo/term/GO:0010942	BP	11
GO:0002376	immune system process	35/740	764/21795	0.0454983	0.395141	TRINITY_DN50025_c0_g1_i1;TRINITY_DN67443_c0_g1_i2;TRINITY_DN70135_c0_g2_i3;TRINITY_DN70721_c0_g5_i1;TRINITY_DN70721_c0_g9_i2;TRINITY_DN71239_c1_g1_i7;TRINITY_DN73594_c1_g1_i2;TRINITY_DN75702_c2_g1_i1;TRINITY_DN77283_c0_g1_i4;TRINITY_DN77283_c0_g5_i1;TRINITY_DN77891_c0_g1_i1;TRINITY_DN77891_c1_g1_i5;TRINITY_DN78300_c2_g8_i1;TRINITY_DN78801_c1_g2_i1;TRINITY_DN79255_c2_g3_i2;TRINITY_DN79971_c0_g2_i4…	http://amigo.geneontology.org/amigo/term/GO:0002376	BP	35
GO:0050789	regulation of biological process	230/740	6157/21795	0.0455932	0.395141	TRINITY_DN15130_c1_g1_i1;TRINITY_DN43850_c0_g1_i1;TRINITY_DN53892_c1_g1_i1;TRINITY_DN57153_c0_g1_i1;TRINITY_DN62693_c0_g1_i1;TRINITY_DN64892_c0_g1_i1;TRINITY_DN65230_c0_g2_i1;TRINITY_DN65799_c0_g1_i3;TRINITY_DN65780_c0_g1_i2;TRINITY_DN66001_c0_g1_i2;TRINITY_DN66576_c0_g1_i2;TRINITY_DN67020_c0_g1_i1;TRINITY_DN67047_c0_g1_i1;TRINITY_DN67132_c0_g1_i1;TRINITY_DN67350_c0_g1_i1;TRINITY_DN67712_c0_g1_i2…	http://amigo.geneontology.org/amigo/term/GO:0050789	BP	230
GO:0042761	very long-chain fatty acid biosynthetic process	4/740	40/21795	0.0459038	0.396642	TRINITY_DN69553_c0_g1_i1;TRINITY_DN91524_c0_g3_i2;TRINITY_DN91524_c0_g4_i2;TRINITY_DN94463_c0_g1_i3	http://amigo.geneontology.org/amigo/term/GO:0042761	BP	4
GO:0009851	auxin biosynthetic process	3/740	24/21795	0.0464515	0.398985	TRINITY_DN78368_c1_g5_i1;TRINITY_DN82731_c0_g4_i2;TRINITY_DN89409_c1_g3_i3	http://amigo.geneontology.org/amigo/term/GO:0009851	BP	3
GO:0048825	cotyledon development	6/740	77/21795	0.0467329	0.400211	TRINITY_DN77419_c0_g1_i10;TRINITY_DN80331_c0_g6_i1;TRINITY_DN82731_c0_g4_i2;TRINITY_DN83949_c1_g2_i2;TRINITY_DN89409_c1_g3_i3;TRINITY_DN89459_c0_g1_i5	http://amigo.geneontology.org/amigo/term/GO:0048825	BP	6
GO:0045087	innate immune response	29/740	616/21795	0.0486012	0.412375	TRINITY_DN50025_c0_g1_i1;TRINITY_DN67443_c0_g1_i2;TRINITY_DN70135_c0_g2_i3;TRINITY_DN70721_c0_g5_i1;TRINITY_DN70721_c0_g9_i2;TRINITY_DN73594_c1_g1_i2;TRINITY_DN75702_c2_g1_i1;TRINITY_DN77891_c0_g1_i1;TRINITY_DN77891_c1_g1_i5;TRINITY_DN78300_c2_g8_i1;TRINITY_DN79255_c2_g3_i2;TRINITY_DN79971_c0_g2_i4;TRINITY_DN80224_c0_g2_i1;TRINITY_DN82278_c3_g5_i1;TRINITY_DN83068_c1_g1_i1;TRINITY_DN84755_c2_g5_i3…	http://amigo.geneontology.org/amigo/term/GO:0045087	BP	29
GO:0016569	covalent chromatin modification	12/740	206/21795	0.0491664	0.412375	TRINITY_DN71200_c0_g1_i3;TRINITY_DN72421_c2_g4_i3;TRINITY_DN74875_c0_g2_i3;TRINITY_DN75500_c1_g1_i1;TRINITY_DN78980_c2_g2_i3;TRINITY_DN79589_c0_g1_i2;TRINITY_DN80224_c0_g2_i1;TRINITY_DN80593_c0_g6_i1;TRINITY_DN80892_c0_g1_i6;TRINITY_DN88658_c1_g3_i5;TRINITY_DN89640_c2_g2_i2;TRINITY_DN93466_c1_g3_i1	http://amigo.geneontology.org/amigo/term/GO:0016569	BP	12
GO:0032870	cellular response to hormone stimulus	43/740	976/21795	0.0492955	0.412375	TRINITY_DN15130_c1_g1_i1;TRINITY_DN57153_c0_g1_i1;TRINITY_DN64892_c0_g1_i1;TRINITY_DN66576_c0_g1_i2;TRINITY_DN67988_c0_g1_i1;TRINITY_DN68780_c0_g2_i2;TRINITY_DN69048_c0_g1_i1;TRINITY_DN69811_c0_g2_i1;TRINITY_DN70602_c0_g1_i1;TRINITY_DN70602_c0_g2_i1;TRINITY_DN70682_c0_g1_i1;TRINITY_DN71392_c0_g1_i7;TRINITY_DN71536_c0_g1_i2;TRINITY_DN71536_c0_g2_i4;TRINITY_DN72421_c2_g4_i3;TRINITY_DN72570_c0_g1_i6…	http://amigo.geneontology.org/amigo/term/GO:0032870	BP	43
GO:0035196	production of miRNAs involved in gene silencing by miRNA	4/740	41/21795	0.0495537	0.412375	TRINITY_DN68559_c0_g1_i2;TRINITY_DN86585_c0_g1_i8;TRINITY_DN92454_c3_g1_i1;TRINITY_DN92796_c5_g1_i1	http://amigo.geneontology.org/amigo/term/GO:0035196	BP	4
GO:0009740	gibberellic acid mediated signaling pathway	5/740	59/21795	0.0495822	0.412375	TRINITY_DN57153_c0_g1_i1;TRINITY_DN71392_c0_g1_i7;TRINITY_DN71536_c0_g1_i2;TRINITY_DN71536_c0_g2_i4;TRINITY_DN93473_c3_g1_i1	http://amigo.geneontology.org/amigo/term/GO:0009740	BP	5
GO:0048767	root hair elongation	8/740	119/21795	0.0499682	0.414391	TRINITY_DN67782_c0_g1_i1;TRINITY_DN73484_c2_g1_i1;TRINITY_DN82276_c1_g3_i1;TRINITY_DN82530_c2_g2_i2;TRINITY_DN83527_c3_g5_i1;TRINITY_DN84843_c0_g1_i5;TRINITY_DN90446_c3_g2_i3;TRINITY_DN90446_c3_g4_i1	http://amigo.geneontology.org/amigo/term/GO:0048767	BP	8
GO:0009733	response to auxin	32/740	694/21795	0.0502814	0.415794	TRINITY_DN15130_c1_g1_i1;TRINITY_DN47199_c0_g1_i1;TRINITY_DN67782_c0_g1_i1;TRINITY_DN68559_c0_g1_i2;TRINITY_DN70135_c0_g2_i3;TRINITY_DN70602_c0_g1_i1;TRINITY_DN70602_c0_g2_i1;TRINITY_DN74175_c1_g3_i2;TRINITY_DN74399_c0_g2_i2;TRINITY_DN75034_c3_g5_i1;TRINITY_DN77590_c0_g5_i1;TRINITY_DN77590_c0_g8_i1;TRINITY_DN78565_c0_g1_i1;TRINITY_DN78712_c1_g3_i2;TRINITY_DN78980_c2_g2_i3;TRINITY_DN79601_c8_g1_i4…	http://amigo.geneontology.org/amigo/term/GO:0009733	BP	32
GO:0065008	regulation of biological quality	59/740	1401/21795	0.0510654	0.421071	TRINITY_DN66576_c0_g1_i2;TRINITY_DN67876_c0_g1_i2;TRINITY_DN68418_c0_g1_i1;TRINITY_DN70135_c0_g2_i3;TRINITY_DN70602_c0_g1_i1;TRINITY_DN70602_c0_g2_i1;TRINITY_DN70640_c1_g1_i2;TRINITY_DN73594_c1_g1_i2;TRINITY_DN74269_c0_g3_i1;TRINITY_DN74269_c0_g1_i10;TRINITY_DN75000_c0_g2_i3;TRINITY_DN76232_c4_g1_i1;TRINITY_DN77283_c0_g1_i4;TRINITY_DN77283_c0_g5_i1;TRINITY_DN77590_c0_g5_i1;TRINITY_DN77590_c0_g8_i…	http://amigo.geneontology.org/amigo/term/GO:0065008	BP	59
GO:0010374	stomatal complex development	7/740	99/21795	0.0515598	0.422527	TRINITY_DN47904_c0_g1_i1;TRINITY_DN73781_c4_g8_i1;TRINITY_DN77419_c0_g1_i10;TRINITY_DN80331_c0_g6_i1;TRINITY_DN83949_c1_g2_i2;TRINITY_DN84017_c0_g8_i1;TRINITY_DN89459_c0_g1_i5	http://amigo.geneontology.org/amigo/term/GO:0010374	BP	7
GO:0010052	guard cell differentiation	2/740	11/21795	0.0516813	0.422527	TRINITY_DN47904_c0_g1_i1;TRINITY_DN84017_c0_g8_i1	http://amigo.geneontology.org/amigo/term/GO:0010052	BP	2
GO:0031407	oxylipin metabolic process	5/740	60/21795	0.0526454	0.428998	TRINITY_DN63938_c0_g1_i1;TRINITY_DN73326_c0_g1_i1;TRINITY_DN73326_c0_g3_i3;TRINITY_DN82128_c1_g2_i2;TRINITY_DN88823_c0_g3_i1	http://amigo.geneontology.org/amigo/term/GO:0031407	BP	5
GO:0050793	regulation of developmental process	50/740	1165/21795	0.05277	0.428998	TRINITY_DN43850_c0_g1_i1;TRINITY_DN53892_c1_g1_i1;TRINITY_DN57153_c0_g1_i1;TRINITY_DN62693_c0_g1_i1;TRINITY_DN65230_c0_g2_i1;TRINITY_DN67020_c0_g1_i1;TRINITY_DN67970_c1_g1_i1;TRINITY_DN68780_c0_g2_i2;TRINITY_DN69048_c0_g1_i1;TRINITY_DN70640_c1_g1_i2;TRINITY_DN71392_c0_g1_i7;TRINITY_DN72421_c2_g4_i3;TRINITY_DN73294_c5_g2_i2;TRINITY_DN74039_c0_g2_i1;TRINITY_DN74175_c1_g3_i2;TRINITY_DN74875_c0_g2_i3…	http://amigo.geneontology.org/amigo/term/GO:0050793	BP	50
GO:0048869	cellular developmental process	63/740	1512/21795	0.0533276	0.432313	TRINITY_DN43850_c0_g1_i1;TRINITY_DN47904_c0_g1_i1;TRINITY_DN67350_c0_g1_i1;TRINITY_DN67782_c0_g1_i1;TRINITY_DN68815_c0_g1_i1;TRINITY_DN68971_c0_g1_i1;TRINITY_DN69048_c0_g1_i1;TRINITY_DN69993_c2_g2_i1;TRINITY_DN70135_c0_g2_i3;TRINITY_DN70539_c0_g1_i1;TRINITY_DN70602_c0_g1_i1;TRINITY_DN70602_c0_g2_i1;TRINITY_DN71355_c0_g1_i1;TRINITY_DN71392_c0_g1_i7;TRINITY_DN71772_c1_g1_i1;TRINITY_DN73033_c0_g3_i1…	http://amigo.geneontology.org/amigo/term/GO:0048869	BP	63
GO:0052542	defense response by callose deposition	7/740	100/21795	0.0538957	0.434478	TRINITY_DN66170_c0_g1_i1;TRINITY_DN74828_c0_g1_i1;TRINITY_DN78565_c0_g1_i1;TRINITY_DN81627_c2_g1_i12;TRINITY_DN86907_c3_g4_i3;TRINITY_DN87313_c1_g1_i9;TRINITY_DN88582_c7_g2_i10	http://amigo.geneontology.org/amigo/term/GO:0052542	BP	7
GO:0048731	system development	144/740	3745/21795	0.0541971	0.43569	TRINITY_DN19531_c0_g1_i1;TRINITY_DN43850_c0_g1_i1;TRINITY_DN47904_c0_g1_i1;TRINITY_DN62693_c0_g1_i1;TRINITY_DN63938_c0_g1_i1;TRINITY_DN64333_c0_g1_i2;TRINITY_DN66001_c0_g1_i2;TRINITY_DN67020_c0_g1_i1;TRINITY_DN67047_c0_g1_i1;TRINITY_DN67350_c0_g1_i1;TRINITY_DN67782_c0_g1_i1;TRINITY_DN68418_c0_g1_i1;TRINITY_DN68780_c0_g2_i2;TRINITY_DN68775_c1_g1_i1;TRINITY_DN68924_c0_g3_i1;TRINITY_DN69073_c2_g1_i1…	http://amigo.geneontology.org/amigo/term/GO:0048731	BP	144
GO:0010114	response to red light	7/740	101/21795	0.0562967	0.446873	TRINITY_DN58158_c0_g1_i1;TRINITY_DN71317_c1_g1_i3;TRINITY_DN77500_c3_g6_i1;TRINITY_DN81851_c0_g2_i8;TRINITY_DN91863_c1_g3_i1;TRINITY_DN92166_c1_g1_i1;TRINITY_DN93501_c0_g3_i1	http://amigo.geneontology.org/amigo/term/GO:0010114	BP	7
GO:0031408	oxylipin biosynthetic process	3/740	26/21795	0.0567966	0.446873	TRINITY_DN63938_c0_g1_i1;TRINITY_DN73326_c0_g1_i1;TRINITY_DN73326_c0_g3_i3	http://amigo.geneontology.org/amigo/term/GO:0031408	BP	3
GO:0010037	response to carbon dioxide	3/740	26/21795	0.0567966	0.446873	TRINITY_DN82552_c2_g1_i1;TRINITY_DN82552_c2_g2_i1;TRINITY_DN91657_c1_g7_i1	http://amigo.geneontology.org/amigo/term/GO:0010037	BP	3
GO:0010589	leaf proximal/distal pattern formation	4/740	43/21795	0.0573172	0.446873	TRINITY_DN68559_c0_g1_i2;TRINITY_DN70135_c0_g2_i3;TRINITY_DN86585_c0_g1_i8;TRINITY_DN92796_c5_g1_i1	http://amigo.geneontology.org/amigo/term/GO:0010589	BP	4
GO:0007178	transmembrane receptor protein serine/threonine kinase signaling pathway	5/740	62/21795	0.0590953	0.446873	TRINITY_DN71772_c1_g1_i1;TRINITY_DN74399_c0_g2_i2;TRINITY_DN74828_c0_g1_i1;TRINITY_DN86288_c3_g4_i1;TRINITY_DN93709_c2_g6_i1	http://amigo.geneontology.org/amigo/term/GO:0007178	BP	5
GO:0023052	signaling	76/740	1874/21795	0.0593073	0.446873	TRINITY_DN15130_c1_g1_i1;TRINITY_DN57153_c0_g1_i1;TRINITY_DN64892_c0_g1_i1;TRINITY_DN65230_c0_g2_i1;TRINITY_DN67988_c0_g1_i1;TRINITY_DN68780_c0_g2_i2;TRINITY_DN69048_c0_g1_i1;TRINITY_DN69285_c0_g1_i1;TRINITY_DN69811_c0_g2_i1;TRINITY_DN70602_c0_g1_i1;TRINITY_DN70602_c0_g2_i1;TRINITY_DN70682_c0_g1_i1;TRINITY_DN70721_c0_g5_i1;TRINITY_DN70721_c0_g9_i2;TRINITY_DN71157_c0_g3_i1;TRINITY_DN71392_c0_g1_i7…	http://amigo.geneontology.org/amigo/term/GO:0023052	BP	76
GO:0070482	response to oxygen levels	13/740	236/21795	0.0600688	0.446873	TRINITY_DN75177_c2_g3_i2;TRINITY_DN75772_c1_g2_i5;TRINITY_DN78300_c2_g8_i1;TRINITY_DN79255_c2_g3_i2;TRINITY_DN83068_c1_g1_i1;TRINITY_DN84755_c2_g5_i3;TRINITY_DN85192_c0_g2_i3;TRINITY_DN86288_c3_g4_i1;TRINITY_DN88648_c1_g2_i3;TRINITY_DN89843_c3_g1_i1;TRINITY_DN89843_c3_g2_i3;TRINITY_DN91657_c1_g7_i1;TRINITY_DN96995_c4_g4_i1	http://amigo.geneontology.org/amigo/term/GO:0070482	BP	13
GO:0016574	histone ubiquitination	2/740	12/21795	0.060654	0.446873	TRINITY_DN74875_c0_g2_i3;TRINITY_DN80224_c0_g2_i1	http://amigo.geneontology.org/amigo/term/GO:0016574	BP	2
GO:0034142	toll-like receptor 4 signaling pathway	2/740	12/21795	0.060654	0.446873	TRINITY_DN80224_c0_g2_i1;TRINITY_DN86288_c3_g4_i1	http://amigo.geneontology.org/amigo/term/GO:0034142	BP	2
GO:1901184	regulation of ERBB signaling pathway	2/740	12/21795	0.060654	0.446873	TRINITY_DN73631_c1_g2_i1;TRINITY_DN86288_c3_g4_i1	http://amigo.geneontology.org/amigo/term/GO:1901184	BP	2
GO:0034138	toll-like receptor 3 signaling pathway	2/740	12/21795	0.060654	0.446873	TRINITY_DN80224_c0_g2_i1;TRINITY_DN86288_c3_g4_i1	http://amigo.geneontology.org/amigo/term/GO:0034138	BP	2
GO:0034134	toll-like receptor 2 signaling pathway	2/740	12/21795	0.060654	0.446873	TRINITY_DN80224_c0_g2_i1;TRINITY_DN86288_c3_g4_i1	http://amigo.geneontology.org/amigo/term/GO:0034134	BP	2
GO:0034130	toll-like receptor 1 signaling pathway	2/740	12/21795	0.060654	0.446873	TRINITY_DN80224_c0_g2_i1;TRINITY_DN86288_c3_g4_i1	http://amigo.geneontology.org/amigo/term/GO:0034130	BP	2
GO:0010199	organ boundary specification between lateral organs and the meristem	2/740	12/21795	0.060654	0.446873	TRINITY_DN72838_c0_g1_i11;TRINITY_DN80567_c0_g6_i1	http://amigo.geneontology.org/amigo/term/GO:0010199	BP	2
GO:1901185	negative regulation of ERBB signaling pathway	2/740	12/21795	0.060654	0.446873	TRINITY_DN73631_c1_g2_i1;TRINITY_DN86288_c3_g4_i1	http://amigo.geneontology.org/amigo/term/GO:1901185	BP	2
GO:0006529	asparagine biosynthetic process	2/740	12/21795	0.060654	0.446873	TRINITY_DN71723_c2_g1_i1;TRINITY_DN92577_c0_g1_i5	http://amigo.geneontology.org/amigo/term/GO:0006529	BP	2
GO:0031054	pre-miRNA processing	2/740	12/21795	0.060654	0.446873	TRINITY_DN68559_c0_g1_i2;TRINITY_DN86585_c0_g1_i8	http://amigo.geneontology.org/amigo/term/GO:0031054	BP	2
GO:0043122	regulation of I-kappaB kinase/NF-kappaB signaling	2/740	12/21795	0.060654	0.446873	TRINITY_DN80224_c0_g2_i1;TRINITY_DN86288_c3_g4_i1	http://amigo.geneontology.org/amigo/term/GO:0043122	BP	2
GO:0042059	negative regulation of epidermal growth factor receptor signaling pathway	2/740	12/21795	0.060654	0.446873	TRINITY_DN73631_c1_g2_i1;TRINITY_DN86288_c3_g4_i1	http://amigo.geneontology.org/amigo/term/GO:0042059	BP	2
GO:0042058	regulation of epidermal growth factor receptor signaling pathway	2/740	12/21795	0.060654	0.446873	TRINITY_DN73631_c1_g2_i1;TRINITY_DN86288_c3_g4_i1	http://amigo.geneontology.org/amigo/term/GO:0042058	BP	2
GO:0015697	quaternary ammonium group transport	2/740	12/21795	0.060654	0.446873	TRINITY_DN72170_c3_g8_i1;TRINITY_DN72170_c3_g9_i1	http://amigo.geneontology.org/amigo/term/GO:0015697	BP	2
GO:0009642	response to light intensity	16/740	308/21795	0.0617745	0.446873	TRINITY_DN19531_c0_g1_i1;TRINITY_DN69285_c0_g1_i1;TRINITY_DN70433_c0_g1_i3;TRINITY_DN70433_c0_g6_i1;TRINITY_DN71723_c2_g1_i1;TRINITY_DN72971_c0_g1_i3;TRINITY_DN75808_c2_g1_i1;TRINITY_DN78503_c0_g1_i2;TRINITY_DN79343_c0_g1_i2;TRINITY_DN81892_c1_g7_i4;TRINITY_DN82036_c3_g1_i3;TRINITY_DN87364_c0_g3_i1;TRINITY_DN91981_c0_g3_i2;TRINITY_DN92577_c0_g1_i5;TRINITY_DN95543_c0_g1_i1;TRINITY_DN95543_c1_g3_i1	http://amigo.geneontology.org/amigo/term/GO:0009642	BP	16
GO:0080060	integument development	3/740	27/21795	0.062343	0.446873	TRINITY_DN67047_c0_g1_i1;TRINITY_DN72765_c0_g1_i1;TRINITY_DN81281_c4_g1_i1	http://amigo.geneontology.org/amigo/term/GO:0080060	BP	3
GO:0042537	benzene-containing compound metabolic process	5/740	63/21795	0.0624817	0.446873	TRINITY_DN43850_c0_g1_i1;TRINITY_DN65523_c0_g1_i1;TRINITY_DN78503_c0_g1_i2;TRINITY_DN89554_c1_g1_i1;TRINITY_DN90326_c0_g1_i5	http://amigo.geneontology.org/amigo/term/GO:0042537	BP	5
GO:0010119	regulation of stomatal movement	9/740	147/21795	0.0634941	0.446873	TRINITY_DN77500_c3_g6_i1;TRINITY_DN77570_c2_g2_i2;TRINITY_DN78565_c0_g1_i1;TRINITY_DN79488_c1_g6_i1;TRINITY_DN80442_c2_g1_i2;TRINITY_DN81627_c2_g1_i12;TRINITY_DN84843_c0_g1_i5;TRINITY_DN91863_c1_g3_i1;TRINITY_DN93501_c0_g3_i1	http://amigo.geneontology.org/amigo/term/GO:0010119	BP	9
GO:0005982	starch metabolic process	9/740	147/21795	0.0634941	0.446873	TRINITY_DN42865_c0_g1_i2;TRINITY_DN69811_c0_g2_i1;TRINITY_DN70263_c0_g1_i2;TRINITY_DN76717_c5_g1_i1;TRINITY_DN78940_c0_g4_i2;TRINITY_DN82953_c1_g1_i7;TRINITY_DN84020_c3_g3_i4;TRINITY_DN91657_c1_g7_i1;TRINITY_DN94133_c0_g1_i8	http://amigo.geneontology.org/amigo/term/GO:0005982	BP	9
GO:0048589	developmental growth	28/740	608/21795	0.0645396	0.446873	TRINITY_DN67782_c0_g1_i1;TRINITY_DN68815_c0_g1_i1;TRINITY_DN68971_c0_g1_i1;TRINITY_DN69048_c0_g1_i1;TRINITY_DN69811_c0_g2_i1;TRINITY_DN70602_c0_g1_i1;TRINITY_DN70602_c0_g2_i1;TRINITY_DN73033_c0_g3_i1;TRINITY_DN73484_c2_g1_i1;TRINITY_DN75500_c1_g1_i1;TRINITY_DN77419_c0_g1_i10;TRINITY_DN80331_c0_g6_i1;TRINITY_DN80415_c4_g1_i1;TRINITY_DN81327_c0_g2_i2;TRINITY_DN82276_c1_g3_i1;TRINITY_DN82530_c2_g2_i…	http://amigo.geneontology.org/amigo/term/GO:0048589	BP	28
GO:0009827	plant-type cell wall modification	4/740	45/21795	0.0656922	0.446873	TRINITY_DN68971_c0_g1_i1;TRINITY_DN77500_c3_g6_i1;TRINITY_DN83762_c2_g3_i1;TRINITY_DN91863_c1_g3_i1	http://amigo.geneontology.org/amigo/term/GO:0009827	BP	4
GO:0000038	very long-chain fatty acid metabolic process	4/740	45/21795	0.0656922	0.446873	TRINITY_DN69553_c0_g1_i1;TRINITY_DN91524_c0_g3_i2;TRINITY_DN91524_c0_g4_i2;TRINITY_DN94463_c0_g1_i3	http://amigo.geneontology.org/amigo/term/GO:0000038	BP	4
GO:0048608	reproductive structure development	81/740	2022/21795	0.0658175	0.446873	TRINITY_DN19531_c0_g1_i1;TRINITY_DN43850_c0_g1_i1;TRINITY_DN62693_c0_g1_i1;TRINITY_DN63938_c0_g1_i1;TRINITY_DN64333_c0_g1_i2;TRINITY_DN66001_c0_g1_i2;TRINITY_DN67020_c0_g1_i1;TRINITY_DN67047_c0_g1_i1;TRINITY_DN67350_c0_g1_i1;TRINITY_DN68780_c0_g2_i2;TRINITY_DN68775_c1_g1_i1;TRINITY_DN69811_c0_g2_i1;TRINITY_DN70135_c0_g2_i3;TRINITY_DN70433_c0_g1_i3;TRINITY_DN70433_c0_g6_i1;TRINITY_DN70539_c0_g1_i1…	http://amigo.geneontology.org/amigo/term/GO:0048608	BP	81
GO:0061458	reproductive system development	81/740	2022/21795	0.0658175	0.446873	TRINITY_DN19531_c0_g1_i1;TRINITY_DN43850_c0_g1_i1;TRINITY_DN62693_c0_g1_i1;TRINITY_DN63938_c0_g1_i1;TRINITY_DN64333_c0_g1_i2;TRINITY_DN66001_c0_g1_i2;TRINITY_DN67020_c0_g1_i1;TRINITY_DN67047_c0_g1_i1;TRINITY_DN67350_c0_g1_i1;TRINITY_DN68780_c0_g2_i2;TRINITY_DN68775_c1_g1_i1;TRINITY_DN69811_c0_g2_i1;TRINITY_DN70135_c0_g2_i3;TRINITY_DN70433_c0_g1_i3;TRINITY_DN70433_c0_g6_i1;TRINITY_DN70539_c0_g1_i1…	http://amigo.geneontology.org/amigo/term/GO:0061458	BP	81
GO:0048507	meristem development	20/740	409/21795	0.0666614	0.446873	TRINITY_DN62693_c0_g1_i1;TRINITY_DN68775_c1_g1_i1;TRINITY_DN69811_c0_g2_i1;TRINITY_DN71392_c0_g1_i7;TRINITY_DN73973_c3_g2_i1;TRINITY_DN74175_c1_g3_i2;TRINITY_DN81280_c0_g1_i1;TRINITY_DN82731_c0_g4_i2;TRINITY_DN83197_c0_g1_i2;TRINITY_DN84005_c0_g1_i6;TRINITY_DN85755_c0_g3_i1;TRINITY_DN86200_c0_g1_i3;TRINITY_DN89084_c1_g2_i3;TRINITY_DN89409_c1_g3_i3;TRINITY_DN89614_c0_g3_i2;TRINITY_DN92298_c1_g5_i1…	http://amigo.geneontology.org/amigo/term/GO:0048507	BP	20
GO:0019567	arabinose biosynthetic process	1/740	2/21795	0.0667542	0.446873	TRINITY_DN70951_c0_g1_i9	http://amigo.geneontology.org/amigo/term/GO:0019567	BP	1
GO:0019389	glucuronoside metabolic process	1/740	2/21795	0.0667542	0.446873	TRINITY_DN68994_c0_g1_i2	http://amigo.geneontology.org/amigo/term/GO:0019389	BP	1
GO:0090355	positive regulation of auxin metabolic process	1/740	2/21795	0.0667542	0.446873	TRINITY_DN68815_c0_g1_i1	http://amigo.geneontology.org/amigo/term/GO:0090355	BP	1
GO:0090358	positive regulation of tryptophan metabolic process	1/740	2/21795	0.0667542	0.446873	TRINITY_DN68815_c0_g1_i1	http://amigo.geneontology.org/amigo/term/GO:0090358	BP	1
GO:0080091	regulation of raffinose metabolic process	1/740	2/21795	0.0667542	0.446873	TRINITY_DN94696_c0_g7_i1	http://amigo.geneontology.org/amigo/term/GO:0080091	BP	1
GO:0019348	dolichol metabolic process	1/740	2/21795	0.0667542	0.446873	TRINITY_DN69285_c0_g1_i1	http://amigo.geneontology.org/amigo/term/GO:0019348	BP	1
GO:0019408	dolichol biosynthetic process	1/740	2/21795	0.0667542	0.446873	TRINITY_DN69285_c0_g1_i1	http://amigo.geneontology.org/amigo/term/GO:0019408	BP	1
GO:0019391	glucuronoside catabolic process	1/740	2/21795	0.0667542	0.446873	TRINITY_DN68994_c0_g1_i2	http://amigo.geneontology.org/amigo/term/GO:0019391	BP	1
GO:0022405	hair cycle process	1/740	2/21795	0.0667542	0.446873	TRINITY_DN94190_c2_g1_i20	http://amigo.geneontology.org/amigo/term/GO:0022405	BP	1
GO:0042769	DNA damage response, detection of DNA damage	1/740	2/21795	0.0667542	0.446873	TRINITY_DN80224_c0_g2_i1	http://amigo.geneontology.org/amigo/term/GO:0042769	BP	1
GO:0010136	ureide catabolic process	1/740	2/21795	0.0667542	0.446873	TRINITY_DN72908_c0_g1_i9	http://amigo.geneontology.org/amigo/term/GO:0010136	BP	1
GO:0045109	intermediate filament organization	1/740	2/21795	0.0667542	0.446873	TRINITY_DN94190_c2_g1_i20	http://amigo.geneontology.org/amigo/term/GO:0045109	BP	1
GO:0001942	hair follicle development	1/740	2/21795	0.0667542	0.446873	TRINITY_DN94190_c2_g1_i20	http://amigo.geneontology.org/amigo/term/GO:0001942	BP	1
GO:0042633	hair cycle	1/740	2/21795	0.0667542	0.446873	TRINITY_DN94190_c2_g1_i20	http://amigo.geneontology.org/amigo/term/GO:0042633	BP	1
GO:0001892	embryonic placenta development	1/740	2/21795	0.0667542	0.446873	TRINITY_DN94190_c2_g1_i20	http://amigo.geneontology.org/amigo/term/GO:0001892	BP	1
GO:0032212	positive regulation of telomere maintenance via telomerase	1/740	2/21795	0.0667542	0.446873	TRINITY_DN79180_c4_g2_i1	http://amigo.geneontology.org/amigo/term/GO:0032212	BP	1
GO:0008594	photoreceptor cell morphogenesis	1/740	2/21795	0.0667542	0.446873	TRINITY_DN80224_c0_g2_i1	http://amigo.geneontology.org/amigo/term/GO:0008594	BP	1
GO:0032206	positive regulation of telomere maintenance	1/740	2/21795	0.0667542	0.446873	TRINITY_DN79180_c4_g2_i1	http://amigo.geneontology.org/amigo/term/GO:0032206	BP	1
GO:0007412	axon target recognition	1/740	2/21795	0.0667542	0.446873	TRINITY_DN80224_c0_g2_i1	http://amigo.geneontology.org/amigo/term/GO:0007412	BP	1
GO:0033189	response to vitamin A	1/740	2/21795	0.0667542	0.446873	TRINITY_DN75152_c3_g2_i1	http://amigo.geneontology.org/amigo/term/GO:0033189	BP	1
GO:0048587	regulation of short-day photoperiodism, flowering	1/740	2/21795	0.0667542	0.446873	TRINITY_DN75500_c1_g1_i1	http://amigo.geneontology.org/amigo/term/GO:0048587	BP	1
GO:0031581	hemidesmosome assembly	1/740	2/21795	0.0667542	0.446873	TRINITY_DN94190_c2_g1_i20	http://amigo.geneontology.org/amigo/term/GO:0031581	BP	1
GO:0070914	UV-damage excision repair	1/740	2/21795	0.0667542	0.446873	TRINITY_DN80224_c0_g2_i1	http://amigo.geneontology.org/amigo/term/GO:0070914	BP	1
GO:0050680	negative regulation of epithelial cell proliferation	1/740	2/21795	0.0667542	0.446873	TRINITY_DN94190_c2_g1_i20	http://amigo.geneontology.org/amigo/term/GO:0050680	BP	1
GO:0042730	fibrinolysis	1/740	2/21795	0.0667542	0.446873	TRINITY_DN94190_c2_g1_i20	http://amigo.geneontology.org/amigo/term/GO:0042730	BP	1
GO:0009741	response to brassinosteroid	11/740	194/21795	0.0674845	0.446873	TRINITY_DN15130_c1_g1_i1;TRINITY_DN69048_c0_g1_i1;TRINITY_DN72423_c0_g1_i1;TRINITY_DN72423_c1_g1_i2;TRINITY_DN72570_c0_g1_i6;TRINITY_DN74399_c0_g2_i2;TRINITY_DN75500_c1_g1_i1;TRINITY_DN78368_c1_g5_i1;TRINITY_DN79601_c8_g1_i4;TRINITY_DN87382_c0_g1_i2;TRINITY_DN90264_c0_g4_i2	http://amigo.geneontology.org/amigo/term/GO:0009741	BP	11
GO:0010038	response to metal ion	67/740	1644/21795	0.0679466	0.446873	TRINITY_DN63681_c0_g1_i1;TRINITY_DN65230_c0_g2_i1;TRINITY_DN65778_c0_g1_i1;TRINITY_DN66297_c0_g1_i1;TRINITY_DN71012_c0_g1_i1;TRINITY_DN71323_c1_g3_i5;TRINITY_DN72144_c3_g1_i1;TRINITY_DN73577_c5_g1_i1;TRINITY_DN73888_c0_g3_i2;TRINITY_DN75177_c2_g3_i2;TRINITY_DN75350_c1_g3_i2;TRINITY_DN76437_c5_g2_i1;TRINITY_DN76870_c0_g2_i4;TRINITY_DN77139_c0_g2_i1;TRINITY_DN77139_c0_g3_i1;TRINITY_DN77891_c0_g1_i1…	http://amigo.geneontology.org/amigo/term/GO:0010038	BP	67
GO:0071345	cellular response to cytokine stimulus	3/740	28/21795	0.0681303	0.446873	TRINITY_DN80224_c0_g2_i1;TRINITY_DN86288_c3_g4_i1;TRINITY_DN94190_c2_g1_i20	http://amigo.geneontology.org/amigo/term/GO:0071345	BP	3
GO:0042126	nitrate metabolic process	3/740	28/21795	0.0681303	0.446873	TRINITY_DN65778_c0_g1_i1;TRINITY_DN72290_c0_g2_i2;TRINITY_DN160181_c0_g1_i1	http://amigo.geneontology.org/amigo/term/GO:0042126	BP	3
GO:0042128	nitrate assimilation	3/740	28/21795	0.0681303	0.446873	TRINITY_DN65778_c0_g1_i1;TRINITY_DN72290_c0_g2_i2;TRINITY_DN160181_c0_g1_i1	http://amigo.geneontology.org/amigo/term/GO:0042128	BP	3
GO:2001057	reactive nitrogen species metabolic process	3/740	28/21795	0.0681303	0.446873	TRINITY_DN65778_c0_g1_i1;TRINITY_DN72290_c0_g2_i2;TRINITY_DN160181_c0_g1_i1	http://amigo.geneontology.org/amigo/term/GO:2001057	BP	3
GO:0042742	defense response to bacterium	38/740	872/21795	0.0698822	0.451652	TRINITY_DN50025_c0_g1_i1;TRINITY_DN66170_c0_g1_i1;TRINITY_DN67443_c0_g1_i2;TRINITY_DN67891_c0_g1_i1;TRINITY_DN70263_c0_g1_i2;TRINITY_DN73242_c7_g1_i9;TRINITY_DN73594_c1_g1_i2;TRINITY_DN74828_c0_g1_i1;TRINITY_DN75702_c2_g1_i1;TRINITY_DN76232_c4_g1_i1;TRINITY_DN77283_c0_g1_i4;TRINITY_DN77283_c0_g5_i1;TRINITY_DN77976_c1_g1_i2;TRINITY_DN78300_c2_g8_i1;TRINITY_DN78503_c0_g1_i2;TRINITY_DN78565_c0_g1_i1…	http://amigo.geneontology.org/amigo/term/GO:0042742	BP	38
GO:0006896	Golgi to vacuole transport	2/740	13/21795	0.0701108	0.451652	TRINITY_DN82697_c2_g3_i1;TRINITY_DN86583_c0_g3_i1	http://amigo.geneontology.org/amigo/term/GO:0006896	BP	2
GO:0046855	inositol phosphate dephosphorylation	2/740	13/21795	0.0701108	0.451652	TRINITY_DN75732_c1_g1_i6;TRINITY_DN84005_c0_g1_i6	http://amigo.geneontology.org/amigo/term/GO:0046855	BP	2
GO:0046838	phosphorylated carbohydrate dephosphorylation	2/740	13/21795	0.0701108	0.451652	TRINITY_DN75732_c1_g1_i6;TRINITY_DN84005_c0_g1_i6	http://amigo.geneontology.org/amigo/term/GO:0046838	BP	2
GO:0042246	tissue regeneration	2/740	13/21795	0.0701108	0.451652	TRINITY_DN88654_c0_g2_i8;TRINITY_DN94190_c2_g1_i20	http://amigo.geneontology.org/amigo/term/GO:0042246	BP	2
GO:0071545	inositol phosphate catabolic process	2/740	13/21795	0.0701108	0.451652	TRINITY_DN75732_c1_g1_i6;TRINITY_DN84005_c0_g1_i6	http://amigo.geneontology.org/amigo/term/GO:0071545	BP	2
GO:0008063	Toll signaling pathway	2/740	13/21795	0.0701108	0.451652	TRINITY_DN80224_c0_g2_i1;TRINITY_DN86288_c3_g4_i1	http://amigo.geneontology.org/amigo/term/GO:0008063	BP	2
GO:0019373	epoxygenase P450 pathway	2/740	13/21795	0.0701108	0.451652	TRINITY_DN82128_c1_g2_i2;TRINITY_DN88823_c0_g3_i1	http://amigo.geneontology.org/amigo/term/GO:0019373	BP	2
GO:0009816	defense response to bacterium, incompatible interaction	10/740	173/21795	0.0712409	0.456891	TRINITY_DN67443_c0_g1_i2;TRINITY_DN78300_c2_g8_i1;TRINITY_DN79255_c2_g3_i2;TRINITY_DN83068_c1_g1_i1;TRINITY_DN85192_c0_g2_i3;TRINITY_DN86284_c4_g7_i1;TRINITY_DN88648_c1_g2_i3;TRINITY_DN89843_c3_g1_i1;TRINITY_DN89843_c3_g2_i3;TRINITY_DN96995_c4_g4_i1	http://amigo.geneontology.org/amigo/term/GO:0009816	BP	10
GO:0009749	response to glucose	6/740	86/21795	0.0722363	0.461226	TRINITY_DN66576_c0_g1_i2;TRINITY_DN69811_c0_g2_i1;TRINITY_DN71723_c2_g1_i1;TRINITY_DN91657_c1_g7_i1;TRINITY_DN91981_c0_g3_i2;TRINITY_DN92577_c0_g1_i5	http://amigo.geneontology.org/amigo/term/GO:0009749	BP	6
GO:0009873	ethylene-activated signaling pathway	6/740	86/21795	0.0722363	0.461226	TRINITY_DN70682_c0_g1_i1;TRINITY_DN73594_c1_g1_i2;TRINITY_DN75000_c0_g2_i3;TRINITY_DN79602_c0_g1_i2;TRINITY_DN81627_c2_g1_i12;TRINITY_DN93265_c2_g2_i1	http://amigo.geneontology.org/amigo/term/GO:0009873	BP	6
GO:0080090	regulation of primary metabolic process	108/740	2780/21795	0.0726738	0.462995	TRINITY_DN53892_c1_g1_i1;TRINITY_DN62693_c0_g1_i1;TRINITY_DN65799_c0_g1_i3;TRINITY_DN65780_c0_g1_i2;TRINITY_DN66001_c0_g1_i2;TRINITY_DN66576_c0_g1_i2;TRINITY_DN67132_c0_g1_i1;TRINITY_DN67350_c0_g1_i1;TRINITY_DN67712_c0_g1_i2;TRINITY_DN68539_c0_g1_i1;TRINITY_DN68780_c0_g2_i2;TRINITY_DN68775_c1_g1_i1;TRINITY_DN68815_c0_g1_i1;TRINITY_DN68924_c0_g3_i1;TRINITY_DN69537_c0_g2_i1;TRINITY_DN69811_c0_g2_i1…	http://amigo.geneontology.org/amigo/term/GO:0080090	BP	108
GO:0010476	gibberellin mediated signaling pathway	5/740	66/21795	0.0732828	0.465846	TRINITY_DN57153_c0_g1_i1;TRINITY_DN71392_c0_g1_i7;TRINITY_DN71536_c0_g1_i2;TRINITY_DN71536_c0_g2_i4;TRINITY_DN93473_c3_g1_i1	http://amigo.geneontology.org/amigo/term/GO:0010476	BP	5
GO:0051704	multi-organism process	108/740	2783/21795	0.0742983	0.471264	TRINITY_DN50025_c0_g1_i1;TRINITY_DN62427_c0_g1_i1;TRINITY_DN64333_c0_g1_i2;TRINITY_DN65768_c0_g1_i1;TRINITY_DN66170_c0_g1_i1;TRINITY_DN67443_c0_g1_i2;TRINITY_DN67891_c0_g1_i1;TRINITY_DN70135_c0_g2_i3;TRINITY_DN70263_c0_g1_i2;TRINITY_DN70538_c0_g1_i1;TRINITY_DN70640_c1_g1_i2;TRINITY_DN70721_c0_g5_i1;TRINITY_DN70721_c0_g9_i2;TRINITY_DN72627_c2_g1_i3;TRINITY_DN73242_c7_g1_i9;TRINITY_DN73332_c4_g2_i2…	http://amigo.geneontology.org/amigo/term/GO:0051704	BP	108
GO:0006690	icosanoid metabolic process	4/740	47/21795	0.0746667	0.471527	TRINITY_DN71562_c3_g1_i1;TRINITY_DN82128_c1_g2_i2;TRINITY_DN88823_c0_g3_i1;TRINITY_DN91427_c7_g2_i3	http://amigo.geneontology.org/amigo/term/GO:0006690	BP	4
GO:0009954	proximal/distal pattern formation	4/740	47/21795	0.0746667	0.471527	TRINITY_DN68559_c0_g1_i2;TRINITY_DN70135_c0_g2_i3;TRINITY_DN86585_c0_g1_i8;TRINITY_DN92796_c5_g1_i1	http://amigo.geneontology.org/amigo/term/GO:0009954	BP	4
GO:0016052	carbohydrate catabolic process	18/740	367/21795	0.077015	0.47952	TRINITY_DN42865_c0_g1_i2;TRINITY_DN68994_c0_g1_i2;TRINITY_DN69811_c0_g2_i1;TRINITY_DN72895_c3_g2_i4;TRINITY_DN75350_c1_g3_i2;TRINITY_DN76717_c5_g1_i1;TRINITY_DN81193_c0_g2_i4;TRINITY_DN81193_c0_g1_i3;TRINITY_DN82953_c1_g1_i7;TRINITY_DN85255_c1_g1_i1;TRINITY_DN86638_c3_g6_i2;TRINITY_DN88654_c0_g2_i8;TRINITY_DN89202_c1_g2_i1;TRINITY_DN89202_c1_g4_i1;TRINITY_DN89202_c1_g5_i1;TRINITY_DN89202_c1_g6_i3…	http://amigo.geneontology.org/amigo/term/GO:0016052	BP	18
GO:0009404	toxin metabolic process	5/740	67/21795	0.0770954	0.47952	TRINITY_DN72144_c3_g1_i1;TRINITY_DN81698_c0_g3_i1;TRINITY_DN88003_c3_g5_i2;TRINITY_DN88382_c0_g2_i1;TRINITY_DN114980_c0_g1_i1	http://amigo.geneontology.org/amigo/term/GO:0009404	BP	5
GO:0002253	activation of immune response	5/740	67/21795	0.0770954	0.47952	TRINITY_DN77283_c0_g1_i4;TRINITY_DN77283_c0_g5_i1;TRINITY_DN80224_c0_g2_i1;TRINITY_DN86288_c3_g4_i1;TRINITY_DN94190_c2_g1_i20	http://amigo.geneontology.org/amigo/term/GO:0002253	BP	5
GO:0031669	cellular response to nutrient levels	15/740	294/21795	0.0775555	0.481345	TRINITY_DN70525_c3_g2_i1;TRINITY_DN71723_c2_g1_i1;TRINITY_DN72450_c1_g5_i2;TRINITY_DN72908_c0_g1_i9;TRINITY_DN77891_c0_g1_i1;TRINITY_DN77891_c1_g1_i5;TRINITY_DN87035_c0_g1_i6;TRINITY_DN87659_c0_g1_i4;TRINITY_DN90204_c2_g3_i5;TRINITY_DN91375_c1_g1_i2;TRINITY_DN91900_c4_g1_i3;TRINITY_DN92577_c0_g1_i5;TRINITY_DN93749_c0_g1_i3;TRINITY_DN93805_c2_g1_i3;TRINITY_DN94882_c0_g4_i1	http://amigo.geneontology.org/amigo/term/GO:0031669	BP	15
GO:2001141	regulation of RNA biosynthetic process	83/740	2099/21795	0.0793696	0.488494	TRINITY_DN62693_c0_g1_i1;TRINITY_DN65799_c0_g1_i3;TRINITY_DN65780_c0_g1_i2;TRINITY_DN66576_c0_g1_i2;TRINITY_DN67132_c0_g1_i1;TRINITY_DN67350_c0_g1_i1;TRINITY_DN67712_c0_g1_i2;TRINITY_DN68539_c0_g1_i1;TRINITY_DN68780_c0_g2_i2;TRINITY_DN68775_c1_g1_i1;TRINITY_DN68924_c0_g3_i1;TRINITY_DN69537_c0_g2_i1;TRINITY_DN69811_c0_g2_i1;TRINITY_DN70539_c0_g1_i1;TRINITY_DN70682_c0_g1_i1;TRINITY_DN70871_c0_g1_i1…	http://amigo.geneontology.org/amigo/term/GO:2001141	BP	83
GO:0043572	plastid fission	4/740	48/21795	0.0793741	0.488494	TRINITY_DN77344_c1_g6_i1;TRINITY_DN77344_c1_g7_i1;TRINITY_DN87241_c2_g1_i1;TRINITY_DN97059_c7_g1_i1	http://amigo.geneontology.org/amigo/term/GO:0043572	BP	4
GO:0007173	epidermal growth factor receptor signaling pathway	2/740	14/21795	0.0800086	0.488494	TRINITY_DN73631_c1_g2_i1;TRINITY_DN86288_c3_g4_i1	http://amigo.geneontology.org/amigo/term/GO:0007173	BP	2
GO:0038127	ERBB signaling pathway	2/740	14/21795	0.0800086	0.488494	TRINITY_DN73631_c1_g2_i1;TRINITY_DN86288_c3_g4_i1	http://amigo.geneontology.org/amigo/term/GO:0038127	BP	2
GO:0002224	toll-like receptor signaling pathway	2/740	14/21795	0.0800086	0.488494	TRINITY_DN80224_c0_g2_i1;TRINITY_DN86288_c3_g4_i1	http://amigo.geneontology.org/amigo/term/GO:0002224	BP	2
GO:0015798	myo-inositol transport	2/740	14/21795	0.0800086	0.488494	TRINITY_DN71157_c0_g3_i1;TRINITY_DN76628_c0_g1_i1	http://amigo.geneontology.org/amigo/term/GO:0015798	BP	2
GO:0002755	MyD88-dependent toll-like receptor signaling pathway	2/740	14/21795	0.0800086	0.488494	TRINITY_DN80224_c0_g2_i1;TRINITY_DN86288_c3_g4_i1	http://amigo.geneontology.org/amigo/term/GO:0002755	BP	2
GO:0043562	cellular response to nitrogen levels	3/740	30/21795	0.0804001	0.488494	TRINITY_DN72908_c0_g1_i9;TRINITY_DN90204_c2_g3_i5;TRINITY_DN93805_c2_g1_i3	http://amigo.geneontology.org/amigo/term/GO:0043562	BP	3
GO:0071941	nitrogen cycle metabolic process	3/740	30/21795	0.0804001	0.488494	TRINITY_DN65778_c0_g1_i1;TRINITY_DN72290_c0_g2_i2;TRINITY_DN160181_c0_g1_i1	http://amigo.geneontology.org/amigo/term/GO:0071941	BP	3
GO:0051258	protein polymerization	3/740	30/21795	0.0804001	0.488494	TRINITY_DN80224_c0_g2_i1;TRINITY_DN86786_c1_g1_i3;TRINITY_DN95329_c3_g2_i1	http://amigo.geneontology.org/amigo/term/GO:0051258	BP	3
GO:0052545	callose localization	7/740	110/21795	0.0808643	0.490282	TRINITY_DN66170_c0_g1_i1;TRINITY_DN74828_c0_g1_i1;TRINITY_DN78565_c0_g1_i1;TRINITY_DN81627_c2_g1_i12;TRINITY_DN86907_c3_g4_i3;TRINITY_DN87313_c1_g1_i9;TRINITY_DN88582_c7_g2_i10	http://amigo.geneontology.org/amigo/term/GO:0052545	BP	7
GO:0016458	gene silencing	16/740	321/21795	0.0821232	0.49481	TRINITY_DN68559_c0_g1_i2;TRINITY_DN70135_c0_g2_i3;TRINITY_DN71200_c0_g1_i3;TRINITY_DN77123_c1_g2_i8;TRINITY_DN77451_c0_g4_i1;TRINITY_DN78441_c2_g1_i5;TRINITY_DN80593_c0_g6_i1;TRINITY_DN81280_c0_g1_i1;TRINITY_DN84723_c0_g4_i1;TRINITY_DN85827_c2_g1_i4;TRINITY_DN86585_c0_g1_i8;TRINITY_DN88658_c1_g3_i5;TRINITY_DN92454_c3_g1_i1;TRINITY_DN92796_c5_g1_i1;TRINITY_DN93493_c1_g2_i5;TRINITY_DN215683_c0_g1_i1	http://amigo.geneontology.org/amigo/term/GO:0016458	BP	16
GO:0051716	cellular response to stimulus	135/740	3554/21795	0.0821255	0.49481	TRINITY_DN15130_c1_g1_i1;TRINITY_DN50025_c0_g1_i1;TRINITY_DN57153_c0_g1_i1;TRINITY_DN64892_c0_g1_i1;TRINITY_DN65230_c0_g2_i1;TRINITY_DN66170_c0_g1_i1;TRINITY_DN66576_c0_g1_i2;TRINITY_DN67988_c0_g1_i1;TRINITY_DN68559_c0_g1_i2;TRINITY_DN68780_c0_g2_i2;TRINITY_DN69048_c0_g1_i1;TRINITY_DN69285_c0_g1_i1;TRINITY_DN69811_c0_g2_i1;TRINITY_DN70525_c3_g2_i1;TRINITY_DN70602_c0_g1_i1;TRINITY_DN70602_c0_g2_i1…	http://amigo.geneontology.org/amigo/term/GO:0051716	BP	135
GO:2000377	regulation of reactive oxygen species metabolic process	10/740	178/21795	0.082517	0.496133	TRINITY_DN78300_c2_g8_i1;TRINITY_DN78503_c0_g1_i2;TRINITY_DN79255_c2_g3_i2;TRINITY_DN83068_c1_g1_i1;TRINITY_DN84755_c2_g5_i3;TRINITY_DN85192_c0_g2_i3;TRINITY_DN88648_c1_g2_i3;TRINITY_DN89843_c3_g1_i1;TRINITY_DN89843_c3_g2_i3;TRINITY_DN96995_c4_g4_i1	http://amigo.geneontology.org/amigo/term/GO:2000377	BP	10
GO:0048831	regulation of shoot system development	17/740	346/21795	0.0828443	0.497066	TRINITY_DN53892_c1_g1_i1;TRINITY_DN57153_c0_g1_i1;TRINITY_DN62693_c0_g1_i1;TRINITY_DN67970_c1_g1_i1;TRINITY_DN74875_c0_g2_i3;TRINITY_DN76957_c0_g4_i4;TRINITY_DN78441_c2_g1_i5;TRINITY_DN86357_c6_g4_i1;TRINITY_DN86713_c0_g5_i3;TRINITY_DN86927_c4_g1_i2;TRINITY_DN91119_c1_g1_i2;TRINITY_DN92796_c5_g1_i1;TRINITY_DN93265_c3_g1_i2;TRINITY_DN93466_c1_g3_i1;TRINITY_DN93786_c0_g2_i1;TRINITY_DN94882_c0_g4_i1…	http://amigo.geneontology.org/amigo/term/GO:0048831	BP	17
GO:0000724	double-strand break repair via homologous recombination	4/740	49/21795	0.0842255	0.504301	TRINITY_DN77207_c2_g1_i3;TRINITY_DN80224_c0_g2_i1;TRINITY_DN90242_c6_g1_i2;TRINITY_DN95884_c0_g1_i1	http://amigo.geneontology.org/amigo/term/GO:0000724	BP	4
GO:0006355	regulation of transcription, DNA-templated	82/740	2079/21795	0.0844242	0.504301	TRINITY_DN62693_c0_g1_i1;TRINITY_DN65799_c0_g1_i3;TRINITY_DN65780_c0_g1_i2;TRINITY_DN66576_c0_g1_i2;TRINITY_DN67132_c0_g1_i1;TRINITY_DN67350_c0_g1_i1;TRINITY_DN67712_c0_g1_i2;TRINITY_DN68539_c0_g1_i1;TRINITY_DN68780_c0_g2_i2;TRINITY_DN68775_c1_g1_i1;TRINITY_DN68924_c0_g3_i1;TRINITY_DN69537_c0_g2_i1;TRINITY_DN69811_c0_g2_i1;TRINITY_DN70539_c0_g1_i1;TRINITY_DN70682_c0_g1_i1;TRINITY_DN70871_c0_g1_i1…	http://amigo.geneontology.org/amigo/term/GO:0006355	BP	82
GO:0060560	developmental growth involved in morphogenesis	24/740	523/21795	0.0845744	0.504301	TRINITY_DN67782_c0_g1_i1;TRINITY_DN68815_c0_g1_i1;TRINITY_DN68971_c0_g1_i1;TRINITY_DN69048_c0_g1_i1;TRINITY_DN70602_c0_g1_i1;TRINITY_DN70602_c0_g2_i1;TRINITY_DN73033_c0_g3_i1;TRINITY_DN73484_c2_g1_i1;TRINITY_DN75500_c1_g1_i1;TRINITY_DN77419_c0_g1_i10;TRINITY_DN80331_c0_g6_i1;TRINITY_DN80415_c4_g1_i1;TRINITY_DN81327_c0_g2_i2;TRINITY_DN82276_c1_g3_i1;TRINITY_DN82530_c2_g2_i2;TRINITY_DN83527_c3_g5_i…	http://amigo.geneontology.org/amigo/term/GO:0060560	BP	24
GO:0009723	response to ethylene	14/740	274/21795	0.0851732	0.506824	TRINITY_DN70682_c0_g1_i1;TRINITY_DN70871_c0_g1_i1;TRINITY_DN73594_c1_g1_i2;TRINITY_DN75000_c0_g2_i3;TRINITY_DN78565_c0_g1_i1;TRINITY_DN78980_c2_g2_i3;TRINITY_DN79488_c1_g6_i1;TRINITY_DN79602_c0_g1_i2;TRINITY_DN81627_c2_g1_i12;TRINITY_DN82731_c0_g4_i2;TRINITY_DN83155_c0_g4_i1;TRINITY_DN89409_c1_g3_i3;TRINITY_DN93265_c2_g2_i1;TRINITY_DN94696_c0_g7_i1	http://amigo.geneontology.org/amigo/term/GO:0009723	BP	14
GO:0007165	signal transduction	72/740	1806/21795	0.085812	0.508242	TRINITY_DN15130_c1_g1_i1;TRINITY_DN57153_c0_g1_i1;TRINITY_DN64892_c0_g1_i1;TRINITY_DN65230_c0_g2_i1;TRINITY_DN67988_c0_g1_i1;TRINITY_DN68780_c0_g2_i2;TRINITY_DN69048_c0_g1_i1;TRINITY_DN69285_c0_g1_i1;TRINITY_DN69811_c0_g2_i1;TRINITY_DN70602_c0_g1_i1;TRINITY_DN70602_c0_g2_i1;TRINITY_DN70682_c0_g1_i1;TRINITY_DN70721_c0_g5_i1;TRINITY_DN70721_c0_g9_i2;TRINITY_DN71392_c0_g1_i7;TRINITY_DN71536_c0_g1_i2…	http://amigo.geneontology.org/amigo/term/GO:0007165	BP	72
GO:0031668	cellular response to extracellular stimulus	18/740	373/21795	0.0865238	0.508242	TRINITY_DN70525_c3_g2_i1;TRINITY_DN71723_c2_g1_i1;TRINITY_DN72144_c3_g1_i1;TRINITY_DN72450_c1_g5_i2;TRINITY_DN72908_c0_g1_i9;TRINITY_DN77891_c0_g1_i1;TRINITY_DN77891_c1_g1_i5;TRINITY_DN84205_c2_g1_i2;TRINITY_DN87035_c0_g1_i6;TRINITY_DN87659_c0_g1_i4;TRINITY_DN88382_c0_g2_i1;TRINITY_DN90204_c2_g3_i5;TRINITY_DN91375_c1_g1_i2;TRINITY_DN91900_c4_g1_i3;TRINITY_DN92577_c0_g1_i5;TRINITY_DN93749_c0_g1_i3…	http://amigo.geneontology.org/amigo/term/GO:0031668	BP	18
GO:0009833	plant-type primary cell wall biogenesis	3/740	31/21795	0.0868682	0.508242	TRINITY_DN74169_c0_g7_i1;TRINITY_DN87396_c1_g3_i1;TRINITY_DN87396_c1_g2_i6	http://amigo.geneontology.org/amigo/term/GO:0009833	BP	3
GO:0019827	stem cell population maintenance	7/740	112/21795	0.0870478	0.508242	TRINITY_DN71392_c0_g1_i7;TRINITY_DN81280_c0_g1_i1;TRINITY_DN82731_c0_g4_i2;TRINITY_DN85755_c0_g3_i1;TRINITY_DN87015_c1_g5_i3;TRINITY_DN89409_c1_g3_i3;TRINITY_DN92946_c1_g3_i6	http://amigo.geneontology.org/amigo/term/GO:0019827	BP	7
GO:0009888	tissue development	57/740	1399/21795	0.0873441	0.508242	TRINITY_DN43850_c0_g1_i1;TRINITY_DN47904_c0_g1_i1;TRINITY_DN62693_c0_g1_i1;TRINITY_DN67020_c0_g1_i1;TRINITY_DN67047_c0_g1_i1;TRINITY_DN67782_c0_g1_i1;TRINITY_DN68775_c1_g1_i1;TRINITY_DN69073_c2_g1_i1;TRINITY_DN69811_c0_g2_i1;TRINITY_DN69993_c2_g2_i1;TRINITY_DN70539_c0_g1_i1;TRINITY_DN71392_c0_g1_i7;TRINITY_DN72765_c0_g1_i1;TRINITY_DN72838_c0_g1_i11;TRINITY_DN73484_c2_g1_i1;TRINITY_DN73781_c4_g8_i…	http://amigo.geneontology.org/amigo/term/GO:0009888	BP	57
GO:0031667	response to nutrient levels	21/740	449/21795	0.0876963	0.508242	TRINITY_DN43850_c0_g1_i1;TRINITY_DN70525_c3_g2_i1;TRINITY_DN71723_c2_g1_i1;TRINITY_DN72450_c1_g5_i2;TRINITY_DN72908_c0_g1_i9;TRINITY_DN75152_c3_g2_i1;TRINITY_DN77891_c0_g1_i1;TRINITY_DN77891_c1_g1_i5;TRINITY_DN81011_c0_g2_i4;TRINITY_DN82498_c1_g1_i6;TRINITY_DN87035_c0_g1_i6;TRINITY_DN87659_c0_g1_i4;TRINITY_DN89325_c2_g2_i6;TRINITY_DN90204_c2_g3_i5;TRINITY_DN91375_c1_g1_i2;TRINITY_DN91900_c4_g1_i3…	http://amigo.geneontology.org/amigo/term/GO:0031667	BP	21
GO:0019853	L-ascorbic acid biosynthetic process	5/740	70/21795	0.089159	0.508242	TRINITY_DN49697_c0_g1_i1;TRINITY_DN66170_c0_g1_i1;TRINITY_DN77314_c0_g3_i1;TRINITY_DN77314_c0_g1_i5;TRINITY_DN87313_c1_g1_i9	http://amigo.geneontology.org/amigo/term/GO:0019853	BP	5
GO:0031323	regulation of cellular metabolic process	117/740	3062/21795	0.0900821	0.508242	TRINITY_DN62693_c0_g1_i1;TRINITY_DN65799_c0_g1_i3;TRINITY_DN65780_c0_g1_i2;TRINITY_DN66001_c0_g1_i2;TRINITY_DN66576_c0_g1_i2;TRINITY_DN67132_c0_g1_i1;TRINITY_DN67350_c0_g1_i1;TRINITY_DN67712_c0_g1_i2;TRINITY_DN68539_c0_g1_i1;TRINITY_DN68780_c0_g2_i2;TRINITY_DN68775_c1_g1_i1;TRINITY_DN68815_c0_g1_i1;TRINITY_DN68924_c0_g3_i1;TRINITY_DN69537_c0_g2_i1;TRINITY_DN69811_c0_g2_i1;TRINITY_DN70539_c0_g1_i1…	http://amigo.geneontology.org/amigo/term/GO:0031323	BP	117
GO:0009617	response to bacterium	44/740	1052/21795	0.0901071	0.508242	TRINITY_DN50025_c0_g1_i1;TRINITY_DN66170_c0_g1_i1;TRINITY_DN67443_c0_g1_i2;TRINITY_DN67891_c0_g1_i1;TRINITY_DN70263_c0_g1_i2;TRINITY_DN73242_c7_g1_i9;TRINITY_DN73594_c1_g1_i2;TRINITY_DN74753_c0_g1_i1;TRINITY_DN74828_c0_g1_i1;TRINITY_DN75152_c3_g2_i1;TRINITY_DN75702_c2_g1_i1;TRINITY_DN76232_c4_g1_i1;TRINITY_DN77283_c0_g1_i4;TRINITY_DN77283_c0_g5_i1;TRINITY_DN77728_c3_g4_i1;TRINITY_DN77976_c1_g1_i2…	http://amigo.geneontology.org/amigo/term/GO:0009617	BP	44
GO:0009113	purine nucleobase biosynthetic process	2/740	15/21795	0.0903066	0.508242	TRINITY_DN74311_c0_g3_i13;TRINITY_DN84703_c6_g1_i1	http://amigo.geneontology.org/amigo/term/GO:0009113	BP	2
GO:0015700	arsenite transport	2/740	15/21795	0.0903066	0.508242	TRINITY_DN79540_c0_g3_i4;TRINITY_DN88582_c7_g2_i10	http://amigo.geneontology.org/amigo/term/GO:0015700	BP	2
GO:0002221	pattern recognition receptor signaling pathway	2/740	15/21795	0.0903066	0.508242	TRINITY_DN80224_c0_g2_i1;TRINITY_DN86288_c3_g4_i1	http://amigo.geneontology.org/amigo/term/GO:0002221	BP	2
GO:0019369	arachidonic acid metabolic process	2/740	15/21795	0.0903066	0.508242	TRINITY_DN82128_c1_g2_i2;TRINITY_DN88823_c0_g3_i1	http://amigo.geneontology.org/amigo/term/GO:0019369	BP	2
GO:0002758	innate immune response-activating signal transduction	2/740	15/21795	0.0903066	0.508242	TRINITY_DN80224_c0_g2_i1;TRINITY_DN86288_c3_g4_i1	http://amigo.geneontology.org/amigo/term/GO:0002758	BP	2
GO:0009639	response to red or far red light	16/740	326/21795	0.0909875	0.508242	TRINITY_DN58158_c0_g1_i1;TRINITY_DN64333_c0_g1_i2;TRINITY_DN70135_c0_g2_i3;TRINITY_DN70433_c0_g1_i3;TRINITY_DN70433_c0_g6_i1;TRINITY_DN71317_c1_g1_i3;TRINITY_DN73152_c1_g3_i1;TRINITY_DN77500_c3_g6_i1;TRINITY_DN81698_c0_g3_i1;TRINITY_DN81851_c0_g2_i8;TRINITY_DN84109_c0_g2_i2;TRINITY_DN87364_c0_g3_i1;TRINITY_DN91863_c1_g3_i1;TRINITY_DN92166_c1_g1_i1;TRINITY_DN93501_c0_g3_i1;TRINITY_DN114980_c0_g1_i1	http://amigo.geneontology.org/amigo/term/GO:0009639	BP	16
GO:0031347	regulation of defense response	19/740	401/21795	0.091465	0.508242	TRINITY_DN64892_c0_g1_i1;TRINITY_DN67988_c0_g1_i1;TRINITY_DN76540_c4_g1_i2;TRINITY_DN77283_c0_g1_i4;TRINITY_DN77283_c0_g5_i1;TRINITY_DN78300_c2_g8_i1;TRINITY_DN79255_c2_g3_i2;TRINITY_DN80224_c0_g2_i1;TRINITY_DN83068_c1_g1_i1;TRINITY_DN85192_c0_g2_i3;TRINITY_DN86288_c3_g4_i1;TRINITY_DN86907_c3_g4_i3;TRINITY_DN88648_c1_g2_i3;TRINITY_DN89843_c3_g1_i1;TRINITY_DN89843_c3_g2_i3;TRINITY_DN91119_c1_g1_i2…	http://amigo.geneontology.org/amigo/term/GO:0031347	BP	19
GO:0009991	response to extracellular stimulus	24/740	528/21795	0.0915456	0.508242	TRINITY_DN43850_c0_g1_i1;TRINITY_DN70525_c3_g2_i1;TRINITY_DN71723_c2_g1_i1;TRINITY_DN72144_c3_g1_i1;TRINITY_DN72450_c1_g5_i2;TRINITY_DN72908_c0_g1_i9;TRINITY_DN75152_c3_g2_i1;TRINITY_DN77891_c0_g1_i1;TRINITY_DN77891_c1_g1_i5;TRINITY_DN81011_c0_g2_i4;TRINITY_DN82498_c1_g1_i6;TRINITY_DN84205_c2_g1_i2;TRINITY_DN87035_c0_g1_i6;TRINITY_DN87659_c0_g1_i4;TRINITY_DN88382_c0_g2_i1;TRINITY_DN89325_c2_g2_i6…	http://amigo.geneontology.org/amigo/term/GO:0009991	BP	24
GO:0006633	fatty acid biosynthetic process	12/740	229/21795	0.0915787	0.508242	TRINITY_DN63938_c0_g1_i1;TRINITY_DN69553_c0_g1_i1;TRINITY_DN70511_c0_g2_i2;TRINITY_DN71012_c0_g1_i1;TRINITY_DN72083_c0_g1_i4;TRINITY_DN73326_c0_g1_i1;TRINITY_DN73326_c0_g3_i3;TRINITY_DN91427_c7_g2_i3;TRINITY_DN91524_c0_g3_i2;TRINITY_DN91524_c0_g4_i2;TRINITY_DN94463_c0_g1_i3;TRINITY_DN95552_c2_g1_i5	http://amigo.geneontology.org/amigo/term/GO:0006633	BP	12
GO:0021700	developmental maturation	12/740	229/21795	0.0915787	0.508242	TRINITY_DN67782_c0_g1_i1;TRINITY_DN73484_c2_g1_i1;TRINITY_DN82276_c1_g3_i1;TRINITY_DN82530_c2_g2_i2;TRINITY_DN83527_c3_g5_i1;TRINITY_DN84017_c0_g8_i1;TRINITY_DN84843_c0_g1_i5;TRINITY_DN89850_c5_g1_i3;TRINITY_DN90446_c3_g2_i3;TRINITY_DN90446_c3_g4_i1;TRINITY_DN91981_c0_g3_i2;TRINITY_DN96833_c1_g1_i8	http://amigo.geneontology.org/amigo/term/GO:0021700	BP	12
GO:0034097	response to cytokine	3/740	32/21795	0.0935482	0.508242	TRINITY_DN80224_c0_g2_i1;TRINITY_DN86288_c3_g4_i1;TRINITY_DN94190_c2_g1_i20	http://amigo.geneontology.org/amigo/term/GO:0034097	BP	3
GO:0001763	morphogenesis of a branching structure	4/740	51/21795	0.09435	0.508242	TRINITY_DN69073_c2_g1_i1;TRINITY_DN85755_c0_g3_i1;TRINITY_DN89614_c0_g3_i2;TRINITY_DN94961_c1_g4_i1	http://amigo.geneontology.org/amigo/term/GO:0001763	BP	4
GO:0008544	epidermis development	24/740	530/21795	0.0944369	0.508242	TRINITY_DN47904_c0_g1_i1;TRINITY_DN67782_c0_g1_i1;TRINITY_DN69993_c2_g2_i1;TRINITY_DN70539_c0_g1_i1;TRINITY_DN73484_c2_g1_i1;TRINITY_DN73781_c4_g8_i1;TRINITY_DN77419_c0_g1_i10;TRINITY_DN78072_c0_g2_i20;TRINITY_DN80331_c0_g6_i1;TRINITY_DN82276_c1_g3_i1;TRINITY_DN82530_c2_g2_i2;TRINITY_DN83527_c3_g5_i1;TRINITY_DN83949_c1_g2_i2;TRINITY_DN84017_c0_g8_i1;TRINITY_DN84843_c0_g1_i5;TRINITY_DN85716_c0_g1_…	http://amigo.geneontology.org/amigo/term/GO:0008544	BP	24
GO:0016310	phosphorylation	52/740	1272/21795	0.094817	0.508242	TRINITY_DN67047_c0_g1_i1;TRINITY_DN69048_c0_g1_i1;TRINITY_DN71012_c0_g1_i1;TRINITY_DN72421_c2_g4_i3;TRINITY_DN72538_c0_g1_i2;TRINITY_DN72765_c0_g1_i1;TRINITY_DN73594_c1_g1_i2;TRINITY_DN74399_c0_g2_i2;TRINITY_DN74802_c4_g3_i1;TRINITY_DN74828_c0_g1_i1;TRINITY_DN77419_c0_g1_i10;TRINITY_DN77570_c2_g2_i2;TRINITY_DN78565_c0_g1_i1;TRINITY_DN79341_c3_g2_i1;TRINITY_DN79458_c0_g1_i8;TRINITY_DN79601_c8_g1_i…	http://amigo.geneontology.org/amigo/term/GO:0016310	BP	52
GO:0034219	carbohydrate transmembrane transport	8/740	137/21795	0.0952951	0.508242	TRINITY_DN68107_c0_g1_i1;TRINITY_DN69901_c0_g2_i2;TRINITY_DN72714_c0_g2_i1;TRINITY_DN80839_c0_g1_i9;TRINITY_DN82761_c0_g1_i6;TRINITY_DN90235_c0_g2_i12;TRINITY_DN91375_c1_g1_i2;TRINITY_DN92375_c1_g2_i4	http://amigo.geneontology.org/amigo/term/GO:0034219	BP	8
GO:0071241	cellular response to inorganic substance	7/740	115/21795	0.0968117	0.508242	TRINITY_DN73821_c5_g2_i1;TRINITY_DN78565_c0_g1_i1;TRINITY_DN79447_c3_g1_i1;TRINITY_DN79971_c0_g2_i4;TRINITY_DN86711_c0_g1_i2;TRINITY_DN89850_c5_g1_i3;TRINITY_DN91622_c0_g2_i1	http://amigo.geneontology.org/amigo/term/GO:0071241	BP	7
GO:0042445	hormone metabolic process	10/740	184/21795	0.0974115	0.508242	TRINITY_DN70135_c0_g2_i3;TRINITY_DN78368_c1_g5_i1;TRINITY_DN78565_c0_g1_i1;TRINITY_DN82731_c0_g4_i2;TRINITY_DN83523_c1_g2_i2;TRINITY_DN87701_c0_g5_i2;TRINITY_DN89409_c1_g3_i3;TRINITY_DN90264_c0_g4_i2;TRINITY_DN92265_c8_g3_i1;TRINITY_DN97255_c3_g3_i1	http://amigo.geneontology.org/amigo/term/GO:0042445	BP	10
GO:0044264	cellular polysaccharide metabolic process	20/740	430/21795	0.0977094	0.508242	TRINITY_DN42865_c0_g1_i2;TRINITY_DN69811_c0_g2_i1;TRINITY_DN70263_c0_g1_i2;TRINITY_DN74169_c0_g7_i1;TRINITY_DN75350_c1_g3_i2;TRINITY_DN76717_c5_g1_i1;TRINITY_DN78940_c0_g4_i2;TRINITY_DN81193_c0_g2_i4;TRINITY_DN81193_c0_g1_i3;TRINITY_DN82953_c1_g1_i7;TRINITY_DN84017_c0_g8_i1;TRINITY_DN84020_c3_g3_i4;TRINITY_DN87396_c1_g3_i1;TRINITY_DN87396_c1_g2_i6;TRINITY_DN89202_c1_g2_i1;TRINITY_DN89202_c1_g4_i1…	http://amigo.geneontology.org/amigo/term/GO:0044264	BP	20
GO:0016049	cell growth	27/740	610/21795	0.0979934	0.508242	TRINITY_DN67782_c0_g1_i1;TRINITY_DN68815_c0_g1_i1;TRINITY_DN68971_c0_g1_i1;TRINITY_DN69048_c0_g1_i1;TRINITY_DN70602_c0_g1_i1;TRINITY_DN70602_c0_g2_i1;TRINITY_DN73033_c0_g3_i1;TRINITY_DN73484_c2_g1_i1;TRINITY_DN75500_c1_g1_i1;TRINITY_DN77419_c0_g1_i10;TRINITY_DN80331_c0_g6_i1;TRINITY_DN80415_c4_g1_i1;TRINITY_DN81327_c0_g2_i2;TRINITY_DN82276_c1_g3_i1;TRINITY_DN82530_c2_g2_i2;TRINITY_DN83527_c3_g5_i…	http://amigo.geneontology.org/amigo/term/GO:0016049	BP	27
GO:0048864	stem cell development	8/740	138/21795	0.098334	0.508242	TRINITY_DN70135_c0_g2_i3;TRINITY_DN71392_c0_g1_i7;TRINITY_DN81280_c0_g1_i1;TRINITY_DN82731_c0_g4_i2;TRINITY_DN85755_c0_g3_i1;TRINITY_DN87015_c1_g5_i3;TRINITY_DN89409_c1_g3_i3;TRINITY_DN92946_c1_g3_i6	http://amigo.geneontology.org/amigo/term/GO:0048864	BP	8
GO:0009735	response to cytokinin	9/740	161/21795	0.0983582	0.508242	TRINITY_DN68559_c0_g1_i2;TRINITY_DN81757_c2_g1_i6;TRINITY_DN82498_c1_g5_i1;TRINITY_DN83197_c0_g1_i2;TRINITY_DN85123_c0_g3_i2;TRINITY_DN86585_c0_g1_i8;TRINITY_DN90446_c3_g2_i3;TRINITY_DN90446_c3_g4_i1;TRINITY_DN95667_c2_g1_i7	http://amigo.geneontology.org/amigo/term/GO:0009735	BP	9
GO:0000282	cellular bud site selection	1/740	3/21795	0.0984434	0.508242	TRINITY_DN75000_c0_g2_i3	http://amigo.geneontology.org/amigo/term/GO:0000282	BP	1
GO:0070534	protein K63-linked ubiquitination	1/740	3/21795	0.0984434	0.508242	TRINITY_DN80224_c0_g2_i1	http://amigo.geneontology.org/amigo/term/GO:0070534	BP	1
GO:0050819	negative regulation of coagulation	1/740	3/21795	0.0984434	0.508242	TRINITY_DN94190_c2_g1_i20	http://amigo.geneontology.org/amigo/term/GO:0050819	BP	1
GO:2000008	regulation of protein localization to cell surface	1/740	3/21795	0.0984434	0.508242	TRINITY_DN80224_c0_g2_i1	http://amigo.geneontology.org/amigo/term/GO:2000008	BP	1
GO:0001890	placenta development	1/740	3/21795	0.0984434	0.508242	TRINITY_DN94190_c2_g1_i20	http://amigo.geneontology.org/amigo/term/GO:0001890	BP	1
GO:0045104	intermediate filament cytoskeleton organization	1/740	3/21795	0.0984434	0.508242	TRINITY_DN94190_c2_g1_i20	http://amigo.geneontology.org/amigo/term/GO:0045104	BP	1
GO:0045103	intermediate filament-based process	1/740	3/21795	0.0984434	0.508242	TRINITY_DN94190_c2_g1_i20	http://amigo.geneontology.org/amigo/term/GO:0045103	BP	1
GO:0010239	chloroplast mRNA processing	1/740	3/21795	0.0984434	0.508242	TRINITY_DN83199_c1_g4_i2	http://amigo.geneontology.org/amigo/term/GO:0010239	BP	1
GO:0010477	response to sulfur dioxide	1/740	3/21795	0.0984434	0.508242	TRINITY_DN75152_c3_g2_i1	http://amigo.geneontology.org/amigo/term/GO:0010477	BP	1
GO:0060173	limb development	1/740	3/21795	0.0984434	0.508242	TRINITY_DN94190_c2_g1_i20	http://amigo.geneontology.org/amigo/term/GO:0060173	BP	1
GO:0060176	regulation of aggregation involved in sorocarp development	1/740	3/21795	0.0984434	0.508242	TRINITY_DN75000_c0_g2_i3	http://amigo.geneontology.org/amigo/term/GO:0060176	BP	1
GO:0046938	phytochelatin biosynthetic process	1/740	3/21795	0.0984434	0.508242	TRINITY_DN88582_c7_g2_i10	http://amigo.geneontology.org/amigo/term/GO:0046938	BP	1
GO:0030216	keratinocyte differentiation	1/740	3/21795	0.0984434	0.508242	TRINITY_DN94190_c2_g1_i20	http://amigo.geneontology.org/amigo/term/GO:0030216	BP	1
GO:0060378	regulation of brood size	1/740	3/21795	0.0984434	0.508242	TRINITY_DN86583_c0_g3_i1	http://amigo.geneontology.org/amigo/term/GO:0060378	BP	1
GO:0052541	plant-type cell wall cellulose metabolic process	1/740	3/21795	0.0984434	0.508242	TRINITY_DN84017_c0_g8_i1	http://amigo.geneontology.org/amigo/term/GO:0052541	BP	1
GO:0007107	membrane addition at site of cytokinesis	1/740	3/21795	0.0984434	0.508242	TRINITY_DN75000_c0_g2_i3	http://amigo.geneontology.org/amigo/term/GO:0007107	BP	1
GO:0031156	regulation of sorocarp development	1/740	3/21795	0.0984434	0.508242	TRINITY_DN75000_c0_g2_i3	http://amigo.geneontology.org/amigo/term/GO:0031156	BP	1
GO:0019322	pentose biosynthetic process	1/740	3/21795	0.0984434	0.508242	TRINITY_DN70951_c0_g1_i9	http://amigo.geneontology.org/amigo/term/GO:0019322	BP	1
GO:0032957	inositol trisphosphate metabolic process	1/740	3/21795	0.0984434	0.508242	TRINITY_DN84005_c0_g1_i6	http://amigo.geneontology.org/amigo/term/GO:0032957	BP	1
GO:0010442	guard cell morphogenesis	1/740	3/21795	0.0984434	0.508242	TRINITY_DN84017_c0_g8_i1	http://amigo.geneontology.org/amigo/term/GO:0010442	BP	1
GO:0007121	bipolar cellular bud site selection	1/740	3/21795	0.0984434	0.508242	TRINITY_DN75000_c0_g2_i3	http://amigo.geneontology.org/amigo/term/GO:0007121	BP	1
GO:0072347	response to anesthetic	1/740	3/21795	0.0984434	0.508242	TRINITY_DN80224_c0_g2_i1	http://amigo.geneontology.org/amigo/term/GO:0072347	BP	1
GO:0006168	adenine salvage	1/740	3/21795	0.0984434	0.508242	TRINITY_DN74311_c0_g3_i13	http://amigo.geneontology.org/amigo/term/GO:0006168	BP	1
GO:0030195	negative regulation of blood coagulation	1/740	3/21795	0.0984434	0.508242	TRINITY_DN94190_c2_g1_i20	http://amigo.geneontology.org/amigo/term/GO:0030195	BP	1
GO:0009727	detection of ethylene stimulus	1/740	3/21795	0.0984434	0.508242	TRINITY_DN78565_c0_g1_i1	http://amigo.geneontology.org/amigo/term/GO:0009727	BP	1
GO:0030855	epithelial cell differentiation	21/740	457/21795	0.100312	0.510313	TRINITY_DN43850_c0_g1_i1;TRINITY_DN47904_c0_g1_i1;TRINITY_DN67782_c0_g1_i1;TRINITY_DN69993_c2_g2_i1;TRINITY_DN70539_c0_g1_i1;TRINITY_DN73484_c2_g1_i1;TRINITY_DN75152_c3_g2_i1;TRINITY_DN78072_c0_g2_i20;TRINITY_DN82276_c1_g3_i1;TRINITY_DN82530_c2_g2_i2;TRINITY_DN83527_c3_g5_i1;TRINITY_DN84017_c0_g8_i1;TRINITY_DN84843_c0_g1_i5;TRINITY_DN85716_c0_g1_i22;TRINITY_DN86643_c1_g4_i3;TRINITY_DN88816_c3_g1_…	http://amigo.geneontology.org/amigo/term/GO:0030855	BP	21
GO:0055080	cation homeostasis	17/740	356/21795	0.10052	0.510313	TRINITY_DN68418_c0_g1_i1;TRINITY_DN70640_c1_g1_i2;TRINITY_DN74269_c0_g3_i1;TRINITY_DN74269_c0_g1_i10;TRINITY_DN77751_c2_g5_i2;TRINITY_DN78762_c0_g4_i13;TRINITY_DN81530_c0_g1_i6;TRINITY_DN81807_c4_g1_i3;TRINITY_DN83913_c3_g5_i1;TRINITY_DN85813_c5_g1_i1;TRINITY_DN87035_c0_g1_i6;TRINITY_DN88917_c3_g2_i1;TRINITY_DN89234_c2_g5_i2;TRINITY_DN89875_c4_g4_i5;TRINITY_DN90136_c5_g5_i2;TRINITY_DN90668_c1_g3_…	http://amigo.geneontology.org/amigo/term/GO:0055080	BP	17
GO:0051054	positive regulation of DNA metabolic process	2/740	16/21795	0.100966	0.510313	TRINITY_DN79180_c4_g2_i1;TRINITY_DN80224_c0_g2_i1	http://amigo.geneontology.org/amigo/term/GO:0051054	BP	2
GO:0050851	antigen receptor-mediated signaling pathway	2/740	16/21795	0.100966	0.510313	TRINITY_DN80224_c0_g2_i1;TRINITY_DN86288_c3_g4_i1	http://amigo.geneontology.org/amigo/term/GO:0050851	BP	2
GO:0050852	T cell receptor signaling pathway	2/740	16/21795	0.100966	0.510313	TRINITY_DN80224_c0_g2_i1;TRINITY_DN86288_c3_g4_i1	http://amigo.geneontology.org/amigo/term/GO:0050852	BP	2
GO:0080148	negative regulation of response to water deprivation	2/740	16/21795	0.100966	0.510313	TRINITY_DN81698_c0_g3_i1;TRINITY_DN114980_c0_g1_i1	http://amigo.geneontology.org/amigo/term/GO:0080148	BP	2
GO:0010120	camalexin biosynthetic process	2/740	16/21795	0.100966	0.510313	TRINITY_DN70602_c0_g2_i1;TRINITY_DN73594_c1_g1_i2	http://amigo.geneontology.org/amigo/term/GO:0010120	BP	2
GO:0005513	detection of calcium ion	2/740	16/21795	0.100966	0.510313	TRINITY_DN65230_c0_g2_i1;TRINITY_DN78762_c0_g4_i13	http://amigo.geneontology.org/amigo/term/GO:0005513	BP	2
GO:0015837	amine transport	2/740	16/21795	0.100966	0.510313	TRINITY_DN67293_c0_g1_i2;TRINITY_DN83281_c0_g1_i3	http://amigo.geneontology.org/amigo/term/GO:0015837	BP	2
GO:0043588	skin development	24/740	535/21795	0.101924	0.514254	TRINITY_DN47904_c0_g1_i1;TRINITY_DN67782_c0_g1_i1;TRINITY_DN69993_c2_g2_i1;TRINITY_DN70539_c0_g1_i1;TRINITY_DN73484_c2_g1_i1;TRINITY_DN73781_c4_g8_i1;TRINITY_DN77419_c0_g1_i10;TRINITY_DN78072_c0_g2_i20;TRINITY_DN80331_c0_g6_i1;TRINITY_DN82276_c1_g3_i1;TRINITY_DN82530_c2_g2_i2;TRINITY_DN83527_c3_g5_i1;TRINITY_DN83949_c1_g2_i2;TRINITY_DN84017_c0_g8_i1;TRINITY_DN84843_c0_g1_i5;TRINITY_DN85716_c0_g1_…	http://amigo.geneontology.org/amigo/term/GO:0043588	BP	24
GO:0019852	L-ascorbic acid metabolic process	5/740	73/21795	0.10214	0.514442	TRINITY_DN49697_c0_g1_i1;TRINITY_DN66170_c0_g1_i1;TRINITY_DN77314_c0_g3_i1;TRINITY_DN77314_c0_g1_i5;TRINITY_DN87313_c1_g1_i9	http://amigo.geneontology.org/amigo/term/GO:0019852	BP	5
GO:0032506	cytokinetic process	7/740	117/21795	0.103643	0.519295	TRINITY_DN75000_c0_g2_i3;TRINITY_DN81193_c0_g2_i4;TRINITY_DN81193_c0_g1_i3;TRINITY_DN89202_c1_g2_i1;TRINITY_DN89202_c1_g4_i1;TRINITY_DN89202_c1_g5_i1;TRINITY_DN89202_c1_g6_i3	http://amigo.geneontology.org/amigo/term/GO:0032506	BP	7
GO:0048765	root hair cell differentiation	9/740	163/21795	0.104092	0.520639	TRINITY_DN67782_c0_g1_i1;TRINITY_DN73484_c2_g1_i1;TRINITY_DN82276_c1_g3_i1;TRINITY_DN82530_c2_g2_i2;TRINITY_DN83527_c3_g5_i1;TRINITY_DN84017_c0_g8_i1;TRINITY_DN84843_c0_g1_i5;TRINITY_DN90446_c3_g2_i3;TRINITY_DN90446_c3_g4_i1	http://amigo.geneontology.org/amigo/term/GO:0048765	BP	9
GO:0052544	defense response by callose deposition in cell wall	6/740	95/21795	0.104317	0.520864	TRINITY_DN66170_c0_g1_i1;TRINITY_DN74828_c0_g1_i1;TRINITY_DN78565_c0_g1_i1;TRINITY_DN86907_c3_g4_i3;TRINITY_DN87313_c1_g1_i9;TRINITY_DN88582_c7_g2_i10	http://amigo.geneontology.org/amigo/term/GO:0052544	BP	6
GO:0043090	amino acid import	3/740	34/21795	0.107512	0.533226	TRINITY_DN74807_c2_g1_i3;TRINITY_DN88544_c0_g3_i4;TRINITY_DN90456_c1_g1_i1	http://amigo.geneontology.org/amigo/term/GO:0043090	BP	3
GO:0010223	secondary shoot formation	3/740	34/21795	0.107512	0.533226	TRINITY_DN85755_c0_g3_i1;TRINITY_DN89614_c0_g3_i2;TRINITY_DN94961_c1_g4_i1	http://amigo.geneontology.org/amigo/term/GO:0010223	BP	3
GO:0006892	post-Golgi vesicle-mediated transport	3/740	34/21795	0.107512	0.533226	TRINITY_DN75000_c0_g2_i3;TRINITY_DN82697_c2_g3_i1;TRINITY_DN86583_c0_g3_i1	http://amigo.geneontology.org/amigo/term/GO:0006892	BP	3
GO:0009814	defense response, incompatible interaction	20/740	437/21795	0.109826	0.542735	TRINITY_DN67443_c0_g1_i2;TRINITY_DN70721_c0_g5_i1;TRINITY_DN70721_c0_g9_i2;TRINITY_DN73594_c1_g1_i2;TRINITY_DN77891_c0_g1_i1;TRINITY_DN77891_c1_g1_i5;TRINITY_DN78300_c2_g8_i1;TRINITY_DN79255_c2_g3_i2;TRINITY_DN79971_c0_g2_i4;TRINITY_DN82278_c3_g5_i1;TRINITY_DN83068_c1_g1_i1;TRINITY_DN84755_c2_g5_i3;TRINITY_DN85192_c0_g2_i3;TRINITY_DN86284_c4_g7_i1;TRINITY_DN86907_c3_g4_i3;TRINITY_DN88648_c1_g2_i3…	http://amigo.geneontology.org/amigo/term/GO:0009814	BP	20
GO:0010817	regulation of hormone levels	21/740	463/21795	0.110497	0.543839	TRINITY_DN70135_c0_g2_i3;TRINITY_DN73594_c1_g1_i2;TRINITY_DN77590_c0_g5_i1;TRINITY_DN77590_c0_g8_i1;TRINITY_DN78368_c1_g5_i1;TRINITY_DN78565_c0_g1_i1;TRINITY_DN79488_c1_g6_i1;TRINITY_DN82731_c0_g4_i2;TRINITY_DN83523_c1_g2_i2;TRINITY_DN85778_c2_g7_i1;TRINITY_DN87701_c0_g5_i2;TRINITY_DN89409_c1_g3_i3;TRINITY_DN90264_c0_g4_i2;TRINITY_DN90446_c3_g2_i3;TRINITY_DN90446_c3_g4_i1;TRINITY_DN92265_c8_g3_i1…	http://amigo.geneontology.org/amigo/term/GO:0010817	BP	21
GO:0010638	positive regulation of organelle organization	4/740	54/21795	0.110551	0.543839	TRINITY_DN66001_c0_g1_i2;TRINITY_DN79180_c4_g2_i1;TRINITY_DN80224_c0_g2_i1;TRINITY_DN90636_c0_g1_i7	http://amigo.geneontology.org/amigo/term/GO:0010638	BP	4
GO:0072593	reactive oxygen species metabolic process	7/740	119/21795	0.110728	0.543839	TRINITY_DN68418_c0_g1_i1;TRINITY_DN77283_c0_g1_i4;TRINITY_DN77283_c0_g5_i1;TRINITY_DN78565_c0_g1_i1;TRINITY_DN81627_c2_g1_i12;TRINITY_DN90204_c2_g3_i5;TRINITY_DN95935_c2_g1_i2	http://amigo.geneontology.org/amigo/term/GO:0072593	BP	7
GO:0006949	syncytium formation	5/740	75/21795	0.111286	0.543839	TRINITY_DN77500_c3_g6_i1;TRINITY_DN90274_c1_g2_i1;TRINITY_DN90274_c1_g8_i1;TRINITY_DN91863_c1_g3_i1;TRINITY_DN93501_c0_g3_i1	http://amigo.geneontology.org/amigo/term/GO:0006949	BP	5
GO:0002429	immune response-activating cell surface receptor signaling pathway	2/740	17/21795	0.111951	0.543839	TRINITY_DN80224_c0_g2_i1;TRINITY_DN86288_c3_g4_i1	http://amigo.geneontology.org/amigo/term/GO:0002429	BP	2
GO:0002768	immune response-regulating cell surface receptor signaling pathway	2/740	17/21795	0.111951	0.543839	TRINITY_DN80224_c0_g2_i1;TRINITY_DN86288_c3_g4_i1	http://amigo.geneontology.org/amigo/term/GO:0002768	BP	2
GO:0031099	regeneration	2/740	17/21795	0.111951	0.543839	TRINITY_DN88654_c0_g2_i8;TRINITY_DN94190_c2_g1_i20	http://amigo.geneontology.org/amigo/term/GO:0031099	BP	2
GO:0006995	cellular response to nitrogen starvation	2/740	17/21795	0.111951	0.543839	TRINITY_DN72908_c0_g1_i9;TRINITY_DN90204_c2_g3_i5	http://amigo.geneontology.org/amigo/term/GO:0006995	BP	2
GO:0051091	positive regulation of sequence-specific DNA binding transcription factor activity	2/740	17/21795	0.111951	0.543839	TRINITY_DN80224_c0_g2_i1;TRINITY_DN86288_c3_g4_i1	http://amigo.geneontology.org/amigo/term/GO:0051091	BP	2
GO:0010109	regulation of photosynthesis	6/740	97/21795	0.11231	0.543839	TRINITY_DN75808_c2_g1_i1;TRINITY_DN77283_c0_g1_i4;TRINITY_DN77283_c0_g5_i1;TRINITY_DN91981_c0_g3_i2;TRINITY_DN95543_c0_g1_i1;TRINITY_DN95543_c1_g3_i1	http://amigo.geneontology.org/amigo/term/GO:0010109	BP	6
GO:0035195	gene silencing by miRNA	6/740	97/21795	0.11231	0.543839	TRINITY_DN68559_c0_g1_i2;TRINITY_DN70135_c0_g2_i3;TRINITY_DN81280_c0_g1_i1;TRINITY_DN86585_c0_g1_i8;TRINITY_DN92454_c3_g1_i1;TRINITY_DN92796_c5_g1_i1	http://amigo.geneontology.org/amigo/term/GO:0035195	BP	6
GO:0050794	regulation of cellular process	187/740	5093/21795	0.115628	0.552306	TRINITY_DN15130_c1_g1_i1;TRINITY_DN43850_c0_g1_i1;TRINITY_DN53892_c1_g1_i1;TRINITY_DN57153_c0_g1_i1;TRINITY_DN62693_c0_g1_i1;TRINITY_DN64892_c0_g1_i1;TRINITY_DN65230_c0_g2_i1;TRINITY_DN65799_c0_g1_i3;TRINITY_DN65780_c0_g1_i2;TRINITY_DN66001_c0_g1_i2;TRINITY_DN66576_c0_g1_i2;TRINITY_DN67047_c0_g1_i1;TRINITY_DN67132_c0_g1_i1;TRINITY_DN67350_c0_g1_i1;TRINITY_DN67712_c0_g1_i2;TRINITY_DN67988_c0_g1_i1…	http://amigo.geneontology.org/amigo/term/GO:0050794	BP	187
GO:0010074	maintenance of meristem identity	5/740	76/21795	0.116003	0.552306	TRINITY_DN71392_c0_g1_i7;TRINITY_DN81280_c0_g1_i1;TRINITY_DN82731_c0_g4_i2;TRINITY_DN85755_c0_g3_i1;TRINITY_DN89409_c1_g3_i3	http://amigo.geneontology.org/amigo/term/GO:0010074	BP	5
GO:0045910	negative regulation of DNA recombination	4/740	55/21795	0.116209	0.552306	TRINITY_DN76437_c5_g2_i1;TRINITY_DN77139_c0_g2_i1;TRINITY_DN77139_c0_g3_i1;TRINITY_DN88013_c3_g8_i1	http://amigo.geneontology.org/amigo/term/GO:0045910	BP	4
GO:0010431	seed maturation	6/740	98/21795	0.116421	0.552306	TRINITY_DN64333_c0_g1_i2;TRINITY_DN71012_c0_g1_i1;TRINITY_DN78940_c0_g4_i2;TRINITY_DN79326_c0_g1_i1;TRINITY_DN90371_c1_g1_i1;TRINITY_DN91657_c1_g7_i1	http://amigo.geneontology.org/amigo/term/GO:0010431	BP	6
GO:0010054	trichoblast differentiation	9/740	168/21795	0.119235	0.552306	TRINITY_DN67782_c0_g1_i1;TRINITY_DN73484_c2_g1_i1;TRINITY_DN82276_c1_g3_i1;TRINITY_DN82530_c2_g2_i2;TRINITY_DN83527_c3_g5_i1;TRINITY_DN84017_c0_g8_i1;TRINITY_DN84843_c0_g1_i5;TRINITY_DN90446_c3_g2_i3;TRINITY_DN90446_c3_g4_i1	http://amigo.geneontology.org/amigo/term/GO:0010054	BP	9
GO:0006325	chromatin organization	15/740	315/21795	0.119289	0.552306	TRINITY_DN71200_c0_g1_i3;TRINITY_DN72421_c2_g4_i3;TRINITY_DN74875_c0_g2_i3;TRINITY_DN75500_c1_g1_i1;TRINITY_DN78980_c2_g2_i3;TRINITY_DN79589_c0_g1_i2;TRINITY_DN80224_c0_g2_i1;TRINITY_DN80567_c0_g6_i1;TRINITY_DN80593_c0_g6_i1;TRINITY_DN80892_c0_g1_i6;TRINITY_DN86713_c0_g5_i3;TRINITY_DN88658_c1_g3_i5;TRINITY_DN89640_c2_g2_i2;TRINITY_DN93466_c1_g3_i1;TRINITY_DN95457_c5_g4_i1	http://amigo.geneontology.org/amigo/term/GO:0006325	BP	15
GO:0034284	response to monosaccharide	6/740	99/21795	0.120605	0.552306	TRINITY_DN66576_c0_g1_i2;TRINITY_DN69811_c0_g2_i1;TRINITY_DN71723_c2_g1_i1;TRINITY_DN91657_c1_g7_i1;TRINITY_DN91981_c0_g3_i2;TRINITY_DN92577_c0_g1_i5	http://amigo.geneontology.org/amigo/term/GO:0034284	BP	6
GO:0071369	cellular response to ethylene stimulus	6/740	99/21795	0.120605	0.552306	TRINITY_DN70682_c0_g1_i1;TRINITY_DN73594_c1_g1_i2;TRINITY_DN75000_c0_g2_i3;TRINITY_DN79602_c0_g1_i2;TRINITY_DN81627_c2_g1_i12;TRINITY_DN93265_c2_g2_i1	http://amigo.geneontology.org/amigo/term/GO:0071369	BP	6
GO:0005984	disaccharide metabolic process	7/740	122/21795	0.121823	0.552306	TRINITY_DN42865_c0_g1_i2;TRINITY_DN70263_c0_g1_i2;TRINITY_DN76717_c5_g1_i1;TRINITY_DN78940_c0_g4_i2;TRINITY_DN82953_c1_g1_i7;TRINITY_DN91657_c1_g7_i1;TRINITY_DN94133_c0_g1_i8	http://amigo.geneontology.org/amigo/term/GO:0005984	BP	7
GO:0048364	root development	33/740	785/21795	0.122006	0.552306	TRINITY_DN67782_c0_g1_i1;TRINITY_DN69811_c0_g2_i1;TRINITY_DN70135_c0_g2_i3;TRINITY_DN73484_c2_g1_i1;TRINITY_DN73792_c0_g1_i3;TRINITY_DN73821_c5_g2_i1;TRINITY_DN75510_c0_g5_i4;TRINITY_DN76571_c0_g1_i2;TRINITY_DN78637_c1_g1_i3;TRINITY_DN79224_c0_g1_i6;TRINITY_DN81443_c1_g2_i6;TRINITY_DN81698_c0_g3_i1;TRINITY_DN82276_c1_g3_i1;TRINITY_DN82530_c2_g2_i2;TRINITY_DN82697_c2_g3_i1;TRINITY_DN82731_c0_g4_i2…	http://amigo.geneontology.org/amigo/term/GO:0048364	BP	33
GO:0010359	regulation of anion channel activity	3/740	36/21795	0.122227	0.552306	TRINITY_DN74828_c0_g1_i1;TRINITY_DN77570_c2_g2_i2;TRINITY_DN80442_c2_g1_i2	http://amigo.geneontology.org/amigo/term/GO:0010359	BP	3
GO:0016570	histone modification	10/740	193/21795	0.122519	0.552306	TRINITY_DN72421_c2_g4_i3;TRINITY_DN74875_c0_g2_i3;TRINITY_DN75500_c1_g1_i1;TRINITY_DN78980_c2_g2_i3;TRINITY_DN79589_c0_g1_i2;TRINITY_DN80224_c0_g2_i1;TRINITY_DN80593_c0_g6_i1;TRINITY_DN80892_c0_g1_i6;TRINITY_DN89640_c2_g2_i2;TRINITY_DN93466_c1_g3_i1	http://amigo.geneontology.org/amigo/term/GO:0016570	BP	10
GO:0006515	protein quality control by the ubiquitin-proteasome system	2/740	18/21795	0.123228	0.552306	TRINITY_DN89072_c0_g1_i1;TRINITY_DN92311_c0_g4_i4	http://amigo.geneontology.org/amigo/term/GO:0006515	BP	2
GO:0032025	response to cobalt ion	2/740	18/21795	0.123228	0.552306	TRINITY_DN89234_c2_g5_i2;TRINITY_DN90668_c1_g3_i1	http://amigo.geneontology.org/amigo/term/GO:0032025	BP	2
GO:0030308	negative regulation of cell growth	2/740	18/21795	0.123228	0.552306	TRINITY_DN68780_c0_g2_i2;TRINITY_DN88654_c0_g2_i8	http://amigo.geneontology.org/amigo/term/GO:0030308	BP	2
GO:0080029	cellular response to boron-containing substance levels	2/740	18/21795	0.123228	0.552306	TRINITY_DN91375_c1_g1_i2;TRINITY_DN93749_c0_g1_i3	http://amigo.geneontology.org/amigo/term/GO:0080029	BP	2
GO:0048582	positive regulation of post-embryonic development	8/740	146/21795	0.124571	0.552306	TRINITY_DN62693_c0_g1_i1;TRINITY_DN67970_c1_g1_i1;TRINITY_DN73294_c5_g2_i2;TRINITY_DN78441_c2_g1_i5;TRINITY_DN79447_c3_g1_i1;TRINITY_DN85344_c1_g3_i2;TRINITY_DN93504_c0_g1_i1;TRINITY_DN93786_c0_g2_i1	http://amigo.geneontology.org/amigo/term/GO:0048582	BP	8
GO:0022622	root system development	33/740	787/21795	0.12489	0.552306	TRINITY_DN67782_c0_g1_i1;TRINITY_DN69811_c0_g2_i1;TRINITY_DN70135_c0_g2_i3;TRINITY_DN73484_c2_g1_i1;TRINITY_DN73792_c0_g1_i3;TRINITY_DN73821_c5_g2_i1;TRINITY_DN75510_c0_g5_i4;TRINITY_DN76571_c0_g1_i2;TRINITY_DN78637_c1_g1_i3;TRINITY_DN79224_c0_g1_i6;TRINITY_DN81443_c1_g2_i6;TRINITY_DN81698_c0_g3_i1;TRINITY_DN82276_c1_g3_i1;TRINITY_DN82530_c2_g2_i2;TRINITY_DN82697_c2_g3_i1;TRINITY_DN82731_c0_g4_i2…	http://amigo.geneontology.org/amigo/term/GO:0022622	BP	33
GO:0051171	regulation of nitrogen compound metabolic process	93/740	2438/21795	0.125155	0.552306	TRINITY_DN62693_c0_g1_i1;TRINITY_DN65799_c0_g1_i3;TRINITY_DN65780_c0_g1_i2;TRINITY_DN66576_c0_g1_i2;TRINITY_DN67132_c0_g1_i1;TRINITY_DN67350_c0_g1_i1;TRINITY_DN67712_c0_g1_i2;TRINITY_DN68539_c0_g1_i1;TRINITY_DN68780_c0_g2_i2;TRINITY_DN68775_c1_g1_i1;TRINITY_DN68815_c0_g1_i1;TRINITY_DN68924_c0_g3_i1;TRINITY_DN69537_c0_g2_i1;TRINITY_DN69811_c0_g2_i1;TRINITY_DN70539_c0_g1_i1;TRINITY_DN70602_c0_g2_i1…	http://amigo.geneontology.org/amigo/term/GO:0051171	BP	93
GO:0005983	starch catabolic process	5/740	78/21795	0.125716	0.552306	TRINITY_DN42865_c0_g1_i2;TRINITY_DN69811_c0_g2_i1;TRINITY_DN76717_c5_g1_i1;TRINITY_DN82953_c1_g1_i7;TRINITY_DN94133_c0_g1_i8	http://amigo.geneontology.org/amigo/term/GO:0005983	BP	5
GO:0010214	seed coat development	4/740	57/21795	0.127894	0.552306	TRINITY_DN70539_c0_g1_i1;TRINITY_DN76793_c1_g1_i2;TRINITY_DN79447_c3_g1_i1;TRINITY_DN95457_c5_g4_i1	http://amigo.geneontology.org/amigo/term/GO:0010214	BP	4
GO:2000241	regulation of reproductive process	20/740	447/21795	0.128683	0.552306	TRINITY_DN62693_c0_g1_i1;TRINITY_DN67020_c0_g1_i1;TRINITY_DN67970_c1_g1_i1;TRINITY_DN74875_c0_g2_i3;TRINITY_DN75000_c0_g2_i3;TRINITY_DN75500_c1_g1_i1;TRINITY_DN76233_c0_g1_i1;TRINITY_DN76957_c0_g4_i4;TRINITY_DN77570_c2_g2_i2;TRINITY_DN78441_c2_g1_i5;TRINITY_DN86357_c6_g4_i1;TRINITY_DN86713_c0_g5_i3;TRINITY_DN86927_c4_g1_i2;TRINITY_DN91119_c1_g1_i2;TRINITY_DN92796_c5_g1_i1;TRINITY_DN93265_c3_g1_i2…	http://amigo.geneontology.org/amigo/term/GO:2000241	BP	20
GO:0046084	adenine biosynthetic process	1/740	4/21795	0.129058	0.552306	TRINITY_DN74311_c0_g3_i13	http://amigo.geneontology.org/amigo/term/GO:0046084	BP	1
GO:0071398	cellular response to fatty acid	1/740	4/21795	0.129058	0.552306	TRINITY_DN76129_c4_g2_i1	http://amigo.geneontology.org/amigo/term/GO:0071398	BP	1
GO:0008344	adult locomotory behavior	1/740	4/21795	0.129058	0.552306	TRINITY_DN80224_c0_g2_i1	http://amigo.geneontology.org/amigo/term/GO:0008344	BP	1
GO:0019354	siroheme biosynthetic process	1/740	4/21795	0.129058	0.552306	TRINITY_DN79615_c0_g4_i2	http://amigo.geneontology.org/amigo/term/GO:0019354	BP	1
GO:0050678	regulation of epithelial cell proliferation	1/740	4/21795	0.129058	0.552306	TRINITY_DN94190_c2_g1_i20	http://amigo.geneontology.org/amigo/term/GO:0050678	BP	1
GO:0035147	branch fusion, open tracheal system	1/740	4/21795	0.129058	0.552306	TRINITY_DN69073_c2_g1_i1	http://amigo.geneontology.org/amigo/term/GO:0035147	BP	1
GO:0046856	phosphatidylinositol dephosphorylation	1/740	4/21795	0.129058	0.552306	TRINITY_DN83157_c6_g4_i1	http://amigo.geneontology.org/amigo/term/GO:0046856	BP	1
GO:0043403	skeletal muscle tissue regeneration	1/740	4/21795	0.129058	0.552306	TRINITY_DN88654_c0_g2_i8	http://amigo.geneontology.org/amigo/term/GO:0043403	BP	1
GO:0046839	phospholipid dephosphorylation	1/740	4/21795	0.129058	0.552306	TRINITY_DN83157_c6_g4_i1	http://amigo.geneontology.org/amigo/term/GO:0046839	BP	1
GO:0071497	cellular response to freezing	1/740	4/21795	0.129058	0.552306	TRINITY_DN72127_c0_g4_i3	http://amigo.geneontology.org/amigo/term/GO:0071497	BP	1
GO:0070542	response to fatty acid	1/740	4/21795	0.129058	0.552306	TRINITY_DN76129_c4_g2_i1	http://amigo.geneontology.org/amigo/term/GO:0070542	BP	1
GO:0071385	cellular response to glucocorticoid stimulus	1/740	4/21795	0.129058	0.552306	TRINITY_DN75152_c3_g2_i1	http://amigo.geneontology.org/amigo/term/GO:0071385	BP	1
GO:0071384	cellular response to corticosteroid stimulus	1/740	4/21795	0.129058	0.552306	TRINITY_DN75152_c3_g2_i1	http://amigo.geneontology.org/amigo/term/GO:0071384	BP	1
GO:0080120	CAAX-box protein maturation	1/740	4/21795	0.129058	0.552306	TRINITY_DN75205_c1_g6_i1	http://amigo.geneontology.org/amigo/term/GO:0080120	BP	1
GO:0080113	regulation of seed growth	1/740	4/21795	0.129058	0.552306	TRINITY_DN67020_c0_g1_i1	http://amigo.geneontology.org/amigo/term/GO:0080113	BP	1
GO:0032526	response to retinoic acid	1/740	4/21795	0.129058	0.552306	TRINITY_DN75152_c3_g2_i1	http://amigo.geneontology.org/amigo/term/GO:0032526	BP	1
GO:0034434	sterol esterification	1/740	4/21795	0.129058	0.552306	TRINITY_DN95812_c1_g1_i9	http://amigo.geneontology.org/amigo/term/GO:0034434	BP	1
GO:0070483	detection of hypoxia	1/740	4/21795	0.129058	0.552306	TRINITY_DN75772_c1_g2_i5	http://amigo.geneontology.org/amigo/term/GO:0070483	BP	1
GO:0005986	sucrose biosynthetic process	1/740	4/21795	0.129058	0.552306	TRINITY_DN70263_c0_g1_i2	http://amigo.geneontology.org/amigo/term/GO:0005986	BP	1
GO:0010495	long-distance posttranscriptional gene silencing	1/740	4/21795	0.129058	0.552306	TRINITY_DN88658_c1_g3_i5	http://amigo.geneontology.org/amigo/term/GO:0010495	BP	1
GO:1901183	positive regulation of camalexin biosynthetic process	1/740	4/21795	0.129058	0.552306	TRINITY_DN70602_c0_g2_i1	http://amigo.geneontology.org/amigo/term/GO:1901183	BP	1
GO:0033306	phytol metabolic process	1/740	4/21795	0.129058	0.552306	TRINITY_DN68864_c0_g1_i6	http://amigo.geneontology.org/amigo/term/GO:0033306	BP	1
GO:0072376	protein activation cascade	1/740	4/21795	0.129058	0.552306	TRINITY_DN94190_c2_g1_i20	http://amigo.geneontology.org/amigo/term/GO:0072376	BP	1
GO:0015783	GDP-fucose transport	1/740	4/21795	0.129058	0.552306	TRINITY_DN82761_c0_g1_i6	http://amigo.geneontology.org/amigo/term/GO:0015783	BP	1
GO:0007044	cell-substrate junction assembly	1/740	4/21795	0.129058	0.552306	TRINITY_DN94190_c2_g1_i20	http://amigo.geneontology.org/amigo/term/GO:0007044	BP	1
GO:0010994	free ubiquitin chain polymerization	1/740	4/21795	0.129058	0.552306	TRINITY_DN80224_c0_g2_i1	http://amigo.geneontology.org/amigo/term/GO:0010994	BP	1
GO:0048480	stigma development	1/740	4/21795	0.129058	0.552306	TRINITY_DN72627_c2_g1_i3	http://amigo.geneontology.org/amigo/term/GO:0048480	BP	1
GO:0046686	response to cadmium ion	55/740	1387/21795	0.129228	0.552306	TRINITY_DN63681_c0_g1_i1;TRINITY_DN65778_c0_g1_i1;TRINITY_DN66297_c0_g1_i1;TRINITY_DN71012_c0_g1_i1;TRINITY_DN71323_c1_g3_i5;TRINITY_DN72144_c3_g1_i1;TRINITY_DN73577_c5_g1_i1;TRINITY_DN73888_c0_g3_i2;TRINITY_DN75177_c2_g3_i2;TRINITY_DN75350_c1_g3_i2;TRINITY_DN76437_c5_g2_i1;TRINITY_DN76870_c0_g2_i4;TRINITY_DN77139_c0_g2_i1;TRINITY_DN77139_c0_g3_i1;TRINITY_DN77891_c0_g1_i1;TRINITY_DN77891_c1_g1_i5…	http://amigo.geneontology.org/amigo/term/GO:0046686	BP	55
GO:0045596	negative regulation of cell differentiation	7/740	124/21795	0.129525	0.552306	TRINITY_DN71392_c0_g1_i7;TRINITY_DN81280_c0_g1_i1;TRINITY_DN82731_c0_g4_i2;TRINITY_DN85755_c0_g3_i1;TRINITY_DN87015_c1_g5_i3;TRINITY_DN89409_c1_g3_i3;TRINITY_DN92946_c1_g3_i6	http://amigo.geneontology.org/amigo/term/GO:0045596	BP	7
GO:0000122	negative regulation of transcription from RNA polymerase II promoter	3/740	37/21795	0.129845	0.552306	TRINITY_DN71772_c1_g1_i1;TRINITY_DN86288_c3_g4_i1;TRINITY_DN88654_c0_g2_i8	http://amigo.geneontology.org/amigo/term/GO:0000122	BP	3
GO:0071370	cellular response to gibberellin stimulus	5/740	79/21795	0.130709	0.552306	TRINITY_DN57153_c0_g1_i1;TRINITY_DN71392_c0_g1_i7;TRINITY_DN71536_c0_g1_i2;TRINITY_DN71536_c0_g2_i4;TRINITY_DN93473_c3_g1_i1	http://amigo.geneontology.org/amigo/term/GO:0071370	BP	5
GO:0042023	DNA endoreduplication	5/740	79/21795	0.130709	0.552306	TRINITY_DN77419_c0_g1_i10;TRINITY_DN80331_c0_g6_i1;TRINITY_DN83949_c1_g2_i2;TRINITY_DN85716_c0_g1_i22;TRINITY_DN89459_c0_g1_i5	http://amigo.geneontology.org/amigo/term/GO:0042023	BP	5
GO:0007166	cell surface receptor signaling pathway	8/740	148/21795	0.131653	0.555481	TRINITY_DN71772_c1_g1_i1;TRINITY_DN73631_c1_g2_i1;TRINITY_DN74399_c0_g2_i2;TRINITY_DN74828_c0_g1_i1;TRINITY_DN80224_c0_g2_i1;TRINITY_DN86288_c3_g4_i1;TRINITY_DN93709_c2_g6_i1;TRINITY_DN94190_c2_g1_i20	http://amigo.geneontology.org/amigo/term/GO:0007166	BP	8
GO:0010468	regulation of gene expression	98/740	2587/21795	0.132507	0.555606	TRINITY_DN62693_c0_g1_i1;TRINITY_DN65799_c0_g1_i3;TRINITY_DN65780_c0_g1_i2;TRINITY_DN66576_c0_g1_i2;TRINITY_DN67132_c0_g1_i1;TRINITY_DN67350_c0_g1_i1;TRINITY_DN67712_c0_g1_i2;TRINITY_DN68539_c0_g1_i1;TRINITY_DN68559_c0_g1_i2;TRINITY_DN68780_c0_g2_i2;TRINITY_DN68775_c1_g1_i1;TRINITY_DN68924_c0_g3_i1;TRINITY_DN69537_c0_g2_i1;TRINITY_DN69811_c0_g2_i1;TRINITY_DN70135_c0_g2_i3;TRINITY_DN70539_c0_g1_i1…	http://amigo.geneontology.org/amigo/term/GO:0010468	BP	98
GO:0009909	regulation of flower development	15/740	321/21795	0.133252	0.555606	TRINITY_DN62693_c0_g1_i1;TRINITY_DN67970_c1_g1_i1;TRINITY_DN74875_c0_g2_i3;TRINITY_DN76957_c0_g4_i4;TRINITY_DN78441_c2_g1_i5;TRINITY_DN86357_c6_g4_i1;TRINITY_DN86713_c0_g5_i3;TRINITY_DN86927_c4_g1_i2;TRINITY_DN91119_c1_g1_i2;TRINITY_DN92796_c5_g1_i1;TRINITY_DN93265_c3_g1_i2;TRINITY_DN93466_c1_g3_i1;TRINITY_DN93786_c0_g2_i1;TRINITY_DN94882_c0_g4_i1;TRINITY_DN95457_c5_g4_i1	http://amigo.geneontology.org/amigo/term/GO:0009909	BP	15
GO:0033037	polysaccharide localization	7/740	125/21795	0.133465	0.555606	TRINITY_DN66170_c0_g1_i1;TRINITY_DN74828_c0_g1_i1;TRINITY_DN78565_c0_g1_i1;TRINITY_DN81627_c2_g1_i12;TRINITY_DN86907_c3_g4_i3;TRINITY_DN87313_c1_g1_i9;TRINITY_DN88582_c7_g2_i10	http://amigo.geneontology.org/amigo/term/GO:0033037	BP	7
GO:0007167	enzyme linked receptor protein signaling pathway	6/740	102/21795	0.133596	0.555606	TRINITY_DN71772_c1_g1_i1;TRINITY_DN73631_c1_g2_i1;TRINITY_DN74399_c0_g2_i2;TRINITY_DN74828_c0_g1_i1;TRINITY_DN86288_c3_g4_i1;TRINITY_DN93709_c2_g6_i1	http://amigo.geneontology.org/amigo/term/GO:0007167	BP	6
GO:0052386	cell wall thickening	6/740	102/21795	0.133596	0.555606	TRINITY_DN66170_c0_g1_i1;TRINITY_DN74828_c0_g1_i1;TRINITY_DN78565_c0_g1_i1;TRINITY_DN86907_c3_g4_i3;TRINITY_DN87313_c1_g1_i9;TRINITY_DN88582_c7_g2_i10	http://amigo.geneontology.org/amigo/term/GO:0052386	BP	6
GO:0052543	callose deposition in cell wall	6/740	102/21795	0.133596	0.555606	TRINITY_DN66170_c0_g1_i1;TRINITY_DN74828_c0_g1_i1;TRINITY_DN78565_c0_g1_i1;TRINITY_DN86907_c3_g4_i3;TRINITY_DN87313_c1_g1_i9;TRINITY_DN88582_c7_g2_i10	http://amigo.geneontology.org/amigo/term/GO:0052543	BP	6
GO:0048449	floral organ formation	4/740	58/21795	0.133914	0.555606	TRINITY_DN62693_c0_g1_i1;TRINITY_DN67350_c0_g1_i1;TRINITY_DN71355_c0_g1_i1;TRINITY_DN92796_c5_g1_i1	http://amigo.geneontology.org/amigo/term/GO:0048449	BP	4
GO:0051252	regulation of RNA metabolic process	83/740	2168/21795	0.133948	0.555606	TRINITY_DN62693_c0_g1_i1;TRINITY_DN65799_c0_g1_i3;TRINITY_DN65780_c0_g1_i2;TRINITY_DN66576_c0_g1_i2;TRINITY_DN67132_c0_g1_i1;TRINITY_DN67350_c0_g1_i1;TRINITY_DN67712_c0_g1_i2;TRINITY_DN68539_c0_g1_i1;TRINITY_DN68780_c0_g2_i2;TRINITY_DN68775_c1_g1_i1;TRINITY_DN68924_c0_g3_i1;TRINITY_DN69537_c0_g2_i1;TRINITY_DN69811_c0_g2_i1;TRINITY_DN70539_c0_g1_i1;TRINITY_DN70682_c0_g1_i1;TRINITY_DN70871_c0_g1_i1…	http://amigo.geneontology.org/amigo/term/GO:0051252	BP	83
GO:2000026	regulation of multicellular organismal development	36/740	874/21795	0.134407	0.555606	TRINITY_DN53892_c1_g1_i1;TRINITY_DN57153_c0_g1_i1;TRINITY_DN62693_c0_g1_i1;TRINITY_DN65230_c0_g2_i1;TRINITY_DN67020_c0_g1_i1;TRINITY_DN67970_c1_g1_i1;TRINITY_DN68780_c0_g2_i2;TRINITY_DN70640_c1_g1_i2;TRINITY_DN72421_c2_g4_i3;TRINITY_DN73294_c5_g2_i2;TRINITY_DN74875_c0_g2_i3;TRINITY_DN75000_c0_g2_i3;TRINITY_DN75500_c1_g1_i1;TRINITY_DN76957_c0_g4_i4;TRINITY_DN78441_c2_g1_i5;TRINITY_DN78565_c0_g1_i1…	http://amigo.geneontology.org/amigo/term/GO:2000026	BP	36
GO:0046713	borate transport	2/740	19/21795	0.134762	0.555606	TRINITY_DN91375_c1_g1_i2;TRINITY_DN93749_c0_g1_i3	http://amigo.geneontology.org/amigo/term/GO:0046713	BP	2
GO:0052314	phytoalexin metabolic process	2/740	19/21795	0.134762	0.555606	TRINITY_DN70602_c0_g2_i1;TRINITY_DN73594_c1_g1_i2	http://amigo.geneontology.org/amigo/term/GO:0052314	BP	2
GO:0035445	borate transmembrane transport	2/740	19/21795	0.134762	0.555606	TRINITY_DN91375_c1_g1_i2;TRINITY_DN93749_c0_g1_i3	http://amigo.geneontology.org/amigo/term/GO:0035445	BP	2
GO:0008333	endosome to lysosome transport	2/740	19/21795	0.134762	0.555606	TRINITY_DN74186_c0_g1_i3;TRINITY_DN82697_c2_g3_i1	http://amigo.geneontology.org/amigo/term/GO:0008333	BP	2
GO:1900150	regulation of defense response to fungus	2/740	19/21795	0.134762	0.555606	TRINITY_DN64892_c0_g1_i1;TRINITY_DN67988_c0_g1_i1	http://amigo.geneontology.org/amigo/term/GO:1900150	BP	2
GO:0009700	indole phytoalexin biosynthetic process	2/740	19/21795	0.134762	0.555606	TRINITY_DN70602_c0_g2_i1;TRINITY_DN73594_c1_g1_i2	http://amigo.geneontology.org/amigo/term/GO:0009700	BP	2
GO:0031058	positive regulation of histone modification	2/740	19/21795	0.134762	0.555606	TRINITY_DN66001_c0_g1_i2;TRINITY_DN80224_c0_g2_i1	http://amigo.geneontology.org/amigo/term/GO:0031058	BP	2
GO:0002218	activation of innate immune response	4/740	59/21795	0.140047	0.572489	TRINITY_DN77283_c0_g1_i4;TRINITY_DN77283_c0_g5_i1;TRINITY_DN80224_c0_g2_i1;TRINITY_DN86288_c3_g4_i1	http://amigo.geneontology.org/amigo/term/GO:0002218	BP	4
GO:0044786	cell cycle DNA replication	5/740	81/21795	0.140956	0.573772	TRINITY_DN77419_c0_g1_i10;TRINITY_DN80331_c0_g6_i1;TRINITY_DN83949_c1_g2_i2;TRINITY_DN85716_c0_g1_i22;TRINITY_DN89459_c0_g1_i5	http://amigo.geneontology.org/amigo/term/GO:0044786	BP	5
GO:0009734	auxin-activated signaling pathway	11/740	224/21795	0.142158	0.577842	TRINITY_DN15130_c1_g1_i1;TRINITY_DN70602_c0_g1_i1;TRINITY_DN70602_c0_g2_i1;TRINITY_DN74399_c0_g2_i2;TRINITY_DN79601_c8_g1_i4;TRINITY_DN85778_c2_g7_i1;TRINITY_DN88884_c0_g1_i1;TRINITY_DN89850_c5_g1_i3;TRINITY_DN90446_c3_g2_i3;TRINITY_DN90446_c3_g4_i1;TRINITY_DN92713_c1_g5_i1	http://amigo.geneontology.org/amigo/term/GO:0009734	BP	11
GO:0010608	posttranscriptional regulation of gene expression	17/740	376/21795	0.142418	0.578086	TRINITY_DN65799_c0_g1_i3;TRINITY_DN68559_c0_g1_i2;TRINITY_DN70135_c0_g2_i3;TRINITY_DN71200_c0_g1_i3;TRINITY_DN77123_c1_g2_i8;TRINITY_DN77451_c0_g4_i1;TRINITY_DN80086_c0_g1_i1;TRINITY_DN81280_c0_g1_i1;TRINITY_DN84723_c0_g4_i1;TRINITY_DN85827_c2_g1_i4;TRINITY_DN86585_c0_g1_i8;TRINITY_DN88658_c1_g3_i5;TRINITY_DN92454_c3_g1_i1;TRINITY_DN92796_c5_g1_i1;TRINITY_DN93493_c1_g2_i5;TRINITY_DN94190_c2_g1_i2…	http://amigo.geneontology.org/amigo/term/GO:0010608	BP	17
GO:0031348	negative regulation of defense response	10/740	200/21795	0.144277	0.582778	TRINITY_DN78300_c2_g8_i1;TRINITY_DN79255_c2_g3_i2;TRINITY_DN83068_c1_g1_i1;TRINITY_DN85192_c0_g2_i3;TRINITY_DN86907_c3_g4_i3;TRINITY_DN88648_c1_g2_i3;TRINITY_DN89843_c3_g1_i1;TRINITY_DN89843_c3_g2_i3;TRINITY_DN94882_c0_g4_i1;TRINITY_DN96995_c4_g4_i1	http://amigo.geneontology.org/amigo/term/GO:0031348	BP	10
GO:0009892	negative regulation of metabolic process	39/740	962/21795	0.144382	0.582778	TRINITY_DN53892_c1_g1_i1;TRINITY_DN65780_c0_g1_i2;TRINITY_DN66001_c0_g1_i2;TRINITY_DN68559_c0_g1_i2;TRINITY_DN70135_c0_g2_i3;TRINITY_DN70682_c0_g1_i1;TRINITY_DN71200_c0_g1_i3;TRINITY_DN71557_c0_g1_i11;TRINITY_DN71772_c1_g1_i1;TRINITY_DN74039_c0_g2_i1;TRINITY_DN75808_c2_g1_i1;TRINITY_DN75913_c2_g1_i8;TRINITY_DN76437_c5_g2_i1;TRINITY_DN76557_c0_g2_i4;TRINITY_DN76557_c0_g5_i1;TRINITY_DN77123_c1_g2_i…	http://amigo.geneontology.org/amigo/term/GO:0009892	BP	39
GO:0009658	chloroplast organization	11/740	225/21795	0.1452	0.584077	TRINITY_DN65799_c0_g1_i3;TRINITY_DN71317_c1_g1_i3;TRINITY_DN71954_c3_g8_i3;TRINITY_DN77953_c1_g1_i1;TRINITY_DN79458_c0_g1_i8;TRINITY_DN81632_c1_g4_i2;TRINITY_DN83199_c1_g4_i2;TRINITY_DN84703_c6_g1_i1;TRINITY_DN87241_c2_g1_i1;TRINITY_DN92530_c0_g2_i4;TRINITY_DN97059_c7_g1_i1	http://amigo.geneontology.org/amigo/term/GO:0009658	BP	11
GO:0002237	response to molecule of bacterial origin	3/740	39/21795	0.145561	0.584077	TRINITY_DN75152_c3_g2_i1;TRINITY_DN78565_c0_g1_i1;TRINITY_DN89850_c5_g1_i3	http://amigo.geneontology.org/amigo/term/GO:0002237	BP	3
GO:0031349	positive regulation of defense response	5/740	82/21795	0.146208	0.584077	TRINITY_DN77283_c0_g1_i4;TRINITY_DN77283_c0_g5_i1;TRINITY_DN80224_c0_g2_i1;TRINITY_DN86288_c3_g4_i1;TRINITY_DN91119_c1_g1_i2	http://amigo.geneontology.org/amigo/term/GO:0031349	BP	5
GO:1900376	regulation of secondary metabolite biosynthetic process	4/740	60/21795	0.14629	0.584077	TRINITY_DN70602_c0_g2_i1;TRINITY_DN74963_c1_g2_i1;TRINITY_DN86643_c1_g4_i3;TRINITY_DN86907_c3_g4_i3	http://amigo.geneontology.org/amigo/term/GO:1900376	BP	4
GO:0048863	stem cell differentiation	8/740	152/21795	0.146417	0.584077	TRINITY_DN70135_c0_g2_i3;TRINITY_DN71392_c0_g1_i7;TRINITY_DN81280_c0_g1_i1;TRINITY_DN82731_c0_g4_i2;TRINITY_DN85755_c0_g3_i1;TRINITY_DN87015_c1_g5_i3;TRINITY_DN89409_c1_g3_i3;TRINITY_DN92946_c1_g3_i6	http://amigo.geneontology.org/amigo/term/GO:0048863	BP	8
GO:0080110	sporopollenin biosynthetic process	2/740	20/21795	0.146525	0.584077	TRINITY_DN85193_c1_g1_i5;TRINITY_DN212533_c0_g1_i1	http://amigo.geneontology.org/amigo/term/GO:0080110	BP	2
GO:0008300	isoprenoid catabolic process	2/740	20/21795	0.146525	0.584077	TRINITY_DN73481_c7_g1_i1;TRINITY_DN73693_c0_g3_i2	http://amigo.geneontology.org/amigo/term/GO:0008300	BP	2
GO:0010231	maintenance of seed dormancy	2/740	20/21795	0.146525	0.584077	TRINITY_DN79326_c0_g1_i1;TRINITY_DN90371_c1_g1_i1	http://amigo.geneontology.org/amigo/term/GO:0010231	BP	2
GO:0048645	animal organ formation	11/740	226/21795	0.148277	0.589972	TRINITY_DN62693_c0_g1_i1;TRINITY_DN67350_c0_g1_i1;TRINITY_DN71355_c0_g1_i1;TRINITY_DN72838_c0_g1_i11;TRINITY_DN73792_c0_g1_i3;TRINITY_DN75510_c0_g5_i4;TRINITY_DN78637_c1_g1_i3;TRINITY_DN80567_c0_g6_i1;TRINITY_DN85439_c1_g1_i2;TRINITY_DN85755_c0_g3_i1;TRINITY_DN92796_c5_g1_i1	http://amigo.geneontology.org/amigo/term/GO:0048645	BP	11
GO:0003006	developmental process involved in reproduction	89/740	2352/21795	0.148936	0.589972	TRINITY_DN19531_c0_g1_i1;TRINITY_DN43850_c0_g1_i1;TRINITY_DN62693_c0_g1_i1;TRINITY_DN63938_c0_g1_i1;TRINITY_DN64333_c0_g1_i2;TRINITY_DN66001_c0_g1_i2;TRINITY_DN67020_c0_g1_i1;TRINITY_DN67047_c0_g1_i1;TRINITY_DN67350_c0_g1_i1;TRINITY_DN68780_c0_g2_i2;TRINITY_DN68775_c1_g1_i1;TRINITY_DN69811_c0_g2_i1;TRINITY_DN70135_c0_g2_i3;TRINITY_DN70433_c0_g1_i3;TRINITY_DN70433_c0_g6_i1;TRINITY_DN70539_c0_g1_i1…	http://amigo.geneontology.org/amigo/term/GO:0003006	BP	89
GO:0048469	cell maturation	9/740	177/21795	0.149315	0.589972	TRINITY_DN67782_c0_g1_i1;TRINITY_DN73484_c2_g1_i1;TRINITY_DN82276_c1_g3_i1;TRINITY_DN82530_c2_g2_i2;TRINITY_DN83527_c3_g5_i1;TRINITY_DN84017_c0_g8_i1;TRINITY_DN84843_c0_g1_i5;TRINITY_DN90446_c3_g2_i3;TRINITY_DN90446_c3_g4_i1	http://amigo.geneontology.org/amigo/term/GO:0048469	BP	9
GO:0009913	epidermal cell differentiation	19/740	431/21795	0.149594	0.589972	TRINITY_DN47904_c0_g1_i1;TRINITY_DN67782_c0_g1_i1;TRINITY_DN69993_c2_g2_i1;TRINITY_DN70539_c0_g1_i1;TRINITY_DN73484_c2_g1_i1;TRINITY_DN78072_c0_g2_i20;TRINITY_DN82276_c1_g3_i1;TRINITY_DN82530_c2_g2_i2;TRINITY_DN83527_c3_g5_i1;TRINITY_DN84017_c0_g8_i1;TRINITY_DN84843_c0_g1_i5;TRINITY_DN85716_c0_g1_i22;TRINITY_DN86643_c1_g4_i3;TRINITY_DN88816_c3_g1_i1;TRINITY_DN90446_c3_g2_i3;TRINITY_DN90446_c3_g4_…	http://amigo.geneontology.org/amigo/term/GO:0009913	BP	19
GO:0071555	cell wall organization	13/740	277/21795	0.150545	0.589972	TRINITY_DN66170_c0_g1_i1;TRINITY_DN68971_c0_g1_i1;TRINITY_DN74830_c0_g1_i3;TRINITY_DN74828_c0_g1_i1;TRINITY_DN77500_c3_g6_i1;TRINITY_DN78565_c0_g1_i1;TRINITY_DN83762_c2_g3_i1;TRINITY_DN84017_c0_g8_i1;TRINITY_DN86907_c3_g4_i3;TRINITY_DN87313_c1_g1_i9;TRINITY_DN88582_c7_g2_i10;TRINITY_DN91863_c1_g3_i1;TRINITY_DN92693_c1_g2_i3	http://amigo.geneontology.org/amigo/term/GO:0071555	BP	13
GO:0051607	defense response to virus	6/740	106/21795	0.151894	0.589972	TRINITY_DN70135_c0_g2_i3;TRINITY_DN78801_c1_g2_i1;TRINITY_DN85827_c2_g1_i4;TRINITY_DN92796_c5_g1_i1;TRINITY_DN93493_c1_g2_i5;TRINITY_DN215683_c0_g1_i1	http://amigo.geneontology.org/amigo/term/GO:0051607	BP	6
GO:0009267	cellular response to starvation	12/740	253/21795	0.1542	0.589972	TRINITY_DN70525_c3_g2_i1;TRINITY_DN71723_c2_g1_i1;TRINITY_DN72450_c1_g5_i2;TRINITY_DN72908_c0_g1_i9;TRINITY_DN77891_c0_g1_i1;TRINITY_DN77891_c1_g1_i5;TRINITY_DN87035_c0_g1_i6;TRINITY_DN87659_c0_g1_i4;TRINITY_DN90204_c2_g3_i5;TRINITY_DN91900_c4_g1_i3;TRINITY_DN92577_c0_g1_i5;TRINITY_DN94882_c0_g4_i1	http://amigo.geneontology.org/amigo/term/GO:0009267	BP	12
GO:0050801	ion homeostasis	18/740	407/21795	0.154272	0.589972	TRINITY_DN68418_c0_g1_i1;TRINITY_DN70640_c1_g1_i2;TRINITY_DN74269_c0_g3_i1;TRINITY_DN74269_c0_g1_i10;TRINITY_DN77751_c2_g5_i2;TRINITY_DN78762_c0_g4_i13;TRINITY_DN81530_c0_g1_i6;TRINITY_DN81807_c4_g1_i3;TRINITY_DN83913_c3_g5_i1;TRINITY_DN85813_c5_g1_i1;TRINITY_DN87035_c0_g1_i6;TRINITY_DN88544_c0_g3_i4;TRINITY_DN88917_c3_g2_i1;TRINITY_DN89234_c2_g5_i2;TRINITY_DN89875_c4_g4_i5;TRINITY_DN90136_c5_g5_…	http://amigo.geneontology.org/amigo/term/GO:0050801	BP	18
GO:0009695	jasmonic acid biosynthetic process	6/740	107/21795	0.156636	0.589972	TRINITY_DN78068_c2_g3_i2;TRINITY_DN81414_c3_g3_i6;TRINITY_DN82128_c1_g2_i2;TRINITY_DN84013_c3_g1_i1;TRINITY_DN88823_c0_g3_i1;TRINITY_DN95473_c1_g4_i1	http://amigo.geneontology.org/amigo/term/GO:0009695	BP	6
GO:0016036	cellular response to phosphate starvation	8/740	155/21795	0.157998	0.589972	TRINITY_DN70525_c3_g2_i1;TRINITY_DN72450_c1_g5_i2;TRINITY_DN77891_c0_g1_i1;TRINITY_DN77891_c1_g1_i5;TRINITY_DN87659_c0_g1_i4;TRINITY_DN90204_c2_g3_i5;TRINITY_DN91900_c4_g1_i3;TRINITY_DN94882_c0_g4_i1	http://amigo.geneontology.org/amigo/term/GO:0016036	BP	8
GO:0031398	positive regulation of protein ubiquitination	2/740	21/21795	0.158488	0.589972	TRINITY_DN80224_c0_g2_i1;TRINITY_DN86288_c3_g4_i1	http://amigo.geneontology.org/amigo/term/GO:0031398	BP	2
GO:0051443	positive regulation of ubiquitin-protein transferase activity	2/740	21/21795	0.158488	0.589972	TRINITY_DN80224_c0_g2_i1;TRINITY_DN86288_c3_g4_i1	http://amigo.geneontology.org/amigo/term/GO:0051443	BP	2
GO:0010204	defense response signaling pathway, resistance gene-independent	2/740	21/21795	0.158488	0.589972	TRINITY_DN77283_c0_g1_i4;TRINITY_DN77283_c0_g5_i1	http://amigo.geneontology.org/amigo/term/GO:0010204	BP	2
GO:0051351	positive regulation of ligase activity	2/740	21/21795	0.158488	0.589972	TRINITY_DN80224_c0_g2_i1;TRINITY_DN86288_c3_g4_i1	http://amigo.geneontology.org/amigo/term/GO:0051351	BP	2
GO:0007041	lysosomal transport	2/740	21/21795	0.158488	0.589972	TRINITY_DN74186_c0_g1_i3;TRINITY_DN82697_c2_g3_i1	http://amigo.geneontology.org/amigo/term/GO:0007041	BP	2
GO:0022404	molting cycle process	1/740	5/21795	0.158634	0.589972	TRINITY_DN94190_c2_g1_i20	http://amigo.geneontology.org/amigo/term/GO:0022404	BP	1
GO:0031101	fin regeneration	1/740	5/21795	0.158634	0.589972	TRINITY_DN94190_c2_g1_i20	http://amigo.geneontology.org/amigo/term/GO:0031101	BP	1
GO:2000029	regulation of proanthocyanidin biosynthetic process	1/740	5/21795	0.158634	0.589972	TRINITY_DN86643_c1_g4_i3	http://amigo.geneontology.org/amigo/term/GO:2000029	BP	1
GO:1900378	positive regulation of secondary metabolite biosynthetic process	1/740	5/21795	0.158634	0.589972	TRINITY_DN70602_c0_g2_i1	http://amigo.geneontology.org/amigo/term/GO:1900378	BP	1
GO:0032350	regulation of hormone metabolic process	1/740	5/21795	0.158634	0.589972	TRINITY_DN68815_c0_g1_i1	http://amigo.geneontology.org/amigo/term/GO:0032350	BP	1
GO:0046083	adenine metabolic process	1/740	5/21795	0.158634	0.589972	TRINITY_DN74311_c0_g3_i13	http://amigo.geneontology.org/amigo/term/GO:0046083	BP	1
GO:0090357	regulation of tryptophan metabolic process	1/740	5/21795	0.158634	0.589972	TRINITY_DN68815_c0_g1_i1	http://amigo.geneontology.org/amigo/term/GO:0090357	BP	1
GO:0045876	positive regulation of sister chromatid cohesion	1/740	5/21795	0.158634	0.589972	TRINITY_DN90636_c0_g1_i7	http://amigo.geneontology.org/amigo/term/GO:0045876	BP	1
GO:0043096	purine nucleobase salvage	1/740	5/21795	0.158634	0.589972	TRINITY_DN74311_c0_g3_i13	http://amigo.geneontology.org/amigo/term/GO:0043096	BP	1
GO:0045739	positive regulation of DNA repair	1/740	5/21795	0.158634	0.589972	TRINITY_DN80224_c0_g2_i1	http://amigo.geneontology.org/amigo/term/GO:0045739	BP	1
GO:0035864	response to potassium ion	1/740	5/21795	0.158634	0.589972	TRINITY_DN78735_c0_g6_i4	http://amigo.geneontology.org/amigo/term/GO:0035864	BP	1
GO:0033298	contractile vacuole organization	1/740	5/21795	0.158634	0.589972	TRINITY_DN75000_c0_g2_i3	http://amigo.geneontology.org/amigo/term/GO:0033298	BP	1
GO:0016127	sterol catabolic process	1/740	5/21795	0.158634	0.589972	TRINITY_DN95812_c1_g1_i9	http://amigo.geneontology.org/amigo/term/GO:0016127	BP	1
GO:0070919	production of siRNA involved in chromatin silencing by small RNA	1/740	5/21795	0.158634	0.589972	TRINITY_DN92454_c3_g1_i1	http://amigo.geneontology.org/amigo/term/GO:0070919	BP	1
GO:0033621	nuclear-transcribed mRNA catabolic process, meiosis-specific transcripts	1/740	5/21795	0.158634	0.589972	TRINITY_DN71239_c1_g1_i7	http://amigo.geneontology.org/amigo/term/GO:0033621	BP	1
GO:0003032	detection of oxygen	1/740	5/21795	0.158634	0.589972	TRINITY_DN75772_c1_g2_i5	http://amigo.geneontology.org/amigo/term/GO:0003032	BP	1
GO:0045962	positive regulation of development, heterochronic	1/740	5/21795	0.158634	0.589972	TRINITY_DN92710_c0_g1_i5	http://amigo.geneontology.org/amigo/term/GO:0045962	BP	1
GO:0051365	cellular response to potassium ion starvation	1/740	5/21795	0.158634	0.589972	TRINITY_DN87035_c0_g1_i6	http://amigo.geneontology.org/amigo/term/GO:0051365	BP	1
GO:0007114	cell budding	1/740	5/21795	0.158634	0.589972	TRINITY_DN75000_c0_g2_i3	http://amigo.geneontology.org/amigo/term/GO:0007114	BP	1
GO:0090480	purine nucleotide-sugar transmembrane transport	1/740	5/21795	0.158634	0.589972	TRINITY_DN82761_c0_g1_i6	http://amigo.geneontology.org/amigo/term/GO:0090480	BP	1
GO:0016093	polyprenol metabolic process	1/740	5/21795	0.158634	0.589972	TRINITY_DN69285_c0_g1_i1	http://amigo.geneontology.org/amigo/term/GO:0016093	BP	1
GO:0016094	polyprenol biosynthetic process	1/740	5/21795	0.158634	0.589972	TRINITY_DN69285_c0_g1_i1	http://amigo.geneontology.org/amigo/term/GO:0016094	BP	1
GO:0055122	response to very low light intensity stimulus	1/740	5/21795	0.158634	0.589972	TRINITY_DN19531_c0_g1_i1	http://amigo.geneontology.org/amigo/term/GO:0055122	BP	1
GO:0000729	DNA double-strand break processing	1/740	5/21795	0.158634	0.589972	TRINITY_DN80224_c0_g2_i1	http://amigo.geneontology.org/amigo/term/GO:0000729	BP	1
GO:0007398	ectoderm development	1/740	5/21795	0.158634	0.589972	TRINITY_DN94190_c2_g1_i20	http://amigo.geneontology.org/amigo/term/GO:0007398	BP	1
GO:0000725	recombinational repair	4/740	62/21795	0.159091	0.590045	TRINITY_DN77207_c2_g1_i3;TRINITY_DN80224_c0_g2_i1;TRINITY_DN90242_c6_g1_i2;TRINITY_DN95884_c0_g1_i1	http://amigo.geneontology.org/amigo/term/GO:0000725	BP	4
GO:0000018	regulation of DNA recombination	4/740	62/21795	0.159091	0.590045	TRINITY_DN76437_c5_g2_i1;TRINITY_DN77139_c0_g2_i1;TRINITY_DN77139_c0_g3_i1;TRINITY_DN88013_c3_g8_i1	http://amigo.geneontology.org/amigo/term/GO:0000018	BP	4
GO:0044003	modification by symbiont of host morphology or physiology	6/740	108/21795	0.161441	0.592222	TRINITY_DN70135_c0_g2_i3;TRINITY_DN77283_c0_g1_i4;TRINITY_DN77283_c0_g5_i1;TRINITY_DN85827_c2_g1_i4;TRINITY_DN92796_c5_g1_i1;TRINITY_DN215683_c0_g1_i1	http://amigo.geneontology.org/amigo/term/GO:0044003	BP	6
GO:0010555	response to mannitol	3/740	41/21795	0.161858	0.592222	TRINITY_DN78940_c0_g4_i2;TRINITY_DN87035_c0_g1_i6;TRINITY_DN91657_c1_g7_i1	http://amigo.geneontology.org/amigo/term/GO:0010555	BP	3
GO:0010162	seed dormancy process	3/740	41/21795	0.161858	0.592222	TRINITY_DN64333_c0_g1_i2;TRINITY_DN79326_c0_g1_i1;TRINITY_DN90371_c1_g1_i1	http://amigo.geneontology.org/amigo/term/GO:0010162	BP	3
GO:0042594	response to starvation	16/740	359/21795	0.16409	0.599449	TRINITY_DN43850_c0_g1_i1;TRINITY_DN70525_c3_g2_i1;TRINITY_DN71723_c2_g1_i1;TRINITY_DN72450_c1_g5_i2;TRINITY_DN72908_c0_g1_i9;TRINITY_DN77891_c0_g1_i1;TRINITY_DN77891_c1_g1_i5;TRINITY_DN81011_c0_g2_i4;TRINITY_DN87035_c0_g1_i6;TRINITY_DN87659_c0_g1_i4;TRINITY_DN89325_c2_g2_i6;TRINITY_DN90204_c2_g3_i5;TRINITY_DN91900_c4_g1_i3;TRINITY_DN92577_c0_g1_i5;TRINITY_DN94882_c0_g4_i1;TRINITY_DN96126_c2_g4_i3	http://amigo.geneontology.org/amigo/term/GO:0042594	BP	16
GO:0009738	abscisic acid-activated signaling pathway	10/740	206/21795	0.164403	0.599831	TRINITY_DN68780_c0_g2_i2;TRINITY_DN69811_c0_g2_i1;TRINITY_DN77570_c2_g2_i2;TRINITY_DN79488_c1_g6_i1;TRINITY_DN80442_c2_g1_i2;TRINITY_DN81627_c2_g1_i12;TRINITY_DN81757_c2_g1_i6;TRINITY_DN82498_c1_g5_i1;TRINITY_DN91785_c1_g13_i1;TRINITY_DN95667_c2_g1_i7	http://amigo.geneontology.org/amigo/term/GO:0009738	BP	10
GO:2000242	negative regulation of reproductive process	6/740	109/21795	0.166309	0.604934	TRINITY_DN74875_c0_g2_i3;TRINITY_DN76957_c0_g4_i4;TRINITY_DN86713_c0_g5_i3;TRINITY_DN91119_c1_g1_i2;TRINITY_DN93466_c1_g3_i1;TRINITY_DN94882_c0_g4_i1	http://amigo.geneontology.org/amigo/term/GO:2000242	BP	6
GO:0019438	aromatic compound biosynthetic process	46/740	1169/21795	0.166858	0.604934	TRINITY_DN43850_c0_g1_i1;TRINITY_DN65523_c0_g1_i1;TRINITY_DN69553_c0_g1_i1;TRINITY_DN70602_c0_g2_i1;TRINITY_DN71317_c1_g1_i3;TRINITY_DN71772_c1_g1_i1;TRINITY_DN72971_c0_g1_i3;TRINITY_DN73594_c1_g1_i2;TRINITY_DN74169_c0_g7_i1;TRINITY_DN74311_c0_g3_i13;TRINITY_DN76793_c1_g1_i2;TRINITY_DN77123_c1_g2_i8;TRINITY_DN77728_c3_g4_i1;TRINITY_DN78503_c0_g1_i2;TRINITY_DN79326_c0_g1_i1;TRINITY_DN79615_c0_g4_i…	http://amigo.geneontology.org/amigo/term/GO:0019438	BP	46
GO:0022414	reproductive process	94/740	2512/21795	0.167783	0.604934	TRINITY_DN19531_c0_g1_i1;TRINITY_DN43850_c0_g1_i1;TRINITY_DN62693_c0_g1_i1;TRINITY_DN63938_c0_g1_i1;TRINITY_DN64333_c0_g1_i2;TRINITY_DN66001_c0_g1_i2;TRINITY_DN67020_c0_g1_i1;TRINITY_DN67047_c0_g1_i1;TRINITY_DN67350_c0_g1_i1;TRINITY_DN68780_c0_g2_i2;TRINITY_DN68775_c1_g1_i1;TRINITY_DN69811_c0_g2_i1;TRINITY_DN70135_c0_g2_i3;TRINITY_DN70433_c0_g1_i3;TRINITY_DN70433_c0_g6_i1;TRINITY_DN70539_c0_g1_i1…	http://amigo.geneontology.org/amigo/term/GO:0022414	BP	94
GO:0022898	regulation of transmembrane transporter activity	3/740	42/21795	0.170204	0.604934	TRINITY_DN74828_c0_g1_i1;TRINITY_DN77570_c2_g2_i2;TRINITY_DN80442_c2_g1_i2	http://amigo.geneontology.org/amigo/term/GO:0022898	BP	3
GO:0032412	regulation of ion transmembrane transporter activity	3/740	42/21795	0.170204	0.604934	TRINITY_DN74828_c0_g1_i1;TRINITY_DN77570_c2_g2_i2;TRINITY_DN80442_c2_g1_i2	http://amigo.geneontology.org/amigo/term/GO:0032412	BP	3
GO:0071363	cellular response to growth factor stimulus	3/740	42/21795	0.170204	0.604934	TRINITY_DN71772_c1_g1_i1;TRINITY_DN75152_c3_g2_i1;TRINITY_DN86288_c3_g4_i1	http://amigo.geneontology.org/amigo/term/GO:0071363	BP	3
GO:0010050	vegetative phase change	3/740	42/21795	0.170204	0.604934	TRINITY_DN81280_c0_g1_i1;TRINITY_DN85827_c2_g1_i4;TRINITY_DN215683_c0_g1_i1	http://amigo.geneontology.org/amigo/term/GO:0010050	BP	3
GO:0070848	response to growth factor	3/740	42/21795	0.170204	0.604934	TRINITY_DN71772_c1_g1_i1;TRINITY_DN75152_c3_g2_i1;TRINITY_DN86288_c3_g4_i1	http://amigo.geneontology.org/amigo/term/GO:0070848	BP	3
GO:0042908	xenobiotic transport	2/740	22/21795	0.170623	0.604934	TRINITY_DN90446_c3_g2_i3;TRINITY_DN90446_c3_g4_i1	http://amigo.geneontology.org/amigo/term/GO:0042908	BP	2
GO:0009960	endosperm development	2/740	22/21795	0.170623	0.604934	TRINITY_DN67020_c0_g1_i1;TRINITY_DN90636_c0_g1_i7	http://amigo.geneontology.org/amigo/term/GO:0009960	BP	2
GO:0010092	specification of animal organ identity	2/740	22/21795	0.170623	0.604934	TRINITY_DN62693_c0_g1_i1;TRINITY_DN92796_c5_g1_i1	http://amigo.geneontology.org/amigo/term/GO:0010092	BP	2
GO:0010093	specification of floral organ identity	2/740	22/21795	0.170623	0.604934	TRINITY_DN62693_c0_g1_i1;TRINITY_DN92796_c5_g1_i1	http://amigo.geneontology.org/amigo/term/GO:0010093	BP	2
GO:0051438	regulation of ubiquitin-protein transferase activity	2/740	22/21795	0.170623	0.604934	TRINITY_DN80224_c0_g2_i1;TRINITY_DN86288_c3_g4_i1	http://amigo.geneontology.org/amigo/term/GO:0051438	BP	2
GO:0010078	maintenance of root meristem identity	2/740	22/21795	0.170623	0.604934	TRINITY_DN82731_c0_g4_i2;TRINITY_DN89409_c1_g3_i3	http://amigo.geneontology.org/amigo/term/GO:0010078	BP	2
GO:0002764	immune response-regulating signaling pathway	2/740	22/21795	0.170623	0.604934	TRINITY_DN80224_c0_g2_i1;TRINITY_DN86288_c3_g4_i1	http://amigo.geneontology.org/amigo/term/GO:0002764	BP	2
GO:0010192	mucilage biosynthetic process	2/740	22/21795	0.170623	0.604934	TRINITY_DN70539_c0_g1_i1;TRINITY_DN76793_c1_g1_i2	http://amigo.geneontology.org/amigo/term/GO:0010192	BP	2
GO:0002757	immune response-activating signal transduction	2/740	22/21795	0.170623	0.604934	TRINITY_DN80224_c0_g2_i1;TRINITY_DN86288_c3_g4_i1	http://amigo.geneontology.org/amigo/term/GO:0002757	BP	2
GO:0006144	purine nucleobase metabolic process	2/740	22/21795	0.170623	0.604934	TRINITY_DN74311_c0_g3_i13;TRINITY_DN84703_c6_g1_i1	http://amigo.geneontology.org/amigo/term/GO:0006144	BP	2
GO:0010586	miRNA metabolic process	2/740	22/21795	0.170623	0.604934	TRINITY_DN81710_c1_g6_i1;TRINITY_DN92946_c1_g3_i6	http://amigo.geneontology.org/amigo/term/GO:0010586	BP	2
GO:0005976	polysaccharide metabolic process	22/740	520/21795	0.171621	0.607728	TRINITY_DN42865_c0_g1_i2;TRINITY_DN69811_c0_g2_i1;TRINITY_DN70263_c0_g1_i2;TRINITY_DN74169_c0_g7_i1;TRINITY_DN74830_c0_g1_i3;TRINITY_DN75350_c1_g3_i2;TRINITY_DN76717_c5_g1_i1;TRINITY_DN78940_c0_g4_i2;TRINITY_DN81193_c0_g2_i4;TRINITY_DN81193_c0_g1_i3;TRINITY_DN82953_c1_g1_i7;TRINITY_DN84017_c0_g8_i1;TRINITY_DN84020_c3_g3_i4;TRINITY_DN87396_c1_g3_i1;TRINITY_DN87396_c1_g2_i6;TRINITY_DN89202_c1_g2_i1…	http://amigo.geneontology.org/amigo/term/GO:0005976	BP	22
GO:0042180	cellular ketone metabolic process	5/740	87/21795	0.17366	0.612693	TRINITY_DN43850_c0_g1_i1;TRINITY_DN68223_c0_g1_i1;TRINITY_DN75727_c2_g2_i4;TRINITY_DN81343_c1_g2_i1;TRINITY_DN82173_c5_g1_i1	http://amigo.geneontology.org/amigo/term/GO:0042180	BP	5
GO:0006073	cellular glucan metabolic process	14/740	311/21795	0.174528	0.614252	TRINITY_DN42865_c0_g1_i2;TRINITY_DN69811_c0_g2_i1;TRINITY_DN70263_c0_g1_i2;TRINITY_DN74169_c0_g7_i1;TRINITY_DN75350_c1_g3_i2;TRINITY_DN76717_c5_g1_i1;TRINITY_DN78940_c0_g4_i2;TRINITY_DN82953_c1_g1_i7;TRINITY_DN84017_c0_g8_i1;TRINITY_DN84020_c3_g3_i4;TRINITY_DN87396_c1_g3_i1;TRINITY_DN87396_c1_g2_i6;TRINITY_DN91657_c1_g7_i1;TRINITY_DN94133_c0_g1_i8	http://amigo.geneontology.org/amigo/term/GO:0006073	BP	14
GO:0044042	glucan metabolic process	14/740	311/21795	0.174528	0.614252	TRINITY_DN42865_c0_g1_i2;TRINITY_DN69811_c0_g2_i1;TRINITY_DN70263_c0_g1_i2;TRINITY_DN74169_c0_g7_i1;TRINITY_DN75350_c1_g3_i2;TRINITY_DN76717_c5_g1_i1;TRINITY_DN78940_c0_g4_i2;TRINITY_DN82953_c1_g1_i7;TRINITY_DN84017_c0_g8_i1;TRINITY_DN84020_c3_g3_i4;TRINITY_DN87396_c1_g3_i1;TRINITY_DN87396_c1_g2_i6;TRINITY_DN91657_c1_g7_i1;TRINITY_DN94133_c0_g1_i8	http://amigo.geneontology.org/amigo/term/GO:0044042	BP	14
GO:0060429	epithelium development	22/740	522/21795	0.176053	0.618728	TRINITY_DN43850_c0_g1_i1;TRINITY_DN47904_c0_g1_i1;TRINITY_DN67782_c0_g1_i1;TRINITY_DN69073_c2_g1_i1;TRINITY_DN69993_c2_g2_i1;TRINITY_DN70539_c0_g1_i1;TRINITY_DN73484_c2_g1_i1;TRINITY_DN75152_c3_g2_i1;TRINITY_DN78072_c0_g2_i20;TRINITY_DN82276_c1_g3_i1;TRINITY_DN82530_c2_g2_i2;TRINITY_DN83527_c3_g5_i1;TRINITY_DN84017_c0_g8_i1;TRINITY_DN84843_c0_g1_i5;TRINITY_DN85716_c0_g1_i22;TRINITY_DN86643_c1_g4_…	http://amigo.geneontology.org/amigo/term/GO:0060429	BP	22
GO:0035821	modification of morphology or physiology of other organism	6/740	111/21795	0.176228	0.618728	TRINITY_DN70135_c0_g2_i3;TRINITY_DN77283_c0_g1_i4;TRINITY_DN77283_c0_g5_i1;TRINITY_DN85827_c2_g1_i4;TRINITY_DN92796_c5_g1_i1;TRINITY_DN215683_c0_g1_i1	http://amigo.geneontology.org/amigo/term/GO:0035821	BP	6
GO:0080022	primary root development	3/740	43/21795	0.178671	0.624267	TRINITY_DN82731_c0_g4_i2;TRINITY_DN89409_c1_g3_i3;TRINITY_DN89850_c5_g1_i3	http://amigo.geneontology.org/amigo/term/GO:0080022	BP	3
GO:0006346	methylation-dependent chromatin silencing	2/740	23/21795	0.182904	0.625867	TRINITY_DN71200_c0_g1_i3;TRINITY_DN88658_c1_g3_i5	http://amigo.geneontology.org/amigo/term/GO:0006346	BP	2
GO:0009251	glucan catabolic process	5/740	89/21795	0.185158	0.625867	TRINITY_DN42865_c0_g1_i2;TRINITY_DN69811_c0_g2_i1;TRINITY_DN76717_c5_g1_i1;TRINITY_DN82953_c1_g1_i7;TRINITY_DN94133_c0_g1_i8	http://amigo.geneontology.org/amigo/term/GO:0009251	BP	5
GO:0042435	indole-containing compound biosynthetic process	4/740	66/21795	0.185842	0.625867	TRINITY_DN70602_c0_g2_i1;TRINITY_DN73594_c1_g1_i2;TRINITY_DN82731_c0_g4_i2;TRINITY_DN89409_c1_g3_i3	http://amigo.geneontology.org/amigo/term/GO:0042435	BP	4
GO:0032889	regulation of vacuole fusion, non-autophagic	1/740	6/21795	0.187207	0.625867	TRINITY_DN88654_c0_g2_i8	http://amigo.geneontology.org/amigo/term/GO:0032889	BP	1
GO:0090352	regulation of nitrate assimilation	1/740	6/21795	0.187207	0.625867	TRINITY_DN94882_c0_g4_i1	http://amigo.geneontology.org/amigo/term/GO:0090352	BP	1
GO:0035019	somatic stem cell population maintenance	1/740	6/21795	0.187207	0.625867	TRINITY_DN92946_c1_g3_i6	http://amigo.geneontology.org/amigo/term/GO:0035019	BP	1
GO:0002540	leukotriene production involved in inflammatory response	1/740	6/21795	0.187207	0.625867	TRINITY_DN91427_c7_g2_i3	http://amigo.geneontology.org/amigo/term/GO:0002540	BP	1
GO:0009768	photosynthesis, light harvesting in photosystem I	1/740	6/21795	0.187207	0.625867	TRINITY_DN58158_c0_g1_i1	http://amigo.geneontology.org/amigo/term/GO:0009768	BP	1
GO:0001561	fatty acid alpha-oxidation	1/740	6/21795	0.187207	0.625867	TRINITY_DN79971_c0_g2_i4	http://amigo.geneontology.org/amigo/term/GO:0001561	BP	1
GO:0010247	detection of phosphate ion	1/740	6/21795	0.187207	0.625867	TRINITY_DN94882_c0_g4_i1	http://amigo.geneontology.org/amigo/term/GO:0010247	BP	1
GO:0048268	clathrin coat assembly	1/740	6/21795	0.187207	0.625867	TRINITY_DN73631_c1_g2_i1	http://amigo.geneontology.org/amigo/term/GO:0048268	BP	1
GO:0010076	maintenance of floral meristem identity	1/740	6/21795	0.187207	0.625867	TRINITY_DN85755_c0_g3_i1	http://amigo.geneontology.org/amigo/term/GO:0010076	BP	1
GO:0010529	negative regulation of transposition	1/740	6/21795	0.187207	0.625867	TRINITY_DN66001_c0_g1_i2	http://amigo.geneontology.org/amigo/term/GO:0010529	BP	1
GO:0042461	photoreceptor cell development	1/740	6/21795	0.187207	0.625867	TRINITY_DN80224_c0_g2_i1	http://amigo.geneontology.org/amigo/term/GO:0042461	BP	1
GO:0006706	steroid catabolic process	1/740	6/21795	0.187207	0.625867	TRINITY_DN95812_c1_g1_i9	http://amigo.geneontology.org/amigo/term/GO:0006706	BP	1
GO:0007063	regulation of sister chromatid cohesion	1/740	6/21795	0.187207	0.625867	TRINITY_DN90636_c0_g1_i7	http://amigo.geneontology.org/amigo/term/GO:0007063	BP	1
GO:0033169	histone H3-K9 demethylation	1/740	6/21795	0.187207	0.625867	TRINITY_DN75500_c1_g1_i1	http://amigo.geneontology.org/amigo/term/GO:0033169	BP	1
GO:0030639	polyketide biosynthetic process	1/740	6/21795	0.187207	0.625867	TRINITY_DN77590_c0_g3_i1	http://amigo.geneontology.org/amigo/term/GO:0030639	BP	1
GO:0043266	regulation of potassium ion transport	1/740	6/21795	0.187207	0.625867	TRINITY_DN87035_c0_g1_i6	http://amigo.geneontology.org/amigo/term/GO:0043266	BP	1
GO:0045604	regulation of epidermal cell differentiation	1/740	6/21795	0.187207	0.625867	TRINITY_DN94190_c2_g1_i20	http://amigo.geneontology.org/amigo/term/GO:0045604	BP	1
GO:0048579	negative regulation of long-day photoperiodism, flowering	1/740	6/21795	0.187207	0.625867	TRINITY_DN75500_c1_g1_i1	http://amigo.geneontology.org/amigo/term/GO:0048579	BP	1
GO:0009645	response to low light intensity stimulus	3/740	44/21795	0.18725	0.625867	TRINITY_DN69285_c0_g1_i1;TRINITY_DN72971_c0_g1_i3;TRINITY_DN82036_c3_g1_i3	http://amigo.geneontology.org/amigo/term/GO:0009645	BP	3
GO:0009094	L-phenylalanine biosynthetic process	3/740	44/21795	0.18725	0.625867	TRINITY_DN72971_c0_g1_i3;TRINITY_DN82036_c3_g1_i3;TRINITY_DN91527_c3_g4_i1	http://amigo.geneontology.org/amigo/term/GO:0009094	BP	3
GO:0071215	cellular response to abscisic acid stimulus	11/740	238/21795	0.18773	0.625867	TRINITY_DN66576_c0_g1_i2;TRINITY_DN68780_c0_g2_i2;TRINITY_DN69811_c0_g2_i1;TRINITY_DN77570_c2_g2_i2;TRINITY_DN79488_c1_g6_i1;TRINITY_DN80442_c2_g1_i2;TRINITY_DN81627_c2_g1_i12;TRINITY_DN81757_c2_g1_i6;TRINITY_DN82498_c1_g5_i1;TRINITY_DN91785_c1_g13_i1;TRINITY_DN95667_c2_g1_i7	http://amigo.geneontology.org/amigo/term/GO:0071215	BP	11
GO:0048523	negative regulation of cellular process	42/740	1073/21795	0.188799	0.625867	TRINITY_DN65780_c0_g1_i2;TRINITY_DN66001_c0_g1_i2;TRINITY_DN67047_c0_g1_i1;TRINITY_DN68780_c0_g2_i2;TRINITY_DN70682_c0_g1_i1;TRINITY_DN71200_c0_g1_i3;TRINITY_DN71239_c1_g1_i7;TRINITY_DN71392_c0_g1_i7;TRINITY_DN71557_c0_g1_i11;TRINITY_DN71772_c1_g1_i1;TRINITY_DN72765_c0_g1_i1;TRINITY_DN73631_c1_g2_i1;TRINITY_DN74039_c0_g2_i1;TRINITY_DN75808_c2_g1_i1;TRINITY_DN75913_c2_g1_i8;TRINITY_DN76437_c5_g2_i…	http://amigo.geneontology.org/amigo/term/GO:0048523	BP	42
GO:0008643	carbohydrate transport	9/740	188/21795	0.19064	0.630225	TRINITY_DN68107_c0_g1_i1;TRINITY_DN69901_c0_g2_i2;TRINITY_DN72714_c0_g2_i1;TRINITY_DN80839_c0_g1_i9;TRINITY_DN82761_c0_g1_i6;TRINITY_DN90235_c0_g2_i12;TRINITY_DN91375_c1_g1_i2;TRINITY_DN91981_c0_g3_i2;TRINITY_DN92375_c1_g2_i4	http://amigo.geneontology.org/amigo/term/GO:0008643	BP	9
GO:0006820	anion transport	23/740	556/21795	0.192339	0.635113	TRINITY_DN70525_c3_g2_i1;TRINITY_DN70887_c0_g1_i2;TRINITY_DN72170_c3_g8_i1;TRINITY_DN72170_c3_g9_i1;TRINITY_DN73821_c5_g2_i1;TRINITY_DN74250_c0_g1_i1;TRINITY_DN74807_c2_g1_i3;TRINITY_DN76473_c8_g1_i2;TRINITY_DN79540_c0_g3_i4;TRINITY_DN80116_c1_g2_i8;TRINITY_DN81637_c4_g2_i1;TRINITY_DN82761_c0_g1_i6;TRINITY_DN82945_c0_g2_i4;TRINITY_DN84932_c0_g1_i4;TRINITY_DN88544_c0_g3_i4;TRINITY_DN88582_c7_g2_i1…	http://amigo.geneontology.org/amigo/term/GO:0006820	BP	23
GO:0018105	peptidyl-serine phosphorylation	2/740	24/21795	0.195309	0.640525	TRINITY_DN79589_c0_g1_i2;TRINITY_DN80892_c0_g1_i6	http://amigo.geneontology.org/amigo/term/GO:0018105	BP	2
GO:0007179	transforming growth factor beta receptor signaling pathway	2/740	24/21795	0.195309	0.640525	TRINITY_DN71772_c1_g1_i1;TRINITY_DN86288_c3_g4_i1	http://amigo.geneontology.org/amigo/term/GO:0007179	BP	2
GO:0015786	UDP-glucose transport	2/740	24/21795	0.195309	0.640525	TRINITY_DN82761_c0_g1_i6;TRINITY_DN84932_c0_g1_i4	http://amigo.geneontology.org/amigo/term/GO:0015786	BP	2
GO:0010036	response to boron-containing substance	2/740	24/21795	0.195309	0.640525	TRINITY_DN91375_c1_g1_i2;TRINITY_DN93749_c0_g1_i3	http://amigo.geneontology.org/amigo/term/GO:0010036	BP	2
GO:0030198	extracellular matrix organization	2/740	24/21795	0.195309	0.640525	TRINITY_DN75152_c3_g2_i1;TRINITY_DN92693_c1_g2_i3	http://amigo.geneontology.org/amigo/term/GO:0030198	BP	2
GO:0022611	dormancy process	3/740	45/21795	0.195932	0.641447	TRINITY_DN64333_c0_g1_i2;TRINITY_DN79326_c0_g1_i1;TRINITY_DN90371_c1_g1_i1	http://amigo.geneontology.org/amigo/term/GO:0022611	BP	3
GO:0048569	post-embryonic animal organ development	28/740	693/21795	0.196035	0.641447	TRINITY_DN62693_c0_g1_i1;TRINITY_DN67047_c0_g1_i1;TRINITY_DN67350_c0_g1_i1;TRINITY_DN69811_c0_g2_i1;TRINITY_DN71355_c0_g1_i1;TRINITY_DN72627_c2_g1_i3;TRINITY_DN72765_c0_g1_i1;TRINITY_DN73792_c0_g1_i3;TRINITY_DN73821_c5_g2_i1;TRINITY_DN75510_c0_g5_i4;TRINITY_DN76233_c0_g1_i1;TRINITY_DN78637_c1_g1_i3;TRINITY_DN81281_c4_g1_i1;TRINITY_DN81443_c1_g2_i6;TRINITY_DN81698_c0_g3_i1;TRINITY_DN83499_c1_g7_i1…	http://amigo.geneontology.org/amigo/term/GO:0048569	BP	28
GO:0052018	modulation by symbiont of RNA levels in host	4/740	68/21795	0.19973	0.650521	TRINITY_DN70135_c0_g2_i3;TRINITY_DN85827_c2_g1_i4;TRINITY_DN92796_c5_g1_i1;TRINITY_DN215683_c0_g1_i1	http://amigo.geneontology.org/amigo/term/GO:0052018	BP	4
GO:0009834	plant-type secondary cell wall biogenesis	4/740	68/21795	0.19973	0.650521	TRINITY_DN68815_c0_g1_i1;TRINITY_DN74169_c0_g7_i1;TRINITY_DN83499_c1_g7_i1;TRINITY_DN87396_c1_g2_i6	http://amigo.geneontology.org/amigo/term/GO:0009834	BP	4
GO:0009616	virus induced gene silencing	4/740	68/21795	0.19973	0.650521	TRINITY_DN70135_c0_g2_i3;TRINITY_DN85827_c2_g1_i4;TRINITY_DN92796_c5_g1_i1;TRINITY_DN215683_c0_g1_i1	http://amigo.geneontology.org/amigo/term/GO:0009616	BP	4
GO:0009411	response to UV	11/740	242/21795	0.201859	0.650521	TRINITY_DN65523_c0_g1_i1;TRINITY_DN75913_c2_g1_i8;TRINITY_DN77590_c0_g5_i1;TRINITY_DN77590_c0_g8_i1;TRINITY_DN82735_c0_g4_i1;TRINITY_DN89151_c0_g1_i9;TRINITY_DN89554_c1_g1_i1;TRINITY_DN90326_c0_g1_i5;TRINITY_DN94747_c1_g1_i2;TRINITY_DN94747_c1_g4_i2;TRINITY_DN96704_c2_g1_i1	http://amigo.geneontology.org/amigo/term/GO:0009411	BP	11
GO:0015850	organic hydroxy compound transport	6/740	116/21795	0.202023	0.650521	TRINITY_DN67443_c0_g1_i2;TRINITY_DN71157_c0_g3_i1;TRINITY_DN74963_c1_g2_i1;TRINITY_DN76628_c0_g1_i1;TRINITY_DN86907_c3_g4_i3;TRINITY_DN91375_c1_g1_i2	http://amigo.geneontology.org/amigo/term/GO:0015850	BP	6
GO:0050778	positive regulation of immune response	5/740	92/21795	0.202902	0.650521	TRINITY_DN77283_c0_g1_i4;TRINITY_DN77283_c0_g5_i1;TRINITY_DN80224_c0_g2_i1;TRINITY_DN86288_c3_g4_i1;TRINITY_DN94190_c2_g1_i20	http://amigo.geneontology.org/amigo/term/GO:0050778	BP	5
GO:0055065	metal ion homeostasis	13/740	295/21795	0.205359	0.650521	TRINITY_DN68418_c0_g1_i1;TRINITY_DN70640_c1_g1_i2;TRINITY_DN74269_c0_g3_i1;TRINITY_DN74269_c0_g1_i10;TRINITY_DN78762_c0_g4_i13;TRINITY_DN81530_c0_g1_i6;TRINITY_DN81807_c4_g1_i3;TRINITY_DN85813_c5_g1_i1;TRINITY_DN87035_c0_g1_i6;TRINITY_DN88917_c3_g2_i1;TRINITY_DN89234_c2_g5_i2;TRINITY_DN90136_c5_g5_i2;TRINITY_DN90668_c1_g3_i1	http://amigo.geneontology.org/amigo/term/GO:0055065	BP	13
GO:0016119	carotene metabolic process	2/740	25/21795	0.207814	0.650521	TRINITY_DN73481_c7_g1_i1;TRINITY_DN73693_c0_g3_i2	http://amigo.geneontology.org/amigo/term/GO:0016119	BP	2
GO:0090481	pyrimidine nucleotide-sugar transmembrane transport	2/740	25/21795	0.207814	0.650521	TRINITY_DN82761_c0_g1_i6;TRINITY_DN84932_c0_g1_i4	http://amigo.geneontology.org/amigo/term/GO:0090481	BP	2
GO:0015781	pyrimidine nucleotide-sugar transport	2/740	25/21795	0.207814	0.650521	TRINITY_DN82761_c0_g1_i6;TRINITY_DN84932_c0_g1_i4	http://amigo.geneontology.org/amigo/term/GO:0015781	BP	2
GO:0006528	asparagine metabolic process	2/740	25/21795	0.207814	0.650521	TRINITY_DN71723_c2_g1_i1;TRINITY_DN92577_c0_g1_i5	http://amigo.geneontology.org/amigo/term/GO:0006528	BP	2
GO:0007568	aging	15/740	349/21795	0.209657	0.650521	TRINITY_DN68418_c0_g1_i1;TRINITY_DN78300_c2_g8_i1;TRINITY_DN79255_c2_g3_i2;TRINITY_DN79998_c5_g2_i1;TRINITY_DN83068_c1_g1_i1;TRINITY_DN84959_c0_g2_i5;TRINITY_DN85192_c0_g2_i3;TRINITY_DN87282_c0_g3_i2;TRINITY_DN88648_c1_g2_i3;TRINITY_DN88654_c0_g2_i8;TRINITY_DN89843_c3_g1_i1;TRINITY_DN89843_c3_g2_i3;TRINITY_DN90160_c3_g2_i7;TRINITY_DN90160_c3_g1_i13;TRINITY_DN96995_c4_g4_i1	http://amigo.geneontology.org/amigo/term/GO:0007568	BP	15
GO:0009095	aromatic amino acid family biosynthetic process, prephenate pathway	3/740	47/21795	0.213578	0.650521	TRINITY_DN72971_c0_g1_i3;TRINITY_DN82036_c3_g1_i3;TRINITY_DN91527_c3_g4_i1	http://amigo.geneontology.org/amigo/term/GO:0009095	BP	3
GO:0016050	vesicle organization	3/740	47/21795	0.213578	0.650521	TRINITY_DN73631_c1_g2_i1;TRINITY_DN74186_c0_g1_i3;TRINITY_DN75000_c0_g2_i3	http://amigo.geneontology.org/amigo/term/GO:0016050	BP	3
GO:0010152	pollen maturation	3/740	47/21795	0.213578	0.650521	TRINITY_DN89850_c5_g1_i3;TRINITY_DN91981_c0_g3_i2;TRINITY_DN96833_c1_g1_i8	http://amigo.geneontology.org/amigo/term/GO:0010152	BP	3
GO:0006338	chromatin remodeling	4/740	70/21795	0.213917	0.650521	TRINITY_DN80567_c0_g6_i1;TRINITY_DN80593_c0_g6_i1;TRINITY_DN86713_c0_g5_i3;TRINITY_DN95457_c5_g4_i1	http://amigo.geneontology.org/amigo/term/GO:0006338	BP	4
GO:0032355	response to estradiol	1/740	7/21795	0.214812	0.650521	TRINITY_DN88654_c0_g2_i8	http://amigo.geneontology.org/amigo/term/GO:0032355	BP	1
GO:0017015	regulation of transforming growth factor beta receptor signaling pathway	1/740	7/21795	0.214812	0.650521	TRINITY_DN86288_c3_g4_i1	http://amigo.geneontology.org/amigo/term/GO:0017015	BP	1
GO:0010353	response to trehalose	1/740	7/21795	0.214812	0.650521	TRINITY_DN69811_c0_g2_i1	http://amigo.geneontology.org/amigo/term/GO:0010353	BP	1
GO:0090288	negative regulation of cellular response to growth factor stimulus	1/740	7/21795	0.214812	0.650521	TRINITY_DN86288_c3_g4_i1	http://amigo.geneontology.org/amigo/term/GO:0090288	BP	1
GO:0031538	negative regulation of anthocyanin metabolic process	1/740	7/21795	0.214812	0.650521	TRINITY_DN53892_c1_g1_i1	http://amigo.geneontology.org/amigo/term/GO:0031538	BP	1
GO:0080175	phragmoplast microtubule organization	1/740	7/21795	0.214812	0.650521	TRINITY_DN79243_c1_g4_i2	http://amigo.geneontology.org/amigo/term/GO:0080175	BP	1
GO:0016577	histone demethylation	1/740	7/21795	0.214812	0.650521	TRINITY_DN75500_c1_g1_i1	http://amigo.geneontology.org/amigo/term/GO:0016577	BP	1
GO:0010113	negative regulation of systemic acquired resistance	1/740	7/21795	0.214812	0.650521	TRINITY_DN94882_c0_g4_i1	http://amigo.geneontology.org/amigo/term/GO:0010113	BP	1
GO:0015793	glycerol transport	1/740	7/21795	0.214812	0.650521	TRINITY_DN91375_c1_g1_i2	http://amigo.geneontology.org/amigo/term/GO:0015793	BP	1
GO:0006120	mitochondrial electron transport, NADH to ubiquinone	1/740	7/21795	0.214812	0.650521	TRINITY_DN79715_c0_g6_i1	http://amigo.geneontology.org/amigo/term/GO:0006120	BP	1
GO:0080154	regulation of fertilization	1/740	7/21795	0.214812	0.650521	TRINITY_DN76233_c0_g1_i1	http://amigo.geneontology.org/amigo/term/GO:0080154	BP	1
GO:0080155	regulation of double fertilization forming a zygote and endosperm	1/740	7/21795	0.214812	0.650521	TRINITY_DN76233_c0_g1_i1	http://amigo.geneontology.org/amigo/term/GO:0080155	BP	1
GO:0042147	retrograde transport, endosome to Golgi	1/740	7/21795	0.214812	0.650521	TRINITY_DN86583_c0_g3_i1	http://amigo.geneontology.org/amigo/term/GO:0042147	BP	1
GO:0034484	raffinose catabolic process	1/740	7/21795	0.214812	0.650521	TRINITY_DN86638_c3_g6_i2	http://amigo.geneontology.org/amigo/term/GO:0034484	BP	1
GO:0006482	protein demethylation	1/740	7/21795	0.214812	0.650521	TRINITY_DN75500_c1_g1_i1	http://amigo.geneontology.org/amigo/term/GO:0006482	BP	1
GO:2001022	positive regulation of response to DNA damage stimulus	1/740	7/21795	0.214812	0.650521	TRINITY_DN80224_c0_g2_i1	http://amigo.geneontology.org/amigo/term/GO:2001022	BP	1
GO:0007220	Notch receptor processing	1/740	7/21795	0.214812	0.650521	TRINITY_DN86288_c3_g4_i1	http://amigo.geneontology.org/amigo/term/GO:0007220	BP	1
GO:0016233	telomere capping	1/740	7/21795	0.214812	0.650521	TRINITY_DN79180_c4_g2_i1	http://amigo.geneontology.org/amigo/term/GO:0016233	BP	1
GO:0000738	DNA catabolic process, exonucleolytic	1/740	7/21795	0.214812	0.650521	TRINITY_DN80224_c0_g2_i1	http://amigo.geneontology.org/amigo/term/GO:0000738	BP	1
GO:0010501	RNA secondary structure unwinding	1/740	7/21795	0.214812	0.650521	TRINITY_DN85273_c2_g8_i3	http://amigo.geneontology.org/amigo/term/GO:0010501	BP	1
GO:0010896	regulation of triglyceride catabolic process	1/740	7/21795	0.214812	0.650521	TRINITY_DN69811_c0_g2_i1	http://amigo.geneontology.org/amigo/term/GO:0010896	BP	1
GO:0009157	deoxyribonucleoside monophosphate biosynthetic process	1/740	7/21795	0.214812	0.650521	TRINITY_DN90329_c1_g1_i10	http://amigo.geneontology.org/amigo/term/GO:0009157	BP	1
GO:0007249	I-kappaB kinase/NF-kappaB signaling	1/740	7/21795	0.214812	0.650521	TRINITY_DN86288_c3_g4_i1	http://amigo.geneontology.org/amigo/term/GO:0007249	BP	1
GO:0061418	regulation of transcription from RNA polymerase II promoter in response to hypoxia	1/740	7/21795	0.214812	0.650521	TRINITY_DN86288_c3_g4_i1	http://amigo.geneontology.org/amigo/term/GO:0061418	BP	1
GO:0090207	regulation of triglyceride metabolic process	1/740	7/21795	0.214812	0.650521	TRINITY_DN69811_c0_g2_i1	http://amigo.geneontology.org/amigo/term/GO:0090207	BP	1
GO:0032480	negative regulation of type I interferon production	1/740	7/21795	0.214812	0.650521	TRINITY_DN86288_c3_g4_i1	http://amigo.geneontology.org/amigo/term/GO:0032480	BP	1
GO:0070076	histone lysine demethylation	1/740	7/21795	0.214812	0.650521	TRINITY_DN75500_c1_g1_i1	http://amigo.geneontology.org/amigo/term/GO:0070076	BP	1
GO:0000025	maltose catabolic process	1/740	7/21795	0.214812	0.650521	TRINITY_DN76717_c5_g1_i1	http://amigo.geneontology.org/amigo/term/GO:0000025	BP	1
GO:0001818	negative regulation of cytokine production	1/740	7/21795	0.214812	0.650521	TRINITY_DN86288_c3_g4_i1	http://amigo.geneontology.org/amigo/term/GO:0001818	BP	1
GO:0030512	negative regulation of transforming growth factor beta receptor signaling pathway	1/740	7/21795	0.214812	0.650521	TRINITY_DN86288_c3_g4_i1	http://amigo.geneontology.org/amigo/term/GO:0030512	BP	1
GO:0009805	coumarin biosynthetic process	1/740	7/21795	0.214812	0.650521	TRINITY_DN92439_c6_g2_i2	http://amigo.geneontology.org/amigo/term/GO:0009805	BP	1
GO:0009804	coumarin metabolic process	1/740	7/21795	0.214812	0.650521	TRINITY_DN92439_c6_g2_i2	http://amigo.geneontology.org/amigo/term/GO:0009804	BP	1
GO:0009637	response to blue light	7/740	144/21795	0.218476	0.657236	TRINITY_DN58158_c0_g1_i1;TRINITY_DN68780_c0_g2_i2;TRINITY_DN71317_c1_g1_i3;TRINITY_DN72971_c0_g1_i3;TRINITY_DN81011_c0_g2_i4;TRINITY_DN81851_c0_g2_i8;TRINITY_DN82036_c3_g1_i3	http://amigo.geneontology.org/amigo/term/GO:0009637	BP	7
GO:0071669	plant-type cell wall organization or biogenesis	13/740	299/21795	0.218623	0.657236	TRINITY_DN68815_c0_g1_i1;TRINITY_DN68971_c0_g1_i1;TRINITY_DN70951_c0_g1_i9;TRINITY_DN74169_c0_g7_i1;TRINITY_DN74830_c0_g1_i3;TRINITY_DN77500_c3_g6_i1;TRINITY_DN83499_c1_g7_i1;TRINITY_DN83762_c2_g3_i1;TRINITY_DN84017_c0_g8_i1;TRINITY_DN87396_c1_g3_i1;TRINITY_DN87396_c1_g2_i6;TRINITY_DN91863_c1_g3_i1;TRINITY_DN92693_c1_g2_i3	http://amigo.geneontology.org/amigo/term/GO:0071669	BP	13
GO:0010244	response to low fluence blue light stimulus by blue low-fluence system	2/740	26/21795	0.220399	0.65751	TRINITY_DN72971_c0_g1_i3;TRINITY_DN82036_c3_g1_i3	http://amigo.geneontology.org/amigo/term/GO:0010244	BP	2
GO:0071559	response to transforming growth factor beta	2/740	26/21795	0.220399	0.65751	TRINITY_DN71772_c1_g1_i1;TRINITY_DN86288_c3_g4_i1	http://amigo.geneontology.org/amigo/term/GO:0071559	BP	2
GO:0071560	cellular response to transforming growth factor beta stimulus	2/740	26/21795	0.220399	0.65751	TRINITY_DN71772_c1_g1_i1;TRINITY_DN86288_c3_g4_i1	http://amigo.geneontology.org/amigo/term/GO:0071560	BP	2
GO:0043062	extracellular structure organization	2/740	26/21795	0.220399	0.65751	TRINITY_DN75152_c3_g2_i1;TRINITY_DN92693_c1_g2_i3	http://amigo.geneontology.org/amigo/term/GO:0043062	BP	2
GO:0018209	peptidyl-serine modification	2/740	26/21795	0.220399	0.65751	TRINITY_DN79589_c0_g1_i2;TRINITY_DN80892_c0_g1_i6	http://amigo.geneontology.org/amigo/term/GO:0018209	BP	2
GO:0051093	negative regulation of developmental process	14/740	326/21795	0.220537	0.65751	TRINITY_DN71392_c0_g1_i7;TRINITY_DN74875_c0_g2_i3;TRINITY_DN75500_c1_g1_i1;TRINITY_DN76957_c0_g4_i4;TRINITY_DN81280_c0_g1_i1;TRINITY_DN82731_c0_g4_i2;TRINITY_DN85755_c0_g3_i1;TRINITY_DN86713_c0_g5_i3;TRINITY_DN87015_c1_g5_i3;TRINITY_DN89409_c1_g3_i3;TRINITY_DN91119_c1_g1_i2;TRINITY_DN92946_c1_g3_i6;TRINITY_DN93466_c1_g3_i1;TRINITY_DN94882_c0_g4_i1	http://amigo.geneontology.org/amigo/term/GO:0051093	BP	14
GO:1901663	quinone biosynthetic process	4/740	71/21795	0.221113	0.658546	TRINITY_DN68223_c0_g1_i1;TRINITY_DN75727_c2_g2_i4;TRINITY_DN81343_c1_g2_i1;TRINITY_DN82173_c5_g1_i1	http://amigo.geneontology.org/amigo/term/GO:1901663	BP	4
GO:0006558	L-phenylalanine metabolic process	3/740	48/21795	0.222525	0.662068	TRINITY_DN72971_c0_g1_i3;TRINITY_DN82036_c3_g1_i3;TRINITY_DN91527_c3_g4_i1	http://amigo.geneontology.org/amigo/term/GO:0006558	BP	3
GO:0006342	chromatin silencing	5/740	96/21795	0.227391	0.671699	TRINITY_DN71200_c0_g1_i3;TRINITY_DN78441_c2_g1_i5;TRINITY_DN80593_c0_g6_i1;TRINITY_DN88658_c1_g3_i5;TRINITY_DN92454_c3_g1_i1	http://amigo.geneontology.org/amigo/term/GO:0006342	BP	5
GO:0048444	floral organ morphogenesis	5/740	96/21795	0.227391	0.671699	TRINITY_DN62693_c0_g1_i1;TRINITY_DN67350_c0_g1_i1;TRINITY_DN71355_c0_g1_i1;TRINITY_DN90042_c0_g4_i2;TRINITY_DN92796_c5_g1_i1	http://amigo.geneontology.org/amigo/term/GO:0048444	BP	5
GO:0002684	positive regulation of immune system process	5/740	96/21795	0.227391	0.671699	TRINITY_DN77283_c0_g1_i4;TRINITY_DN77283_c0_g5_i1;TRINITY_DN80224_c0_g2_i1;TRINITY_DN86288_c3_g4_i1;TRINITY_DN94190_c2_g1_i20	http://amigo.geneontology.org/amigo/term/GO:0002684	BP	5
GO:0040034	regulation of development, heterochronic	3/740	49/21795	0.231544	0.677928	TRINITY_DN68780_c0_g2_i2;TRINITY_DN81280_c0_g1_i1;TRINITY_DN92710_c0_g1_i5	http://amigo.geneontology.org/amigo/term/GO:0040034	BP	3
GO:0045926	negative regulation of growth	3/740	49/21795	0.231544	0.677928	TRINITY_DN68780_c0_g2_i2;TRINITY_DN86583_c0_g3_i1;TRINITY_DN88654_c0_g2_i8	http://amigo.geneontology.org/amigo/term/GO:0045926	BP	3
GO:0061025	membrane fusion	3/740	49/21795	0.231544	0.677928	TRINITY_DN69022_c0_g1_i1;TRINITY_DN74186_c0_g1_i3;TRINITY_DN75000_c0_g2_i3	http://amigo.geneontology.org/amigo/term/GO:0061025	BP	3
GO:0010053	root epidermal cell differentiation	9/740	198/21795	0.231994	0.677928	TRINITY_DN67782_c0_g1_i1;TRINITY_DN73484_c2_g1_i1;TRINITY_DN82276_c1_g3_i1;TRINITY_DN82530_c2_g2_i2;TRINITY_DN83527_c3_g5_i1;TRINITY_DN84017_c0_g8_i1;TRINITY_DN84843_c0_g1_i5;TRINITY_DN90446_c3_g2_i3;TRINITY_DN90446_c3_g4_i1	http://amigo.geneontology.org/amigo/term/GO:0010053	BP	9
GO:0019432	triglyceride biosynthetic process	2/740	27/21795	0.233044	0.677928	TRINITY_DN68864_c0_g1_i6;TRINITY_DN91267_c0_g4_i1	http://amigo.geneontology.org/amigo/term/GO:0019432	BP	2
GO:0048859	formation of anatomical boundary	2/740	27/21795	0.233044	0.677928	TRINITY_DN72838_c0_g1_i11;TRINITY_DN80567_c0_g6_i1	http://amigo.geneontology.org/amigo/term/GO:0048859	BP	2
GO:0048657	anther wall tapetum cell differentiation	2/740	27/21795	0.233044	0.677928	TRINITY_DN67350_c0_g1_i1;TRINITY_DN71355_c0_g1_i1	http://amigo.geneontology.org/amigo/term/GO:0048657	BP	2
GO:0019048	modulation by virus of host morphology or physiology	2/740	27/21795	0.233044	0.677928	TRINITY_DN77283_c0_g1_i4;TRINITY_DN77283_c0_g5_i1	http://amigo.geneontology.org/amigo/term/GO:0019048	BP	2
GO:0048655	anther wall tapetum morphogenesis	2/740	27/21795	0.233044	0.677928	TRINITY_DN67350_c0_g1_i1;TRINITY_DN71355_c0_g1_i1	http://amigo.geneontology.org/amigo/term/GO:0048655	BP	2
GO:0009606	tropism	7/740	147/21795	0.233408	0.677928	TRINITY_DN81011_c0_g2_i4;TRINITY_DN82697_c2_g3_i1;TRINITY_DN82731_c0_g4_i2;TRINITY_DN89409_c1_g3_i3;TRINITY_DN90446_c3_g2_i3;TRINITY_DN90446_c3_g4_i1;TRINITY_DN94495_c1_g1_i2	http://amigo.geneontology.org/amigo/term/GO:0009606	BP	7
GO:0045814	negative regulation of gene expression, epigenetic	5/740	97/21795	0.233645	0.677928	TRINITY_DN71200_c0_g1_i3;TRINITY_DN78441_c2_g1_i5;TRINITY_DN80593_c0_g6_i1;TRINITY_DN88658_c1_g3_i5;TRINITY_DN92454_c3_g1_i1	http://amigo.geneontology.org/amigo/term/GO:0045814	BP	5
GO:0009850	auxin metabolic process	5/740	97/21795	0.233645	0.677928	TRINITY_DN70135_c0_g2_i3;TRINITY_DN78368_c1_g5_i1;TRINITY_DN82731_c0_g4_i2;TRINITY_DN89409_c1_g3_i3;TRINITY_DN97255_c3_g3_i1	http://amigo.geneontology.org/amigo/term/GO:0009850	BP	5
GO:0009886	post-embryonic animal morphogenesis	15/740	357/21795	0.234543	0.677928	TRINITY_DN47904_c0_g1_i1;TRINITY_DN62693_c0_g1_i1;TRINITY_DN67350_c0_g1_i1;TRINITY_DN71355_c0_g1_i1;TRINITY_DN73792_c0_g1_i3;TRINITY_DN75510_c0_g5_i4;TRINITY_DN77419_c0_g1_i10;TRINITY_DN78637_c1_g1_i3;TRINITY_DN80331_c0_g6_i1;TRINITY_DN83949_c1_g2_i2;TRINITY_DN84017_c0_g8_i1;TRINITY_DN85439_c1_g1_i2;TRINITY_DN89459_c0_g1_i5;TRINITY_DN90042_c0_g4_i2;TRINITY_DN92796_c5_g1_i1	http://amigo.geneontology.org/amigo/term/GO:0009886	BP	15
GO:0010016	shoot system morphogenesis	15/740	357/21795	0.234543	0.677928	TRINITY_DN47904_c0_g1_i1;TRINITY_DN70135_c0_g2_i3;TRINITY_DN74175_c1_g3_i2;TRINITY_DN74875_c0_g2_i3;TRINITY_DN77419_c0_g1_i10;TRINITY_DN80331_c0_g6_i1;TRINITY_DN83199_c1_g4_i2;TRINITY_DN83949_c1_g2_i2;TRINITY_DN84017_c0_g8_i1;TRINITY_DN85755_c0_g3_i1;TRINITY_DN89459_c0_g1_i5;TRINITY_DN89614_c0_g3_i2;TRINITY_DN92710_c0_g1_i5;TRINITY_DN93786_c0_g2_i1;TRINITY_DN94961_c1_g4_i1	http://amigo.geneontology.org/amigo/term/GO:0010016	BP	15
GO:0072507	divalent inorganic cation homeostasis	6/740	122/21795	0.234637	0.677928	TRINITY_DN81530_c0_g1_i6;TRINITY_DN81807_c4_g1_i3;TRINITY_DN85813_c5_g1_i1;TRINITY_DN88917_c3_g2_i1;TRINITY_DN89234_c2_g5_i2;TRINITY_DN90668_c1_g3_i1	http://amigo.geneontology.org/amigo/term/GO:0072507	BP	6
GO:0006109	regulation of carbohydrate metabolic process	4/740	73/21795	0.235689	0.677928	TRINITY_DN72127_c0_g4_i3;TRINITY_DN74169_c0_g7_i1;TRINITY_DN87396_c1_g2_i6;TRINITY_DN94696_c0_g7_i1	http://amigo.geneontology.org/amigo/term/GO:0006109	BP	4
GO:0010941	regulation of cell death	13/740	304/21795	0.235696	0.677928	TRINITY_DN78300_c2_g8_i1;TRINITY_DN79255_c2_g3_i2;TRINITY_DN81627_c2_g1_i12;TRINITY_DN83068_c1_g1_i1;TRINITY_DN84755_c2_g5_i3;TRINITY_DN85192_c0_g2_i3;TRINITY_DN86288_c3_g4_i1;TRINITY_DN88648_c1_g2_i3;TRINITY_DN89843_c3_g1_i1;TRINITY_DN89843_c3_g2_i3;TRINITY_DN91119_c1_g1_i2;TRINITY_DN93473_c3_g1_i1;TRINITY_DN96995_c4_g4_i1	http://amigo.geneontology.org/amigo/term/GO:0010941	BP	13
GO:0046685	response to arsenic-containing substance	3/740	50/21795	0.240629	0.677928	TRINITY_DN79540_c0_g3_i4;TRINITY_DN88582_c7_g2_i10;TRINITY_DN91428_c1_g5_i1	http://amigo.geneontology.org/amigo/term/GO:0046685	BP	3
GO:0097009	energy homeostasis	1/740	8/21795	0.241479	0.677928	TRINITY_DN86288_c3_g4_i1	http://amigo.geneontology.org/amigo/term/GO:0097009	BP	1
GO:0040015	negative regulation of multicellular organism growth	1/740	8/21795	0.241479	0.677928	TRINITY_DN86583_c0_g3_i1	http://amigo.geneontology.org/amigo/term/GO:0040015	BP	1
GO:0060612	adipose tissue development	1/740	8/21795	0.241479	0.677928	TRINITY_DN86288_c3_g4_i1	http://amigo.geneontology.org/amigo/term/GO:0060612	BP	1
GO:0090287	regulation of cellular response to growth factor stimulus	1/740	8/21795	0.241479	0.677928	TRINITY_DN86288_c3_g4_i1	http://amigo.geneontology.org/amigo/term/GO:0090287	BP	1
GO:0048838	release of seed from dormancy	1/740	8/21795	0.241479	0.677928	TRINITY_DN64333_c0_g1_i2	http://amigo.geneontology.org/amigo/term/GO:0048838	BP	1
GO:0045861	negative regulation of proteolysis	1/740	8/21795	0.241479	0.677928	TRINITY_DN71772_c1_g1_i1	http://amigo.geneontology.org/amigo/term/GO:0045861	BP	1
GO:0021879	forebrain neuron differentiation	1/740	8/21795	0.241479	0.677928	TRINITY_DN86288_c3_g4_i1	http://amigo.geneontology.org/amigo/term/GO:0021879	BP	1
GO:0021872	forebrain generation of neurons	1/740	8/21795	0.241479	0.677928	TRINITY_DN86288_c3_g4_i1	http://amigo.geneontology.org/amigo/term/GO:0021872	BP	1
GO:0044088	regulation of vacuole organization	1/740	8/21795	0.241479	0.677928	TRINITY_DN88654_c0_g2_i8	http://amigo.geneontology.org/amigo/term/GO:0044088	BP	1
GO:0021854	hypothalamus development	1/740	8/21795	0.241479	0.677928	TRINITY_DN86288_c3_g4_i1	http://amigo.geneontology.org/amigo/term/GO:0021854	BP	1
GO:0046949	fatty-acyl-CoA biosynthetic process	1/740	8/21795	0.241479	0.677928	TRINITY_DN212533_c0_g1_i1	http://amigo.geneontology.org/amigo/term/GO:0046949	BP	1
GO:2000652	regulation of secondary cell wall biogenesis	1/740	8/21795	0.241479	0.677928	TRINITY_DN91368_c1_g3_i1	http://amigo.geneontology.org/amigo/term/GO:2000652	BP	1
GO:0008583	mystery cell differentiation	1/740	8/21795	0.241479	0.677928	TRINITY_DN71772_c1_g1_i1	http://amigo.geneontology.org/amigo/term/GO:0008583	BP	1
GO:0031321	ascospore-type prospore assembly	1/740	8/21795	0.241479	0.677928	TRINITY_DN75000_c0_g2_i3	http://amigo.geneontology.org/amigo/term/GO:0031321	BP	1
GO:0060613	fat pad development	1/740	8/21795	0.241479	0.677928	TRINITY_DN86288_c3_g4_i1	http://amigo.geneontology.org/amigo/term/GO:0060613	BP	1
GO:0010226	response to lithium ion	1/740	8/21795	0.241479	0.677928	TRINITY_DN85772_c0_g2_i2	http://amigo.geneontology.org/amigo/term/GO:0010226	BP	1
GO:0080028	nitrile biosynthetic process	1/740	8/21795	0.241479	0.677928	TRINITY_DN123479_c0_g1_i1	http://amigo.geneontology.org/amigo/term/GO:0080028	BP	1
GO:0021884	forebrain neuron development	1/740	8/21795	0.241479	0.677928	TRINITY_DN86288_c3_g4_i1	http://amigo.geneontology.org/amigo/term/GO:0021884	BP	1
GO:0021888	hypothalamus gonadotrophin-releasing hormone neuron development	1/740	8/21795	0.241479	0.677928	TRINITY_DN86288_c3_g4_i1	http://amigo.geneontology.org/amigo/term/GO:0021888	BP	1
GO:0072520	seminiferous tubule development	1/740	8/21795	0.241479	0.677928	TRINITY_DN86288_c3_g4_i1	http://amigo.geneontology.org/amigo/term/GO:0072520	BP	1
GO:0030509	BMP signaling pathway	1/740	8/21795	0.241479	0.677928	TRINITY_DN71772_c1_g1_i1	http://amigo.geneontology.org/amigo/term/GO:0030509	BP	1
GO:0009720	detection of hormone stimulus	1/740	8/21795	0.241479	0.677928	TRINITY_DN78565_c0_g1_i1	http://amigo.geneontology.org/amigo/term/GO:0009720	BP	1
GO:0010992	ubiquitin recycling	1/740	8/21795	0.241479	0.677928	TRINITY_DN86288_c3_g4_i1	http://amigo.geneontology.org/amigo/term/GO:0010992	BP	1
GO:0021979	hypothalamus cell differentiation	1/740	8/21795	0.241479	0.677928	TRINITY_DN86288_c3_g4_i1	http://amigo.geneontology.org/amigo/term/GO:0021979	BP	1
GO:1901661	quinone metabolic process	4/740	74/21795	0.243062	0.68029	TRINITY_DN68223_c0_g1_i1;TRINITY_DN75727_c2_g2_i4;TRINITY_DN81343_c1_g2_i1;TRINITY_DN82173_c5_g1_i1	http://amigo.geneontology.org/amigo/term/GO:1901661	BP	4
GO:0042446	hormone biosynthetic process	4/740	74/21795	0.243062	0.68029	TRINITY_DN78368_c1_g5_i1;TRINITY_DN82731_c0_g4_i2;TRINITY_DN83523_c1_g2_i2;TRINITY_DN89409_c1_g3_i3	http://amigo.geneontology.org/amigo/term/GO:0042446	BP	4
GO:0009615	response to virus	10/740	227/21795	0.244259	0.680685	TRINITY_DN70135_c0_g2_i3;TRINITY_DN73577_c5_g1_i1;TRINITY_DN74411_c1_g1_i1;TRINITY_DN78801_c1_g2_i1;TRINITY_DN79343_c0_g1_i2;TRINITY_DN85827_c2_g1_i4;TRINITY_DN88654_c0_g2_i8;TRINITY_DN92796_c5_g1_i1;TRINITY_DN93493_c1_g2_i5;TRINITY_DN215683_c0_g1_i1	http://amigo.geneontology.org/amigo/term/GO:0009615	BP	10
GO:0010015	root morphogenesis	17/740	414/21795	0.244348	0.680685	TRINITY_DN67782_c0_g1_i1;TRINITY_DN73484_c2_g1_i1;TRINITY_DN73792_c0_g1_i3;TRINITY_DN75510_c0_g5_i4;TRINITY_DN76571_c0_g1_i2;TRINITY_DN78637_c1_g1_i3;TRINITY_DN79224_c0_g1_i6;TRINITY_DN82276_c1_g3_i1;TRINITY_DN82530_c2_g2_i2;TRINITY_DN82731_c0_g4_i2;TRINITY_DN83527_c3_g5_i1;TRINITY_DN84017_c0_g8_i1;TRINITY_DN84843_c0_g1_i5;TRINITY_DN85439_c1_g1_i2;TRINITY_DN89409_c1_g3_i3;TRINITY_DN90446_c3_g2_i3…	http://amigo.geneontology.org/amigo/term/GO:0010015	BP	17
GO:0000187	activation of MAPK activity	2/740	28/21795	0.245729	0.680848	TRINITY_DN73594_c1_g1_i2;TRINITY_DN86288_c3_g4_i1	http://amigo.geneontology.org/amigo/term/GO:0000187	BP	2
GO:0043406	positive regulation of MAP kinase activity	2/740	28/21795	0.245729	0.680848	TRINITY_DN73594_c1_g1_i2;TRINITY_DN86288_c3_g4_i1	http://amigo.geneontology.org/amigo/term/GO:0043406	BP	2
GO:0006863	purine nucleobase transport	2/740	28/21795	0.245729	0.680848	TRINITY_DN58320_c0_g2_i1;TRINITY_DN66246_c0_g1_i1	http://amigo.geneontology.org/amigo/term/GO:0006863	BP	2
GO:0031048	chromatin silencing by small RNA	2/740	28/21795	0.245729	0.680848	TRINITY_DN78441_c2_g1_i5;TRINITY_DN92454_c3_g1_i1	http://amigo.geneontology.org/amigo/term/GO:0031048	BP	2
GO:0007143	female meiotic nuclear division	2/740	28/21795	0.245729	0.680848	TRINITY_DN77207_c2_g1_i3;TRINITY_DN86288_c3_g4_i1	http://amigo.geneontology.org/amigo/term/GO:0007143	BP	2
GO:0006970	response to osmotic stress	53/740	1415/21795	0.245823	0.680848	TRINITY_DN15130_c1_g1_i1;TRINITY_DN67891_c0_g1_i1;TRINITY_DN69022_c0_g1_i1;TRINITY_DN69811_c0_g2_i1;TRINITY_DN70380_c0_g5_i1;TRINITY_DN70871_c0_g1_i1;TRINITY_DN71532_c0_g1_i1;TRINITY_DN73594_c1_g1_i2;TRINITY_DN73577_c5_g1_i1;TRINITY_DN73998_c2_g4_i4;TRINITY_DN75177_c2_g3_i2;TRINITY_DN75896_c2_g1_i2;TRINITY_DN75913_c2_g1_i8;TRINITY_DN77570_c2_g2_i2;TRINITY_DN77953_c1_g1_i1;TRINITY_DN78503_c0_g1_i2…	http://amigo.geneontology.org/amigo/term/GO:0006970	BP	53
GO:0046777	protein autophosphorylation	16/740	388/21795	0.247526	0.684908	TRINITY_DN67047_c0_g1_i1;TRINITY_DN69048_c0_g1_i1;TRINITY_DN72421_c2_g4_i3;TRINITY_DN72765_c0_g1_i1;TRINITY_DN73594_c1_g1_i2;TRINITY_DN77570_c2_g2_i2;TRINITY_DN79341_c3_g2_i1;TRINITY_DN80442_c2_g1_i2;TRINITY_DN81281_c4_g1_i1;TRINITY_DN81909_c1_g3_i1;TRINITY_DN83013_c7_g9_i1;TRINITY_DN86214_c2_g5_i1;TRINITY_DN86268_c1_g4_i4;TRINITY_DN87382_c0_g1_i2;TRINITY_DN88390_c1_g2_i3;TRINITY_DN88612_c2_g2_i4	http://amigo.geneontology.org/amigo/term/GO:0046777	BP	16
GO:0043405	regulation of MAP kinase activity	4/740	75/21795	0.250486	0.692436	TRINITY_DN71557_c0_g1_i11;TRINITY_DN73594_c1_g1_i2;TRINITY_DN75913_c2_g1_i8;TRINITY_DN86288_c3_g4_i1	http://amigo.geneontology.org/amigo/term/GO:0043405	BP	4
GO:0055076	transition metal ion homeostasis	8/740	177/21795	0.254371	0.701829	TRINITY_DN68418_c0_g1_i1;TRINITY_DN70640_c1_g1_i2;TRINITY_DN74269_c0_g3_i1;TRINITY_DN74269_c0_g1_i10;TRINITY_DN85813_c5_g1_i1;TRINITY_DN89234_c2_g5_i2;TRINITY_DN90136_c5_g5_i2;TRINITY_DN90668_c1_g3_i1	http://amigo.geneontology.org/amigo/term/GO:0055076	BP	8
GO:0006885	regulation of pH	4/740	76/21795	0.257957	0.70816	TRINITY_DN77751_c2_g5_i2;TRINITY_DN83913_c3_g5_i1;TRINITY_DN89875_c4_g4_i5;TRINITY_DN96183_c3_g5_i1	http://amigo.geneontology.org/amigo/term/GO:0006885	BP	4
GO:0071902	positive regulation of protein serine/threonine kinase activity	2/740	29/21795	0.258439	0.70816	TRINITY_DN73594_c1_g1_i2;TRINITY_DN86288_c3_g4_i1	http://amigo.geneontology.org/amigo/term/GO:0071902	BP	2
GO:0048455	stamen formation	2/740	29/21795	0.258439	0.70816	TRINITY_DN67350_c0_g1_i1;TRINITY_DN71355_c0_g1_i1	http://amigo.geneontology.org/amigo/term/GO:0048455	BP	2
GO:0007140	male meiotic nuclear division	2/740	29/21795	0.258439	0.70816	TRINITY_DN77207_c2_g1_i3;TRINITY_DN86288_c3_g4_i1	http://amigo.geneontology.org/amigo/term/GO:0007140	BP	2
GO:0043647	inositol phosphate metabolic process	2/740	29/21795	0.258439	0.70816	TRINITY_DN75732_c1_g1_i6;TRINITY_DN84005_c0_g1_i6	http://amigo.geneontology.org/amigo/term/GO:0043647	BP	2
GO:0016131	brassinosteroid metabolic process	3/740	52/21795	0.258964	0.70816	TRINITY_DN83523_c1_g2_i2;TRINITY_DN90264_c0_g4_i2;TRINITY_DN92265_c8_g3_i1	http://amigo.geneontology.org/amigo/term/GO:0016131	BP	3
GO:0043255	regulation of carbohydrate biosynthetic process	3/740	52/21795	0.258964	0.70816	TRINITY_DN72127_c0_g4_i3;TRINITY_DN74169_c0_g7_i1;TRINITY_DN87396_c1_g2_i6	http://amigo.geneontology.org/amigo/term/GO:0043255	BP	3
GO:0051302	regulation of cell division	5/740	101/21795	0.259119	0.70816	TRINITY_DN67047_c0_g1_i1;TRINITY_DN72765_c0_g1_i1;TRINITY_DN81281_c4_g1_i1;TRINITY_DN87015_c1_g5_i3;TRINITY_DN94950_c0_g4_i1	http://amigo.geneontology.org/amigo/term/GO:0051302	BP	5
GO:0009910	negative regulation of flower development	5/740	102/21795	0.265589	0.712812	TRINITY_DN74875_c0_g2_i3;TRINITY_DN76957_c0_g4_i4;TRINITY_DN86713_c0_g5_i3;TRINITY_DN93466_c1_g3_i1;TRINITY_DN94882_c0_g4_i1	http://amigo.geneontology.org/amigo/term/GO:0009910	BP	5
GO:0010599	production of lsiRNA involved in RNA interference	1/740	9/21795	0.267243	0.712812	TRINITY_DN81280_c0_g1_i1	http://amigo.geneontology.org/amigo/term/GO:0010599	BP	1
GO:0015714	phosphoenolpyruvate transport	1/740	9/21795	0.267243	0.712812	TRINITY_DN91981_c0_g3_i2	http://amigo.geneontology.org/amigo/term/GO:0015714	BP	1
GO:0036092	phosphatidylinositol-3-phosphate biosynthetic process	1/740	9/21795	0.267243	0.712812	TRINITY_DN83157_c6_g4_i1	http://amigo.geneontology.org/amigo/term/GO:0036092	BP	1
GO:0009652	thigmotropism	1/740	9/21795	0.267243	0.712812	TRINITY_DN94495_c1_g1_i2	http://amigo.geneontology.org/amigo/term/GO:0009652	BP	1
GO:0048227	plasma membrane to endosome transport	1/740	9/21795	0.267243	0.712812	TRINITY_DN73386_c0_g5_i1	http://amigo.geneontology.org/amigo/term/GO:0048227	BP	1
GO:0051574	positive regulation of histone H3-K9 methylation	1/740	9/21795	0.267243	0.712812	TRINITY_DN66001_c0_g1_i2	http://amigo.geneontology.org/amigo/term/GO:0051574	BP	1
GO:0010528	regulation of transposition	1/740	9/21795	0.267243	0.712812	TRINITY_DN66001_c0_g1_i2	http://amigo.geneontology.org/amigo/term/GO:0010528	BP	1
GO:0031150	sorocarp stalk development	1/740	9/21795	0.267243	0.712812	TRINITY_DN43850_c0_g1_i1	http://amigo.geneontology.org/amigo/term/GO:0031150	BP	1
GO:0051176	positive regulation of sulfur metabolic process	1/740	9/21795	0.267243	0.712812	TRINITY_DN70602_c0_g2_i1	http://amigo.geneontology.org/amigo/term/GO:0051176	BP	1
GO:0031149	sorocarp stalk cell differentiation	1/740	9/21795	0.267243	0.712812	TRINITY_DN43850_c0_g1_i1	http://amigo.geneontology.org/amigo/term/GO:0031149	BP	1
GO:0031148	DIF-1 biosynthetic process	1/740	9/21795	0.267243	0.712812	TRINITY_DN43850_c0_g1_i1	http://amigo.geneontology.org/amigo/term/GO:0031148	BP	1
GO:0033523	histone H2B ubiquitination	1/740	9/21795	0.267243	0.712812	TRINITY_DN74875_c0_g2_i3	http://amigo.geneontology.org/amigo/term/GO:0033523	BP	1
GO:0034329	cell junction assembly	1/740	9/21795	0.267243	0.712812	TRINITY_DN94190_c2_g1_i20	http://amigo.geneontology.org/amigo/term/GO:0034329	BP	1
GO:0021954	central nervous system neuron development	1/740	9/21795	0.267243	0.712812	TRINITY_DN86288_c3_g4_i1	http://amigo.geneontology.org/amigo/term/GO:0021954	BP	1
GO:0021953	central nervous system neuron differentiation	1/740	9/21795	0.267243	0.712812	TRINITY_DN86288_c3_g4_i1	http://amigo.geneontology.org/amigo/term/GO:0021953	BP	1
GO:0090101	negative regulation of transmembrane receptor protein serine/threonine kinase signaling pathway	1/740	9/21795	0.267243	0.712812	TRINITY_DN86288_c3_g4_i1	http://amigo.geneontology.org/amigo/term/GO:0090101	BP	1
GO:0009630	gravitropism	6/740	128/21795	0.268733	0.716125	TRINITY_DN81011_c0_g2_i4;TRINITY_DN82697_c2_g3_i1;TRINITY_DN82731_c0_g4_i2;TRINITY_DN89409_c1_g3_i3;TRINITY_DN90446_c3_g2_i3;TRINITY_DN90446_c3_g4_i1	http://amigo.geneontology.org/amigo/term/GO:0009630	BP	6
GO:0031396	regulation of protein ubiquitination	2/740	30/21795	0.271156	0.716626	TRINITY_DN80224_c0_g2_i1;TRINITY_DN86288_c3_g4_i1	http://amigo.geneontology.org/amigo/term/GO:0031396	BP	2
GO:0009750	response to fructose	2/740	30/21795	0.271156	0.716626	TRINITY_DN71723_c2_g1_i1;TRINITY_DN92577_c0_g1_i5	http://amigo.geneontology.org/amigo/term/GO:0009750	BP	2
GO:0046460	neutral lipid biosynthetic process	2/740	30/21795	0.271156	0.716626	TRINITY_DN68864_c0_g1_i6;TRINITY_DN91267_c0_g4_i1	http://amigo.geneontology.org/amigo/term/GO:0046460	BP	2
GO:0048448	stamen morphogenesis	2/740	30/21795	0.271156	0.716626	TRINITY_DN67350_c0_g1_i1;TRINITY_DN71355_c0_g1_i1	http://amigo.geneontology.org/amigo/term/GO:0048448	BP	2
GO:1901679	nucleotide transmembrane transport	2/740	30/21795	0.271156	0.716626	TRINITY_DN82761_c0_g1_i6;TRINITY_DN84932_c0_g1_i4	http://amigo.geneontology.org/amigo/term/GO:1901679	BP	2
GO:0048658	anther wall tapetum development	2/740	30/21795	0.271156	0.716626	TRINITY_DN67350_c0_g1_i1;TRINITY_DN71355_c0_g1_i1	http://amigo.geneontology.org/amigo/term/GO:0048658	BP	2
GO:0051090	regulation of sequence-specific DNA binding transcription factor activity	2/740	30/21795	0.271156	0.716626	TRINITY_DN80224_c0_g2_i1;TRINITY_DN86288_c3_g4_i1	http://amigo.geneontology.org/amigo/term/GO:0051090	BP	2
GO:0045089	positive regulation of innate immune response	4/740	78/21795	0.273026	0.720463	TRINITY_DN77283_c0_g1_i4;TRINITY_DN77283_c0_g5_i1;TRINITY_DN80224_c0_g2_i1;TRINITY_DN86288_c3_g4_i1	http://amigo.geneontology.org/amigo/term/GO:0045089	BP	4
GO:0051173	positive regulation of nitrogen compound metabolic process	16/740	396/21795	0.273107	0.720463	TRINITY_DN62693_c0_g1_i1;TRINITY_DN65799_c0_g1_i3;TRINITY_DN68780_c0_g2_i2;TRINITY_DN68775_c1_g1_i1;TRINITY_DN68815_c0_g1_i1;TRINITY_DN69811_c0_g2_i1;TRINITY_DN70602_c0_g2_i1;TRINITY_DN72127_c0_g4_i3;TRINITY_DN73294_c5_g2_i2;TRINITY_DN73594_c1_g1_i2;TRINITY_DN79180_c4_g2_i1;TRINITY_DN80224_c0_g2_i1;TRINITY_DN81577_c0_g5_i2;TRINITY_DN83499_c1_g7_i1;TRINITY_DN86288_c3_g4_i1;TRINITY_DN93473_c3_g1_i1	http://amigo.geneontology.org/amigo/term/GO:0051173	BP	16
GO:0009664	plant-type cell wall organization	7/740	155/21795	0.274737	0.722585	TRINITY_DN68971_c0_g1_i1;TRINITY_DN74830_c0_g1_i3;TRINITY_DN77500_c3_g6_i1;TRINITY_DN83762_c2_g3_i1;TRINITY_DN84017_c0_g8_i1;TRINITY_DN91863_c1_g3_i1;TRINITY_DN92693_c1_g2_i3	http://amigo.geneontology.org/amigo/term/GO:0009664	BP	7
GO:0006352	DNA-templated transcription, initiation	3/740	54/21795	0.277474	0.726671	TRINITY_DN71317_c1_g1_i3;TRINITY_DN71772_c1_g1_i1;TRINITY_DN86288_c3_g4_i1	http://amigo.geneontology.org/amigo/term/GO:0006352	BP	3
GO:0006571	tyrosine biosynthetic process	2/740	31/21795	0.283865	0.730583	TRINITY_DN72971_c0_g1_i3;TRINITY_DN82036_c3_g1_i3	http://amigo.geneontology.org/amigo/term/GO:0006571	BP	2
GO:0006906	vesicle fusion	2/740	31/21795	0.283865	0.730583	TRINITY_DN74186_c0_g1_i3;TRINITY_DN75000_c0_g2_i3	http://amigo.geneontology.org/amigo/term/GO:0006906	BP	2
GO:0016558	protein import into peroxisome matrix	2/740	31/21795	0.283865	0.730583	TRINITY_DN89072_c0_g1_i1;TRINITY_DN92311_c0_g4_i4	http://amigo.geneontology.org/amigo/term/GO:0016558	BP	2
GO:0015780	nucleotide-sugar transport	2/740	31/21795	0.283865	0.730583	TRINITY_DN82761_c0_g1_i6;TRINITY_DN84932_c0_g1_i4	http://amigo.geneontology.org/amigo/term/GO:0015780	BP	2
GO:0009744	response to sucrose	5/740	105/21795	0.285206	0.730583	TRINITY_DN69811_c0_g2_i1;TRINITY_DN71723_c2_g1_i1;TRINITY_DN91657_c1_g7_i1;TRINITY_DN91981_c0_g3_i2;TRINITY_DN92577_c0_g1_i5	http://amigo.geneontology.org/amigo/term/GO:0009744	BP	5
GO:0009926	auxin polar transport	11/740	264/21795	0.286767	0.730583	TRINITY_DN73594_c1_g1_i2;TRINITY_DN77590_c0_g5_i1;TRINITY_DN77590_c0_g8_i1;TRINITY_DN79488_c1_g6_i1;TRINITY_DN85778_c2_g7_i1;TRINITY_DN90446_c3_g2_i3;TRINITY_DN90446_c3_g4_i1;TRINITY_DN92713_c1_g5_i1;TRINITY_DN94747_c1_g1_i2;TRINITY_DN94747_c1_g4_i2;TRINITY_DN96704_c2_g1_i1	http://amigo.geneontology.org/amigo/term/GO:0009926	BP	11
GO:0009958	positive gravitropism	3/740	55/21795	0.286778	0.730583	TRINITY_DN82697_c2_g3_i1;TRINITY_DN82731_c0_g4_i2;TRINITY_DN89409_c1_g3_i3	http://amigo.geneontology.org/amigo/term/GO:0009958	BP	3
GO:0055069	zinc ion homeostasis	3/740	55/21795	0.286778	0.730583	TRINITY_DN85813_c5_g1_i1;TRINITY_DN89234_c2_g5_i2;TRINITY_DN90668_c1_g3_i1	http://amigo.geneontology.org/amigo/term/GO:0055069	BP	3
GO:0045595	regulation of cell differentiation	11/740	265/21795	0.290865	0.730583	TRINITY_DN43850_c0_g1_i1;TRINITY_DN71392_c0_g1_i7;TRINITY_DN74175_c1_g3_i2;TRINITY_DN77570_c2_g2_i2;TRINITY_DN81280_c0_g1_i1;TRINITY_DN82731_c0_g4_i2;TRINITY_DN85755_c0_g3_i1;TRINITY_DN87015_c1_g5_i3;TRINITY_DN89409_c1_g3_i3;TRINITY_DN92946_c1_g3_i6;TRINITY_DN94190_c2_g1_i20	http://amigo.geneontology.org/amigo/term/GO:0045595	BP	11
GO:0072334	UDP-galactose transmembrane transport	1/740	10/21795	0.292132	0.730583	TRINITY_DN82761_c0_g1_i6	http://amigo.geneontology.org/amigo/term/GO:0072334	BP	1
GO:0009643	photosynthetic acclimation	1/740	10/21795	0.292132	0.730583	TRINITY_DN91981_c0_g3_i2	http://amigo.geneontology.org/amigo/term/GO:0009643	BP	1
GO:0046530	photoreceptor cell differentiation	1/740	10/21795	0.292132	0.730583	TRINITY_DN80224_c0_g2_i1	http://amigo.geneontology.org/amigo/term/GO:0046530	BP	1
GO:0015854	guanine transport	1/740	10/21795	0.292132	0.730583	TRINITY_DN58320_c0_g2_i1	http://amigo.geneontology.org/amigo/term/GO:0015854	BP	1
GO:0043627	response to estrogen	1/740	10/21795	0.292132	0.730583	TRINITY_DN88654_c0_g2_i8	http://amigo.geneontology.org/amigo/term/GO:0043627	BP	1
GO:0015712	hexose phosphate transport	1/740	10/21795	0.292132	0.730583	TRINITY_DN91981_c0_g3_i2	http://amigo.geneontology.org/amigo/term/GO:0015712	BP	1
GO:0060446	branching involved in open tracheal system development	1/740	10/21795	0.292132	0.730583	TRINITY_DN69073_c2_g1_i1	http://amigo.geneontology.org/amigo/term/GO:0060446	BP	1
GO:0006348	chromatin silencing at telomere	1/740	10/21795	0.292132	0.730583	TRINITY_DN80593_c0_g6_i1	http://amigo.geneontology.org/amigo/term/GO:0006348	BP	1
GO:0021536	diencephalon development	1/740	10/21795	0.292132	0.730583	TRINITY_DN86288_c3_g4_i1	http://amigo.geneontology.org/amigo/term/GO:0021536	BP	1
GO:0045740	positive regulation of DNA replication	1/740	10/21795	0.292132	0.730583	TRINITY_DN79180_c4_g2_i1	http://amigo.geneontology.org/amigo/term/GO:0045740	BP	1
GO:0009772	photosynthetic electron transport in photosystem II	1/740	10/21795	0.292132	0.730583	TRINITY_DN81945_c0_g8_i2	http://amigo.geneontology.org/amigo/term/GO:0009772	BP	1
GO:0080144	amino acid homeostasis	1/740	10/21795	0.292132	0.730583	TRINITY_DN88544_c0_g3_i4	http://amigo.geneontology.org/amigo/term/GO:0080144	BP	1
GO:0015760	glucose-6-phosphate transport	1/740	10/21795	0.292132	0.730583	TRINITY_DN91981_c0_g3_i2	http://amigo.geneontology.org/amigo/term/GO:0015760	BP	1
GO:0090087	regulation of peptide transport	1/740	10/21795	0.292132	0.730583	TRINITY_DN79998_c5_g2_i1	http://amigo.geneontology.org/amigo/term/GO:0090087	BP	1
GO:0032973	amino acid export	1/740	10/21795	0.292132	0.730583	TRINITY_DN88544_c0_g3_i4	http://amigo.geneontology.org/amigo/term/GO:0032973	BP	1
GO:0032479	regulation of type I interferon production	1/740	10/21795	0.292132	0.730583	TRINITY_DN86288_c3_g4_i1	http://amigo.geneontology.org/amigo/term/GO:0032479	BP	1
GO:0035666	TRIF-dependent toll-like receptor signaling pathway	1/740	10/21795	0.292132	0.730583	TRINITY_DN86288_c3_g4_i1	http://amigo.geneontology.org/amigo/term/GO:0035666	BP	1
GO:0031960	response to corticosteroid	1/740	10/21795	0.292132	0.730583	TRINITY_DN75152_c3_g2_i1	http://amigo.geneontology.org/amigo/term/GO:0031960	BP	1
GO:0043101	purine-containing compound salvage	1/740	10/21795	0.292132	0.730583	TRINITY_DN74311_c0_g3_i13	http://amigo.geneontology.org/amigo/term/GO:0043101	BP	1
GO:0009950	dorsal/ventral axis specification	1/740	10/21795	0.292132	0.730583	TRINITY_DN71772_c1_g1_i1	http://amigo.geneontology.org/amigo/term/GO:0009950	BP	1
GO:0051384	response to glucocorticoid	1/740	10/21795	0.292132	0.730583	TRINITY_DN75152_c3_g2_i1	http://amigo.geneontology.org/amigo/term/GO:0051384	BP	1
GO:0010190	cytochrome b6f complex assembly	1/740	10/21795	0.292132	0.730583	TRINITY_DN78350_c0_g1_i4	http://amigo.geneontology.org/amigo/term/GO:0010190	BP	1
GO:0002756	MyD88-independent toll-like receptor signaling pathway	1/740	10/21795	0.292132	0.730583	TRINITY_DN86288_c3_g4_i1	http://amigo.geneontology.org/amigo/term/GO:0002756	BP	1
GO:0070734	histone H3-K27 methylation	1/740	10/21795	0.292132	0.730583	TRINITY_DN93466_c1_g3_i1	http://amigo.geneontology.org/amigo/term/GO:0070734	BP	1
GO:0015785	UDP-galactose transport	1/740	10/21795	0.292132	0.730583	TRINITY_DN82761_c0_g1_i6	http://amigo.geneontology.org/amigo/term/GO:0015785	BP	1
GO:0010225	response to UV-C	1/740	10/21795	0.292132	0.730583	TRINITY_DN75913_c2_g1_i8	http://amigo.geneontology.org/amigo/term/GO:0010225	BP	1
GO:0048354	mucilage biosynthetic process involved in seed coat development	1/740	10/21795	0.292132	0.730583	TRINITY_DN70539_c0_g1_i1	http://amigo.geneontology.org/amigo/term/GO:0048354	BP	1
GO:0007144	female meiosis I	1/740	10/21795	0.292132	0.730583	TRINITY_DN86288_c3_g4_i1	http://amigo.geneontology.org/amigo/term/GO:0007144	BP	1
GO:0007141	male meiosis I	1/740	10/21795	0.292132	0.730583	TRINITY_DN86288_c3_g4_i1	http://amigo.geneontology.org/amigo/term/GO:0007141	BP	1
GO:0071554	cell wall organization or biogenesis	22/740	568/21795	0.292847	0.731738	TRINITY_DN54042_c0_g1_i1;TRINITY_DN66170_c0_g1_i1;TRINITY_DN68815_c0_g1_i1;TRINITY_DN68971_c0_g1_i1;TRINITY_DN70951_c0_g1_i9;TRINITY_DN74169_c0_g7_i1;TRINITY_DN74830_c0_g1_i3;TRINITY_DN74828_c0_g1_i1;TRINITY_DN75350_c1_g3_i2;TRINITY_DN77500_c3_g6_i1;TRINITY_DN78565_c0_g1_i1;TRINITY_DN83499_c1_g7_i1;TRINITY_DN83762_c2_g3_i1;TRINITY_DN84017_c0_g8_i1;TRINITY_DN86907_c3_g4_i3;TRINITY_DN87313_c1_g1_i9…	http://amigo.geneontology.org/amigo/term/GO:0071554	BP	22
GO:0033500	carbohydrate homeostasis	3/740	56/21795	0.296106	0.737168	TRINITY_DN66576_c0_g1_i2;TRINITY_DN81627_c2_g1_i12;TRINITY_DN85344_c1_g3_i2	http://amigo.geneontology.org/amigo/term/GO:0033500	BP	3
GO:0051017	actin filament bundle assembly	2/740	32/21795	0.296553	0.737168	TRINITY_DN74764_c2_g1_i1;TRINITY_DN95483_c2_g1_i3	http://amigo.geneontology.org/amigo/term/GO:0051017	BP	2
GO:0061572	actin filament bundle organization	2/740	32/21795	0.296553	0.737168	TRINITY_DN74764_c2_g1_i1;TRINITY_DN95483_c2_g1_i3	http://amigo.geneontology.org/amigo/term/GO:0061572	BP	2
GO:0008202	steroid metabolic process	6/740	133/21795	0.298018	0.740171	TRINITY_DN75355_c1_g1_i13;TRINITY_DN83523_c1_g2_i2;TRINITY_DN86880_c1_g4_i2;TRINITY_DN90264_c0_g4_i2;TRINITY_DN92265_c8_g3_i1;TRINITY_DN95812_c1_g1_i9	http://amigo.geneontology.org/amigo/term/GO:0008202	BP	6
GO:0051094	positive regulation of developmental process	9/740	214/21795	0.303918	0.748872	TRINITY_DN62693_c0_g1_i1;TRINITY_DN67970_c1_g1_i1;TRINITY_DN73294_c5_g2_i2;TRINITY_DN74175_c1_g3_i2;TRINITY_DN78441_c2_g1_i5;TRINITY_DN79447_c3_g1_i1;TRINITY_DN85344_c1_g3_i2;TRINITY_DN93504_c0_g1_i1;TRINITY_DN93786_c0_g2_i1	http://amigo.geneontology.org/amigo/term/GO:0051094	BP	9
GO:0032259	methylation	17/740	433/21795	0.304116	0.748872	TRINITY_DN43850_c0_g1_i1;TRINITY_DN67876_c0_g1_i2;TRINITY_DN77123_c1_g2_i8;TRINITY_DN79615_c0_g4_i2;TRINITY_DN80593_c0_g6_i1;TRINITY_DN80750_c0_g2_i6;TRINITY_DN84723_c0_g4_i1;TRINITY_DN89640_c2_g2_i2;TRINITY_DN89895_c2_g2_i1;TRINITY_DN89895_c2_g5_i6;TRINITY_DN92040_c0_g1_i11;TRINITY_DN92439_c6_g2_i2;TRINITY_DN92796_c5_g1_i1;TRINITY_DN93493_c1_g2_i5;TRINITY_DN93466_c1_g3_i1;TRINITY_DN93991_c2_g2_i…	http://amigo.geneontology.org/amigo/term/GO:0032259	BP	17
GO:0042631	cellular response to water deprivation	3/740	57/21795	0.305451	0.750309	TRINITY_DN72144_c3_g1_i1;TRINITY_DN84205_c2_g1_i2;TRINITY_DN88382_c0_g2_i1	http://amigo.geneontology.org/amigo/term/GO:0042631	BP	3
GO:0071462	cellular response to water stimulus	3/740	57/21795	0.305451	0.750309	TRINITY_DN72144_c3_g1_i1;TRINITY_DN84205_c2_g1_i2;TRINITY_DN88382_c0_g2_i1	http://amigo.geneontology.org/amigo/term/GO:0071462	BP	3
GO:0045493	xylan catabolic process	2/740	33/21795	0.309206	0.754159	TRINITY_DN75350_c1_g3_i2;TRINITY_DN94611_c6_g4_i1	http://amigo.geneontology.org/amigo/term/GO:0045493	BP	2
GO:0009686	gibberellin biosynthetic process	2/740	33/21795	0.309206	0.754159	TRINITY_DN71536_c0_g1_i2;TRINITY_DN71536_c0_g2_i4	http://amigo.geneontology.org/amigo/term/GO:0009686	BP	2
GO:0016102	diterpenoid biosynthetic process	2/740	33/21795	0.309206	0.754159	TRINITY_DN71536_c0_g1_i2;TRINITY_DN71536_c0_g2_i4	http://amigo.geneontology.org/amigo/term/GO:0016102	BP	2
GO:0006878	cellular copper ion homeostasis	2/740	33/21795	0.309206	0.754159	TRINITY_DN74269_c0_g3_i1;TRINITY_DN74269_c0_g1_i10	http://amigo.geneontology.org/amigo/term/GO:0006878	BP	2
GO:0072531	pyrimidine-containing compound transmembrane transport	2/740	33/21795	0.309206	0.754159	TRINITY_DN82761_c0_g1_i6;TRINITY_DN84932_c0_g1_i4	http://amigo.geneontology.org/amigo/term/GO:0072531	BP	2
GO:0010205	photoinhibition	3/740	58/21795	0.314807	0.756623	TRINITY_DN75808_c2_g1_i1;TRINITY_DN95543_c0_g1_i1;TRINITY_DN95543_c1_g3_i1	http://amigo.geneontology.org/amigo/term/GO:0010205	BP	3
GO:0010629	negative regulation of gene expression	25/740	660/21795	0.315081	0.756623	TRINITY_DN65780_c0_g1_i2;TRINITY_DN68559_c0_g1_i2;TRINITY_DN70135_c0_g2_i3;TRINITY_DN70682_c0_g1_i1;TRINITY_DN71200_c0_g1_i3;TRINITY_DN71772_c1_g1_i1;TRINITY_DN74039_c0_g2_i1;TRINITY_DN77123_c1_g2_i8;TRINITY_DN77451_c0_g4_i1;TRINITY_DN78441_c2_g1_i5;TRINITY_DN80593_c0_g6_i1;TRINITY_DN81280_c0_g1_i1;TRINITY_DN84109_c0_g2_i2;TRINITY_DN84723_c0_g4_i1;TRINITY_DN85827_c2_g1_i4;TRINITY_DN86288_c3_g4_i1…	http://amigo.geneontology.org/amigo/term/GO:0010629	BP	25
GO:0030856	regulation of epithelial cell differentiation	1/740	11/21795	0.316177	0.756623	TRINITY_DN94190_c2_g1_i20	http://amigo.geneontology.org/amigo/term/GO:0030856	BP	1
GO:0045841	negative regulation of mitotic metaphase/anaphase transition	1/740	11/21795	0.316177	0.756623	TRINITY_DN85106_c2_g3_i3	http://amigo.geneontology.org/amigo/term/GO:0045841	BP	1
GO:0045824	negative regulation of innate immune response	1/740	11/21795	0.316177	0.756623	TRINITY_DN94882_c0_g4_i1	http://amigo.geneontology.org/amigo/term/GO:0045824	BP	1
GO:1901342	regulation of vasculature development	1/740	11/21795	0.316177	0.756623	TRINITY_DN94190_c2_g1_i20	http://amigo.geneontology.org/amigo/term/GO:1901342	BP	1
GO:0071585	detoxification of cadmium ion	1/740	11/21795	0.316177	0.756623	TRINITY_DN79447_c3_g1_i1	http://amigo.geneontology.org/amigo/term/GO:0071585	BP	1
GO:0045765	regulation of angiogenesis	1/740	11/21795	0.316177	0.756623	TRINITY_DN94190_c2_g1_i20	http://amigo.geneontology.org/amigo/term/GO:0045765	BP	1
GO:0045839	negative regulation of mitotic nuclear division	1/740	11/21795	0.316177	0.756623	TRINITY_DN85106_c2_g3_i3	http://amigo.geneontology.org/amigo/term/GO:0045839	BP	1
GO:0051570	regulation of histone H3-K9 methylation	1/740	11/21795	0.316177	0.756623	TRINITY_DN66001_c0_g1_i2	http://amigo.geneontology.org/amigo/term/GO:0051570	BP	1
GO:0072708	response to sorbitol	1/740	11/21795	0.316177	0.756623	TRINITY_DN91657_c1_g7_i1	http://amigo.geneontology.org/amigo/term/GO:0072708	BP	1
GO:0050777	negative regulation of immune response	1/740	11/21795	0.316177	0.756623	TRINITY_DN94882_c0_g4_i1	http://amigo.geneontology.org/amigo/term/GO:0050777	BP	1
GO:0008585	female gonad development	1/740	11/21795	0.316177	0.756623	TRINITY_DN86288_c3_g4_i1	http://amigo.geneontology.org/amigo/term/GO:0008585	BP	1
GO:0032496	response to lipopolysaccharide	1/740	11/21795	0.316177	0.756623	TRINITY_DN75152_c3_g2_i1	http://amigo.geneontology.org/amigo/term/GO:0032496	BP	1
GO:1990170	stress response to cadmium ion	1/740	11/21795	0.316177	0.756623	TRINITY_DN79447_c3_g1_i1	http://amigo.geneontology.org/amigo/term/GO:1990170	BP	1
GO:0021761	limbic system development	1/740	11/21795	0.316177	0.756623	TRINITY_DN86288_c3_g4_i1	http://amigo.geneontology.org/amigo/term/GO:0021761	BP	1
GO:0030534	adult behavior	1/740	11/21795	0.316177	0.756623	TRINITY_DN80224_c0_g2_i1	http://amigo.geneontology.org/amigo/term/GO:0030534	BP	1
GO:0001701	in utero embryonic development	1/740	11/21795	0.316177	0.756623	TRINITY_DN94190_c2_g1_i20	http://amigo.geneontology.org/amigo/term/GO:0001701	BP	1
GO:0006367	transcription initiation from RNA polymerase II promoter	2/740	34/21795	0.321812	0.765033	TRINITY_DN71772_c1_g1_i1;TRINITY_DN86288_c3_g4_i1	http://amigo.geneontology.org/amigo/term/GO:0006367	BP	2
GO:0000188	inactivation of MAPK activity	2/740	34/21795	0.321812	0.765033	TRINITY_DN71557_c0_g1_i11;TRINITY_DN75913_c2_g1_i8	http://amigo.geneontology.org/amigo/term/GO:0000188	BP	2
GO:0043410	positive regulation of MAPK cascade	2/740	34/21795	0.321812	0.765033	TRINITY_DN73594_c1_g1_i2;TRINITY_DN86288_c3_g4_i1	http://amigo.geneontology.org/amigo/term/GO:0043410	BP	2
GO:0048467	gynoecium development	7/740	164/21795	0.32323	0.767229	TRINITY_DN67047_c0_g1_i1;TRINITY_DN72627_c2_g1_i3;TRINITY_DN72765_c0_g1_i1;TRINITY_DN76233_c0_g1_i1;TRINITY_DN81281_c4_g1_i1;TRINITY_DN82731_c0_g4_i2;TRINITY_DN89409_c1_g3_i3	http://amigo.geneontology.org/amigo/term/GO:0048467	BP	7
GO:0009556	microsporogenesis	3/740	59/21795	0.32417	0.768106	TRINITY_DN73585_c1_g5_i1;TRINITY_DN86620_c1_g4_i2;TRINITY_DN86620_c1_g3_i5	http://amigo.geneontology.org/amigo/term/GO:0009556	BP	3
GO:0009626	plant-type hypersensitive response	4/740	85/21795	0.326709	0.773489	TRINITY_DN50025_c0_g1_i1;TRINITY_DN75702_c2_g1_i1;TRINITY_DN84755_c2_g5_i3;TRINITY_DN86284_c4_g7_i1	http://amigo.geneontology.org/amigo/term/GO:0009626	BP	4
GO:0051603	proteolysis involved in cellular protein catabolic process	14/740	357/21795	0.32885	0.775556	TRINITY_DN71772_c1_g1_i1;TRINITY_DN74875_c0_g2_i3;TRINITY_DN76249_c2_g1_i6;TRINITY_DN76437_c5_g2_i1;TRINITY_DN77139_c0_g2_i1;TRINITY_DN77139_c0_g3_i1;TRINITY_DN80224_c0_g2_i1;TRINITY_DN85716_c0_g1_i22;TRINITY_DN86288_c3_g4_i1;TRINITY_DN88013_c3_g8_i1;TRINITY_DN89072_c0_g1_i1;TRINITY_DN90238_c5_g3_i3;TRINITY_DN92311_c0_g4_i4;TRINITY_DN95963_c2_g3_i2	http://amigo.geneontology.org/amigo/term/GO:0051603	BP	14
GO:0010073	meristem maintenance	10/740	247/21795	0.33044	0.775556	TRINITY_DN62693_c0_g1_i1;TRINITY_DN71392_c0_g1_i7;TRINITY_DN81280_c0_g1_i1;TRINITY_DN82731_c0_g4_i2;TRINITY_DN83197_c0_g1_i2;TRINITY_DN85755_c0_g3_i1;TRINITY_DN89084_c1_g2_i3;TRINITY_DN89409_c1_g3_i3;TRINITY_DN92298_c1_g5_i1;TRINITY_DN93466_c1_g3_i1	http://amigo.geneontology.org/amigo/term/GO:0010073	BP	10
GO:0060918	auxin transport	11/740	275/21795	0.33266	0.775556	TRINITY_DN73594_c1_g1_i2;TRINITY_DN77590_c0_g5_i1;TRINITY_DN77590_c0_g8_i1;TRINITY_DN79488_c1_g6_i1;TRINITY_DN85778_c2_g7_i1;TRINITY_DN90446_c3_g2_i3;TRINITY_DN90446_c3_g4_i1;TRINITY_DN92713_c1_g5_i1;TRINITY_DN94747_c1_g1_i2;TRINITY_DN94747_c1_g4_i2;TRINITY_DN96704_c2_g1_i1	http://amigo.geneontology.org/amigo/term/GO:0060918	BP	11
GO:0010026	trichome differentiation	8/740	193/21795	0.33351	0.775556	TRINITY_DN69993_c2_g2_i1;TRINITY_DN70539_c0_g1_i1;TRINITY_DN78072_c0_g2_i20;TRINITY_DN84017_c0_g8_i1;TRINITY_DN85716_c0_g1_i22;TRINITY_DN86643_c1_g4_i3;TRINITY_DN88816_c3_g1_i1;TRINITY_DN95457_c5_g4_i1	http://amigo.geneontology.org/amigo/term/GO:0010026	BP	8
GO:0009826	unidimensional cell growth	16/740	414/21795	0.333639	0.775556	TRINITY_DN68815_c0_g1_i1;TRINITY_DN68971_c0_g1_i1;TRINITY_DN69048_c0_g1_i1;TRINITY_DN70602_c0_g1_i1;TRINITY_DN70602_c0_g2_i1;TRINITY_DN73033_c0_g3_i1;TRINITY_DN75500_c1_g1_i1;TRINITY_DN77419_c0_g1_i10;TRINITY_DN80331_c0_g6_i1;TRINITY_DN80415_c4_g1_i1;TRINITY_DN81327_c0_g2_i2;TRINITY_DN83949_c1_g2_i2;TRINITY_DN84017_c0_g8_i1;TRINITY_DN87382_c0_g1_i2;TRINITY_DN89459_c0_g1_i5;TRINITY_DN90636_c0_g1_i7	http://amigo.geneontology.org/amigo/term/GO:0009826	BP	16
GO:0071365	cellular response to auxin stimulus	12/740	303/21795	0.334289	0.775556	TRINITY_DN15130_c1_g1_i1;TRINITY_DN70602_c0_g1_i1;TRINITY_DN70602_c0_g2_i1;TRINITY_DN74399_c0_g2_i2;TRINITY_DN79601_c8_g1_i4;TRINITY_DN85778_c2_g7_i1;TRINITY_DN86907_c3_g4_i3;TRINITY_DN88884_c0_g1_i1;TRINITY_DN89850_c5_g1_i3;TRINITY_DN90446_c3_g2_i3;TRINITY_DN90446_c3_g4_i1;TRINITY_DN92713_c1_g5_i1	http://amigo.geneontology.org/amigo/term/GO:0071365	BP	12
GO:0015851	nucleobase transport	2/740	35/21795	0.334359	0.775556	TRINITY_DN58320_c0_g2_i1;TRINITY_DN66246_c0_g1_i1	http://amigo.geneontology.org/amigo/term/GO:0015851	BP	2
GO:0009685	gibberellin metabolic process	2/740	35/21795	0.334359	0.775556	TRINITY_DN71536_c0_g1_i2;TRINITY_DN71536_c0_g2_i4	http://amigo.geneontology.org/amigo/term/GO:0009685	BP	2
GO:0016101	diterpenoid metabolic process	2/740	35/21795	0.334359	0.775556	TRINITY_DN71536_c0_g1_i2;TRINITY_DN71536_c0_g2_i4	http://amigo.geneontology.org/amigo/term/GO:0016101	BP	2
GO:0007264	small GTPase mediated signal transduction	2/740	35/21795	0.334359	0.775556	TRINITY_DN75000_c0_g2_i3;TRINITY_DN218260_c0_g1_i1	http://amigo.geneontology.org/amigo/term/GO:0007264	BP	2
GO:0015802	basic amino acid transport	2/740	35/21795	0.334359	0.775556	TRINITY_DN70887_c0_g1_i2;TRINITY_DN90456_c1_g1_i1	http://amigo.geneontology.org/amigo/term/GO:0015802	BP	2
GO:0033044	regulation of chromosome organization	4/740	86/21795	0.33445	0.775556	TRINITY_DN66001_c0_g1_i2;TRINITY_DN79180_c4_g2_i1;TRINITY_DN80224_c0_g2_i1;TRINITY_DN90636_c0_g1_i7	http://amigo.geneontology.org/amigo/term/GO:0033044	BP	4
GO:0034220	ion transmembrane transport	41/740	1124/21795	0.339069	0.775556	TRINITY_DN67293_c0_g1_i2;TRINITY_DN67443_c0_g1_i2;TRINITY_DN70525_c3_g2_i1;TRINITY_DN70887_c0_g1_i2;TRINITY_DN71157_c0_g3_i1;TRINITY_DN73821_c5_g2_i1;TRINITY_DN74250_c0_g1_i1;TRINITY_DN74807_c2_g1_i3;TRINITY_DN76473_c8_g1_i2;TRINITY_DN76628_c0_g1_i1;TRINITY_DN79326_c0_g1_i1;TRINITY_DN79540_c0_g3_i4;TRINITY_DN80116_c1_g2_i8;TRINITY_DN80886_c0_g5_i2;TRINITY_DN81530_c0_g1_i6;TRINITY_DN81637_c4_g2_i1…	http://amigo.geneontology.org/amigo/term/GO:0034220	BP	41
GO:0009790	embryo development	49/740	1353/21795	0.339158	0.775556	TRINITY_DN63938_c0_g1_i1;TRINITY_DN68775_c1_g1_i1;TRINITY_DN70135_c0_g2_i3;TRINITY_DN71200_c0_g1_i3;TRINITY_DN71772_c1_g1_i1;TRINITY_DN73326_c0_g1_i1;TRINITY_DN73326_c0_g3_i3;TRINITY_DN73883_c1_g1_i1;TRINITY_DN73973_c3_g2_i1;TRINITY_DN74175_c1_g3_i2;TRINITY_DN75645_c0_g3_i1;TRINITY_DN76437_c5_g2_i1;TRINITY_DN77139_c0_g2_i1;TRINITY_DN77139_c0_g3_i1;TRINITY_DN77419_c0_g1_i10;TRINITY_DN78441_c2_g1_i…	http://amigo.geneontology.org/amigo/term/GO:0009790	BP	49
GO:0002679	respiratory burst involved in defense response	1/740	12/21795	0.339407	0.775556	TRINITY_DN81627_c2_g1_i12	http://amigo.geneontology.org/amigo/term/GO:0002679	BP	1
GO:0019566	arabinose metabolic process	1/740	12/21795	0.339407	0.775556	TRINITY_DN70951_c0_g1_i9	http://amigo.geneontology.org/amigo/term/GO:0019566	BP	1
GO:2000757	negative regulation of peptidyl-lysine acetylation	1/740	12/21795	0.339407	0.775556	TRINITY_DN66001_c0_g1_i2	http://amigo.geneontology.org/amigo/term/GO:2000757	BP	1
GO:0009413	response to flooding	1/740	12/21795	0.339407	0.775556	TRINITY_DN91657_c1_g7_i1	http://amigo.geneontology.org/amigo/term/GO:0009413	BP	1
GO:0045730	respiratory burst	1/740	12/21795	0.339407	0.775556	TRINITY_DN81627_c2_g1_i12	http://amigo.geneontology.org/amigo/term/GO:0045730	BP	1
GO:0006901	vesicle coating	1/740	12/21795	0.339407	0.775556	TRINITY_DN73631_c1_g2_i1	http://amigo.geneontology.org/amigo/term/GO:0006901	BP	1
GO:0033273	response to vitamin	1/740	12/21795	0.339407	0.775556	TRINITY_DN75152_c3_g2_i1	http://amigo.geneontology.org/amigo/term/GO:0033273	BP	1
GO:0000080	mitotic G1 phase	1/740	12/21795	0.339407	0.775556	TRINITY_DN86288_c3_g4_i1	http://amigo.geneontology.org/amigo/term/GO:0000080	BP	1
GO:0035067	negative regulation of histone acetylation	1/740	12/21795	0.339407	0.775556	TRINITY_DN66001_c0_g1_i2	http://amigo.geneontology.org/amigo/term/GO:0035067	BP	1
GO:0050708	regulation of protein secretion	1/740	12/21795	0.339407	0.775556	TRINITY_DN75000_c0_g2_i3	http://amigo.geneontology.org/amigo/term/GO:0050708	BP	1
GO:0006423	cysteinyl-tRNA aminoacylation	1/740	12/21795	0.339407	0.775556	TRINITY_DN80655_c2_g4_i2	http://amigo.geneontology.org/amigo/term/GO:0006423	BP	1
GO:0048754	branching morphogenesis of an epithelial tube	1/740	12/21795	0.339407	0.775556	TRINITY_DN69073_c2_g1_i1	http://amigo.geneontology.org/amigo/term/GO:0048754	BP	1
GO:0009051	pentose-phosphate shunt, oxidative branch	1/740	12/21795	0.339407	0.775556	TRINITY_DN72895_c3_g2_i4	http://amigo.geneontology.org/amigo/term/GO:0009051	BP	1
GO:1901984	negative regulation of protein acetylation	1/740	12/21795	0.339407	0.775556	TRINITY_DN66001_c0_g1_i2	http://amigo.geneontology.org/amigo/term/GO:1901984	BP	1
GO:0010232	vascular transport	1/740	12/21795	0.339407	0.775556	TRINITY_DN74399_c0_g2_i2	http://amigo.geneontology.org/amigo/term/GO:0010232	BP	1
GO:0010233	phloem transport	1/740	12/21795	0.339407	0.775556	TRINITY_DN74399_c0_g2_i2	http://amigo.geneontology.org/amigo/term/GO:0010233	BP	1
GO:0061138	morphogenesis of a branching epithelium	1/740	12/21795	0.339407	0.775556	TRINITY_DN69073_c2_g1_i1	http://amigo.geneontology.org/amigo/term/GO:0061138	BP	1
GO:0043044	ATP-dependent chromatin remodeling	1/740	12/21795	0.339407	0.775556	TRINITY_DN80567_c0_g6_i1	http://amigo.geneontology.org/amigo/term/GO:0043044	BP	1
GO:0055085	transmembrane transport	68/740	1900/21795	0.340664	0.777813	TRINITY_DN58320_c0_g2_i1;TRINITY_DN66246_c0_g1_i1;TRINITY_DN67293_c0_g1_i2;TRINITY_DN67443_c0_g1_i2;TRINITY_DN68107_c0_g1_i1;TRINITY_DN69901_c0_g2_i2;TRINITY_DN70458_c1_g1_i2;TRINITY_DN70525_c3_g2_i1;TRINITY_DN70640_c1_g1_i2;TRINITY_DN70887_c0_g1_i2;TRINITY_DN71157_c0_g3_i1;TRINITY_DN71954_c3_g8_i3;TRINITY_DN72714_c0_g2_i1;TRINITY_DN73821_c5_g2_i1;TRINITY_DN74250_c0_g1_i1;TRINITY_DN74807_c2_g1_i3…	http://amigo.geneontology.org/amigo/term/GO:0055085	BP	68
GO:0051053	negative regulation of DNA metabolic process	4/740	87/21795	0.342199	0.778854	TRINITY_DN76437_c5_g2_i1;TRINITY_DN77139_c0_g2_i1;TRINITY_DN77139_c0_g3_i1;TRINITY_DN88013_c3_g8_i1	http://amigo.geneontology.org/amigo/term/GO:0051053	BP	4
GO:0048236	plant-type sporogenesis	3/740	61/21795	0.342888	0.779807	TRINITY_DN73585_c1_g5_i1;TRINITY_DN86620_c1_g4_i2;TRINITY_DN86620_c1_g3_i5	http://amigo.geneontology.org/amigo/term/GO:0048236	BP	3
GO:0009798	axis specification	5/740	114/21795	0.345358	0.783848	TRINITY_DN67876_c0_g1_i2;TRINITY_DN71772_c1_g1_i1;TRINITY_DN81011_c0_g2_i4;TRINITY_DN89966_c3_g2_i2;TRINITY_DN92040_c0_g1_i11	http://amigo.geneontology.org/amigo/term/GO:0009798	BP	5
GO:0045088	regulation of innate immune response	5/740	114/21795	0.345358	0.783848	TRINITY_DN77283_c0_g1_i4;TRINITY_DN77283_c0_g5_i1;TRINITY_DN80224_c0_g2_i1;TRINITY_DN86288_c3_g4_i1;TRINITY_DN94882_c0_g4_i1	http://amigo.geneontology.org/amigo/term/GO:0045088	BP	5
GO:0006570	tyrosine metabolic process	2/740	36/21795	0.346838	0.783848	TRINITY_DN72971_c0_g1_i3;TRINITY_DN82036_c3_g1_i3	http://amigo.geneontology.org/amigo/term/GO:0006570	BP	2
GO:0006625	protein targeting to peroxisome	2/740	36/21795	0.346838	0.783848	TRINITY_DN89072_c0_g1_i1;TRINITY_DN92311_c0_g4_i4	http://amigo.geneontology.org/amigo/term/GO:0006625	BP	2
GO:0043434	response to peptide hormone	2/740	36/21795	0.346838	0.783848	TRINITY_DN81698_c0_g3_i1;TRINITY_DN114980_c0_g1_i1	http://amigo.geneontology.org/amigo/term/GO:0043434	BP	2
GO:0072663	establishment of protein localization to peroxisome	2/740	36/21795	0.346838	0.783848	TRINITY_DN89072_c0_g1_i1;TRINITY_DN92311_c0_g4_i4	http://amigo.geneontology.org/amigo/term/GO:0072663	BP	2
GO:1901652	response to peptide	2/740	36/21795	0.346838	0.783848	TRINITY_DN81698_c0_g3_i1;TRINITY_DN114980_c0_g1_i1	http://amigo.geneontology.org/amigo/term/GO:1901652	BP	2
GO:0009914	hormone transport	11/740	279/21795	0.349715	0.786148	TRINITY_DN73594_c1_g1_i2;TRINITY_DN77590_c0_g5_i1;TRINITY_DN77590_c0_g8_i1;TRINITY_DN79488_c1_g6_i1;TRINITY_DN85778_c2_g7_i1;TRINITY_DN90446_c3_g2_i3;TRINITY_DN90446_c3_g4_i1;TRINITY_DN92713_c1_g5_i1;TRINITY_DN94747_c1_g1_i2;TRINITY_DN94747_c1_g4_i2;TRINITY_DN96704_c2_g1_i1	http://amigo.geneontology.org/amigo/term/GO:0009914	BP	11
GO:0034050	host programmed cell death induced by symbiont	4/740	88/21795	0.349953	0.786148	TRINITY_DN50025_c0_g1_i1;TRINITY_DN75702_c2_g1_i1;TRINITY_DN84755_c2_g5_i3;TRINITY_DN86284_c4_g7_i1	http://amigo.geneontology.org/amigo/term/GO:0034050	BP	4
GO:0034765	regulation of ion transmembrane transport	4/740	88/21795	0.349953	0.786148	TRINITY_DN74828_c0_g1_i1;TRINITY_DN77570_c2_g2_i2;TRINITY_DN80442_c2_g1_i2;TRINITY_DN84843_c0_g1_i5	http://amigo.geneontology.org/amigo/term/GO:0034765	BP	4
GO:0009605	response to external stimulus	34/740	929/21795	0.350035	0.786148	TRINITY_DN43850_c0_g1_i1;TRINITY_DN50025_c0_g1_i1;TRINITY_DN70525_c3_g2_i1;TRINITY_DN71723_c2_g1_i1;TRINITY_DN72144_c3_g1_i1;TRINITY_DN72450_c1_g5_i2;TRINITY_DN72908_c0_g1_i9;TRINITY_DN73152_c1_g3_i1;TRINITY_DN74828_c0_g1_i1;TRINITY_DN75152_c3_g2_i1;TRINITY_DN75702_c2_g1_i1;TRINITY_DN77891_c0_g1_i1;TRINITY_DN77891_c1_g1_i5;TRINITY_DN81011_c0_g2_i4;TRINITY_DN82498_c1_g1_i6;TRINITY_DN82697_c2_g3_i1…	http://amigo.geneontology.org/amigo/term/GO:0009605	BP	34
GO:0016043	cellular component organization	109/740	3093/21795	0.350626	0.786863	TRINITY_DN48212_c0_g1_i1;TRINITY_DN63938_c0_g1_i1;TRINITY_DN65799_c0_g1_i3;TRINITY_DN66170_c0_g1_i1;TRINITY_DN68815_c0_g1_i1;TRINITY_DN68971_c0_g1_i1;TRINITY_DN69022_c0_g1_i1;TRINITY_DN69048_c0_g1_i1;TRINITY_DN69362_c0_g1_i2;TRINITY_DN69993_c2_g2_i1;TRINITY_DN70539_c0_g1_i1;TRINITY_DN70602_c0_g1_i1;TRINITY_DN70602_c0_g2_i1;TRINITY_DN71200_c0_g1_i3;TRINITY_DN71317_c1_g1_i3;TRINITY_DN71954_c3_g8_i3…	http://amigo.geneontology.org/amigo/term/GO:0016043	BP	109
GO:0009640	photomorphogenesis	5/740	115/21795	0.352113	0.786958	TRINITY_DN70433_c0_g1_i3;TRINITY_DN70433_c0_g6_i1;TRINITY_DN81698_c0_g3_i1;TRINITY_DN87364_c0_g3_i1;TRINITY_DN114980_c0_g1_i1	http://amigo.geneontology.org/amigo/term/GO:0009640	BP	5
GO:0051510	regulation of unidimensional cell growth	4/740	89/21795	0.357708	0.786958	TRINITY_DN69048_c0_g1_i1;TRINITY_DN74039_c0_g2_i1;TRINITY_DN77570_c2_g2_i2;TRINITY_DN87382_c0_g1_i2	http://amigo.geneontology.org/amigo/term/GO:0051510	BP	4
GO:0043574	peroxisomal transport	2/740	37/21795	0.359237	0.786958	TRINITY_DN89072_c0_g1_i1;TRINITY_DN92311_c0_g4_i4	http://amigo.geneontology.org/amigo/term/GO:0043574	BP	2
GO:0009690	cytokinin metabolic process	2/740	37/21795	0.359237	0.786958	TRINITY_DN78565_c0_g1_i1;TRINITY_DN87701_c0_g5_i2	http://amigo.geneontology.org/amigo/term/GO:0009690	BP	2
GO:0042593	glucose homeostasis	2/740	37/21795	0.359237	0.786958	TRINITY_DN66576_c0_g1_i2;TRINITY_DN85344_c1_g3_i2	http://amigo.geneontology.org/amigo/term/GO:0042593	BP	2
GO:0055070	copper ion homeostasis	2/740	37/21795	0.359237	0.786958	TRINITY_DN74269_c0_g3_i1;TRINITY_DN74269_c0_g1_i10	http://amigo.geneontology.org/amigo/term/GO:0055070	BP	2
GO:0032787	monocarboxylic acid metabolic process	34/740	933/21795	0.359493	0.786958	TRINITY_DN63938_c0_g1_i1;TRINITY_DN64333_c0_g1_i2;TRINITY_DN65523_c0_g1_i1;TRINITY_DN67629_c0_g1_i1;TRINITY_DN69553_c0_g1_i1;TRINITY_DN70511_c0_g2_i2;TRINITY_DN71012_c0_g1_i1;TRINITY_DN71562_c3_g1_i1;TRINITY_DN72083_c0_g1_i4;TRINITY_DN72627_c2_g1_i3;TRINITY_DN73326_c0_g1_i1;TRINITY_DN73326_c0_g3_i3;TRINITY_DN78068_c2_g3_i2;TRINITY_DN78503_c0_g1_i2;TRINITY_DN79447_c3_g1_i1;TRINITY_DN79971_c0_g2_i4…	http://amigo.geneontology.org/amigo/term/GO:0032787	BP	34
GO:0006631	fatty acid metabolic process	20/740	535/21795	0.361451	0.786958	TRINITY_DN63938_c0_g1_i1;TRINITY_DN67629_c0_g1_i1;TRINITY_DN69553_c0_g1_i1;TRINITY_DN70511_c0_g2_i2;TRINITY_DN71012_c0_g1_i1;TRINITY_DN71562_c3_g1_i1;TRINITY_DN72083_c0_g1_i4;TRINITY_DN73326_c0_g1_i1;TRINITY_DN73326_c0_g3_i3;TRINITY_DN79447_c3_g1_i1;TRINITY_DN79971_c0_g2_i4;TRINITY_DN82128_c1_g2_i2;TRINITY_DN88823_c0_g3_i1;TRINITY_DN91192_c0_g11_i1;TRINITY_DN91427_c7_g2_i3;TRINITY_DN91524_c0_g3_i…	http://amigo.geneontology.org/amigo/term/GO:0006631	BP	20
GO:0046164	alcohol catabolic process	3/740	63/21795	0.361563	0.786958	TRINITY_DN75732_c1_g1_i6;TRINITY_DN84005_c0_g1_i6;TRINITY_DN95812_c1_g1_i9	http://amigo.geneontology.org/amigo/term/GO:0046164	BP	3
GO:0075733	intracellular transport of virus	1/740	13/21795	0.361848	0.786958	TRINITY_DN86288_c3_g4_i1	http://amigo.geneontology.org/amigo/term/GO:0075733	BP	1
GO:0015853	adenine transport	1/740	13/21795	0.361848	0.786958	TRINITY_DN58320_c0_g2_i1	http://amigo.geneontology.org/amigo/term/GO:0015853	BP	1
GO:0007219	Notch signaling pathway	1/740	13/21795	0.361848	0.786958	TRINITY_DN86288_c3_g4_i1	http://amigo.geneontology.org/amigo/term/GO:0007219	BP	1
GO:0033609	oxalate metabolic process	1/740	13/21795	0.361848	0.786958	TRINITY_DN79447_c3_g1_i1	http://amigo.geneontology.org/amigo/term/GO:0033609	BP	1
GO:0033611	oxalate catabolic process	1/740	13/21795	0.361848	0.786958	TRINITY_DN79447_c3_g1_i1	http://amigo.geneontology.org/amigo/term/GO:0033611	BP	1
GO:0051983	regulation of chromosome segregation	1/740	13/21795	0.361848	0.786958	TRINITY_DN90636_c0_g1_i7	http://amigo.geneontology.org/amigo/term/GO:0051983	BP	1
GO:0048011	neurotrophin TRK receptor signaling pathway	1/740	13/21795	0.361848	0.786958	TRINITY_DN86288_c3_g4_i1	http://amigo.geneontology.org/amigo/term/GO:0048011	BP	1
GO:0030239	myofibril assembly	1/740	13/21795	0.361848	0.786958	TRINITY_DN94190_c2_g1_i20	http://amigo.geneontology.org/amigo/term/GO:0030239	BP	1
GO:0009697	salicylic acid biosynthetic process	1/740	13/21795	0.361848	0.786958	TRINITY_DN78503_c0_g1_i2	http://amigo.geneontology.org/amigo/term/GO:0009697	BP	1
GO:0006691	leukotriene metabolic process	1/740	13/21795	0.361848	0.786958	TRINITY_DN91427_c7_g2_i3	http://amigo.geneontology.org/amigo/term/GO:0006691	BP	1
GO:0032210	regulation of telomere maintenance via telomerase	1/740	13/21795	0.361848	0.786958	TRINITY_DN79180_c4_g2_i1	http://amigo.geneontology.org/amigo/term/GO:0032210	BP	1
GO:0046456	icosanoid biosynthetic process	1/740	13/21795	0.361848	0.786958	TRINITY_DN91427_c7_g2_i3	http://amigo.geneontology.org/amigo/term/GO:0046456	BP	1
GO:0031154	culmination involved in sorocarp development	1/740	13/21795	0.361848	0.786958	TRINITY_DN43850_c0_g1_i1	http://amigo.geneontology.org/amigo/term/GO:0031154	BP	1
GO:0043009	chordate embryonic development	1/740	13/21795	0.361848	0.786958	TRINITY_DN94190_c2_g1_i20	http://amigo.geneontology.org/amigo/term/GO:0043009	BP	1
GO:0045835	negative regulation of meiotic nuclear division	1/740	13/21795	0.361848	0.786958	TRINITY_DN71239_c1_g1_i7	http://amigo.geneontology.org/amigo/term/GO:0045835	BP	1
GO:0071276	cellular response to cadmium ion	1/740	13/21795	0.361848	0.786958	TRINITY_DN79447_c3_g1_i1	http://amigo.geneontology.org/amigo/term/GO:0071276	BP	1
GO:0038179	neurotrophin signaling pathway	1/740	13/21795	0.361848	0.786958	TRINITY_DN86288_c3_g4_i1	http://amigo.geneontology.org/amigo/term/GO:0038179	BP	1
GO:0002532	production of molecular mediator involved in inflammatory response	1/740	13/21795	0.361848	0.786958	TRINITY_DN91427_c7_g2_i3	http://amigo.geneontology.org/amigo/term/GO:0002532	BP	1
GO:0006661	phosphatidylinositol biosynthetic process	1/740	13/21795	0.361848	0.786958	TRINITY_DN83157_c6_g4_i1	http://amigo.geneontology.org/amigo/term/GO:0006661	BP	1
GO:0019370	leukotriene biosynthetic process	1/740	13/21795	0.361848	0.786958	TRINITY_DN91427_c7_g2_i3	http://amigo.geneontology.org/amigo/term/GO:0019370	BP	1
GO:0030193	regulation of blood coagulation	1/740	13/21795	0.361848	0.786958	TRINITY_DN94190_c2_g1_i20	http://amigo.geneontology.org/amigo/term/GO:0030193	BP	1
GO:0048438	floral whorl development	14/740	366/21795	0.362531	0.78785	TRINITY_DN67047_c0_g1_i1;TRINITY_DN67350_c0_g1_i1;TRINITY_DN71355_c0_g1_i1;TRINITY_DN72627_c2_g1_i3;TRINITY_DN72765_c0_g1_i1;TRINITY_DN76233_c0_g1_i1;TRINITY_DN81281_c4_g1_i1;TRINITY_DN82731_c0_g4_i2;TRINITY_DN83499_c1_g7_i1;TRINITY_DN83523_c1_g2_i2;TRINITY_DN89084_c1_g2_i3;TRINITY_DN89409_c1_g3_i3;TRINITY_DN89850_c5_g1_i3;TRINITY_DN90042_c0_g4_i2	http://amigo.geneontology.org/amigo/term/GO:0048438	BP	14
GO:0050776	regulation of immune response	6/740	144/21795	0.364162	0.788385	TRINITY_DN77283_c0_g1_i4;TRINITY_DN77283_c0_g5_i1;TRINITY_DN80224_c0_g2_i1;TRINITY_DN86288_c3_g4_i1;TRINITY_DN94190_c2_g1_i20;TRINITY_DN94882_c0_g4_i1	http://amigo.geneontology.org/amigo/term/GO:0050776	BP	6
GO:0046688	response to copper ion	4/740	90/21795	0.365461	0.789462	TRINITY_DN84753_c0_g1_i4;TRINITY_DN91428_c1_g5_i1;TRINITY_DN95271_c1_g2_i4;TRINITY_DN95518_c1_g1_i6	http://amigo.geneontology.org/amigo/term/GO:0046688	BP	4
GO:0032880	regulation of protein localization	3/740	64/21795	0.370872	0.79665	TRINITY_DN69811_c0_g2_i1;TRINITY_DN75000_c0_g2_i3;TRINITY_DN80224_c0_g2_i1	http://amigo.geneontology.org/amigo/term/GO:0032880	BP	3
GO:0009704	de-etiolation	2/740	38/21795	0.371549	0.79665	TRINITY_DN81698_c0_g3_i1;TRINITY_DN114980_c0_g1_i1	http://amigo.geneontology.org/amigo/term/GO:0009704	BP	2
GO:0032147	activation of protein kinase activity	2/740	38/21795	0.371549	0.79665	TRINITY_DN73594_c1_g1_i2;TRINITY_DN86288_c3_g4_i1	http://amigo.geneontology.org/amigo/term/GO:0032147	BP	2
GO:0032200	telomere organization	2/740	38/21795	0.371549	0.79665	TRINITY_DN79180_c4_g2_i1;TRINITY_DN80593_c0_g6_i1	http://amigo.geneontology.org/amigo/term/GO:0032200	BP	2
GO:0071281	cellular response to iron ion	2/740	38/21795	0.371549	0.79665	TRINITY_DN78565_c0_g1_i1;TRINITY_DN86711_c0_g1_i2	http://amigo.geneontology.org/amigo/term/GO:0071281	BP	2
GO:0055075	potassium ion homeostasis	2/740	38/21795	0.371549	0.79665	TRINITY_DN78762_c0_g4_i13;TRINITY_DN87035_c0_g1_i6	http://amigo.geneontology.org/amigo/term/GO:0055075	BP	2
GO:0030435	sporulation resulting in formation of a cellular spore	2/740	38/21795	0.371549	0.79665	TRINITY_DN43850_c0_g1_i1;TRINITY_DN75000_c0_g2_i3	http://amigo.geneontology.org/amigo/term/GO:0030435	BP	2
GO:0000723	telomere maintenance	2/740	38/21795	0.371549	0.79665	TRINITY_DN79180_c4_g2_i1;TRINITY_DN80593_c0_g6_i1	http://amigo.geneontology.org/amigo/term/GO:0000723	BP	2
GO:0048653	anther development	5/740	118/21795	0.372405	0.797893	TRINITY_DN67350_c0_g1_i1;TRINITY_DN71355_c0_g1_i1;TRINITY_DN72627_c2_g1_i3;TRINITY_DN83499_c1_g7_i1;TRINITY_DN89084_c1_g2_i3	http://amigo.geneontology.org/amigo/term/GO:0048653	BP	5
GO:0009651	response to salt stress	44/740	1228/21795	0.37703	0.802439	TRINITY_DN67891_c0_g1_i1;TRINITY_DN69022_c0_g1_i1;TRINITY_DN70380_c0_g5_i1;TRINITY_DN70871_c0_g1_i1;TRINITY_DN71532_c0_g1_i1;TRINITY_DN73594_c1_g1_i2;TRINITY_DN73577_c5_g1_i1;TRINITY_DN73998_c2_g4_i4;TRINITY_DN75177_c2_g3_i2;TRINITY_DN75896_c2_g1_i2;TRINITY_DN75913_c2_g1_i8;TRINITY_DN77570_c2_g2_i2;TRINITY_DN77953_c1_g1_i1;TRINITY_DN78503_c0_g1_i2;TRINITY_DN78565_c0_g1_i1;TRINITY_DN78742_c2_g2_i1…	http://amigo.geneontology.org/amigo/term/GO:0009651	BP	44
GO:0044070	regulation of anion transport	3/740	65/21795	0.380155	0.808495	TRINITY_DN74828_c0_g1_i1;TRINITY_DN77570_c2_g2_i2;TRINITY_DN80442_c2_g1_i2	http://amigo.geneontology.org/amigo/term/GO:0044070	BP	3
GO:0043408	regulation of MAPK cascade	4/740	92/21795	0.380951	0.808996	TRINITY_DN71557_c0_g1_i11;TRINITY_DN73594_c1_g1_i2;TRINITY_DN75913_c2_g1_i8;TRINITY_DN86288_c3_g4_i1	http://amigo.geneontology.org/amigo/term/GO:0043408	BP	4
GO:0031400	negative regulation of protein modification process	4/740	92/21795	0.380951	0.808996	TRINITY_DN66001_c0_g1_i2;TRINITY_DN71557_c0_g1_i11;TRINITY_DN75913_c2_g1_i8;TRINITY_DN86288_c3_g4_i1	http://amigo.geneontology.org/amigo/term/GO:0031400	BP	4
GO:0009901	anther dehiscence	1/740	14/21795	0.383528	0.809609	TRINITY_DN83499_c1_g7_i1	http://amigo.geneontology.org/amigo/term/GO:0009901	BP	1
GO:0009823	cytokinin catabolic process	1/740	14/21795	0.383528	0.809609	TRINITY_DN87701_c0_g5_i2	http://amigo.geneontology.org/amigo/term/GO:0009823	BP	1
GO:0006513	protein monoubiquitination	1/740	14/21795	0.383528	0.809609	TRINITY_DN80224_c0_g2_i1	http://amigo.geneontology.org/amigo/term/GO:0006513	BP	1
GO:0010215	cellulose microfibril organization	1/740	14/21795	0.383528	0.809609	TRINITY_DN92693_c1_g2_i3	http://amigo.geneontology.org/amigo/term/GO:0010215	BP	1
GO:0008584	male gonad development	1/740	14/21795	0.383528	0.809609	TRINITY_DN86288_c3_g4_i1	http://amigo.geneontology.org/amigo/term/GO:0008584	BP	1
GO:0042447	hormone catabolic process	1/740	14/21795	0.383528	0.809609	TRINITY_DN87701_c0_g5_i2	http://amigo.geneontology.org/amigo/term/GO:0042447	BP	1
GO:0007097	nuclear migration	1/740	14/21795	0.383528	0.809609	TRINITY_DN71772_c1_g1_i1	http://amigo.geneontology.org/amigo/term/GO:0007097	BP	1
GO:0043407	negative regulation of MAP kinase activity	2/740	39/21795	0.383765	0.809609	TRINITY_DN71557_c0_g1_i11;TRINITY_DN75913_c2_g1_i8	http://amigo.geneontology.org/amigo/term/GO:0043407	BP	2
GO:0071577	zinc II ion transmembrane transport	2/740	39/21795	0.383765	0.809609	TRINITY_DN89234_c2_g5_i2;TRINITY_DN90668_c1_g3_i1	http://amigo.geneontology.org/amigo/term/GO:0071577	BP	2
GO:0070588	calcium ion transmembrane transport	7/740	175/21795	0.384098	0.80972	TRINITY_DN80886_c0_g5_i2;TRINITY_DN81530_c0_g1_i6;TRINITY_DN81807_c4_g1_i3;TRINITY_DN88917_c3_g2_i1;TRINITY_DN90136_c5_g5_i2;TRINITY_DN96732_c1_g2_i4;TRINITY_DN96732_c1_g4_i3	http://amigo.geneontology.org/amigo/term/GO:0070588	BP	7
GO:0009073	aromatic amino acid family biosynthetic process	4/740	93/21795	0.388682	0.81728	TRINITY_DN72971_c0_g1_i3;TRINITY_DN81835_c2_g1_i3;TRINITY_DN82036_c3_g1_i3;TRINITY_DN91527_c3_g4_i1	http://amigo.geneontology.org/amigo/term/GO:0009073	BP	4
GO:0044257	cellular protein catabolic process	14/740	373/21795	0.3891	0.81728	TRINITY_DN71772_c1_g1_i1;TRINITY_DN74875_c0_g2_i3;TRINITY_DN76249_c2_g1_i6;TRINITY_DN76437_c5_g2_i1;TRINITY_DN77139_c0_g2_i1;TRINITY_DN77139_c0_g3_i1;TRINITY_DN80224_c0_g2_i1;TRINITY_DN85716_c0_g1_i22;TRINITY_DN86288_c3_g4_i1;TRINITY_DN88013_c3_g8_i1;TRINITY_DN89072_c0_g1_i1;TRINITY_DN90238_c5_g3_i3;TRINITY_DN92311_c0_g4_i4;TRINITY_DN95963_c2_g3_i2	http://amigo.geneontology.org/amigo/term/GO:0044257	BP	14
GO:0007169	transmembrane receptor protein tyrosine kinase signaling pathway	2/740	40/21795	0.395877	0.824184	TRINITY_DN73631_c1_g2_i1;TRINITY_DN86288_c3_g4_i1	http://amigo.geneontology.org/amigo/term/GO:0007169	BP	2
GO:0010107	potassium ion import	2/740	40/21795	0.395877	0.824184	TRINITY_DN82498_c1_g1_i6;TRINITY_DN84843_c0_g1_i5	http://amigo.geneontology.org/amigo/term/GO:0010107	BP	2
GO:0043409	negative regulation of MAPK cascade	2/740	40/21795	0.395877	0.824184	TRINITY_DN71557_c0_g1_i11;TRINITY_DN75913_c2_g1_i8	http://amigo.geneontology.org/amigo/term/GO:0043409	BP	2
GO:0016485	protein processing	2/740	40/21795	0.395877	0.824184	TRINITY_DN89072_c0_g1_i1;TRINITY_DN92311_c0_g4_i4	http://amigo.geneontology.org/amigo/term/GO:0016485	BP	2
GO:0042060	wound healing	2/740	40/21795	0.395877	0.824184	TRINITY_DN88654_c0_g2_i8;TRINITY_DN94190_c2_g1_i20	http://amigo.geneontology.org/amigo/term/GO:0042060	BP	2
GO:0010148	transpiration	2/740	40/21795	0.395877	0.824184	TRINITY_DN70801_c0_g1_i6;TRINITY_DN70801_c0_g2_i1	http://amigo.geneontology.org/amigo/term/GO:0010148	BP	2
GO:0008284	positive regulation of cell proliferation	4/740	94/21795	0.3964	0.824184	TRINITY_DN53892_c1_g1_i1;TRINITY_DN74175_c1_g3_i2;TRINITY_DN83197_c0_g1_i2;TRINITY_DN94190_c2_g1_i20	http://amigo.geneontology.org/amigo/term/GO:0008284	BP	4
GO:0009968	negative regulation of signal transduction	6/740	150/21795	0.40064	0.824184	TRINITY_DN68780_c0_g2_i2;TRINITY_DN71557_c0_g1_i11;TRINITY_DN73631_c1_g2_i1;TRINITY_DN75913_c2_g1_i8;TRINITY_DN78565_c0_g1_i1;TRINITY_DN86288_c3_g4_i1	http://amigo.geneontology.org/amigo/term/GO:0009968	BP	6
GO:0023057	negative regulation of signaling	6/740	150/21795	0.40064	0.824184	TRINITY_DN68780_c0_g2_i2;TRINITY_DN71557_c0_g1_i11;TRINITY_DN73631_c1_g2_i1;TRINITY_DN75913_c2_g1_i8;TRINITY_DN78565_c0_g1_i1;TRINITY_DN86288_c3_g4_i1	http://amigo.geneontology.org/amigo/term/GO:0023057	BP	6
GO:0048468	cell development	28/740	778/21795	0.402726	0.824184	TRINITY_DN67782_c0_g1_i1;TRINITY_DN69993_c2_g2_i1;TRINITY_DN70135_c0_g2_i3;TRINITY_DN70539_c0_g1_i1;TRINITY_DN71392_c0_g1_i7;TRINITY_DN73484_c2_g1_i1;TRINITY_DN75000_c0_g2_i3;TRINITY_DN78072_c0_g2_i20;TRINITY_DN80224_c0_g2_i1;TRINITY_DN80415_c4_g1_i1;TRINITY_DN81280_c0_g1_i1;TRINITY_DN81327_c0_g2_i2;TRINITY_DN82276_c1_g3_i1;TRINITY_DN82530_c2_g2_i2;TRINITY_DN82731_c0_g4_i2;TRINITY_DN83527_c3_g5_i…	http://amigo.geneontology.org/amigo/term/GO:0048468	BP	28
GO:0071900	regulation of protein serine/threonine kinase activity	4/740	95/21795	0.404101	0.824184	TRINITY_DN71557_c0_g1_i11;TRINITY_DN73594_c1_g1_i2;TRINITY_DN75913_c2_g1_i8;TRINITY_DN86288_c3_g4_i1	http://amigo.geneontology.org/amigo/term/GO:0071900	BP	4
GO:0006511	ubiquitin-dependent protein catabolic process	12/740	320/21795	0.40416	0.824184	TRINITY_DN71772_c1_g1_i1;TRINITY_DN74875_c0_g2_i3;TRINITY_DN76249_c2_g1_i6;TRINITY_DN76437_c5_g2_i1;TRINITY_DN77139_c0_g2_i1;TRINITY_DN77139_c0_g3_i1;TRINITY_DN80224_c0_g2_i1;TRINITY_DN85716_c0_g1_i22;TRINITY_DN86288_c3_g4_i1;TRINITY_DN88013_c3_g8_i1;TRINITY_DN90238_c5_g3_i3;TRINITY_DN95963_c2_g3_i2	http://amigo.geneontology.org/amigo/term/GO:0006511	BP	12
GO:0030154	cell differentiation	42/740	1183/21795	0.404434	0.824184	TRINITY_DN43850_c0_g1_i1;TRINITY_DN47904_c0_g1_i1;TRINITY_DN67350_c0_g1_i1;TRINITY_DN67782_c0_g1_i1;TRINITY_DN69993_c2_g2_i1;TRINITY_DN70135_c0_g2_i3;TRINITY_DN70539_c0_g1_i1;TRINITY_DN71355_c0_g1_i1;TRINITY_DN71392_c0_g1_i7;TRINITY_DN71772_c1_g1_i1;TRINITY_DN73484_c2_g1_i1;TRINITY_DN75000_c0_g2_i3;TRINITY_DN75152_c3_g2_i1;TRINITY_DN78072_c0_g2_i20;TRINITY_DN80224_c0_g2_i1;TRINITY_DN80415_c4_g1_i…	http://amigo.geneontology.org/amigo/term/GO:0030154	BP	42
GO:0008354	germ cell migration	1/740	15/21795	0.404472	0.824184	TRINITY_DN71772_c1_g1_i1	http://amigo.geneontology.org/amigo/term/GO:0008354	BP	1
GO:0046660	female sex differentiation	1/740	15/21795	0.404472	0.824184	TRINITY_DN86288_c3_g4_i1	http://amigo.geneontology.org/amigo/term/GO:0046660	BP	1
GO:0010105	negative regulation of ethylene-activated signaling pathway	1/740	15/21795	0.404472	0.824184	TRINITY_DN78565_c0_g1_i1	http://amigo.geneontology.org/amigo/term/GO:0010105	BP	1
GO:0015717	triose phosphate transport	1/740	15/21795	0.404472	0.824184	TRINITY_DN91981_c0_g3_i2	http://amigo.geneontology.org/amigo/term/GO:0015717	BP	1
GO:0045003	double-strand break repair via synthesis-dependent strand annealing	1/740	15/21795	0.404472	0.824184	TRINITY_DN95884_c0_g1_i1	http://amigo.geneontology.org/amigo/term/GO:0045003	BP	1
GO:0070298	negative regulation of phosphorelay signal transduction system	1/740	15/21795	0.404472	0.824184	TRINITY_DN78565_c0_g1_i1	http://amigo.geneontology.org/amigo/term/GO:0070298	BP	1
GO:0019253	reductive pentose-phosphate cycle	1/740	15/21795	0.404472	0.824184	TRINITY_DN70263_c0_g1_i2	http://amigo.geneontology.org/amigo/term/GO:0019253	BP	1
GO:0007035	vacuolar acidification	1/740	15/21795	0.404472	0.824184	TRINITY_DN83913_c3_g5_i1	http://amigo.geneontology.org/amigo/term/GO:0007035	BP	1
GO:0007254	JNK cascade	1/740	15/21795	0.404472	0.824184	TRINITY_DN86288_c3_g4_i1	http://amigo.geneontology.org/amigo/term/GO:0007254	BP	1
GO:0035065	regulation of histone acetylation	1/740	15/21795	0.404472	0.824184	TRINITY_DN66001_c0_g1_i2	http://amigo.geneontology.org/amigo/term/GO:0035065	BP	1
GO:0010262	somatic embryogenesis	1/740	15/21795	0.404472	0.824184	TRINITY_DN73883_c1_g1_i1	http://amigo.geneontology.org/amigo/term/GO:0010262	BP	1
GO:0030900	forebrain development	1/740	15/21795	0.404472	0.824184	TRINITY_DN86288_c3_g4_i1	http://amigo.geneontology.org/amigo/term/GO:0030900	BP	1
GO:0035436	triose phosphate transmembrane transport	1/740	15/21795	0.404472	0.824184	TRINITY_DN91981_c0_g3_i2	http://amigo.geneontology.org/amigo/term/GO:0035436	BP	1
GO:0046545	development of primary female sexual characteristics	1/740	15/21795	0.404472	0.824184	TRINITY_DN86288_c3_g4_i1	http://amigo.geneontology.org/amigo/term/GO:0046545	BP	1
GO:0006893	Golgi to plasma membrane transport	1/740	15/21795	0.404472	0.824184	TRINITY_DN75000_c0_g2_i3	http://amigo.geneontology.org/amigo/term/GO:0006893	BP	1
GO:0032107	regulation of response to nutrient levels	1/740	15/21795	0.404472	0.824184	TRINITY_DN75000_c0_g2_i3	http://amigo.geneontology.org/amigo/term/GO:0032107	BP	1
GO:0031062	positive regulation of histone methylation	1/740	15/21795	0.404472	0.824184	TRINITY_DN66001_c0_g1_i2	http://amigo.geneontology.org/amigo/term/GO:0031062	BP	1
GO:0010582	floral meristem determinacy	1/740	15/21795	0.404472	0.824184	TRINITY_DN71392_c0_g1_i7	http://amigo.geneontology.org/amigo/term/GO:0010582	BP	1
GO:0019685	photosynthesis, dark reaction	1/740	15/21795	0.404472	0.824184	TRINITY_DN70263_c0_g1_i2	http://amigo.geneontology.org/amigo/term/GO:0019685	BP	1
GO:0071705	nitrogen compound transport	20/740	549/21795	0.405581	0.825462	TRINITY_DN58320_c0_g2_i1;TRINITY_DN66246_c0_g1_i1;TRINITY_DN67293_c0_g1_i2;TRINITY_DN70887_c0_g1_i2;TRINITY_DN72170_c3_g8_i1;TRINITY_DN72170_c3_g9_i1;TRINITY_DN73821_c5_g2_i1;TRINITY_DN74250_c0_g1_i1;TRINITY_DN74807_c2_g1_i3;TRINITY_DN77451_c0_g4_i1;TRINITY_DN82761_c0_g1_i6;TRINITY_DN83281_c0_g1_i3;TRINITY_DN84932_c0_g1_i4;TRINITY_DN86932_c0_g2_i2;TRINITY_DN88544_c0_g3_i4;TRINITY_DN88582_c7_g2_i1…	http://amigo.geneontology.org/amigo/term/GO:0071705	BP	20
GO:0001558	regulation of cell growth	6/740	151/21795	0.406715	0.826059	TRINITY_DN68780_c0_g2_i2;TRINITY_DN69048_c0_g1_i1;TRINITY_DN74039_c0_g2_i1;TRINITY_DN77570_c2_g2_i2;TRINITY_DN87382_c0_g1_i2;TRINITY_DN88654_c0_g2_i8	http://amigo.geneontology.org/amigo/term/GO:0001558	BP	6
GO:0008285	negative regulation of cell proliferation	2/740	41/21795	0.407877	0.826059	TRINITY_DN89177_c0_g5_i1;TRINITY_DN94190_c2_g1_i20	http://amigo.geneontology.org/amigo/term/GO:0008285	BP	2
GO:0043547	positive regulation of GTPase activity	2/740	41/21795	0.407877	0.826059	TRINITY_DN90953_c2_g2_i3;TRINITY_DN218260_c0_g1_i1	http://amigo.geneontology.org/amigo/term/GO:0043547	BP	2
GO:0040014	regulation of multicellular organism growth	2/740	41/21795	0.407877	0.826059	TRINITY_DN86583_c0_g3_i1;TRINITY_DN88654_c0_g2_i8	http://amigo.geneontology.org/amigo/term/GO:0040014	BP	2
GO:0042430	indole-containing compound metabolic process	6/740	152/21795	0.412786	0.834547	TRINITY_DN70602_c0_g2_i1;TRINITY_DN73594_c1_g1_i2;TRINITY_DN82731_c0_g4_i2;TRINITY_DN86907_c3_g4_i3;TRINITY_DN88582_c7_g2_i10;TRINITY_DN89409_c1_g3_i3	http://amigo.geneontology.org/amigo/term/GO:0042430	BP	6
GO:0009967	positive regulation of signal transduction	5/740	124/21795	0.412936	0.834547	TRINITY_DN73594_c1_g1_i2;TRINITY_DN79488_c1_g6_i1;TRINITY_DN80224_c0_g2_i1;TRINITY_DN86288_c3_g4_i1;TRINITY_DN93473_c3_g1_i1	http://amigo.geneontology.org/amigo/term/GO:0009967	BP	5
GO:0023056	positive regulation of signaling	5/740	124/21795	0.412936	0.834547	TRINITY_DN73594_c1_g1_i2;TRINITY_DN79488_c1_g6_i1;TRINITY_DN80224_c0_g2_i1;TRINITY_DN86288_c3_g4_i1;TRINITY_DN93473_c3_g1_i1	http://amigo.geneontology.org/amigo/term/GO:0023056	BP	5
GO:0051276	chromosome organization	18/740	494/21795	0.413409	0.834919	TRINITY_DN71200_c0_g1_i3;TRINITY_DN72421_c2_g4_i3;TRINITY_DN74875_c0_g2_i3;TRINITY_DN75500_c1_g1_i1;TRINITY_DN78980_c2_g2_i3;TRINITY_DN79180_c4_g2_i1;TRINITY_DN79458_c0_g1_i8;TRINITY_DN79589_c0_g1_i2;TRINITY_DN80224_c0_g2_i1;TRINITY_DN80567_c0_g6_i1;TRINITY_DN80593_c0_g6_i1;TRINITY_DN80892_c0_g1_i6;TRINITY_DN86713_c0_g5_i3;TRINITY_DN88658_c1_g3_i5;TRINITY_DN89640_c2_g2_i2;TRINITY_DN92530_c0_g2_i4…	http://amigo.geneontology.org/amigo/term/GO:0051276	BP	18
GO:0016192	vesicle-mediated transport	14/740	380/21795	0.415856	0.836656	TRINITY_DN68282_c0_g1_i1;TRINITY_DN71772_c1_g1_i1;TRINITY_DN73386_c0_g5_i1;TRINITY_DN73631_c1_g2_i1;TRINITY_DN74186_c0_g1_i3;TRINITY_DN74503_c0_g1_i8;TRINITY_DN74828_c0_g1_i1;TRINITY_DN75000_c0_g2_i3;TRINITY_DN81011_c0_g2_i4;TRINITY_DN82697_c2_g3_i1;TRINITY_DN82632_c1_g2_i2;TRINITY_DN86583_c0_g3_i1;TRINITY_DN88654_c0_g2_i8;TRINITY_DN89099_c2_g5_i1	http://amigo.geneontology.org/amigo/term/GO:0016192	BP	14
GO:0042548	regulation of photosynthesis, light reaction	3/740	69/21795	0.416944	0.836656	TRINITY_DN75808_c2_g1_i1;TRINITY_DN95543_c0_g1_i1;TRINITY_DN95543_c1_g3_i1	http://amigo.geneontology.org/amigo/term/GO:0042548	BP	3
GO:0031401	positive regulation of protein modification process	4/740	97/21795	0.419446	0.836656	TRINITY_DN66001_c0_g1_i2;TRINITY_DN73594_c1_g1_i2;TRINITY_DN80224_c0_g2_i1;TRINITY_DN86288_c3_g4_i1	http://amigo.geneontology.org/amigo/term/GO:0031401	BP	4
GO:0006749	glutathione metabolic process	2/740	42/21795	0.419761	0.836656	TRINITY_DN81698_c0_g3_i1;TRINITY_DN114980_c0_g1_i1	http://amigo.geneontology.org/amigo/term/GO:0006749	BP	2
GO:0032844	regulation of homeostatic process	2/740	42/21795	0.419761	0.836656	TRINITY_DN79180_c4_g2_i1;TRINITY_DN80224_c0_g2_i1	http://amigo.geneontology.org/amigo/term/GO:0032844	BP	2
GO:1901140	p-coumaryl alcohol transport	2/740	42/21795	0.419761	0.836656	TRINITY_DN74963_c1_g2_i1;TRINITY_DN86907_c3_g4_i3	http://amigo.geneontology.org/amigo/term/GO:1901140	BP	2
GO:0009966	regulation of signal transduction	13/740	353/21795	0.422266	0.836656	TRINITY_DN57153_c0_g1_i1;TRINITY_DN68780_c0_g2_i2;TRINITY_DN71557_c0_g1_i11;TRINITY_DN73594_c1_g1_i2;TRINITY_DN73631_c1_g2_i1;TRINITY_DN75913_c2_g1_i8;TRINITY_DN78565_c0_g1_i1;TRINITY_DN79488_c1_g6_i1;TRINITY_DN80224_c0_g2_i1;TRINITY_DN86288_c3_g4_i1;TRINITY_DN93473_c3_g1_i1;TRINITY_DN94882_c0_g4_i1;TRINITY_DN218260_c0_g1_i1	http://amigo.geneontology.org/amigo/term/GO:0009966	BP	13
GO:0048443	stamen development	7/740	182/21795	0.423071	0.836656	TRINITY_DN67350_c0_g1_i1;TRINITY_DN71355_c0_g1_i1;TRINITY_DN72627_c2_g1_i3;TRINITY_DN83499_c1_g7_i1;TRINITY_DN83523_c1_g2_i2;TRINITY_DN89084_c1_g2_i3;TRINITY_DN89850_c5_g1_i3	http://amigo.geneontology.org/amigo/term/GO:0048443	BP	7
GO:0006561	proline biosynthetic process	1/740	16/21795	0.424706	0.836656	TRINITY_DN90914_c3_g2_i1	http://amigo.geneontology.org/amigo/term/GO:0006561	BP	1
GO:0031288	sorocarp morphogenesis	1/740	16/21795	0.424706	0.836656	TRINITY_DN43850_c0_g1_i1	http://amigo.geneontology.org/amigo/term/GO:0031288	BP	1
GO:0006900	vesicle budding from membrane	1/740	16/21795	0.424706	0.836656	TRINITY_DN73631_c1_g2_i1	http://amigo.geneontology.org/amigo/term/GO:0006900	BP	1
GO:0019252	starch biosynthetic process	1/740	16/21795	0.424706	0.836656	TRINITY_DN70263_c0_g1_i2	http://amigo.geneontology.org/amigo/term/GO:0019252	BP	1
GO:0032509	endosome transport via multivesicular body sorting pathway	1/740	16/21795	0.424706	0.836656	TRINITY_DN89966_c3_g2_i2	http://amigo.geneontology.org/amigo/term/GO:0032509	BP	1
GO:0015977	carbon fixation	1/740	16/21795	0.424706	0.836656	TRINITY_DN70263_c0_g1_i2	http://amigo.geneontology.org/amigo/term/GO:0015977	BP	1
GO:0006446	regulation of translational initiation	1/740	16/21795	0.424706	0.836656	TRINITY_DN80086_c0_g1_i1	http://amigo.geneontology.org/amigo/term/GO:0006446	BP	1
GO:0080050	regulation of seed development	1/740	16/21795	0.424706	0.836656	TRINITY_DN67020_c0_g1_i1	http://amigo.geneontology.org/amigo/term/GO:0080050	BP	1
GO:0071732	cellular response to nitric oxide	1/740	16/21795	0.424706	0.836656	TRINITY_DN79971_c0_g2_i4	http://amigo.geneontology.org/amigo/term/GO:0071732	BP	1
GO:0010188	response to microbial phytotoxin	1/740	16/21795	0.424706	0.836656	TRINITY_DN78503_c0_g1_i2	http://amigo.geneontology.org/amigo/term/GO:0010188	BP	1
GO:0061448	connective tissue development	1/740	16/21795	0.424706	0.836656	TRINITY_DN86288_c3_g4_i1	http://amigo.geneontology.org/amigo/term/GO:0061448	BP	1
GO:0007105	cytokinesis, site selection	1/740	16/21795	0.424706	0.836656	TRINITY_DN75000_c0_g2_i3	http://amigo.geneontology.org/amigo/term/GO:0007105	BP	1
GO:0071668	plant-type cell wall assembly	1/740	16/21795	0.424706	0.836656	TRINITY_DN92693_c1_g2_i3	http://amigo.geneontology.org/amigo/term/GO:0071668	BP	1
GO:0009660	amyloplast organization	1/740	16/21795	0.424706	0.836656	TRINITY_DN81011_c0_g2_i4	http://amigo.geneontology.org/amigo/term/GO:0009660	BP	1
GO:0031930	mitochondria-nucleus signaling pathway	1/740	16/21795	0.424706	0.836656	TRINITY_DN69811_c0_g2_i1	http://amigo.geneontology.org/amigo/term/GO:0031930	BP	1
GO:0060562	epithelial tube morphogenesis	1/740	16/21795	0.424706	0.836656	TRINITY_DN69073_c2_g1_i1	http://amigo.geneontology.org/amigo/term/GO:0060562	BP	1
GO:0061041	regulation of wound healing	1/740	16/21795	0.424706	0.836656	TRINITY_DN94190_c2_g1_i20	http://amigo.geneontology.org/amigo/term/GO:0061041	BP	1
GO:0006996	organelle organization	59/740	1688/21795	0.426998	0.840598	TRINITY_DN63938_c0_g1_i1;TRINITY_DN65799_c0_g1_i3;TRINITY_DN71200_c0_g1_i3;TRINITY_DN71317_c1_g1_i3;TRINITY_DN71954_c3_g8_i3;TRINITY_DN72421_c2_g4_i3;TRINITY_DN73326_c0_g1_i1;TRINITY_DN73326_c0_g3_i3;TRINITY_DN73631_c1_g2_i1;TRINITY_DN74186_c0_g1_i3;TRINITY_DN74764_c2_g1_i1;TRINITY_DN74875_c0_g2_i3;TRINITY_DN75000_c0_g2_i3;TRINITY_DN75500_c1_g1_i1;TRINITY_DN76437_c5_g2_i1;TRINITY_DN77139_c0_g2_i1…	http://amigo.geneontology.org/amigo/term/GO:0006996	BP	59
GO:0009692	ethylene metabolic process	2/740	43/21795	0.431522	0.847191	TRINITY_DN73594_c1_g1_i2;TRINITY_DN76129_c4_g2_i1	http://amigo.geneontology.org/amigo/term/GO:0009692	BP	2
GO:0010020	chloroplast fission	2/740	43/21795	0.431522	0.847191	TRINITY_DN87241_c2_g1_i1;TRINITY_DN97059_c7_g1_i1	http://amigo.geneontology.org/amigo/term/GO:0010020	BP	2
GO:0009693	ethylene biosynthetic process	2/740	43/21795	0.431522	0.847191	TRINITY_DN73594_c1_g1_i2;TRINITY_DN76129_c4_g2_i1	http://amigo.geneontology.org/amigo/term/GO:0009693	BP	2
GO:0006816	calcium ion transport	7/740	184/21795	0.434174	0.850491	TRINITY_DN80886_c0_g5_i2;TRINITY_DN81530_c0_g1_i6;TRINITY_DN81807_c4_g1_i3;TRINITY_DN88917_c3_g2_i1;TRINITY_DN90136_c5_g5_i2;TRINITY_DN96732_c1_g2_i4;TRINITY_DN96732_c1_g4_i3	http://amigo.geneontology.org/amigo/term/GO:0006816	BP	7
GO:0055074	calcium ion homeostasis	3/740	71/21795	0.435075	0.850491	TRINITY_DN81530_c0_g1_i6;TRINITY_DN81807_c4_g1_i3;TRINITY_DN88917_c3_g2_i1	http://amigo.geneontology.org/amigo/term/GO:0055074	BP	3
GO:0019941	modification-dependent protein catabolic process	12/740	329/21795	0.441539	0.850773	TRINITY_DN71772_c1_g1_i1;TRINITY_DN74875_c0_g2_i3;TRINITY_DN76249_c2_g1_i6;TRINITY_DN76437_c5_g2_i1;TRINITY_DN77139_c0_g2_i1;TRINITY_DN77139_c0_g3_i1;TRINITY_DN80224_c0_g2_i1;TRINITY_DN85716_c0_g1_i22;TRINITY_DN86288_c3_g4_i1;TRINITY_DN88013_c3_g8_i1;TRINITY_DN90238_c5_g3_i3;TRINITY_DN95963_c2_g3_i2	http://amigo.geneontology.org/amigo/term/GO:0019941	BP	12
GO:0000003	reproduction	97/740	2807/21795	0.441953	0.850773	TRINITY_DN19531_c0_g1_i1;TRINITY_DN43850_c0_g1_i1;TRINITY_DN62693_c0_g1_i1;TRINITY_DN63938_c0_g1_i1;TRINITY_DN64333_c0_g1_i2;TRINITY_DN66001_c0_g1_i2;TRINITY_DN67020_c0_g1_i1;TRINITY_DN67047_c0_g1_i1;TRINITY_DN67350_c0_g1_i1;TRINITY_DN68780_c0_g2_i2;TRINITY_DN68775_c1_g1_i1;TRINITY_DN69811_c0_g2_i1;TRINITY_DN70135_c0_g2_i3;TRINITY_DN70433_c0_g1_i3;TRINITY_DN70433_c0_g6_i1;TRINITY_DN70539_c0_g1_i1…	http://amigo.geneontology.org/amigo/term/GO:0000003	BP	97
GO:0006641	triglyceride metabolic process	2/740	44/21795	0.443154	0.850773	TRINITY_DN68864_c0_g1_i6;TRINITY_DN91267_c0_g4_i1	http://amigo.geneontology.org/amigo/term/GO:0006641	BP	2
GO:0016137	glycoside metabolic process	2/740	44/21795	0.443154	0.850773	TRINITY_DN68994_c0_g1_i2;TRINITY_DN93786_c0_g2_i1	http://amigo.geneontology.org/amigo/term/GO:0016137	BP	2
GO:0016139	glycoside catabolic process	2/740	44/21795	0.443154	0.850773	TRINITY_DN68994_c0_g1_i2;TRINITY_DN93786_c0_g2_i1	http://amigo.geneontology.org/amigo/term/GO:0016139	BP	2
GO:0030522	intracellular receptor signaling pathway	2/740	44/21795	0.443154	0.850773	TRINITY_DN80224_c0_g2_i1;TRINITY_DN86288_c3_g4_i1	http://amigo.geneontology.org/amigo/term/GO:0030522	BP	2
GO:0015840	urea transport	1/740	17/21795	0.444253	0.850773	TRINITY_DN91375_c1_g1_i2	http://amigo.geneontology.org/amigo/term/GO:0015840	BP	1
GO:0015846	polyamine transport	1/740	17/21795	0.444253	0.850773	TRINITY_DN86932_c0_g2_i2	http://amigo.geneontology.org/amigo/term/GO:0015846	BP	1
GO:0048568	embryonic organ development	1/740	17/21795	0.444253	0.850773	TRINITY_DN94190_c2_g1_i20	http://amigo.geneontology.org/amigo/term/GO:0048568	BP	1
GO:1902047	polyamine transmembrane transport	1/740	17/21795	0.444253	0.850773	TRINITY_DN86932_c0_g2_i2	http://amigo.geneontology.org/amigo/term/GO:1902047	BP	1
GO:0030071	regulation of mitotic metaphase/anaphase transition	1/740	17/21795	0.444253	0.850773	TRINITY_DN85106_c2_g3_i3	http://amigo.geneontology.org/amigo/term/GO:0030071	BP	1
GO:0030010	establishment of cell polarity	1/740	17/21795	0.444253	0.850773	TRINITY_DN75000_c0_g2_i3	http://amigo.geneontology.org/amigo/term/GO:0030010	BP	1
GO:0071918	urea transmembrane transport	1/740	17/21795	0.444253	0.850773	TRINITY_DN91375_c1_g1_i2	http://amigo.geneontology.org/amigo/term/GO:0071918	BP	1
GO:0071456	cellular response to hypoxia	1/740	17/21795	0.444253	0.850773	TRINITY_DN86288_c3_g4_i1	http://amigo.geneontology.org/amigo/term/GO:0071456	BP	1
GO:0010256	endomembrane system organization	1/740	17/21795	0.444253	0.850773	TRINITY_DN92028_c1_g2_i1	http://amigo.geneontology.org/amigo/term/GO:0010256	BP	1
GO:0031507	heterochromatin assembly	1/740	17/21795	0.444253	0.850773	TRINITY_DN95457_c5_g4_i1	http://amigo.geneontology.org/amigo/term/GO:0031507	BP	1
GO:0035265	organ growth	1/740	17/21795	0.444253	0.850773	TRINITY_DN75127_c1_g1_i4	http://amigo.geneontology.org/amigo/term/GO:0035265	BP	1
GO:0019605	butyrate metabolic process	1/740	17/21795	0.444253	0.850773	TRINITY_DN67629_c0_g1_i1	http://amigo.geneontology.org/amigo/term/GO:0019605	BP	1
GO:0051403	stress-activated MAPK cascade	1/740	17/21795	0.444253	0.850773	TRINITY_DN86288_c3_g4_i1	http://amigo.geneontology.org/amigo/term/GO:0051403	BP	1
GO:0003156	regulation of animal organ formation	1/740	17/21795	0.444253	0.850773	TRINITY_DN70640_c1_g1_i2	http://amigo.geneontology.org/amigo/term/GO:0003156	BP	1
GO:0031098	stress-activated protein kinase signaling cascade	1/740	17/21795	0.444253	0.850773	TRINITY_DN86288_c3_g4_i1	http://amigo.geneontology.org/amigo/term/GO:0031098	BP	1
GO:0035239	tube morphogenesis	1/740	17/21795	0.444253	0.850773	TRINITY_DN69073_c2_g1_i1	http://amigo.geneontology.org/amigo/term/GO:0035239	BP	1
GO:0045324	late endosome to vacuole transport	1/740	17/21795	0.444253	0.850773	TRINITY_DN81011_c0_g2_i4	http://amigo.geneontology.org/amigo/term/GO:0045324	BP	1
GO:0007424	open tracheal system development	1/740	17/21795	0.444253	0.850773	TRINITY_DN69073_c2_g1_i1	http://amigo.geneontology.org/amigo/term/GO:0007424	BP	1
GO:0006413	translational initiation	5/740	129/21795	0.446413	0.854343	TRINITY_DN79844_c1_g3_i7;TRINITY_DN80086_c0_g1_i1;TRINITY_DN88985_c2_g4_i3;TRINITY_DN92946_c1_g3_i6;TRINITY_DN93148_c3_g8_i2	http://amigo.geneontology.org/amigo/term/GO:0006413	BP	5
GO:0032879	regulation of localization	9/740	244/21795	0.447968	0.855617	TRINITY_DN69811_c0_g2_i1;TRINITY_DN74828_c0_g1_i1;TRINITY_DN75000_c0_g2_i3;TRINITY_DN77570_c2_g2_i2;TRINITY_DN79998_c5_g2_i1;TRINITY_DN80224_c0_g2_i1;TRINITY_DN80442_c2_g1_i2;TRINITY_DN84843_c0_g1_i5;TRINITY_DN87035_c0_g1_i6	http://amigo.geneontology.org/amigo/term/GO:0032879	BP	9
GO:0009911	positive regulation of flower development	4/740	101/21795	0.449834	0.855706	TRINITY_DN62693_c0_g1_i1;TRINITY_DN67970_c1_g1_i1;TRINITY_DN78441_c2_g1_i5;TRINITY_DN93786_c0_g2_i1	http://amigo.geneontology.org/amigo/term/GO:0009911	BP	4
GO:0043269	regulation of ion transport	5/740	130/21795	0.453055	0.855706	TRINITY_DN74828_c0_g1_i1;TRINITY_DN77570_c2_g2_i2;TRINITY_DN80442_c2_g1_i2;TRINITY_DN84843_c0_g1_i5;TRINITY_DN87035_c0_g1_i6	http://amigo.geneontology.org/amigo/term/GO:0043269	BP	5
GO:0023051	regulation of signaling	13/740	361/21795	0.454108	0.855706	TRINITY_DN57153_c0_g1_i1;TRINITY_DN68780_c0_g2_i2;TRINITY_DN71557_c0_g1_i11;TRINITY_DN73594_c1_g1_i2;TRINITY_DN73631_c1_g2_i1;TRINITY_DN75913_c2_g1_i8;TRINITY_DN78565_c0_g1_i1;TRINITY_DN79488_c1_g6_i1;TRINITY_DN80224_c0_g2_i1;TRINITY_DN86288_c3_g4_i1;TRINITY_DN93473_c3_g1_i1;TRINITY_DN94882_c0_g4_i1;TRINITY_DN218260_c0_g1_i1	http://amigo.geneontology.org/amigo/term/GO:0023051	BP	13
GO:0043087	regulation of GTPase activity	2/740	45/21795	0.454652	0.855706	TRINITY_DN90953_c2_g2_i3;TRINITY_DN218260_c0_g1_i1	http://amigo.geneontology.org/amigo/term/GO:0043087	BP	2
GO:0016226	iron-sulfur cluster assembly	2/740	45/21795	0.454652	0.855706	TRINITY_DN48212_c0_g1_i1;TRINITY_DN82848_c5_g2_i3	http://amigo.geneontology.org/amigo/term/GO:0016226	BP	2
GO:0046488	phosphatidylinositol metabolic process	2/740	45/21795	0.454652	0.855706	TRINITY_DN83157_c6_g4_i1;TRINITY_DN92028_c1_g2_i1	http://amigo.geneontology.org/amigo/term/GO:0046488	BP	2
GO:0000209	protein polyubiquitination	2/740	45/21795	0.454652	0.855706	TRINITY_DN80224_c0_g2_i1;TRINITY_DN86288_c3_g4_i1	http://amigo.geneontology.org/amigo/term/GO:0000209	BP	2
GO:0071472	cellular response to salt stress	2/740	45/21795	0.454652	0.855706	TRINITY_DN81530_c0_g1_i6;TRINITY_DN81807_c4_g1_i3	http://amigo.geneontology.org/amigo/term/GO:0071472	BP	2
GO:0002682	regulation of immune system process	6/740	159/21795	0.455024	0.855706	TRINITY_DN77283_c0_g1_i4;TRINITY_DN77283_c0_g5_i1;TRINITY_DN80224_c0_g2_i1;TRINITY_DN86288_c3_g4_i1;TRINITY_DN94190_c2_g1_i20;TRINITY_DN94882_c0_g4_i1	http://amigo.geneontology.org/amigo/term/GO:0002682	BP	6
GO:0044262	cellular carbohydrate metabolic process	23/740	652/21795	0.455572	0.855706	TRINITY_DN42865_c0_g1_i2;TRINITY_DN68994_c0_g1_i2;TRINITY_DN69811_c0_g2_i1;TRINITY_DN70263_c0_g1_i2;TRINITY_DN74169_c0_g7_i1;TRINITY_DN75350_c1_g3_i2;TRINITY_DN75732_c1_g1_i6;TRINITY_DN76717_c5_g1_i1;TRINITY_DN78940_c0_g4_i2;TRINITY_DN81193_c0_g2_i4;TRINITY_DN81193_c0_g1_i3;TRINITY_DN82953_c1_g1_i7;TRINITY_DN84017_c0_g8_i1;TRINITY_DN84005_c0_g1_i6;TRINITY_DN84020_c3_g3_i4;TRINITY_DN87396_c1_g3_i1…	http://amigo.geneontology.org/amigo/term/GO:0044262	BP	23
GO:0048563	post-embryonic animal organ morphogenesis	5/740	131/21795	0.459676	0.855706	TRINITY_DN62693_c0_g1_i1;TRINITY_DN67350_c0_g1_i1;TRINITY_DN71355_c0_g1_i1;TRINITY_DN90042_c0_g4_i2;TRINITY_DN92796_c5_g1_i1	http://amigo.geneontology.org/amigo/term/GO:0048563	BP	5
GO:1900140	regulation of seedling development	5/740	131/21795	0.459676	0.855706	TRINITY_DN73294_c5_g2_i2;TRINITY_DN78565_c0_g1_i1;TRINITY_DN79447_c3_g1_i1;TRINITY_DN85344_c1_g3_i2;TRINITY_DN93504_c0_g1_i1	http://amigo.geneontology.org/amigo/term/GO:1900140	BP	5
GO:0000165	MAPK cascade	3/740	74/21795	0.461863	0.855706	TRINITY_DN72538_c0_g1_i2;TRINITY_DN73594_c1_g1_i2;TRINITY_DN86288_c3_g4_i1	http://amigo.geneontology.org/amigo/term/GO:0000165	BP	3
GO:0044344	cellular response to fibroblast growth factor stimulus	1/740	18/21795	0.463137	0.855706	TRINITY_DN86288_c3_g4_i1	http://amigo.geneontology.org/amigo/term/GO:0044344	BP	1
GO:0072422	signal transduction involved in DNA damage checkpoint	1/740	18/21795	0.463137	0.855706	TRINITY_DN86288_c3_g4_i1	http://amigo.geneontology.org/amigo/term/GO:0072422	BP	1
GO:0006977	DNA damage response, signal transduction by p53 class mediator resulting in cell cycle arrest	1/740	18/21795	0.463137	0.855706	TRINITY_DN86288_c3_g4_i1	http://amigo.geneontology.org/amigo/term/GO:0006977	BP	1
GO:2000024	regulation of leaf development	1/740	18/21795	0.463137	0.855706	TRINITY_DN53892_c1_g1_i1	http://amigo.geneontology.org/amigo/term/GO:2000024	BP	1
GO:0070828	heterochromatin organization	1/740	18/21795	0.463137	0.855706	TRINITY_DN95457_c5_g4_i1	http://amigo.geneontology.org/amigo/term/GO:0070828	BP	1
GO:0061062	regulation of nematode larval development	1/740	18/21795	0.463137	0.855706	TRINITY_DN94246_c6_g1_i2	http://amigo.geneontology.org/amigo/term/GO:0061062	BP	1
GO:0071774	response to fibroblast growth factor	1/740	18/21795	0.463137	0.855706	TRINITY_DN86288_c3_g4_i1	http://amigo.geneontology.org/amigo/term/GO:0071774	BP	1
GO:0019860	uracil metabolic process	1/740	18/21795	0.463137	0.855706	TRINITY_DN93805_c2_g1_i3	http://amigo.geneontology.org/amigo/term/GO:0019860	BP	1
GO:0010253	UDP-rhamnose biosynthetic process	1/740	18/21795	0.463137	0.855706	TRINITY_DN76793_c1_g1_i2	http://amigo.geneontology.org/amigo/term/GO:0010253	BP	1
GO:0007032	endosome organization	1/740	18/21795	0.463137	0.855706	TRINITY_DN81011_c0_g2_i4	http://amigo.geneontology.org/amigo/term/GO:0007032	BP	1
GO:0000023	maltose metabolic process	1/740	18/21795	0.463137	0.855706	TRINITY_DN76717_c5_g1_i1	http://amigo.geneontology.org/amigo/term/GO:0000023	BP	1
GO:0071158	positive regulation of cell cycle arrest	1/740	18/21795	0.463137	0.855706	TRINITY_DN86288_c3_g4_i1	http://amigo.geneontology.org/amigo/term/GO:0071158	BP	1
GO:0008543	fibroblast growth factor receptor signaling pathway	1/740	18/21795	0.463137	0.855706	TRINITY_DN86288_c3_g4_i1	http://amigo.geneontology.org/amigo/term/GO:0008543	BP	1
GO:0010470	regulation of gastrulation	1/740	18/21795	0.463137	0.855706	TRINITY_DN218260_c0_g1_i1	http://amigo.geneontology.org/amigo/term/GO:0010470	BP	1
GO:0051436	negative regulation of ubiquitin-protein ligase activity involved in mitotic cell cycle	1/740	18/21795	0.463137	0.855706	TRINITY_DN86288_c3_g4_i1	http://amigo.geneontology.org/amigo/term/GO:0051436	BP	1
GO:0002683	negative regulation of immune system process	1/740	18/21795	0.463137	0.855706	TRINITY_DN94882_c0_g4_i1	http://amigo.geneontology.org/amigo/term/GO:0002683	BP	1
GO:0072413	signal transduction involved in mitotic cell cycle checkpoint	1/740	18/21795	0.463137	0.855706	TRINITY_DN86288_c3_g4_i1	http://amigo.geneontology.org/amigo/term/GO:0072413	BP	1
GO:0072431	signal transduction involved in mitotic G1 DNA damage checkpoint	1/740	18/21795	0.463137	0.855706	TRINITY_DN86288_c3_g4_i1	http://amigo.geneontology.org/amigo/term/GO:0072431	BP	1
GO:0010449	root meristem growth	1/740	18/21795	0.463137	0.855706	TRINITY_DN69811_c0_g2_i1	http://amigo.geneontology.org/amigo/term/GO:0010449	BP	1
GO:0006212	uracil catabolic process	1/740	18/21795	0.463137	0.855706	TRINITY_DN93805_c2_g1_i3	http://amigo.geneontology.org/amigo/term/GO:0006212	BP	1
GO:0070726	cell wall assembly	1/740	18/21795	0.463137	0.855706	TRINITY_DN92693_c1_g2_i3	http://amigo.geneontology.org/amigo/term/GO:0070726	BP	1
GO:0032544	plastid translation	1/740	18/21795	0.463137	0.855706	TRINITY_DN65799_c0_g1_i3	http://amigo.geneontology.org/amigo/term/GO:0032544	BP	1
GO:0046546	development of primary male sexual characteristics	1/740	18/21795	0.463137	0.855706	TRINITY_DN86288_c3_g4_i1	http://amigo.geneontology.org/amigo/term/GO:0046546	BP	1
GO:0009423	chorismate biosynthetic process	1/740	18/21795	0.463137	0.855706	TRINITY_DN81835_c2_g1_i3	http://amigo.geneontology.org/amigo/term/GO:0009423	BP	1
GO:0043618	regulation of transcription from RNA polymerase II promoter in response to stress	1/740	18/21795	0.463137	0.855706	TRINITY_DN86288_c3_g4_i1	http://amigo.geneontology.org/amigo/term/GO:0043618	BP	1
GO:0051130	positive regulation of cellular component organization	4/740	103/21795	0.464839	0.857751	TRINITY_DN66001_c0_g1_i2;TRINITY_DN79180_c4_g2_i1;TRINITY_DN80224_c0_g2_i1;TRINITY_DN90636_c0_g1_i7	http://amigo.geneontology.org/amigo/term/GO:0051130	BP	4
GO:0016122	xanthophyll metabolic process	2/740	46/21795	0.466013	0.857952	TRINITY_DN73481_c7_g1_i1;TRINITY_DN73693_c0_g3_i2	http://amigo.geneontology.org/amigo/term/GO:0016122	BP	2
GO:0046459	short-chain fatty acid metabolic process	2/740	46/21795	0.466013	0.857952	TRINITY_DN67629_c0_g1_i1;TRINITY_DN91192_c0_g11_i1	http://amigo.geneontology.org/amigo/term/GO:0046459	BP	2
GO:0030029	actin filament-based process	5/740	132/21795	0.466273	0.857952	TRINITY_DN74764_c2_g1_i1;TRINITY_DN75000_c0_g2_i3;TRINITY_DN86713_c0_g5_i3;TRINITY_DN94190_c2_g1_i20;TRINITY_DN95483_c2_g1_i3	http://amigo.geneontology.org/amigo/term/GO:0030029	BP	5
GO:0051604	protein maturation	3/740	75/21795	0.47067	0.865194	TRINITY_DN75205_c1_g6_i1;TRINITY_DN89072_c0_g1_i1;TRINITY_DN92311_c0_g4_i4	http://amigo.geneontology.org/amigo/term/GO:0051604	BP	3
GO:0030243	cellulose metabolic process	4/740	104/21795	0.472287	0.867603	TRINITY_DN74169_c0_g7_i1;TRINITY_DN84017_c0_g8_i1;TRINITY_DN87396_c1_g3_i1;TRINITY_DN87396_c1_g2_i6	http://amigo.geneontology.org/amigo/term/GO:0030243	BP	4
GO:0008219	cell death	12/740	337/21795	0.474637	0.869715	TRINITY_DN50025_c0_g1_i1;TRINITY_DN67443_c0_g1_i2;TRINITY_DN75702_c2_g1_i1;TRINITY_DN79971_c0_g2_i4;TRINITY_DN84755_c2_g5_i3;TRINITY_DN86288_c3_g4_i1;TRINITY_DN86284_c4_g7_i1;TRINITY_DN90038_c1_g1_i2;TRINITY_DN90038_c2_g6_i2;TRINITY_DN90204_c2_g3_i5;TRINITY_DN94190_c2_g1_i20;TRINITY_DN96272_c4_g2_i1	http://amigo.geneontology.org/amigo/term/GO:0008219	BP	12
GO:0006829	zinc II ion transport	2/740	47/21795	0.477233	0.871558	TRINITY_DN89234_c2_g5_i2;TRINITY_DN90668_c1_g3_i1	http://amigo.geneontology.org/amigo/term/GO:0006829	BP	2
GO:0009944	polarity specification of adaxial/abaxial axis	2/740	47/21795	0.477233	0.871558	TRINITY_DN67876_c0_g1_i2;TRINITY_DN92040_c0_g1_i11	http://amigo.geneontology.org/amigo/term/GO:0009944	BP	2
GO:0009787	regulation of abscisic acid-activated signaling pathway	4/740	105/21795	0.479696	0.871558	TRINITY_DN68780_c0_g2_i2;TRINITY_DN79488_c1_g6_i1;TRINITY_DN93473_c3_g1_i1;TRINITY_DN94882_c0_g4_i1	http://amigo.geneontology.org/amigo/term/GO:0009787	BP	4
GO:0006282	regulation of DNA repair	1/740	19/21795	0.48138	0.871558	TRINITY_DN80224_c0_g2_i1	http://amigo.geneontology.org/amigo/term/GO:0006282	BP	1
GO:0042726	flavin-containing compound metabolic process	1/740	19/21795	0.48138	0.871558	TRINITY_DN86587_c2_g1_i3	http://amigo.geneontology.org/amigo/term/GO:0042726	BP	1
GO:0015713	phosphoglycerate transport	1/740	19/21795	0.48138	0.871558	TRINITY_DN91981_c0_g3_i2	http://amigo.geneontology.org/amigo/term/GO:0015713	BP	1
GO:0051444	negative regulation of ubiquitin-protein transferase activity	1/740	19/21795	0.48138	0.871558	TRINITY_DN86288_c3_g4_i1	http://amigo.geneontology.org/amigo/term/GO:0051444	BP	1
GO:0042770	signal transduction in response to DNA damage	1/740	19/21795	0.48138	0.871558	TRINITY_DN86288_c3_g4_i1	http://amigo.geneontology.org/amigo/term/GO:0042770	BP	1
GO:0051439	regulation of ubiquitin-protein ligase activity involved in mitotic cell cycle	1/740	19/21795	0.48138	0.871558	TRINITY_DN86288_c3_g4_i1	http://amigo.geneontology.org/amigo/term/GO:0051439	BP	1
GO:0051437	positive regulation of ubiquitin-protein ligase activity involved in regulation of mitotic cell cycle transition	1/740	19/21795	0.48138	0.871558	TRINITY_DN86288_c3_g4_i1	http://amigo.geneontology.org/amigo/term/GO:0051437	BP	1
GO:0035304	regulation of protein dephosphorylation	1/740	19/21795	0.48138	0.871558	TRINITY_DN79488_c1_g6_i1	http://amigo.geneontology.org/amigo/term/GO:0035304	BP	1
GO:0009959	negative gravitropism	1/740	19/21795	0.48138	0.871558	TRINITY_DN81011_c0_g2_i4	http://amigo.geneontology.org/amigo/term/GO:0009959	BP	1
GO:0072395	signal transduction involved in cell cycle checkpoint	1/740	19/21795	0.48138	0.871558	TRINITY_DN86288_c3_g4_i1	http://amigo.geneontology.org/amigo/term/GO:0072395	BP	1
GO:0046786	viral replication complex formation and maintenance	1/740	19/21795	0.48138	0.871558	TRINITY_DN74352_c11_g3_i3	http://amigo.geneontology.org/amigo/term/GO:0046786	BP	1
GO:0043620	regulation of DNA-templated transcription in response to stress	1/740	19/21795	0.48138	0.871558	TRINITY_DN86288_c3_g4_i1	http://amigo.geneontology.org/amigo/term/GO:0043620	BP	1
GO:0048359	mucilage metabolic process involved in seed coat development	1/740	19/21795	0.48138	0.871558	TRINITY_DN70539_c0_g1_i1	http://amigo.geneontology.org/amigo/term/GO:0048359	BP	1
GO:0010587	miRNA catabolic process	1/740	19/21795	0.48138	0.871558	TRINITY_DN81710_c1_g6_i1	http://amigo.geneontology.org/amigo/term/GO:0010587	BP	1
GO:0030330	DNA damage response, signal transduction by p53 class mediator	1/740	19/21795	0.48138	0.871558	TRINITY_DN86288_c3_g4_i1	http://amigo.geneontology.org/amigo/term/GO:0030330	BP	1
GO:2000243	positive regulation of reproductive process	4/740	106/21795	0.487064	0.876898	TRINITY_DN62693_c0_g1_i1;TRINITY_DN67970_c1_g1_i1;TRINITY_DN78441_c2_g1_i5;TRINITY_DN93786_c0_g2_i1	http://amigo.geneontology.org/amigo/term/GO:2000243	BP	4
GO:0006639	acylglycerol metabolic process	2/740	48/21795	0.488307	0.877493	TRINITY_DN68864_c0_g1_i6;TRINITY_DN91267_c0_g4_i1	http://amigo.geneontology.org/amigo/term/GO:0006639	BP	2
GO:0006638	neutral lipid metabolic process	2/740	48/21795	0.488307	0.877493	TRINITY_DN68864_c0_g1_i6;TRINITY_DN91267_c0_g4_i1	http://amigo.geneontology.org/amigo/term/GO:0006638	BP	2
GO:0009943	adaxial/abaxial axis specification	2/740	48/21795	0.488307	0.877493	TRINITY_DN67876_c0_g1_i2;TRINITY_DN92040_c0_g1_i11	http://amigo.geneontology.org/amigo/term/GO:0009943	BP	2
GO:0010646	regulation of cell communication	13/740	370/21795	0.489708	0.879064	TRINITY_DN57153_c0_g1_i1;TRINITY_DN68780_c0_g2_i2;TRINITY_DN71557_c0_g1_i11;TRINITY_DN73594_c1_g1_i2;TRINITY_DN73631_c1_g2_i1;TRINITY_DN75913_c2_g1_i8;TRINITY_DN78565_c0_g1_i1;TRINITY_DN79488_c1_g6_i1;TRINITY_DN80224_c0_g2_i1;TRINITY_DN86288_c3_g4_i1;TRINITY_DN93473_c3_g1_i1;TRINITY_DN94882_c0_g4_i1;TRINITY_DN218260_c0_g1_i1	http://amigo.geneontology.org/amigo/term/GO:0010646	BP	13
GO:0010647	positive regulation of cell communication	5/740	136/21795	0.4924	0.879064	TRINITY_DN73594_c1_g1_i2;TRINITY_DN79488_c1_g6_i1;TRINITY_DN80224_c0_g2_i1;TRINITY_DN86288_c3_g4_i1;TRINITY_DN93473_c3_g1_i1	http://amigo.geneontology.org/amigo/term/GO:0010647	BP	5
GO:0010200	response to chitin	6/740	166/21795	0.496516	0.879064	TRINITY_DN72423_c0_g1_i1;TRINITY_DN72423_c1_g1_i2;TRINITY_DN79602_c0_g1_i2;TRINITY_DN86354_c1_g6_i1;TRINITY_DN86354_c1_g1_i2;TRINITY_DN94696_c0_g7_i1	http://amigo.geneontology.org/amigo/term/GO:0010200	BP	6
GO:0048284	organelle fusion	3/740	78/21795	0.496688	0.879064	TRINITY_DN74186_c0_g1_i3;TRINITY_DN75000_c0_g2_i3;TRINITY_DN90238_c5_g3_i3	http://amigo.geneontology.org/amigo/term/GO:0048284	BP	3
GO:0010025	wax biosynthetic process	3/740	78/21795	0.496688	0.879064	TRINITY_DN73033_c0_g3_i1;TRINITY_DN85827_c2_g1_i4;TRINITY_DN215683_c0_g1_i1	http://amigo.geneontology.org/amigo/term/GO:0010025	BP	3
GO:0001676	long-chain fatty acid metabolic process	3/740	78/21795	0.496688	0.879064	TRINITY_DN82128_c1_g2_i2;TRINITY_DN88823_c0_g3_i1;TRINITY_DN212533_c0_g1_i1	http://amigo.geneontology.org/amigo/term/GO:0001676	BP	3
GO:0019762	glucosinolate catabolic process	3/740	78/21795	0.496688	0.879064	TRINITY_DN86907_c3_g4_i3;TRINITY_DN88582_c7_g2_i10;TRINITY_DN123479_c0_g1_i1	http://amigo.geneontology.org/amigo/term/GO:0019762	BP	3
GO:0051014	actin filament severing	1/740	20/21795	0.499004	0.879064	TRINITY_DN95483_c2_g1_i3	http://amigo.geneontology.org/amigo/term/GO:0051014	BP	1
GO:2000028	regulation of photoperiodism, flowering	1/740	20/21795	0.499004	0.879064	TRINITY_DN75500_c1_g1_i1	http://amigo.geneontology.org/amigo/term/GO:2000028	BP	1
GO:0046661	male sex differentiation	1/740	20/21795	0.499004	0.879064	TRINITY_DN86288_c3_g4_i1	http://amigo.geneontology.org/amigo/term/GO:0046661	BP	1
GO:0032922	circadian regulation of gene expression	1/740	20/21795	0.499004	0.879064	TRINITY_DN78980_c2_g2_i3	http://amigo.geneontology.org/amigo/term/GO:0032922	BP	1
GO:0007349	cellularization	1/740	20/21795	0.499004	0.879064	TRINITY_DN71772_c1_g1_i1	http://amigo.geneontology.org/amigo/term/GO:0007349	BP	1
GO:0019344	cysteine biosynthetic process	1/740	20/21795	0.499004	0.879064	TRINITY_DN86666_c2_g5_i1	http://amigo.geneontology.org/amigo/term/GO:0019344	BP	1
GO:0032885	regulation of polysaccharide biosynthetic process	1/740	20/21795	0.499004	0.879064	TRINITY_DN72127_c0_g4_i3	http://amigo.geneontology.org/amigo/term/GO:0032885	BP	1
GO:0007338	single fertilization	1/740	20/21795	0.499004	0.879064	TRINITY_DN88917_c3_g2_i1	http://amigo.geneontology.org/amigo/term/GO:0007338	BP	1
GO:1902023	L-arginine transport	1/740	20/21795	0.499004	0.879064	TRINITY_DN90456_c1_g1_i1	http://amigo.geneontology.org/amigo/term/GO:1902023	BP	1
GO:0009953	dorsal/ventral pattern formation	1/740	20/21795	0.499004	0.879064	TRINITY_DN71772_c1_g1_i1	http://amigo.geneontology.org/amigo/term/GO:0009953	BP	1
GO:0031145	anaphase-promoting complex-dependent catabolic process	1/740	20/21795	0.499004	0.879064	TRINITY_DN86288_c3_g4_i1	http://amigo.geneontology.org/amigo/term/GO:0031145	BP	1
GO:0035690	cellular response to drug	1/740	20/21795	0.499004	0.879064	TRINITY_DN88917_c3_g2_i1	http://amigo.geneontology.org/amigo/term/GO:0035690	BP	1
GO:0051938	L-glutamate import	1/740	20/21795	0.499004	0.879064	TRINITY_DN90456_c1_g1_i1	http://amigo.geneontology.org/amigo/term/GO:0051938	BP	1
GO:0048586	regulation of long-day photoperiodism, flowering	1/740	20/21795	0.499004	0.879064	TRINITY_DN75500_c1_g1_i1	http://amigo.geneontology.org/amigo/term/GO:0048586	BP	1
GO:0043091	L-arginine import	1/740	20/21795	0.499004	0.879064	TRINITY_DN90456_c1_g1_i1	http://amigo.geneontology.org/amigo/term/GO:0043091	BP	1
GO:0048441	petal development	2/740	49/21795	0.499233	0.879064	TRINITY_DN83523_c1_g2_i2;TRINITY_DN90042_c0_g4_i2	http://amigo.geneontology.org/amigo/term/GO:0048441	BP	2
GO:0071901	negative regulation of protein serine/threonine kinase activity	2/740	49/21795	0.499233	0.879064	TRINITY_DN71557_c0_g1_i11;TRINITY_DN75913_c2_g1_i8	http://amigo.geneontology.org/amigo/term/GO:0071901	BP	2
GO:0042303	molting cycle	2/740	49/21795	0.499233	0.879064	TRINITY_DN84901_c3_g3_i1;TRINITY_DN94190_c2_g1_i20	http://amigo.geneontology.org/amigo/term/GO:0042303	BP	2
GO:1901141	regulation of lignin biosynthetic process	2/740	49/21795	0.499233	0.879064	TRINITY_DN74963_c1_g2_i1;TRINITY_DN86907_c3_g4_i3	http://amigo.geneontology.org/amigo/term/GO:1901141	BP	2
GO:0033043	regulation of organelle organization	6/740	167/21795	0.502359	0.883591	TRINITY_DN66001_c0_g1_i2;TRINITY_DN79180_c4_g2_i1;TRINITY_DN80224_c0_g2_i1;TRINITY_DN85106_c2_g3_i3;TRINITY_DN88654_c0_g2_i8;TRINITY_DN90636_c0_g1_i7	http://amigo.geneontology.org/amigo/term/GO:0033043	BP	6
GO:0000902	cell morphogenesis	23/740	668/21795	0.502926	0.883949	TRINITY_DN68815_c0_g1_i1;TRINITY_DN68971_c0_g1_i1;TRINITY_DN69048_c0_g1_i1;TRINITY_DN69993_c2_g2_i1;TRINITY_DN70539_c0_g1_i1;TRINITY_DN70602_c0_g1_i1;TRINITY_DN70602_c0_g2_i1;TRINITY_DN73033_c0_g3_i1;TRINITY_DN75500_c1_g1_i1;TRINITY_DN77419_c0_g1_i10;TRINITY_DN78072_c0_g2_i20;TRINITY_DN80224_c0_g2_i1;TRINITY_DN80331_c0_g6_i1;TRINITY_DN80415_c4_g1_i1;TRINITY_DN81327_c0_g2_i2;TRINITY_DN83949_c1_g2_…	http://amigo.geneontology.org/amigo/term/GO:0000902	BP	23
GO:0032270	positive regulation of cellular protein metabolic process	5/740	138/21795	0.505288	0.884885	TRINITY_DN65799_c0_g1_i3;TRINITY_DN66001_c0_g1_i2;TRINITY_DN73594_c1_g1_i2;TRINITY_DN80224_c0_g2_i1;TRINITY_DN86288_c3_g4_i1	http://amigo.geneontology.org/amigo/term/GO:0032270	BP	5
GO:0007034	vacuolar transport	4/740	109/21795	0.508906	0.884885	TRINITY_DN74186_c0_g1_i3;TRINITY_DN81011_c0_g2_i4;TRINITY_DN82697_c2_g3_i1;TRINITY_DN86583_c0_g3_i1	http://amigo.geneontology.org/amigo/term/GO:0007034	BP	4
GO:0033673	negative regulation of kinase activity	2/740	50/21795	0.510008	0.884885	TRINITY_DN71557_c0_g1_i11;TRINITY_DN75913_c2_g1_i8	http://amigo.geneontology.org/amigo/term/GO:0033673	BP	2
GO:0006469	negative regulation of protein kinase activity	2/740	50/21795	0.510008	0.884885	TRINITY_DN71557_c0_g1_i11;TRINITY_DN75913_c2_g1_i8	http://amigo.geneontology.org/amigo/term/GO:0006469	BP	2
GO:0042744	hydrogen peroxide catabolic process	2/740	50/21795	0.510008	0.884885	TRINITY_DN90204_c2_g3_i5;TRINITY_DN95935_c2_g1_i2	http://amigo.geneontology.org/amigo/term/GO:0042744	BP	2
GO:0065001	specification of axis polarity	2/740	50/21795	0.510008	0.884885	TRINITY_DN67876_c0_g1_i2;TRINITY_DN92040_c0_g1_i11	http://amigo.geneontology.org/amigo/term/GO:0065001	BP	2
GO:0051592	response to calcium ion	2/740	50/21795	0.510008	0.884885	TRINITY_DN65230_c0_g2_i1;TRINITY_DN78762_c0_g4_i13	http://amigo.geneontology.org/amigo/term/GO:0051592	BP	2
GO:0031056	regulation of histone modification	2/740	50/21795	0.510008	0.884885	TRINITY_DN66001_c0_g1_i2;TRINITY_DN80224_c0_g2_i1	http://amigo.geneontology.org/amigo/term/GO:0031056	BP	2
GO:0035725	sodium ion transmembrane transport	2/740	50/21795	0.510008	0.884885	TRINITY_DN81530_c0_g1_i6;TRINITY_DN81807_c4_g1_i3	http://amigo.geneontology.org/amigo/term/GO:0035725	BP	2
GO:0034976	response to endoplasmic reticulum stress	2/740	50/21795	0.510008	0.884885	TRINITY_DN69285_c0_g1_i1;TRINITY_DN90238_c5_g3_i3	http://amigo.geneontology.org/amigo/term/GO:0034976	BP	2
GO:0009845	seed germination	5/740	139/21795	0.511683	0.884885	TRINITY_DN67782_c0_g1_i1;TRINITY_DN67970_c1_g1_i1;TRINITY_DN69497_c0_g1_i2;TRINITY_DN81512_c2_g2_i1;TRINITY_DN84314_c0_g2_i9	http://amigo.geneontology.org/amigo/term/GO:0009845	BP	5
GO:0006464	cellular protein modification process	65/740	1910/21795	0.511685	0.884885	TRINITY_DN65128_c0_g1_i3;TRINITY_DN67047_c0_g1_i1;TRINITY_DN69048_c0_g1_i1;TRINITY_DN69285_c0_g1_i1;TRINITY_DN71639_c1_g3_i1;TRINITY_DN71772_c1_g1_i1;TRINITY_DN72421_c2_g4_i3;TRINITY_DN72538_c0_g1_i2;TRINITY_DN72765_c0_g1_i1;TRINITY_DN73242_c7_g1_i9;TRINITY_DN73594_c1_g1_i2;TRINITY_DN74399_c0_g2_i2;TRINITY_DN74802_c4_g3_i1;TRINITY_DN74828_c0_g1_i1;TRINITY_DN74875_c0_g2_i3;TRINITY_DN75500_c1_g1_i1…	http://amigo.geneontology.org/amigo/term/GO:0006464	BP	65
GO:0036211	protein modification process	65/740	1910/21795	0.511685	0.884885	TRINITY_DN65128_c0_g1_i3;TRINITY_DN67047_c0_g1_i1;TRINITY_DN69048_c0_g1_i1;TRINITY_DN69285_c0_g1_i1;TRINITY_DN71639_c1_g3_i1;TRINITY_DN71772_c1_g1_i1;TRINITY_DN72421_c2_g4_i3;TRINITY_DN72538_c0_g1_i2;TRINITY_DN72765_c0_g1_i1;TRINITY_DN73242_c7_g1_i9;TRINITY_DN73594_c1_g1_i2;TRINITY_DN74399_c0_g2_i2;TRINITY_DN74802_c4_g3_i1;TRINITY_DN74828_c0_g1_i1;TRINITY_DN74875_c0_g2_i3;TRINITY_DN75500_c1_g1_i1…	http://amigo.geneontology.org/amigo/term/GO:0036211	BP	65
GO:0010166	wax metabolic process	3/740	80/21795	0.513671	0.884885	TRINITY_DN73033_c0_g3_i1;TRINITY_DN85827_c2_g1_i4;TRINITY_DN215683_c0_g1_i1	http://amigo.geneontology.org/amigo/term/GO:0010166	BP	3
GO:0045851	pH reduction	1/740	21/21795	0.51603	0.884885	TRINITY_DN83913_c3_g5_i1	http://amigo.geneontology.org/amigo/term/GO:0045851	BP	1
GO:0010597	green leaf volatile biosynthetic process	1/740	21/21795	0.51603	0.884885	TRINITY_DN71562_c3_g1_i1	http://amigo.geneontology.org/amigo/term/GO:0010597	BP	1
GO:0071333	cellular response to glucose stimulus	1/740	21/21795	0.51603	0.884885	TRINITY_DN66576_c0_g1_i2	http://amigo.geneontology.org/amigo/term/GO:0071333	BP	1
GO:0071326	cellular response to monosaccharide stimulus	1/740	21/21795	0.51603	0.884885	TRINITY_DN66576_c0_g1_i2	http://amigo.geneontology.org/amigo/term/GO:0071326	BP	1
GO:0035023	regulation of Rho protein signal transduction	1/740	21/21795	0.51603	0.884885	TRINITY_DN218260_c0_g1_i1	http://amigo.geneontology.org/amigo/term/GO:0035023	BP	1
GO:0051452	intracellular pH reduction	1/740	21/21795	0.51603	0.884885	TRINITY_DN83913_c3_g5_i1	http://amigo.geneontology.org/amigo/term/GO:0051452	BP	1
GO:0042590	antigen processing and presentation of exogenous peptide antigen via MHC class I	1/740	21/21795	0.51603	0.884885	TRINITY_DN86288_c3_g4_i1	http://amigo.geneontology.org/amigo/term/GO:0042590	BP	1
GO:0006954	inflammatory response	1/740	21/21795	0.51603	0.884885	TRINITY_DN91427_c7_g2_i3	http://amigo.geneontology.org/amigo/term/GO:0006954	BP	1
GO:0072530	purine-containing compound transmembrane transport	1/740	21/21795	0.51603	0.884885	TRINITY_DN82761_c0_g1_i6	http://amigo.geneontology.org/amigo/term/GO:0072530	BP	1
GO:0010440	stomatal lineage progression	1/740	21/21795	0.51603	0.884885	TRINITY_DN73781_c4_g8_i1	http://amigo.geneontology.org/amigo/term/GO:0010440	BP	1
GO:0016055	Wnt signaling pathway	1/740	21/21795	0.51603	0.884885	TRINITY_DN94190_c2_g1_i20	http://amigo.geneontology.org/amigo/term/GO:0016055	BP	1
GO:0000103	sulfate assimilation	1/740	21/21795	0.51603	0.884885	TRINITY_DN90452_c1_g6_i1	http://amigo.geneontology.org/amigo/term/GO:0000103	BP	1
GO:0032204	regulation of telomere maintenance	1/740	21/21795	0.51603	0.884885	TRINITY_DN79180_c4_g2_i1	http://amigo.geneontology.org/amigo/term/GO:0032204	BP	1
GO:0050994	regulation of lipid catabolic process	1/740	21/21795	0.51603	0.884885	TRINITY_DN69811_c0_g2_i1	http://amigo.geneontology.org/amigo/term/GO:0050994	BP	1
GO:0008105	asymmetric protein localization	1/740	21/21795	0.51603	0.884885	TRINITY_DN218260_c0_g1_i1	http://amigo.geneontology.org/amigo/term/GO:0008105	BP	1
GO:0001678	cellular glucose homeostasis	1/740	21/21795	0.51603	0.884885	TRINITY_DN66576_c0_g1_i2	http://amigo.geneontology.org/amigo/term/GO:0001678	BP	1
GO:0002479	antigen processing and presentation of exogenous peptide antigen via MHC class I, TAP-dependent	1/740	21/21795	0.51603	0.884885	TRINITY_DN86288_c3_g4_i1	http://amigo.geneontology.org/amigo/term/GO:0002479	BP	1
GO:0051647	nucleus localization	1/740	21/21795	0.51603	0.884885	TRINITY_DN71772_c1_g1_i1	http://amigo.geneontology.org/amigo/term/GO:0051647	BP	1
GO:0019374	galactolipid metabolic process	1/740	21/21795	0.51603	0.884885	TRINITY_DN89601_c0_g3_i8	http://amigo.geneontology.org/amigo/term/GO:0019374	BP	1
GO:0045491	xylan metabolic process	2/740	51/21795	0.52063	0.890657	TRINITY_DN75350_c1_g3_i2;TRINITY_DN94611_c6_g4_i1	http://amigo.geneontology.org/amigo/term/GO:0045491	BP	2
GO:0009789	positive regulation of abscisic acid-activated signaling pathway	2/740	51/21795	0.52063	0.890657	TRINITY_DN79488_c1_g6_i1;TRINITY_DN93473_c3_g1_i1	http://amigo.geneontology.org/amigo/term/GO:0009789	BP	2
GO:0001933	negative regulation of protein phosphorylation	2/740	51/21795	0.52063	0.890657	TRINITY_DN71557_c0_g1_i11;TRINITY_DN75913_c2_g1_i8	http://amigo.geneontology.org/amigo/term/GO:0001933	BP	2
GO:2000762	regulation of phenylpropanoid metabolic process	3/740	81/21795	0.522047	0.892057	TRINITY_DN74963_c1_g2_i1;TRINITY_DN86643_c1_g4_i3;TRINITY_DN86907_c3_g4_i3	http://amigo.geneontology.org/amigo/term/GO:2000762	BP	3
GO:0048638	regulation of developmental growth	8/740	230/21795	0.522688	0.892057	TRINITY_DN67020_c0_g1_i1;TRINITY_DN69048_c0_g1_i1;TRINITY_DN74039_c0_g2_i1;TRINITY_DN77570_c2_g2_i2;TRINITY_DN83197_c0_g1_i2;TRINITY_DN87382_c0_g1_i2;TRINITY_DN89084_c1_g2_i3;TRINITY_DN92298_c1_g5_i1	http://amigo.geneontology.org/amigo/term/GO:0048638	BP	8
GO:0007389	pattern specification process	25/740	735/21795	0.525643	0.894312	TRINITY_DN15130_c1_g1_i1;TRINITY_DN62427_c0_g1_i1;TRINITY_DN62693_c0_g1_i1;TRINITY_DN67876_c0_g1_i2;TRINITY_DN68559_c0_g1_i2;TRINITY_DN70135_c0_g2_i3;TRINITY_DN71772_c1_g1_i1;TRINITY_DN72838_c0_g1_i11;TRINITY_DN74399_c0_g2_i2;TRINITY_DN75355_c1_g1_i13;TRINITY_DN79601_c8_g1_i4;TRINITY_DN79780_c4_g2_i1;TRINITY_DN80567_c0_g6_i1;TRINITY_DN81011_c0_g2_i4;TRINITY_DN82731_c0_g4_i2;TRINITY_DN84005_c0_g1_…	http://amigo.geneontology.org/amigo/term/GO:0007389	BP	25
GO:0006302	double-strand break repair	4/740	112/21795	0.530319	0.897623	TRINITY_DN77207_c2_g1_i3;TRINITY_DN80224_c0_g2_i1;TRINITY_DN90242_c6_g1_i2;TRINITY_DN95884_c0_g1_i1	http://amigo.geneontology.org/amigo/term/GO:0006302	BP	4
GO:0043467	regulation of generation of precursor metabolites and energy	3/740	82/21795	0.530343	0.897623	TRINITY_DN75808_c2_g1_i1;TRINITY_DN95543_c0_g1_i1;TRINITY_DN95543_c1_g3_i1	http://amigo.geneontology.org/amigo/term/GO:0043467	BP	3
GO:0000578	embryonic axis specification	2/740	52/21795	0.531097	0.897623	TRINITY_DN81011_c0_g2_i4;TRINITY_DN89966_c3_g2_i2	http://amigo.geneontology.org/amigo/term/GO:0000578	BP	2
GO:0045893	positive regulation of transcription, DNA-templated	12/740	351/21795	0.531594	0.897623	TRINITY_DN62693_c0_g1_i1;TRINITY_DN65799_c0_g1_i3;TRINITY_DN68780_c0_g2_i2;TRINITY_DN68775_c1_g1_i1;TRINITY_DN69811_c0_g2_i1;TRINITY_DN72127_c0_g4_i3;TRINITY_DN73294_c5_g2_i2;TRINITY_DN73594_c1_g1_i2;TRINITY_DN81577_c0_g5_i2;TRINITY_DN83499_c1_g7_i1;TRINITY_DN86288_c3_g4_i1;TRINITY_DN93473_c3_g1_i1	http://amigo.geneontology.org/amigo/term/GO:0045893	BP	12
GO:0055002	striated muscle cell development	1/740	22/21795	0.532478	0.897623	TRINITY_DN94190_c2_g1_i20	http://amigo.geneontology.org/amigo/term/GO:0055002	BP	1
GO:0051307	meiotic chromosome separation	1/740	22/21795	0.532478	0.897623	TRINITY_DN90636_c0_g1_i7	http://amigo.geneontology.org/amigo/term/GO:0051307	BP	1
GO:0009937	regulation of gibberellic acid mediated signaling pathway	1/740	22/21795	0.532478	0.897623	TRINITY_DN57153_c0_g1_i1	http://amigo.geneontology.org/amigo/term/GO:0009937	BP	1
GO:0055001	muscle cell development	1/740	22/21795	0.532478	0.897623	TRINITY_DN94190_c2_g1_i20	http://amigo.geneontology.org/amigo/term/GO:0055001	BP	1
GO:0010411	xyloglucan metabolic process	1/740	22/21795	0.532478	0.897623	TRINITY_DN75350_c1_g3_i2	http://amigo.geneontology.org/amigo/term/GO:0010411	BP	1
GO:0043966	histone H3 acetylation	1/740	22/21795	0.532478	0.897623	TRINITY_DN78980_c2_g2_i3	http://amigo.geneontology.org/amigo/term/GO:0043966	BP	1
GO:0031571	mitotic G1 DNA damage checkpoint	1/740	22/21795	0.532478	0.897623	TRINITY_DN86288_c3_g4_i1	http://amigo.geneontology.org/amigo/term/GO:0031571	BP	1
GO:0071731	response to nitric oxide	1/740	22/21795	0.532478	0.897623	TRINITY_DN79971_c0_g2_i4	http://amigo.geneontology.org/amigo/term/GO:0071731	BP	1
GO:0044783	G1 DNA damage checkpoint	1/740	22/21795	0.532478	0.897623	TRINITY_DN86288_c3_g4_i1	http://amigo.geneontology.org/amigo/term/GO:0044783	BP	1
GO:0034661	ncRNA catabolic process	1/740	22/21795	0.532478	0.897623	TRINITY_DN81710_c1_g6_i1	http://amigo.geneontology.org/amigo/term/GO:0034661	BP	1
GO:0031935	regulation of chromatin silencing	1/740	22/21795	0.532478	0.897623	TRINITY_DN86284_c4_g7_i1	http://amigo.geneontology.org/amigo/term/GO:0031935	BP	1
GO:0000160	phosphorelay signal transduction system	6/740	173/21795	0.536882	0.90299	TRINITY_DN70682_c0_g1_i1;TRINITY_DN73594_c1_g1_i2;TRINITY_DN75000_c0_g2_i3;TRINITY_DN79602_c0_g1_i2;TRINITY_DN81627_c2_g1_i12;TRINITY_DN93265_c2_g2_i1	http://amigo.geneontology.org/amigo/term/GO:0000160	BP	6
GO:0032269	negative regulation of cellular protein metabolic process	5/740	143/21795	0.536913	0.90299	TRINITY_DN66001_c0_g1_i2;TRINITY_DN71557_c0_g1_i11;TRINITY_DN71772_c1_g1_i1;TRINITY_DN75913_c2_g1_i8;TRINITY_DN86288_c3_g4_i1	http://amigo.geneontology.org/amigo/term/GO:0032269	BP	5
GO:0034605	cellular response to heat	3/740	83/21795	0.538559	0.903509	TRINITY_DN72127_c0_g4_i3;TRINITY_DN89551_c1_g4_i2;TRINITY_DN89960_c2_g3_i2	http://amigo.geneontology.org/amigo/term/GO:0034605	BP	3
GO:0045017	glycerolipid biosynthetic process	3/740	83/21795	0.538559	0.903509	TRINITY_DN68864_c0_g1_i6;TRINITY_DN83157_c6_g4_i1;TRINITY_DN91267_c0_g4_i1	http://amigo.geneontology.org/amigo/term/GO:0045017	BP	3
GO:0071470	cellular response to osmotic stress	3/740	83/21795	0.538559	0.903509	TRINITY_DN81530_c0_g1_i6;TRINITY_DN81627_c2_g1_i12;TRINITY_DN81807_c4_g1_i3	http://amigo.geneontology.org/amigo/term/GO:0071470	BP	3
GO:0009887	animal organ morphogenesis	18/740	532/21795	0.540151	0.903696	TRINITY_DN62693_c0_g1_i1;TRINITY_DN67350_c0_g1_i1;TRINITY_DN70135_c0_g2_i3;TRINITY_DN71355_c0_g1_i1;TRINITY_DN71772_c1_g1_i1;TRINITY_DN72838_c0_g1_i11;TRINITY_DN73792_c0_g1_i3;TRINITY_DN74875_c0_g2_i3;TRINITY_DN75510_c0_g5_i4;TRINITY_DN78637_c1_g1_i3;TRINITY_DN80567_c0_g6_i1;TRINITY_DN83199_c1_g4_i2;TRINITY_DN85439_c1_g1_i2;TRINITY_DN85755_c0_g3_i1;TRINITY_DN90042_c0_g4_i2;TRINITY_DN92796_c5_g1_i…	http://amigo.geneontology.org/amigo/term/GO:0009887	BP	18
GO:1902275	regulation of chromatin organization	2/740	53/21795	0.541406	0.905271	TRINITY_DN66001_c0_g1_i2;TRINITY_DN80224_c0_g2_i1	http://amigo.geneontology.org/amigo/term/GO:1902275	BP	2
GO:0030258	lipid modification	7/740	204/21795	0.542315	0.906253	TRINITY_DN73792_c0_g1_i3;TRINITY_DN79971_c0_g2_i4;TRINITY_DN83157_c6_g4_i1;TRINITY_DN85439_c1_g1_i2;TRINITY_DN91192_c0_g11_i1;TRINITY_DN92028_c1_g2_i1;TRINITY_DN95812_c1_g1_i9	http://amigo.geneontology.org/amigo/term/GO:0030258	BP	7
GO:0031324	negative regulation of cellular metabolic process	24/740	712/21795	0.54444	0.906253	TRINITY_DN65780_c0_g1_i2;TRINITY_DN66001_c0_g1_i2;TRINITY_DN70682_c0_g1_i1;TRINITY_DN71200_c0_g1_i3;TRINITY_DN71557_c0_g1_i11;TRINITY_DN71772_c1_g1_i1;TRINITY_DN74039_c0_g2_i1;TRINITY_DN75808_c2_g1_i1;TRINITY_DN75913_c2_g1_i8;TRINITY_DN76437_c5_g2_i1;TRINITY_DN77139_c0_g2_i1;TRINITY_DN77139_c0_g3_i1;TRINITY_DN78441_c2_g1_i5;TRINITY_DN80593_c0_g6_i1;TRINITY_DN84109_c0_g2_i2;TRINITY_DN86288_c3_g4_i…	http://amigo.geneontology.org/amigo/term/GO:0031324	BP	24
GO:0006979	response to oxidative stress	29/740	861/21795	0.545232	0.906253	TRINITY_DN53892_c1_g1_i1;TRINITY_DN65523_c0_g1_i1;TRINITY_DN72144_c3_g1_i1;TRINITY_DN75152_c3_g2_i1;TRINITY_DN77590_c0_g5_i1;TRINITY_DN77590_c0_g8_i1;TRINITY_DN79343_c0_g1_i2;TRINITY_DN79715_c0_g6_i1;TRINITY_DN79971_c0_g2_i4;TRINITY_DN81892_c1_g7_i4;TRINITY_DN82464_c1_g1_i1;TRINITY_DN83839_c8_g4_i1;TRINITY_DN84755_c2_g5_i3;TRINITY_DN86638_c3_g6_i2;TRINITY_DN86753_c2_g7_i1;TRINITY_DN87313_c1_g1_i9…	http://amigo.geneontology.org/amigo/term/GO:0006979	BP	29
GO:0009934	regulation of meristem structural organization	3/740	84/21795	0.546691	0.906253	TRINITY_DN72421_c2_g4_i3;TRINITY_DN89084_c1_g2_i3;TRINITY_DN92298_c1_g5_i1	http://amigo.geneontology.org/amigo/term/GO:0009934	BP	3
GO:0031328	positive regulation of cellular biosynthetic process	14/740	415/21795	0.548179	0.906253	TRINITY_DN62693_c0_g1_i1;TRINITY_DN65799_c0_g1_i3;TRINITY_DN68780_c0_g2_i2;TRINITY_DN68775_c1_g1_i1;TRINITY_DN69811_c0_g2_i1;TRINITY_DN70602_c0_g2_i1;TRINITY_DN72127_c0_g4_i3;TRINITY_DN73294_c5_g2_i2;TRINITY_DN73594_c1_g1_i2;TRINITY_DN79180_c4_g2_i1;TRINITY_DN81577_c0_g5_i2;TRINITY_DN83499_c1_g7_i1;TRINITY_DN86288_c3_g4_i1;TRINITY_DN93473_c3_g1_i1	http://amigo.geneontology.org/amigo/term/GO:0031328	BP	14
GO:0046417	chorismate metabolic process	1/740	23/21795	0.548367	0.906253	TRINITY_DN81835_c2_g1_i3	http://amigo.geneontology.org/amigo/term/GO:0046417	BP	1
GO:0001745	compound eye morphogenesis	1/740	23/21795	0.548367	0.906253	TRINITY_DN71772_c1_g1_i1	http://amigo.geneontology.org/amigo/term/GO:0001745	BP	1
GO:0006783	heme biosynthetic process	1/740	23/21795	0.548367	0.906253	TRINITY_DN79615_c0_g4_i2	http://amigo.geneontology.org/amigo/term/GO:0006783	BP	1
GO:0048871	multicellular organismal homeostasis	1/740	23/21795	0.548367	0.906253	TRINITY_DN86288_c3_g4_i1	http://amigo.geneontology.org/amigo/term/GO:0048871	BP	1
GO:0010268	brassinosteroid homeostasis	1/740	23/21795	0.548367	0.906253	TRINITY_DN90264_c0_g4_i2	http://amigo.geneontology.org/amigo/term/GO:0010268	BP	1
GO:0002229	defense response to oomycetes	1/740	23/21795	0.548367	0.906253	TRINITY_DN73594_c1_g1_i2	http://amigo.geneontology.org/amigo/term/GO:0002229	BP	1
GO:0002474	antigen processing and presentation of peptide antigen via MHC class I	1/740	23/21795	0.548367	0.906253	TRINITY_DN86288_c3_g4_i1	http://amigo.geneontology.org/amigo/term/GO:0002474	BP	1
GO:0030968	endoplasmic reticulum unfolded protein response	1/740	23/21795	0.548367	0.906253	TRINITY_DN69285_c0_g1_i1	http://amigo.geneontology.org/amigo/term/GO:0030968	BP	1
GO:0042873	aldonate transport	1/740	23/21795	0.548367	0.906253	TRINITY_DN91981_c0_g3_i2	http://amigo.geneontology.org/amigo/term/GO:0042873	BP	1
GO:0030437	ascospore formation	1/740	23/21795	0.548367	0.906253	TRINITY_DN75000_c0_g2_i3	http://amigo.geneontology.org/amigo/term/GO:0030437	BP	1
GO:0001817	regulation of cytokine production	1/740	23/21795	0.548367	0.906253	TRINITY_DN86288_c3_g4_i1	http://amigo.geneontology.org/amigo/term/GO:0001817	BP	1
GO:0019372	lipoxygenase pathway	1/740	23/21795	0.548367	0.906253	TRINITY_DN71562_c3_g1_i1	http://amigo.geneontology.org/amigo/term/GO:0019372	BP	1
GO:0044283	small molecule biosynthetic process	44/740	1308/21795	0.548587	0.906253	TRINITY_DN43850_c0_g1_i1;TRINITY_DN49697_c0_g1_i1;TRINITY_DN63938_c0_g1_i1;TRINITY_DN66170_c0_g1_i1;TRINITY_DN68223_c0_g1_i1;TRINITY_DN69285_c0_g1_i1;TRINITY_DN69553_c0_g1_i1;TRINITY_DN70511_c0_g2_i2;TRINITY_DN71012_c0_g1_i1;TRINITY_DN71536_c0_g1_i2;TRINITY_DN71536_c0_g2_i4;TRINITY_DN71723_c2_g1_i1;TRINITY_DN72083_c0_g1_i4;TRINITY_DN72971_c0_g1_i3;TRINITY_DN73326_c0_g1_i1;TRINITY_DN73326_c0_g3_i3…	http://amigo.geneontology.org/amigo/term/GO:0044283	BP	44
GO:0006810	transport	108/740	3204/21795	0.549445	0.907149	TRINITY_DN58320_c0_g2_i1;TRINITY_DN66246_c0_g1_i1;TRINITY_DN67293_c0_g1_i2;TRINITY_DN67443_c0_g1_i2;TRINITY_DN68107_c0_g1_i1;TRINITY_DN68282_c0_g1_i1;TRINITY_DN69022_c0_g1_i1;TRINITY_DN69901_c0_g2_i2;TRINITY_DN70458_c1_g1_i2;TRINITY_DN70525_c3_g2_i1;TRINITY_DN70640_c1_g1_i2;TRINITY_DN70801_c0_g1_i6;TRINITY_DN70801_c0_g2_i1;TRINITY_DN70887_c0_g1_i2;TRINITY_DN71157_c0_g3_i1;TRINITY_DN71274_c2_g1_i2…	http://amigo.geneontology.org/amigo/term/GO:0006810	BP	108
GO:0019760	glucosinolate metabolic process	4/740	115/21795	0.551262	0.90833	TRINITY_DN67629_c0_g1_i1;TRINITY_DN86907_c3_g4_i3;TRINITY_DN88582_c7_g2_i10;TRINITY_DN123479_c0_g1_i1	http://amigo.geneontology.org/amigo/term/GO:0019760	BP	4
GO:0009072	aromatic amino acid family metabolic process	4/740	115/21795	0.551262	0.90833	TRINITY_DN72971_c0_g1_i3;TRINITY_DN81835_c2_g1_i3;TRINITY_DN82036_c3_g1_i3;TRINITY_DN91527_c3_g4_i1	http://amigo.geneontology.org/amigo/term/GO:0009072	BP	4
GO:0060249	anatomical structure homeostasis	2/740	54/21795	0.551557	0.90833	TRINITY_DN79180_c4_g2_i1;TRINITY_DN80593_c0_g6_i1	http://amigo.geneontology.org/amigo/term/GO:0060249	BP	2
GO:0043603	cellular amide metabolic process	6/740	176/21795	0.553756	0.910602	TRINITY_DN71723_c2_g1_i1;TRINITY_DN72908_c0_g1_i9;TRINITY_DN81698_c0_g3_i1;TRINITY_DN88582_c7_g2_i10;TRINITY_DN92577_c0_g1_i5;TRINITY_DN114980_c0_g1_i1	http://amigo.geneontology.org/amigo/term/GO:0043603	BP	6
GO:0048827	phyllome development	40/740	1192/21795	0.554672	0.910602	TRINITY_DN67047_c0_g1_i1;TRINITY_DN67350_c0_g1_i1;TRINITY_DN68418_c0_g1_i1;TRINITY_DN70135_c0_g2_i3;TRINITY_DN71355_c0_g1_i1;TRINITY_DN72627_c2_g1_i3;TRINITY_DN72765_c0_g1_i1;TRINITY_DN74875_c0_g2_i3;TRINITY_DN75227_c1_g3_i8;TRINITY_DN76233_c0_g1_i1;TRINITY_DN77419_c0_g1_i10;TRINITY_DN78300_c2_g8_i1;TRINITY_DN79255_c2_g3_i2;TRINITY_DN79780_c4_g2_i1;TRINITY_DN80331_c0_g6_i1;TRINITY_DN81281_c4_g1_i…	http://amigo.geneontology.org/amigo/term/GO:0048827	BP	40
GO:0055114	oxidation-reduction process	67/740	1995/21795	0.557305	0.913853	TRINITY_DN49697_c0_g1_i1;TRINITY_DN63938_c0_g1_i1;TRINITY_DN64333_c0_g1_i2;TRINITY_DN67401_c0_g4_i1;TRINITY_DN70511_c0_g2_i2;TRINITY_DN70600_c0_g1_i1;TRINITY_DN71247_c1_g1_i1;TRINITY_DN71536_c0_g1_i2;TRINITY_DN71536_c0_g2_i4;TRINITY_DN72482_c0_g2_i1;TRINITY_DN72627_c2_g1_i3;TRINITY_DN72895_c3_g2_i4;TRINITY_DN73326_c0_g1_i1;TRINITY_DN73326_c0_g3_i3;TRINITY_DN73481_c7_g1_i1;TRINITY_DN73693_c0_g3_i2…	http://amigo.geneontology.org/amigo/term/GO:0055114	BP	67
GO:0048481	plant ovule development	4/740	116/21795	0.558133	0.913983	TRINITY_DN67047_c0_g1_i1;TRINITY_DN72765_c0_g1_i1;TRINITY_DN76233_c0_g1_i1;TRINITY_DN81281_c4_g1_i1	http://amigo.geneontology.org/amigo/term/GO:0048481	BP	4
GO:0042326	negative regulation of phosphorylation	2/740	55/21795	0.561549	0.913983	TRINITY_DN71557_c0_g1_i11;TRINITY_DN75913_c2_g1_i8	http://amigo.geneontology.org/amigo/term/GO:0042326	BP	2
GO:0006623	protein targeting to vacuole	3/740	86/21795	0.562702	0.913983	TRINITY_DN74186_c0_g1_i3;TRINITY_DN81011_c0_g2_i4;TRINITY_DN82697_c2_g3_i1	http://amigo.geneontology.org/amigo/term/GO:0006623	BP	3
GO:0072666	establishment of protein localization to vacuole	3/740	86/21795	0.562702	0.913983	TRINITY_DN74186_c0_g1_i3;TRINITY_DN81011_c0_g2_i4;TRINITY_DN82697_c2_g3_i1	http://amigo.geneontology.org/amigo/term/GO:0072666	BP	3
GO:0031397	negative regulation of protein ubiquitination	1/740	24/21795	0.563718	0.913983	TRINITY_DN86288_c3_g4_i1	http://amigo.geneontology.org/amigo/term/GO:0031397	BP	1
GO:2000134	negative regulation of G1/S transition of mitotic cell cycle	1/740	24/21795	0.563718	0.913983	TRINITY_DN86288_c3_g4_i1	http://amigo.geneontology.org/amigo/term/GO:2000134	BP	1
GO:0042178	xenobiotic catabolic process	1/740	24/21795	0.563718	0.913983	TRINITY_DN94204_c0_g1_i3	http://amigo.geneontology.org/amigo/term/GO:0042178	BP	1
GO:2001020	regulation of response to DNA damage stimulus	1/740	24/21795	0.563718	0.913983	TRINITY_DN80224_c0_g2_i1	http://amigo.geneontology.org/amigo/term/GO:2001020	BP	1
GO:0006308	DNA catabolic process	1/740	24/21795	0.563718	0.913983	TRINITY_DN80224_c0_g2_i1	http://amigo.geneontology.org/amigo/term/GO:0006308	BP	1
GO:0060541	respiratory system development	1/740	24/21795	0.563718	0.913983	TRINITY_DN69073_c2_g1_i1	http://amigo.geneontology.org/amigo/term/GO:0060541	BP	1
GO:0051146	striated muscle cell differentiation	1/740	24/21795	0.563718	0.913983	TRINITY_DN94190_c2_g1_i20	http://amigo.geneontology.org/amigo/term/GO:0051146	BP	1
GO:0010337	regulation of salicylic acid metabolic process	1/740	24/21795	0.563718	0.913983	TRINITY_DN94882_c0_g4_i1	http://amigo.geneontology.org/amigo/term/GO:0010337	BP	1
GO:0071453	cellular response to oxygen levels	1/740	24/21795	0.563718	0.913983	TRINITY_DN86288_c3_g4_i1	http://amigo.geneontology.org/amigo/term/GO:0071453	BP	1
GO:0007266	Rho protein signal transduction	1/740	24/21795	0.563718	0.913983	TRINITY_DN218260_c0_g1_i1	http://amigo.geneontology.org/amigo/term/GO:0007266	BP	1
GO:0006098	pentose-phosphate shunt	1/740	24/21795	0.563718	0.913983	TRINITY_DN72895_c3_g2_i4	http://amigo.geneontology.org/amigo/term/GO:0006098	BP	1
GO:0036294	cellular response to decreased oxygen levels	1/740	24/21795	0.563718	0.913983	TRINITY_DN86288_c3_g4_i1	http://amigo.geneontology.org/amigo/term/GO:0036294	BP	1
GO:0045454	cell redox homeostasis	1/740	24/21795	0.563718	0.913983	TRINITY_DN90204_c2_g3_i5	http://amigo.geneontology.org/amigo/term/GO:0045454	BP	1
GO:0009657	plastid organization	12/740	360/21795	0.567158	0.917934	TRINITY_DN65799_c0_g1_i3;TRINITY_DN71317_c1_g1_i3;TRINITY_DN71954_c3_g8_i3;TRINITY_DN77953_c1_g1_i1;TRINITY_DN79458_c0_g1_i8;TRINITY_DN81011_c0_g2_i4;TRINITY_DN81632_c1_g4_i2;TRINITY_DN83199_c1_g4_i2;TRINITY_DN84703_c6_g1_i1;TRINITY_DN87241_c2_g1_i1;TRINITY_DN92530_c0_g2_i4;TRINITY_DN97059_c7_g1_i1	http://amigo.geneontology.org/amigo/term/GO:0009657	BP	12
GO:0006811	ion transport	44/740	1317/21795	0.567496	0.917934	TRINITY_DN67293_c0_g1_i2;TRINITY_DN67443_c0_g1_i2;TRINITY_DN70525_c3_g2_i1;TRINITY_DN70887_c0_g1_i2;TRINITY_DN71157_c0_g3_i1;TRINITY_DN72170_c3_g8_i1;TRINITY_DN72170_c3_g9_i1;TRINITY_DN73821_c5_g2_i1;TRINITY_DN74250_c0_g1_i1;TRINITY_DN74807_c2_g1_i3;TRINITY_DN76473_c8_g1_i2;TRINITY_DN76628_c0_g1_i1;TRINITY_DN78735_c0_g6_i4;TRINITY_DN79326_c0_g1_i1;TRINITY_DN79540_c0_g3_i4;TRINITY_DN80116_c1_g2_i8…	http://amigo.geneontology.org/amigo/term/GO:0006811	BP	44
GO:0009832	plant-type cell wall biogenesis	7/740	209/21795	0.568063	0.917934	TRINITY_DN68815_c0_g1_i1;TRINITY_DN70951_c0_g1_i9;TRINITY_DN74169_c0_g7_i1;TRINITY_DN83499_c1_g7_i1;TRINITY_DN87396_c1_g3_i1;TRINITY_DN87396_c1_g2_i6;TRINITY_DN92693_c1_g2_i3	http://amigo.geneontology.org/amigo/term/GO:0009832	BP	7
GO:0072665	protein localization to vacuole	3/740	87/21795	0.570577	0.918665	TRINITY_DN74186_c0_g1_i3;TRINITY_DN81011_c0_g2_i4;TRINITY_DN82697_c2_g3_i1	http://amigo.geneontology.org/amigo/term/GO:0072665	BP	3
GO:2000030	regulation of response to red or far red light	2/740	56/21795	0.57138	0.918665	TRINITY_DN65230_c0_g2_i1;TRINITY_DN88382_c0_g2_i1	http://amigo.geneontology.org/amigo/term/GO:2000030	BP	2
GO:0006349	regulation of gene expression by genetic imprinting	2/740	56/21795	0.57138	0.918665	TRINITY_DN76957_c0_g4_i4;TRINITY_DN95457_c5_g4_i1	http://amigo.geneontology.org/amigo/term/GO:0006349	BP	2
GO:0016554	cytidine to uridine editing	2/740	56/21795	0.57138	0.918665	TRINITY_DN80840_c1_g2_i3;TRINITY_DN85168_c0_g2_i3	http://amigo.geneontology.org/amigo/term/GO:0016554	BP	2
GO:0071514	genetic imprinting	2/740	56/21795	0.57138	0.918665	TRINITY_DN76957_c0_g4_i4;TRINITY_DN95457_c5_g4_i1	http://amigo.geneontology.org/amigo/term/GO:0071514	BP	2
GO:0030036	actin cytoskeleton organization	4/740	118/21795	0.571703	0.918672	TRINITY_DN74764_c2_g1_i1;TRINITY_DN75000_c0_g2_i3;TRINITY_DN94190_c2_g1_i20;TRINITY_DN95483_c2_g1_i3	http://amigo.geneontology.org/amigo/term/GO:0030036	BP	4
GO:0031325	positive regulation of cellular metabolic process	17/740	512/21795	0.572536	0.919496	TRINITY_DN62693_c0_g1_i1;TRINITY_DN65799_c0_g1_i3;TRINITY_DN66001_c0_g1_i2;TRINITY_DN68780_c0_g2_i2;TRINITY_DN68775_c1_g1_i1;TRINITY_DN68815_c0_g1_i1;TRINITY_DN69811_c0_g2_i1;TRINITY_DN70602_c0_g2_i1;TRINITY_DN72127_c0_g4_i3;TRINITY_DN73294_c5_g2_i2;TRINITY_DN73594_c1_g1_i2;TRINITY_DN79180_c4_g2_i1;TRINITY_DN80224_c0_g2_i1;TRINITY_DN81577_c0_g5_i2;TRINITY_DN83499_c1_g7_i1;TRINITY_DN86288_c3_g4_i1…	http://amigo.geneontology.org/amigo/term/GO:0031325	BP	17
GO:0048588	developmental cell growth	10/740	301/21795	0.572853	0.919496	TRINITY_DN67782_c0_g1_i1;TRINITY_DN73484_c2_g1_i1;TRINITY_DN80415_c4_g1_i1;TRINITY_DN81327_c0_g2_i2;TRINITY_DN82276_c1_g3_i1;TRINITY_DN82530_c2_g2_i2;TRINITY_DN83527_c3_g5_i1;TRINITY_DN84843_c0_g1_i5;TRINITY_DN90446_c3_g2_i3;TRINITY_DN90446_c3_g4_i1	http://amigo.geneontology.org/amigo/term/GO:0048588	BP	10
GO:0006508	proteolysis	16/740	483/21795	0.576149	0.923499	TRINITY_DN71772_c1_g1_i1;TRINITY_DN72570_c0_g1_i6;TRINITY_DN74875_c0_g2_i3;TRINITY_DN75205_c1_g6_i1;TRINITY_DN76249_c2_g1_i6;TRINITY_DN76437_c5_g2_i1;TRINITY_DN77139_c0_g2_i1;TRINITY_DN77139_c0_g3_i1;TRINITY_DN80224_c0_g2_i1;TRINITY_DN85716_c0_g1_i22;TRINITY_DN86288_c3_g4_i1;TRINITY_DN88013_c3_g8_i1;TRINITY_DN89072_c0_g1_i1;TRINITY_DN90238_c5_g3_i3;TRINITY_DN92311_c0_g4_i4;TRINITY_DN95963_c2_g3_i2	http://amigo.geneontology.org/amigo/term/GO:0006508	BP	16
GO:0051049	regulation of transport	7/740	211/21795	0.578174	0.923499	TRINITY_DN74828_c0_g1_i1;TRINITY_DN75000_c0_g2_i3;TRINITY_DN77570_c2_g2_i2;TRINITY_DN79998_c5_g2_i1;TRINITY_DN80442_c2_g1_i2;TRINITY_DN84843_c0_g1_i5;TRINITY_DN87035_c0_g1_i6	http://amigo.geneontology.org/amigo/term/GO:0051049	BP	7
GO:0030587	sorocarp development	3/740	88/21795	0.578364	0.923499	TRINITY_DN43850_c0_g1_i1;TRINITY_DN89325_c2_g2_i6;TRINITY_DN96126_c2_g4_i3	http://amigo.geneontology.org/amigo/term/GO:0030587	BP	3
GO:0043935	sexual sporulation resulting in formation of a cellular spore	1/740	25/21795	0.578547	0.923499	TRINITY_DN75000_c0_g2_i3	http://amigo.geneontology.org/amigo/term/GO:0043935	BP	1
GO:0048446	petal morphogenesis	1/740	25/21795	0.578547	0.923499	TRINITY_DN90042_c0_g4_i2	http://amigo.geneontology.org/amigo/term/GO:0048446	BP	1
GO:0007231	osmosensory signaling pathway	1/740	25/21795	0.578547	0.923499	TRINITY_DN81627_c2_g1_i12	http://amigo.geneontology.org/amigo/term/GO:0007231	BP	1
GO:0097501	stress response to metal ion	1/740	25/21795	0.578547	0.923499	TRINITY_DN79447_c3_g1_i1	http://amigo.geneontology.org/amigo/term/GO:0097501	BP	1
GO:2000045	regulation of G1/S transition of mitotic cell cycle	1/740	25/21795	0.578547	0.923499	TRINITY_DN86288_c3_g4_i1	http://amigo.geneontology.org/amigo/term/GO:2000045	BP	1
GO:0010042	response to manganese ion	1/740	25/21795	0.578547	0.923499	TRINITY_DN90136_c5_g5_i2	http://amigo.geneontology.org/amigo/term/GO:0010042	BP	1
GO:0031032	actomyosin structure organization	1/740	25/21795	0.578547	0.923499	TRINITY_DN94190_c2_g1_i20	http://amigo.geneontology.org/amigo/term/GO:0031032	BP	1
GO:0051248	negative regulation of protein metabolic process	5/740	150/21795	0.579551	0.92459	TRINITY_DN66001_c0_g1_i2;TRINITY_DN71557_c0_g1_i11;TRINITY_DN71772_c1_g1_i1;TRINITY_DN75913_c2_g1_i8;TRINITY_DN86288_c3_g4_i1	http://amigo.geneontology.org/amigo/term/GO:0051248	BP	5
GO:0055072	iron ion homeostasis	2/740	57/21795	0.581051	0.926471	TRINITY_DN68418_c0_g1_i1;TRINITY_DN70640_c1_g1_i2	http://amigo.geneontology.org/amigo/term/GO:0055072	BP	2
GO:0048437	floral organ development	14/740	425/21795	0.5843	0.928305	TRINITY_DN62693_c0_g1_i1;TRINITY_DN67047_c0_g1_i1;TRINITY_DN67350_c0_g1_i1;TRINITY_DN71355_c0_g1_i1;TRINITY_DN72627_c2_g1_i3;TRINITY_DN72765_c0_g1_i1;TRINITY_DN76233_c0_g1_i1;TRINITY_DN81281_c4_g1_i1;TRINITY_DN83499_c1_g7_i1;TRINITY_DN83523_c1_g2_i2;TRINITY_DN89084_c1_g2_i3;TRINITY_DN89850_c5_g1_i3;TRINITY_DN90042_c0_g4_i2;TRINITY_DN92796_c5_g1_i1	http://amigo.geneontology.org/amigo/term/GO:0048437	BP	14
GO:0009817	defense response to fungus, incompatible interaction	4/740	120/21795	0.585037	0.928305	TRINITY_DN77891_c0_g1_i1;TRINITY_DN77891_c1_g1_i5;TRINITY_DN86907_c3_g4_i3;TRINITY_DN91900_c4_g1_i3	http://amigo.geneontology.org/amigo/term/GO:0009817	BP	4
GO:0090351	seedling development	5/740	151/21795	0.58547	0.928305	TRINITY_DN67782_c0_g1_i1;TRINITY_DN67970_c1_g1_i1;TRINITY_DN69497_c0_g1_i2;TRINITY_DN81512_c2_g2_i1;TRINITY_DN84314_c0_g2_i9	http://amigo.geneontology.org/amigo/term/GO:0090351	BP	5
GO:0051247	positive regulation of protein metabolic process	5/740	151/21795	0.58547	0.928305	TRINITY_DN65799_c0_g1_i3;TRINITY_DN66001_c0_g1_i2;TRINITY_DN73594_c1_g1_i2;TRINITY_DN80224_c0_g2_i1;TRINITY_DN86288_c3_g4_i1	http://amigo.geneontology.org/amigo/term/GO:0051247	BP	5
GO:0048440	carpel development	5/740	151/21795	0.58547	0.928305	TRINITY_DN67047_c0_g1_i1;TRINITY_DN72627_c2_g1_i3;TRINITY_DN72765_c0_g1_i1;TRINITY_DN76233_c0_g1_i1;TRINITY_DN81281_c4_g1_i1	http://amigo.geneontology.org/amigo/term/GO:0048440	BP	5
GO:0050826	response to freezing	3/740	89/21795	0.586061	0.928305	TRINITY_DN72127_c0_g4_i3;TRINITY_DN79912_c3_g6_i1;TRINITY_DN94882_c0_g4_i1	http://amigo.geneontology.org/amigo/term/GO:0050826	BP	3
GO:0016571	histone methylation	3/740	89/21795	0.586061	0.928305	TRINITY_DN80593_c0_g6_i1;TRINITY_DN89640_c2_g2_i2;TRINITY_DN93466_c1_g3_i1	http://amigo.geneontology.org/amigo/term/GO:0016571	BP	3
GO:0071214	cellular response to abiotic stimulus	9/740	274/21795	0.587452	0.929489	TRINITY_DN71317_c1_g1_i3;TRINITY_DN72144_c3_g1_i1;TRINITY_DN73152_c1_g3_i1;TRINITY_DN81530_c0_g1_i6;TRINITY_DN81627_c2_g1_i12;TRINITY_DN81807_c4_g1_i3;TRINITY_DN83199_c1_g4_i2;TRINITY_DN84205_c2_g1_i2;TRINITY_DN88382_c0_g2_i1	http://amigo.geneontology.org/amigo/term/GO:0071214	BP	9
GO:0022603	regulation of anatomical structure morphogenesis	10/740	305/21795	0.589653	0.929639	TRINITY_DN69048_c0_g1_i1;TRINITY_DN70640_c1_g1_i2;TRINITY_DN72421_c2_g4_i3;TRINITY_DN74039_c0_g2_i1;TRINITY_DN77570_c2_g2_i2;TRINITY_DN87382_c0_g1_i2;TRINITY_DN89084_c1_g2_i3;TRINITY_DN92298_c1_g5_i1;TRINITY_DN94190_c2_g1_i20;TRINITY_DN218260_c0_g1_i1	http://amigo.geneontology.org/amigo/term/GO:0022603	BP	10
GO:0009118	regulation of nucleoside metabolic process	2/740	58/21795	0.590559	0.929639	TRINITY_DN90953_c2_g2_i3;TRINITY_DN218260_c0_g1_i1	http://amigo.geneontology.org/amigo/term/GO:0009118	BP	2
GO:0006814	sodium ion transport	2/740	58/21795	0.590559	0.929639	TRINITY_DN81530_c0_g1_i6;TRINITY_DN81807_c4_g1_i3	http://amigo.geneontology.org/amigo/term/GO:0006814	BP	2
GO:0072331	signal transduction by p53 class mediator	1/740	26/21795	0.592873	0.929639	TRINITY_DN86288_c3_g4_i1	http://amigo.geneontology.org/amigo/term/GO:0072331	BP	1
GO:0051304	chromosome separation	1/740	26/21795	0.592873	0.929639	TRINITY_DN90636_c0_g1_i7	http://amigo.geneontology.org/amigo/term/GO:0051304	BP	1
GO:0042775	mitochondrial ATP synthesis coupled electron transport	1/740	26/21795	0.592873	0.929639	TRINITY_DN79715_c0_g6_i1	http://amigo.geneontology.org/amigo/term/GO:0042775	BP	1
GO:0000086	G2/M transition of mitotic cell cycle	1/740	26/21795	0.592873	0.929639	TRINITY_DN72421_c2_g4_i3	http://amigo.geneontology.org/amigo/term/GO:0000086	BP	1
GO:0042762	regulation of sulfur metabolic process	1/740	26/21795	0.592873	0.929639	TRINITY_DN70602_c0_g2_i1	http://amigo.geneontology.org/amigo/term/GO:0042762	BP	1
GO:0071156	regulation of cell cycle arrest	1/740	26/21795	0.592873	0.929639	TRINITY_DN86288_c3_g4_i1	http://amigo.geneontology.org/amigo/term/GO:0071156	BP	1
GO:0030162	regulation of proteolysis	1/740	26/21795	0.592873	0.929639	TRINITY_DN71772_c1_g1_i1	http://amigo.geneontology.org/amigo/term/GO:0030162	BP	1
GO:0019079	viral genome replication	1/740	26/21795	0.592873	0.929639	TRINITY_DN74352_c11_g3_i3	http://amigo.geneontology.org/amigo/term/GO:0019079	BP	1
GO:0016925	protein sumoylation	1/740	26/21795	0.592873	0.929639	TRINITY_DN94882_c0_g4_i1	http://amigo.geneontology.org/amigo/term/GO:0016925	BP	1
GO:0090333	regulation of stomatal closure	1/740	26/21795	0.592873	0.929639	TRINITY_DN84843_c0_g1_i5	http://amigo.geneontology.org/amigo/term/GO:0090333	BP	1
GO:0010047	fruit dehiscence	1/740	26/21795	0.592873	0.929639	TRINITY_DN83499_c1_g7_i1	http://amigo.geneontology.org/amigo/term/GO:0010047	BP	1
GO:0010044	response to aluminum ion	1/740	26/21795	0.592873	0.929639	TRINITY_DN84932_c0_g1_i4	http://amigo.geneontology.org/amigo/term/GO:0010044	BP	1
GO:0019761	glucosinolate biosynthetic process	1/740	26/21795	0.592873	0.929639	TRINITY_DN67629_c0_g1_i1	http://amigo.geneontology.org/amigo/term/GO:0019761	BP	1
GO:0048193	Golgi vesicle transport	3/740	90/21795	0.593668	0.929639	TRINITY_DN75000_c0_g2_i3;TRINITY_DN82697_c2_g3_i1;TRINITY_DN86583_c0_g3_i1	http://amigo.geneontology.org/amigo/term/GO:0048193	BP	3
GO:0030582	reproductive fruiting body development	3/740	90/21795	0.593668	0.929639	TRINITY_DN43850_c0_g1_i1;TRINITY_DN89325_c2_g2_i6;TRINITY_DN96126_c2_g4_i3	http://amigo.geneontology.org/amigo/term/GO:0030582	BP	3
GO:1901990	regulation of mitotic cell cycle phase transition	3/740	90/21795	0.593668	0.929639	TRINITY_DN72421_c2_g4_i3;TRINITY_DN85106_c2_g3_i3;TRINITY_DN86288_c3_g4_i1	http://amigo.geneontology.org/amigo/term/GO:1901990	BP	3
GO:0051234	establishment of localization	108/740	3237/21795	0.595657	0.930507	TRINITY_DN58320_c0_g2_i1;TRINITY_DN66246_c0_g1_i1;TRINITY_DN67293_c0_g1_i2;TRINITY_DN67443_c0_g1_i2;TRINITY_DN68107_c0_g1_i1;TRINITY_DN68282_c0_g1_i1;TRINITY_DN69022_c0_g1_i1;TRINITY_DN69901_c0_g2_i2;TRINITY_DN70458_c1_g1_i2;TRINITY_DN70525_c3_g2_i1;TRINITY_DN70640_c1_g1_i2;TRINITY_DN70801_c0_g1_i6;TRINITY_DN70801_c0_g2_i1;TRINITY_DN70887_c0_g1_i2;TRINITY_DN71157_c0_g3_i1;TRINITY_DN71274_c2_g1_i2…	http://amigo.geneontology.org/amigo/term/GO:0051234	BP	108
GO:0010118	stomatal movement	5/740	153/21795	0.597171	0.930507	TRINITY_DN69022_c0_g1_i1;TRINITY_DN72290_c0_g2_i2;TRINITY_DN76473_c8_g1_i2;TRINITY_DN82498_c1_g1_i6;TRINITY_DN93791_c4_g1_i3	http://amigo.geneontology.org/amigo/term/GO:0010118	BP	5
GO:0051052	regulation of DNA metabolic process	6/740	184/21795	0.5973	0.930507	TRINITY_DN76437_c5_g2_i1;TRINITY_DN77139_c0_g2_i1;TRINITY_DN77139_c0_g3_i1;TRINITY_DN79180_c4_g2_i1;TRINITY_DN80224_c0_g2_i1;TRINITY_DN88013_c3_g8_i1	http://amigo.geneontology.org/amigo/term/GO:0051052	BP	6
GO:0010628	positive regulation of gene expression	12/740	368/21795	0.597847	0.930507	TRINITY_DN62693_c0_g1_i1;TRINITY_DN65799_c0_g1_i3;TRINITY_DN68780_c0_g2_i2;TRINITY_DN68775_c1_g1_i1;TRINITY_DN69811_c0_g2_i1;TRINITY_DN72127_c0_g4_i3;TRINITY_DN73294_c5_g2_i2;TRINITY_DN73594_c1_g1_i2;TRINITY_DN81577_c0_g5_i2;TRINITY_DN83499_c1_g7_i1;TRINITY_DN86288_c3_g4_i1;TRINITY_DN93473_c3_g1_i1	http://amigo.geneontology.org/amigo/term/GO:0010628	BP	12
GO:0010218	response to far red light	4/740	122/21795	0.598126	0.930507	TRINITY_DN58158_c0_g1_i1;TRINITY_DN70135_c0_g2_i3;TRINITY_DN81851_c0_g2_i8;TRINITY_DN92166_c1_g1_i1	http://amigo.geneontology.org/amigo/term/GO:0010218	BP	4
GO:0010540	basipetal auxin transport	4/740	122/21795	0.598126	0.930507	TRINITY_DN85778_c2_g7_i1;TRINITY_DN90446_c3_g2_i3;TRINITY_DN90446_c3_g4_i1;TRINITY_DN92713_c1_g5_i1	http://amigo.geneontology.org/amigo/term/GO:0010540	BP	4
GO:0045892	negative regulation of transcription, DNA-templated	14/740	429/21795	0.598413	0.930507	TRINITY_DN65780_c0_g1_i2;TRINITY_DN70682_c0_g1_i1;TRINITY_DN71200_c0_g1_i3;TRINITY_DN71772_c1_g1_i1;TRINITY_DN74039_c0_g2_i1;TRINITY_DN78441_c2_g1_i5;TRINITY_DN80593_c0_g6_i1;TRINITY_DN84109_c0_g2_i2;TRINITY_DN86288_c3_g4_i1;TRINITY_DN88654_c0_g2_i8;TRINITY_DN88658_c1_g3_i5;TRINITY_DN92454_c3_g1_i1;TRINITY_DN93466_c1_g3_i1;TRINITY_DN94696_c0_g7_i1	http://amigo.geneontology.org/amigo/term/GO:0045892	BP	14
GO:0045860	positive regulation of protein kinase activity	2/740	59/21795	0.599906	0.932326	TRINITY_DN73594_c1_g1_i2;TRINITY_DN86288_c3_g4_i1	http://amigo.geneontology.org/amigo/term/GO:0045860	BP	2
GO:0031399	regulation of protein modification process	7/740	216/21795	0.60294	0.936032	TRINITY_DN66001_c0_g1_i2;TRINITY_DN71557_c0_g1_i11;TRINITY_DN73594_c1_g1_i2;TRINITY_DN75913_c2_g1_i8;TRINITY_DN79488_c1_g6_i1;TRINITY_DN80224_c0_g2_i1;TRINITY_DN86288_c3_g4_i1	http://amigo.geneontology.org/amigo/term/GO:0031399	BP	7
GO:0009890	negative regulation of biosynthetic process	17/740	522/21795	0.604746	0.936515	TRINITY_DN65780_c0_g1_i2;TRINITY_DN70682_c0_g1_i1;TRINITY_DN71200_c0_g1_i3;TRINITY_DN71772_c1_g1_i1;TRINITY_DN74039_c0_g2_i1;TRINITY_DN76557_c0_g2_i4;TRINITY_DN76557_c0_g5_i1;TRINITY_DN78441_c2_g1_i5;TRINITY_DN80593_c0_g6_i1;TRINITY_DN84109_c0_g2_i2;TRINITY_DN86288_c3_g4_i1;TRINITY_DN88654_c0_g2_i8;TRINITY_DN88658_c1_g3_i5;TRINITY_DN91602_c1_g2_i4;TRINITY_DN92454_c3_g1_i1;TRINITY_DN93466_c1_g3_i1…	http://amigo.geneontology.org/amigo/term/GO:0009890	BP	17
GO:0006378	mRNA polyadenylation	1/740	27/21795	0.606713	0.936515	TRINITY_DN78441_c2_g1_i5	http://amigo.geneontology.org/amigo/term/GO:0006378	BP	1
GO:0010104	regulation of ethylene-activated signaling pathway	1/740	27/21795	0.606713	0.936515	TRINITY_DN78565_c0_g1_i1	http://amigo.geneontology.org/amigo/term/GO:0010104	BP	1
GO:0010112	regulation of systemic acquired resistance	1/740	27/21795	0.606713	0.936515	TRINITY_DN94882_c0_g4_i1	http://amigo.geneontology.org/amigo/term/GO:0010112	BP	1
GO:0019884	antigen processing and presentation of exogenous antigen	1/740	27/21795	0.606713	0.936515	TRINITY_DN86288_c3_g4_i1	http://amigo.geneontology.org/amigo/term/GO:0019884	BP	1
GO:0042168	heme metabolic process	1/740	27/21795	0.606713	0.936515	TRINITY_DN79615_c0_g4_i2	http://amigo.geneontology.org/amigo/term/GO:0042168	BP	1
GO:0015819	lysine transport	1/740	27/21795	0.606713	0.936515	TRINITY_DN90456_c1_g1_i1	http://amigo.geneontology.org/amigo/term/GO:0015819	BP	1
GO:0043623	cellular protein complex assembly	8/740	248/21795	0.6083	0.936515	TRINITY_DN73631_c1_g2_i1;TRINITY_DN78350_c0_g1_i4;TRINITY_DN80224_c0_g2_i1;TRINITY_DN86786_c1_g1_i3;TRINITY_DN89072_c0_g1_i1;TRINITY_DN92311_c0_g4_i4;TRINITY_DN94607_c2_g2_i10;TRINITY_DN95329_c3_g2_i1	http://amigo.geneontology.org/amigo/term/GO:0043623	BP	8
GO:0009955	adaxial/abaxial pattern specification	3/740	92/21795	0.608607	0.936515	TRINITY_DN67876_c0_g1_i2;TRINITY_DN70135_c0_g2_i3;TRINITY_DN92040_c0_g1_i11	http://amigo.geneontology.org/amigo/term/GO:0009955	BP	3
GO:0006518	peptide metabolic process	3/740	92/21795	0.608607	0.936515	TRINITY_DN81698_c0_g3_i1;TRINITY_DN88582_c7_g2_i10;TRINITY_DN114980_c0_g1_i1	http://amigo.geneontology.org/amigo/term/GO:0006518	BP	3
GO:0033674	positive regulation of kinase activity	2/740	60/21795	0.609092	0.936515	TRINITY_DN73594_c1_g1_i2;TRINITY_DN86288_c3_g4_i1	http://amigo.geneontology.org/amigo/term/GO:0033674	BP	2
GO:0016553	base conversion or substitution editing	2/740	60/21795	0.609092	0.936515	TRINITY_DN80840_c1_g2_i3;TRINITY_DN85168_c0_g2_i3	http://amigo.geneontology.org/amigo/term/GO:0016553	BP	2
GO:0045936	negative regulation of phosphate metabolic process	2/740	60/21795	0.609092	0.936515	TRINITY_DN71557_c0_g1_i11;TRINITY_DN75913_c2_g1_i8	http://amigo.geneontology.org/amigo/term/GO:0045936	BP	2
GO:0007584	response to nutrient	2/740	60/21795	0.609092	0.936515	TRINITY_DN75152_c3_g2_i1;TRINITY_DN82498_c1_g1_i6	http://amigo.geneontology.org/amigo/term/GO:0007584	BP	2
GO:0051348	negative regulation of transferase activity	2/740	60/21795	0.609092	0.936515	TRINITY_DN71557_c0_g1_i11;TRINITY_DN75913_c2_g1_i8	http://amigo.geneontology.org/amigo/term/GO:0051348	BP	2
GO:0006779	porphyrin-containing compound biosynthetic process	2/740	60/21795	0.609092	0.936515	TRINITY_DN79615_c0_g4_i2;TRINITY_DN93213_c0_g3_i8	http://amigo.geneontology.org/amigo/term/GO:0006779	BP	2
GO:0045859	regulation of protein kinase activity	4/740	124/21795	0.610966	0.937807	TRINITY_DN71557_c0_g1_i11;TRINITY_DN73594_c1_g1_i2;TRINITY_DN75913_c2_g1_i8;TRINITY_DN86288_c3_g4_i1	http://amigo.geneontology.org/amigo/term/GO:0045859	BP	4
GO:0048367	shoot system development	51/740	1548/21795	0.611003	0.937807	TRINITY_DN47904_c0_g1_i1;TRINITY_DN62693_c0_g1_i1;TRINITY_DN67047_c0_g1_i1;TRINITY_DN67350_c0_g1_i1;TRINITY_DN68418_c0_g1_i1;TRINITY_DN70135_c0_g2_i3;TRINITY_DN71355_c0_g1_i1;TRINITY_DN71392_c0_g1_i7;TRINITY_DN72627_c2_g1_i3;TRINITY_DN72765_c0_g1_i1;TRINITY_DN73287_c0_g1_i2;TRINITY_DN74175_c1_g3_i2;TRINITY_DN74875_c0_g2_i3;TRINITY_DN75227_c1_g3_i8;TRINITY_DN76233_c0_g1_i1;TRINITY_DN77419_c0_g1_i1…	http://amigo.geneontology.org/amigo/term/GO:0048367	BP	51
GO:0035556	intracellular signal transduction	9/740	280/21795	0.613412	0.940652	TRINITY_DN65230_c0_g2_i1;TRINITY_DN72538_c0_g1_i2;TRINITY_DN73594_c1_g1_i2;TRINITY_DN75000_c0_g2_i3;TRINITY_DN78762_c0_g4_i13;TRINITY_DN80224_c0_g2_i1;TRINITY_DN84005_c0_g1_i6;TRINITY_DN86288_c3_g4_i1;TRINITY_DN218260_c0_g1_i1	http://amigo.geneontology.org/amigo/term/GO:0035556	BP	9
GO:0043549	regulation of kinase activity	4/740	125/21795	0.61729	0.941377	TRINITY_DN71557_c0_g1_i11;TRINITY_DN73594_c1_g1_i2;TRINITY_DN75913_c2_g1_i8;TRINITY_DN86288_c3_g4_i1	http://amigo.geneontology.org/amigo/term/GO:0043549	BP	4
GO:0012501	programmed cell death	9/740	281/21795	0.617658	0.941377	TRINITY_DN50025_c0_g1_i1;TRINITY_DN75702_c2_g1_i1;TRINITY_DN84755_c2_g5_i3;TRINITY_DN86288_c3_g4_i1;TRINITY_DN86284_c4_g7_i1;TRINITY_DN90038_c1_g1_i2;TRINITY_DN90038_c2_g6_i2;TRINITY_DN94190_c2_g1_i20;TRINITY_DN96272_c4_g2_i1	http://amigo.geneontology.org/amigo/term/GO:0012501	BP	9
GO:0010557	positive regulation of macromolecule biosynthetic process	13/740	404/21795	0.617813	0.941377	TRINITY_DN62693_c0_g1_i1;TRINITY_DN65799_c0_g1_i3;TRINITY_DN68780_c0_g2_i2;TRINITY_DN68775_c1_g1_i1;TRINITY_DN69811_c0_g2_i1;TRINITY_DN72127_c0_g4_i3;TRINITY_DN73294_c5_g2_i2;TRINITY_DN73594_c1_g1_i2;TRINITY_DN79180_c4_g2_i1;TRINITY_DN81577_c0_g5_i2;TRINITY_DN83499_c1_g7_i1;TRINITY_DN86288_c3_g4_i1;TRINITY_DN93473_c3_g1_i1	http://amigo.geneontology.org/amigo/term/GO:0010557	BP	13
GO:0070838	divalent metal ion transport	10/740	312/21795	0.618304	0.941377	TRINITY_DN80886_c0_g5_i2;TRINITY_DN81530_c0_g1_i6;TRINITY_DN81807_c4_g1_i3;TRINITY_DN86907_c3_g4_i3;TRINITY_DN88917_c3_g2_i1;TRINITY_DN89234_c2_g5_i2;TRINITY_DN90136_c5_g5_i2;TRINITY_DN90668_c1_g3_i1;TRINITY_DN96732_c1_g2_i4;TRINITY_DN96732_c1_g4_i3	http://amigo.geneontology.org/amigo/term/GO:0070838	BP	10
GO:0048609	multicellular organismal reproductive process	11/740	343/21795	0.619173	0.941377	TRINITY_DN64333_c0_g1_i2;TRINITY_DN71012_c0_g1_i1;TRINITY_DN71772_c1_g1_i1;TRINITY_DN78940_c0_g4_i2;TRINITY_DN79326_c0_g1_i1;TRINITY_DN79998_c5_g2_i1;TRINITY_DN83499_c1_g7_i1;TRINITY_DN86583_c0_g3_i1;TRINITY_DN89177_c0_g2_i5;TRINITY_DN90371_c1_g1_i1;TRINITY_DN91657_c1_g7_i1	http://amigo.geneontology.org/amigo/term/GO:0048609	BP	11
GO:0051179	localization	113/740	3403/21795	0.619189	0.941377	TRINITY_DN58320_c0_g2_i1;TRINITY_DN66170_c0_g1_i1;TRINITY_DN66246_c0_g1_i1;TRINITY_DN67293_c0_g1_i2;TRINITY_DN67443_c0_g1_i2;TRINITY_DN68107_c0_g1_i1;TRINITY_DN68282_c0_g1_i1;TRINITY_DN69022_c0_g1_i1;TRINITY_DN69901_c0_g2_i2;TRINITY_DN70458_c1_g1_i2;TRINITY_DN70525_c3_g2_i1;TRINITY_DN70640_c1_g1_i2;TRINITY_DN70801_c0_g1_i6;TRINITY_DN70801_c0_g2_i1;TRINITY_DN70887_c0_g1_i2;TRINITY_DN71157_c0_g3_i1…	http://amigo.geneontology.org/amigo/term/GO:0051179	BP	113
GO:0019882	antigen processing and presentation	1/740	28/21795	0.620082	0.941377	TRINITY_DN86288_c3_g4_i1	http://amigo.geneontology.org/amigo/term/GO:0019882	BP	1
GO:0035295	tube development	1/740	28/21795	0.620082	0.941377	TRINITY_DN69073_c2_g1_i1	http://amigo.geneontology.org/amigo/term/GO:0035295	BP	1
GO:0048510	regulation of timing of transition from vegetative to reproductive phase	1/740	28/21795	0.620082	0.941377	TRINITY_DN68780_c0_g2_i2	http://amigo.geneontology.org/amigo/term/GO:0048510	BP	1
GO:0035266	meristem growth	1/740	28/21795	0.620082	0.941377	TRINITY_DN69811_c0_g2_i1	http://amigo.geneontology.org/amigo/term/GO:0035266	BP	1
GO:0048506	regulation of timing of meristematic phase transition	1/740	28/21795	0.620082	0.941377	TRINITY_DN68780_c0_g2_i2	http://amigo.geneontology.org/amigo/term/GO:0048506	BP	1
GO:0045597	positive regulation of cell differentiation	1/740	28/21795	0.620082	0.941377	TRINITY_DN74175_c1_g3_i2	http://amigo.geneontology.org/amigo/term/GO:0045597	BP	1
GO:0006984	ER-nucleus signaling pathway	1/740	28/21795	0.620082	0.941377	TRINITY_DN69285_c0_g1_i1	http://amigo.geneontology.org/amigo/term/GO:0006984	BP	1
GO:0006534	cysteine metabolic process	1/740	28/21795	0.620082	0.941377	TRINITY_DN86666_c2_g5_i1	http://amigo.geneontology.org/amigo/term/GO:0006534	BP	1
GO:0042692	muscle cell differentiation	1/740	28/21795	0.620082	0.941377	TRINITY_DN94190_c2_g1_i20	http://amigo.geneontology.org/amigo/term/GO:0042692	BP	1
GO:0048002	antigen processing and presentation of peptide antigen	1/740	28/21795	0.620082	0.941377	TRINITY_DN86288_c3_g4_i1	http://amigo.geneontology.org/amigo/term/GO:0048002	BP	1
GO:0019932	second-messenger-mediated signaling	3/740	94/21795	0.623175	0.943571	TRINITY_DN65230_c0_g2_i1;TRINITY_DN78762_c0_g4_i13;TRINITY_DN84005_c0_g1_i6	http://amigo.geneontology.org/amigo/term/GO:0019932	BP	3
GO:0042325	regulation of phosphorylation	5/740	158/21795	0.625595	0.94527	TRINITY_DN71557_c0_g1_i11;TRINITY_DN73594_c1_g1_i2;TRINITY_DN75913_c2_g1_i8;TRINITY_DN79488_c1_g6_i1;TRINITY_DN86288_c3_g4_i1	http://amigo.geneontology.org/amigo/term/GO:0042325	BP	5
GO:0090068	positive regulation of cell cycle process	2/740	62/21795	0.626978	0.945875	TRINITY_DN86288_c3_g4_i1;TRINITY_DN90636_c0_g1_i7	http://amigo.geneontology.org/amigo/term/GO:0090068	BP	2
GO:0006265	DNA topological change	2/740	62/21795	0.626978	0.945875	TRINITY_DN90194_c1_g2_i2;TRINITY_DN95317_c0_g12_i2	http://amigo.geneontology.org/amigo/term/GO:0006265	BP	2
GO:0019321	pentose metabolic process	2/740	62/21795	0.626978	0.945875	TRINITY_DN70951_c0_g1_i9;TRINITY_DN72895_c3_g2_i4	http://amigo.geneontology.org/amigo/term/GO:0019321	BP	2
GO:0042787	protein ubiquitination involved in ubiquitin-dependent protein catabolic process	3/740	95/21795	0.630319	0.950418	TRINITY_DN76249_c2_g1_i6;TRINITY_DN85716_c0_g1_i22;TRINITY_DN95963_c2_g3_i2	http://amigo.geneontology.org/amigo/term/GO:0042787	BP	3
GO:0010043	response to zinc ion	5/740	159/21795	0.631133	0.950485	TRINITY_DN85813_c5_g1_i1;TRINITY_DN88003_c3_g5_i2;TRINITY_DN89234_c2_g5_i2;TRINITY_DN90668_c1_g3_i1;TRINITY_DN123479_c0_g1_i1	http://amigo.geneontology.org/amigo/term/GO:0010043	BP	5
GO:0040018	positive regulation of multicellular organism growth	1/740	29/21795	0.632998	0.950485	TRINITY_DN88654_c0_g2_i8	http://amigo.geneontology.org/amigo/term/GO:0040018	BP	1
GO:0051046	regulation of secretion	1/740	29/21795	0.632998	0.950485	TRINITY_DN75000_c0_g2_i3	http://amigo.geneontology.org/amigo/term/GO:0051046	BP	1
GO:0045682	regulation of epidermis development	1/740	29/21795	0.632998	0.950485	TRINITY_DN94190_c2_g1_i20	http://amigo.geneontology.org/amigo/term/GO:0045682	BP	1
GO:0002239	response to oomycetes	1/740	29/21795	0.632998	0.950485	TRINITY_DN73594_c1_g1_i2	http://amigo.geneontology.org/amigo/term/GO:0002239	BP	1
GO:0051568	histone H3-K4 methylation	1/740	29/21795	0.632998	0.950485	TRINITY_DN80593_c0_g6_i1	http://amigo.geneontology.org/amigo/term/GO:0051568	BP	1
GO:0044770	cell cycle phase transition	2/740	63/21795	0.63568	0.950493	TRINITY_DN72421_c2_g4_i3;TRINITY_DN86288_c3_g4_i1	http://amigo.geneontology.org/amigo/term/GO:0044770	BP	2
GO:0044772	mitotic cell cycle phase transition	2/740	63/21795	0.63568	0.950493	TRINITY_DN72421_c2_g4_i3;TRINITY_DN86288_c3_g4_i1	http://amigo.geneontology.org/amigo/term/GO:0044772	BP	2
GO:1901991	negative regulation of mitotic cell cycle phase transition	2/740	63/21795	0.63568	0.950493	TRINITY_DN85106_c2_g3_i3;TRINITY_DN86288_c3_g4_i1	http://amigo.geneontology.org/amigo/term/GO:1901991	BP	2
GO:0010029	regulation of seed germination	4/740	128/21795	0.635872	0.950493	TRINITY_DN73294_c5_g2_i2;TRINITY_DN79447_c3_g1_i1;TRINITY_DN85344_c1_g3_i2;TRINITY_DN93504_c0_g1_i1	http://amigo.geneontology.org/amigo/term/GO:0010029	BP	4
GO:0010090	trichome morphogenesis	5/740	160/21795	0.63662	0.950493	TRINITY_DN69993_c2_g2_i1;TRINITY_DN70539_c0_g1_i1;TRINITY_DN78072_c0_g2_i20;TRINITY_DN85716_c0_g1_i22;TRINITY_DN88816_c3_g1_i1	http://amigo.geneontology.org/amigo/term/GO:0010090	BP	5
GO:0043604	amide biosynthetic process	3/740	96/21795	0.637369	0.95111	TRINITY_DN71723_c2_g1_i1;TRINITY_DN88582_c7_g2_i10;TRINITY_DN92577_c0_g1_i5	http://amigo.geneontology.org/amigo/term/GO:0043604	BP	3
GO:0043934	sporulation	2/740	64/21795	0.644222	0.955718	TRINITY_DN43850_c0_g1_i1;TRINITY_DN75000_c0_g2_i3	http://amigo.geneontology.org/amigo/term/GO:0043934	BP	2
GO:0019751	polyol metabolic process	2/740	64/21795	0.644222	0.955718	TRINITY_DN75732_c1_g1_i6;TRINITY_DN84005_c0_g1_i6	http://amigo.geneontology.org/amigo/term/GO:0019751	BP	2
GO:0071248	cellular response to metal ion	3/740	97/21795	0.644324	0.955718	TRINITY_DN78565_c0_g1_i1;TRINITY_DN79447_c3_g1_i1;TRINITY_DN86711_c0_g1_i2	http://amigo.geneontology.org/amigo/term/GO:0071248	BP	3
GO:0007626	locomotory behavior	1/740	30/21795	0.645476	0.955718	TRINITY_DN80224_c0_g2_i1	http://amigo.geneontology.org/amigo/term/GO:0007626	BP	1
GO:2001251	negative regulation of chromosome organization	1/740	30/21795	0.645476	0.955718	TRINITY_DN66001_c0_g1_i2	http://amigo.geneontology.org/amigo/term/GO:2001251	BP	1
GO:0042773	ATP synthesis coupled electron transport	1/740	30/21795	0.645476	0.955718	TRINITY_DN79715_c0_g6_i1	http://amigo.geneontology.org/amigo/term/GO:0042773	BP	1
GO:0070988	demethylation	1/740	30/21795	0.645476	0.955718	TRINITY_DN75500_c1_g1_i1	http://amigo.geneontology.org/amigo/term/GO:0070988	BP	1
GO:0006208	pyrimidine nucleobase catabolic process	1/740	30/21795	0.645476	0.955718	TRINITY_DN93805_c2_g1_i3	http://amigo.geneontology.org/amigo/term/GO:0006208	BP	1
GO:0048749	compound eye development	1/740	30/21795	0.645476	0.955718	TRINITY_DN71772_c1_g1_i1	http://amigo.geneontology.org/amigo/term/GO:0048749	BP	1
GO:0015813	L-glutamate transport	1/740	30/21795	0.645476	0.955718	TRINITY_DN90456_c1_g1_i1	http://amigo.geneontology.org/amigo/term/GO:0015813	BP	1
GO:0048592	eye morphogenesis	1/740	30/21795	0.645476	0.955718	TRINITY_DN71772_c1_g1_i1	http://amigo.geneontology.org/amigo/term/GO:0048592	BP	1
GO:0010311	lateral root formation	4/740	130/21795	0.647931	0.955718	TRINITY_DN73792_c0_g1_i3;TRINITY_DN75510_c0_g5_i4;TRINITY_DN78637_c1_g1_i3;TRINITY_DN85439_c1_g1_i2	http://amigo.geneontology.org/amigo/term/GO:0010311	BP	4
GO:0010315	auxin efflux	4/740	130/21795	0.647931	0.955718	TRINITY_DN85778_c2_g7_i1;TRINITY_DN90446_c3_g2_i3;TRINITY_DN90446_c3_g4_i1;TRINITY_DN92713_c1_g5_i1	http://amigo.geneontology.org/amigo/term/GO:0010315	BP	4
GO:0007010	cytoskeleton organization	12/740	382/21795	0.649032	0.955718	TRINITY_DN74764_c2_g1_i1;TRINITY_DN75000_c0_g2_i3;TRINITY_DN76437_c5_g2_i1;TRINITY_DN77139_c0_g2_i1;TRINITY_DN77139_c0_g3_i1;TRINITY_DN79243_c1_g4_i2;TRINITY_DN84901_c3_g3_i1;TRINITY_DN88013_c3_g8_i1;TRINITY_DN91688_c1_g5_i4;TRINITY_DN94190_c2_g1_i20;TRINITY_DN94495_c1_g1_i2;TRINITY_DN95483_c2_g1_i3	http://amigo.geneontology.org/amigo/term/GO:0007010	BP	12
GO:0042344	indole glucosinolate catabolic process	2/740	65/21795	0.652606	0.958971	TRINITY_DN86907_c3_g4_i3;TRINITY_DN88582_c7_g2_i10	http://amigo.geneontology.org/amigo/term/GO:0042344	BP	2
GO:0007015	actin filament organization	2/740	65/21795	0.652606	0.958971	TRINITY_DN74764_c2_g1_i1;TRINITY_DN95483_c2_g1_i3	http://amigo.geneontology.org/amigo/term/GO:0007015	BP	2
GO:0042327	positive regulation of phosphorylation	2/740	65/21795	0.652606	0.958971	TRINITY_DN73594_c1_g1_i2;TRINITY_DN86288_c3_g4_i1	http://amigo.geneontology.org/amigo/term/GO:0042327	BP	2
GO:0001934	positive regulation of protein phosphorylation	2/740	65/21795	0.652606	0.958971	TRINITY_DN73594_c1_g1_i2;TRINITY_DN86288_c3_g4_i1	http://amigo.geneontology.org/amigo/term/GO:0001934	BP	2
GO:0032504	multicellular organism reproduction	11/740	353/21795	0.656544	0.959853	TRINITY_DN64333_c0_g1_i2;TRINITY_DN71012_c0_g1_i1;TRINITY_DN71772_c1_g1_i1;TRINITY_DN78940_c0_g4_i2;TRINITY_DN79326_c0_g1_i1;TRINITY_DN79998_c5_g2_i1;TRINITY_DN83499_c1_g7_i1;TRINITY_DN86583_c0_g3_i1;TRINITY_DN89177_c0_g2_i5;TRINITY_DN90371_c1_g1_i1;TRINITY_DN91657_c1_g7_i1	http://amigo.geneontology.org/amigo/term/GO:0032504	BP	11
GO:0006119	oxidative phosphorylation	1/740	31/21795	0.657529	0.959853	TRINITY_DN79715_c0_g6_i1	http://amigo.geneontology.org/amigo/term/GO:0006119	BP	1
GO:0007409	axonogenesis	1/740	31/21795	0.657529	0.959853	TRINITY_DN80224_c0_g2_i1	http://amigo.geneontology.org/amigo/term/GO:0007409	BP	1
GO:0006560	proline metabolic process	1/740	31/21795	0.657529	0.959853	TRINITY_DN90914_c3_g2_i1	http://amigo.geneontology.org/amigo/term/GO:0006560	BP	1
GO:0006740	NADPH regeneration	1/740	31/21795	0.657529	0.959853	TRINITY_DN72895_c3_g2_i4	http://amigo.geneontology.org/amigo/term/GO:0006740	BP	1
GO:0030641	regulation of cellular pH	1/740	31/21795	0.657529	0.959853	TRINITY_DN83913_c3_g5_i1	http://amigo.geneontology.org/amigo/term/GO:0030641	BP	1
GO:0051453	regulation of intracellular pH	1/740	31/21795	0.657529	0.959853	TRINITY_DN83913_c3_g5_i1	http://amigo.geneontology.org/amigo/term/GO:0051453	BP	1
GO:0043649	dicarboxylic acid catabolic process	1/740	31/21795	0.657529	0.959853	TRINITY_DN79447_c3_g1_i1	http://amigo.geneontology.org/amigo/term/GO:0043649	BP	1
GO:0015809	arginine transport	1/740	31/21795	0.657529	0.959853	TRINITY_DN90456_c1_g1_i1	http://amigo.geneontology.org/amigo/term/GO:0015809	BP	1
GO:0034620	cellular response to unfolded protein	1/740	31/21795	0.657529	0.959853	TRINITY_DN69285_c0_g1_i1	http://amigo.geneontology.org/amigo/term/GO:0034620	BP	1
GO:0031060	regulation of histone methylation	1/740	31/21795	0.657529	0.959853	TRINITY_DN66001_c0_g1_i2	http://amigo.geneontology.org/amigo/term/GO:0031060	BP	1
GO:0030163	protein catabolic process	14/740	447/21795	0.659114	0.960784	TRINITY_DN71772_c1_g1_i1;TRINITY_DN74875_c0_g2_i3;TRINITY_DN76249_c2_g1_i6;TRINITY_DN76437_c5_g2_i1;TRINITY_DN77139_c0_g2_i1;TRINITY_DN77139_c0_g3_i1;TRINITY_DN80224_c0_g2_i1;TRINITY_DN85716_c0_g1_i22;TRINITY_DN86288_c3_g4_i1;TRINITY_DN88013_c3_g8_i1;TRINITY_DN89072_c0_g1_i1;TRINITY_DN90238_c5_g3_i3;TRINITY_DN92311_c0_g4_i4;TRINITY_DN95963_c2_g3_i2	http://amigo.geneontology.org/amigo/term/GO:0030163	BP	14
GO:0045937	positive regulation of phosphate metabolic process	2/740	66/21795	0.66083	0.960784	TRINITY_DN73594_c1_g1_i2;TRINITY_DN86288_c3_g4_i1	http://amigo.geneontology.org/amigo/term/GO:0045937	BP	2
GO:0042343	indole glucosinolate metabolic process	2/740	66/21795	0.66083	0.960784	TRINITY_DN86907_c3_g4_i3;TRINITY_DN88582_c7_g2_i10	http://amigo.geneontology.org/amigo/term/GO:0042343	BP	2
GO:0006862	nucleotide transport	2/740	66/21795	0.66083	0.960784	TRINITY_DN82761_c0_g1_i6;TRINITY_DN84932_c0_g1_i4	http://amigo.geneontology.org/amigo/term/GO:0006862	BP	2
GO:0034968	histone lysine methylation	2/740	66/21795	0.66083	0.960784	TRINITY_DN80593_c0_g6_i1;TRINITY_DN93466_c1_g3_i1	http://amigo.geneontology.org/amigo/term/GO:0034968	BP	2
GO:0006397	mRNA processing	9/740	292/21795	0.662706	0.963027	TRINITY_DN68559_c0_g1_i2;TRINITY_DN77470_c1_g2_i1;TRINITY_DN78441_c2_g1_i5;TRINITY_DN80802_c3_g1_i1;TRINITY_DN80976_c2_g5_i1;TRINITY_DN83199_c1_g4_i2;TRINITY_DN86585_c0_g1_i8;TRINITY_DN92796_c5_g1_i1;TRINITY_DN96468_c1_g3_i2	http://amigo.geneontology.org/amigo/term/GO:0006397	BP	9
GO:0030244	cellulose biosynthetic process	3/740	100/21795	0.664619	0.96369	TRINITY_DN74169_c0_g7_i1;TRINITY_DN87396_c1_g3_i1;TRINITY_DN87396_c1_g2_i6	http://amigo.geneontology.org/amigo/term/GO:0030244	BP	3
GO:0007623	circadian rhythm	4/740	133/21795	0.665517	0.96369	TRINITY_DN65799_c0_g1_i3;TRINITY_DN73152_c1_g3_i1;TRINITY_DN78980_c2_g2_i3;TRINITY_DN84109_c0_g2_i2	http://amigo.geneontology.org/amigo/term/GO:0007623	BP	4
GO:0048366	leaf development	29/740	911/21795	0.667437	0.96369	TRINITY_DN68418_c0_g1_i1;TRINITY_DN70135_c0_g2_i3;TRINITY_DN74875_c0_g2_i3;TRINITY_DN75227_c1_g3_i8;TRINITY_DN77419_c0_g1_i10;TRINITY_DN78300_c2_g8_i1;TRINITY_DN79255_c2_g3_i2;TRINITY_DN79780_c4_g2_i1;TRINITY_DN80331_c0_g6_i1;TRINITY_DN82731_c0_g4_i2;TRINITY_DN83068_c1_g1_i1;TRINITY_DN83199_c1_g4_i2;TRINITY_DN83523_c1_g2_i2;TRINITY_DN83949_c1_g2_i2;TRINITY_DN85192_c0_g2_i3;TRINITY_DN87282_c0_g3_i…	http://amigo.geneontology.org/amigo/term/GO:0048366	BP	29
GO:0015749	monosaccharide transport	2/740	67/21795	0.668898	0.96369	TRINITY_DN90235_c0_g2_i12;TRINITY_DN92375_c1_g2_i4	http://amigo.geneontology.org/amigo/term/GO:0015749	BP	2
GO:0007088	regulation of mitotic nuclear division	1/740	32/21795	0.669174	0.96369	TRINITY_DN85106_c2_g3_i3	http://amigo.geneontology.org/amigo/term/GO:0007088	BP	1
GO:2000027	regulation of organ morphogenesis	1/740	32/21795	0.669174	0.96369	TRINITY_DN70640_c1_g1_i2	http://amigo.geneontology.org/amigo/term/GO:2000027	BP	1
GO:0048830	adventitious root development	1/740	32/21795	0.669174	0.96369	TRINITY_DN70135_c0_g2_i3	http://amigo.geneontology.org/amigo/term/GO:0048830	BP	1
GO:0030026	cellular manganese ion homeostasis	1/740	32/21795	0.669174	0.96369	TRINITY_DN90136_c5_g5_i2	http://amigo.geneontology.org/amigo/term/GO:0030026	BP	1
GO:0009970	cellular response to sulfate starvation	1/740	32/21795	0.669174	0.96369	TRINITY_DN90204_c2_g3_i5	http://amigo.geneontology.org/amigo/term/GO:0009970	BP	1
GO:0035303	regulation of dephosphorylation	1/740	32/21795	0.669174	0.96369	TRINITY_DN79488_c1_g6_i1	http://amigo.geneontology.org/amigo/term/GO:0035303	BP	1
GO:0045471	response to ethanol	1/740	32/21795	0.669174	0.96369	TRINITY_DN91428_c1_g5_i1	http://amigo.geneontology.org/amigo/term/GO:0045471	BP	1
GO:0007265	Ras protein signal transduction	1/740	32/21795	0.669174	0.96369	TRINITY_DN218260_c0_g1_i1	http://amigo.geneontology.org/amigo/term/GO:0007265	BP	1
GO:0006406	mRNA export from nucleus	1/740	32/21795	0.669174	0.96369	TRINITY_DN77451_c0_g4_i1	http://amigo.geneontology.org/amigo/term/GO:0006406	BP	1
GO:0051028	mRNA transport	1/740	32/21795	0.669174	0.96369	TRINITY_DN77451_c0_g4_i1	http://amigo.geneontology.org/amigo/term/GO:0051028	BP	1
GO:0055088	lipid homeostasis	1/740	32/21795	0.669174	0.96369	TRINITY_DN90264_c0_g4_i2	http://amigo.geneontology.org/amigo/term/GO:0055088	BP	1
GO:0035435	phosphate ion transmembrane transport	1/740	32/21795	0.669174	0.96369	TRINITY_DN70525_c3_g2_i1	http://amigo.geneontology.org/amigo/term/GO:0035435	BP	1
GO:0070574	cadmium ion transmembrane transport	3/740	101/21795	0.671194	0.96379	TRINITY_DN86907_c3_g4_i3;TRINITY_DN89234_c2_g5_i2;TRINITY_DN90668_c1_g3_i1	http://amigo.geneontology.org/amigo/term/GO:0070574	BP	3
GO:0009908	flower development	19/740	607/21795	0.674805	0.966494	TRINITY_DN62693_c0_g1_i1;TRINITY_DN67047_c0_g1_i1;TRINITY_DN67350_c0_g1_i1;TRINITY_DN71355_c0_g1_i1;TRINITY_DN71392_c0_g1_i7;TRINITY_DN72627_c2_g1_i3;TRINITY_DN72765_c0_g1_i1;TRINITY_DN73287_c0_g1_i2;TRINITY_DN76233_c0_g1_i1;TRINITY_DN81281_c4_g1_i1;TRINITY_DN82731_c0_g4_i2;TRINITY_DN83499_c1_g7_i1;TRINITY_DN83523_c1_g2_i2;TRINITY_DN89084_c1_g2_i3;TRINITY_DN89409_c1_g3_i3;TRINITY_DN89850_c5_g1_i3…	http://amigo.geneontology.org/amigo/term/GO:0009908	BP	19
GO:0003002	regionalization	20/740	638/21795	0.675141	0.966496	TRINITY_DN15130_c1_g1_i1;TRINITY_DN62693_c0_g1_i1;TRINITY_DN67876_c0_g1_i2;TRINITY_DN68559_c0_g1_i2;TRINITY_DN70135_c0_g2_i3;TRINITY_DN71772_c1_g1_i1;TRINITY_DN72838_c0_g1_i11;TRINITY_DN74399_c0_g2_i2;TRINITY_DN75355_c1_g1_i13;TRINITY_DN79601_c8_g1_i4;TRINITY_DN79780_c4_g2_i1;TRINITY_DN80567_c0_g6_i1;TRINITY_DN82731_c0_g4_i2;TRINITY_DN84005_c0_g1_i6;TRINITY_DN86585_c0_g1_i8;TRINITY_DN86880_c1_g4_…	http://amigo.geneontology.org/amigo/term/GO:0003002	BP	20
GO:0072511	divalent inorganic cation transport	10/740	327/21795	0.676079	0.96736	TRINITY_DN80886_c0_g5_i2;TRINITY_DN81530_c0_g1_i6;TRINITY_DN81807_c4_g1_i3;TRINITY_DN86907_c3_g4_i3;TRINITY_DN88917_c3_g2_i1;TRINITY_DN89234_c2_g5_i2;TRINITY_DN90136_c5_g5_i2;TRINITY_DN90668_c1_g3_i1;TRINITY_DN96732_c1_g2_i4;TRINITY_DN96732_c1_g4_i3	http://amigo.geneontology.org/amigo/term/GO:0072511	BP	10
GO:0048511	rhythmic process	4/740	135/21795	0.676903	0.96758	TRINITY_DN65799_c0_g1_i3;TRINITY_DN73152_c1_g3_i1;TRINITY_DN78980_c2_g2_i3;TRINITY_DN84109_c0_g2_i2	http://amigo.geneontology.org/amigo/term/GO:0048511	BP	4
GO:0001932	regulation of protein phosphorylation	4/740	135/21795	0.676903	0.96758	TRINITY_DN71557_c0_g1_i11;TRINITY_DN73594_c1_g1_i2;TRINITY_DN75913_c2_g1_i8;TRINITY_DN86288_c3_g4_i1	http://amigo.geneontology.org/amigo/term/GO:0001932	BP	4
GO:0006357	regulation of transcription from RNA polymerase II promoter	3/740	102/21795	0.677674	0.967723	TRINITY_DN71772_c1_g1_i1;TRINITY_DN86288_c3_g4_i1;TRINITY_DN88654_c0_g2_i8	http://amigo.geneontology.org/amigo/term/GO:0006357	BP	3
GO:0006007	glucose catabolic process	3/740	102/21795	0.677674	0.967723	TRINITY_DN72895_c3_g2_i4;TRINITY_DN85255_c1_g1_i1;TRINITY_DN88654_c0_g2_i8	http://amigo.geneontology.org/amigo/term/GO:0006007	BP	3
GO:0005977	glycogen metabolic process	1/740	33/21795	0.680423	0.967816	TRINITY_DN76717_c5_g1_i1	http://amigo.geneontology.org/amigo/term/GO:0005977	BP	1
GO:0046113	nucleobase catabolic process	1/740	33/21795	0.680423	0.967816	TRINITY_DN93805_c2_g1_i3	http://amigo.geneontology.org/amigo/term/GO:0046113	BP	1
GO:0010389	regulation of G2/M transition of mitotic cell cycle	1/740	33/21795	0.680423	0.967816	TRINITY_DN72421_c2_g4_i3	http://amigo.geneontology.org/amigo/term/GO:0010389	BP	1
GO:0044774	mitotic DNA integrity checkpoint	1/740	33/21795	0.680423	0.967816	TRINITY_DN86288_c3_g4_i1	http://amigo.geneontology.org/amigo/term/GO:0044774	BP	1
GO:0009825	multidimensional cell growth	1/740	33/21795	0.680423	0.967816	TRINITY_DN92693_c1_g2_i3	http://amigo.geneontology.org/amigo/term/GO:0009825	BP	1
GO:0044773	mitotic DNA damage checkpoint	1/740	33/21795	0.680423	0.967816	TRINITY_DN86288_c3_g4_i1	http://amigo.geneontology.org/amigo/term/GO:0044773	BP	1
GO:0006887	exocytosis	1/740	33/21795	0.680423	0.967816	TRINITY_DN75000_c0_g2_i3	http://amigo.geneontology.org/amigo/term/GO:0006887	BP	1
GO:0061564	axon development	1/740	33/21795	0.680423	0.967816	TRINITY_DN80224_c0_g2_i1	http://amigo.geneontology.org/amigo/term/GO:0061564	BP	1
GO:0042127	regulation of cell proliferation	5/740	169/21795	0.683697	0.967958	TRINITY_DN53892_c1_g1_i1;TRINITY_DN74175_c1_g3_i2;TRINITY_DN83197_c0_g1_i2;TRINITY_DN89177_c0_g5_i1;TRINITY_DN94190_c2_g1_i20	http://amigo.geneontology.org/amigo/term/GO:0042127	BP	5
GO:0006869	lipid transport	3/740	103/21795	0.684059	0.967958	TRINITY_DN67443_c0_g1_i2;TRINITY_DN75068_c0_g3_i2;TRINITY_DN75068_c0_g4_i1	http://amigo.geneontology.org/amigo/term/GO:0006869	BP	3
GO:0015691	cadmium ion transport	3/740	103/21795	0.684059	0.967958	TRINITY_DN86907_c3_g4_i3;TRINITY_DN89234_c2_g5_i2;TRINITY_DN90668_c1_g3_i1	http://amigo.geneontology.org/amigo/term/GO:0015691	BP	3
GO:0005975	carbohydrate metabolic process	37/740	1163/21795	0.684187	0.967958	TRINITY_DN42865_c0_g1_i2;TRINITY_DN49697_c0_g1_i1;TRINITY_DN66170_c0_g1_i1;TRINITY_DN68994_c0_g1_i2;TRINITY_DN69285_c0_g1_i1;TRINITY_DN69811_c0_g2_i1;TRINITY_DN70263_c0_g1_i2;TRINITY_DN70951_c0_g1_i9;TRINITY_DN72895_c3_g2_i4;TRINITY_DN74169_c0_g7_i1;TRINITY_DN74830_c0_g1_i3;TRINITY_DN75350_c1_g3_i2;TRINITY_DN75732_c1_g1_i6;TRINITY_DN76717_c5_g1_i1;TRINITY_DN77314_c0_g3_i1;TRINITY_DN77314_c0_g1_i5…	http://amigo.geneontology.org/amigo/term/GO:0005975	BP	37
GO:0010091	trichome branching	2/740	69/21795	0.684567	0.967958	TRINITY_DN85716_c0_g1_i22;TRINITY_DN88816_c3_g1_i1	http://amigo.geneontology.org/amigo/term/GO:0010091	BP	2
GO:0015807	L-amino acid transport	2/740	69/21795	0.684567	0.967958	TRINITY_DN88544_c0_g3_i4;TRINITY_DN90456_c1_g1_i1	http://amigo.geneontology.org/amigo/term/GO:0015807	BP	2
GO:0051347	positive regulation of transferase activity	2/740	69/21795	0.684567	0.967958	TRINITY_DN73594_c1_g1_i2;TRINITY_DN86288_c3_g4_i1	http://amigo.geneontology.org/amigo/term/GO:0051347	BP	2
GO:0070301	cellular response to hydrogen peroxide	2/740	69/21795	0.684567	0.967958	TRINITY_DN90204_c2_g3_i5;TRINITY_DN95935_c2_g1_i2	http://amigo.geneontology.org/amigo/term/GO:0070301	BP	2
GO:0006629	lipid metabolic process	42/740	1318/21795	0.689292	0.972442	TRINITY_DN63938_c0_g1_i1;TRINITY_DN64333_c0_g1_i2;TRINITY_DN67629_c0_g1_i1;TRINITY_DN68864_c0_g1_i6;TRINITY_DN69285_c0_g1_i1;TRINITY_DN69553_c0_g1_i1;TRINITY_DN70511_c0_g2_i2;TRINITY_DN71012_c0_g1_i1;TRINITY_DN71536_c0_g1_i2;TRINITY_DN71536_c0_g2_i4;TRINITY_DN71562_c3_g1_i1;TRINITY_DN72083_c0_g1_i4;TRINITY_DN73326_c0_g1_i1;TRINITY_DN73326_c0_g3_i3;TRINITY_DN73481_c7_g1_i1;TRINITY_DN73693_c0_g3_i2…	http://amigo.geneontology.org/amigo/term/GO:0006629	BP	42
GO:0007017	microtubule-based process	8/740	267/21795	0.689293	0.972442	TRINITY_DN76437_c5_g2_i1;TRINITY_DN77139_c0_g2_i1;TRINITY_DN77139_c0_g3_i1;TRINITY_DN79243_c1_g4_i2;TRINITY_DN84901_c3_g3_i1;TRINITY_DN84921_c1_g1_i2;TRINITY_DN88013_c3_g8_i1;TRINITY_DN91688_c1_g5_i4	http://amigo.geneontology.org/amigo/term/GO:0007017	BP	8
GO:0031497	chromatin assembly	1/740	34/21795	0.69129	0.972442	TRINITY_DN95457_c5_g4_i1	http://amigo.geneontology.org/amigo/term/GO:0031497	BP	1
GO:0009641	shade avoidance	1/740	34/21795	0.69129	0.972442	TRINITY_DN84109_c0_g2_i2	http://amigo.geneontology.org/amigo/term/GO:0009641	BP	1
GO:0045727	positive regulation of translation	1/740	34/21795	0.69129	0.972442	TRINITY_DN65799_c0_g1_i3	http://amigo.geneontology.org/amigo/term/GO:0045727	BP	1
GO:0010216	maintenance of DNA methylation	1/740	34/21795	0.69129	0.972442	TRINITY_DN93493_c1_g2_i5	http://amigo.geneontology.org/amigo/term/GO:0010216	BP	1
GO:0035967	cellular response to topologically incorrect protein	1/740	34/21795	0.69129	0.972442	TRINITY_DN69285_c0_g1_i1	http://amigo.geneontology.org/amigo/term/GO:0035967	BP	1
GO:0009893	positive regulation of metabolic process	17/740	551/21795	0.691489	0.972442	TRINITY_DN62693_c0_g1_i1;TRINITY_DN65799_c0_g1_i3;TRINITY_DN66001_c0_g1_i2;TRINITY_DN68780_c0_g2_i2;TRINITY_DN68775_c1_g1_i1;TRINITY_DN68815_c0_g1_i1;TRINITY_DN69811_c0_g2_i1;TRINITY_DN70602_c0_g2_i1;TRINITY_DN72127_c0_g4_i3;TRINITY_DN73294_c5_g2_i2;TRINITY_DN73594_c1_g1_i2;TRINITY_DN79180_c4_g2_i1;TRINITY_DN80224_c0_g2_i1;TRINITY_DN81577_c0_g5_i2;TRINITY_DN83499_c1_g7_i1;TRINITY_DN86288_c3_g4_i1…	http://amigo.geneontology.org/amigo/term/GO:0009893	BP	17
GO:0060341	regulation of cellular localization	2/740	70/21795	0.692171	0.972442	TRINITY_DN75000_c0_g2_i3;TRINITY_DN80224_c0_g2_i1	http://amigo.geneontology.org/amigo/term/GO:0060341	BP	2
GO:0006066	alcohol metabolic process	9/740	300/21795	0.693446	0.972442	TRINITY_DN64333_c0_g1_i2;TRINITY_DN68864_c0_g1_i6;TRINITY_DN69285_c0_g1_i1;TRINITY_DN75732_c1_g1_i6;TRINITY_DN83523_c1_g2_i2;TRINITY_DN84005_c0_g1_i6;TRINITY_DN90264_c0_g4_i2;TRINITY_DN92265_c8_g3_i1;TRINITY_DN95812_c1_g1_i9	http://amigo.geneontology.org/amigo/term/GO:0006066	BP	9
GO:0005996	monosaccharide metabolic process	9/740	300/21795	0.693446	0.972442	TRINITY_DN49697_c0_g1_i1;TRINITY_DN66170_c0_g1_i1;TRINITY_DN70951_c0_g1_i9;TRINITY_DN72895_c3_g2_i4;TRINITY_DN77314_c0_g3_i1;TRINITY_DN77314_c0_g1_i5;TRINITY_DN85255_c1_g1_i1;TRINITY_DN87313_c1_g1_i9;TRINITY_DN88654_c0_g2_i8	http://amigo.geneontology.org/amigo/term/GO:0005996	BP	9
GO:0051701	interaction with host	6/740	204/21795	0.695306	0.974104	TRINITY_DN70135_c0_g2_i3;TRINITY_DN77283_c0_g1_i4;TRINITY_DN77283_c0_g5_i1;TRINITY_DN85827_c2_g1_i4;TRINITY_DN92796_c5_g1_i1;TRINITY_DN215683_c0_g1_i1	http://amigo.geneontology.org/amigo/term/GO:0051701	BP	6
GO:0044743	protein transmembrane import into intracellular organelle	3/740	105/21795	0.696545	0.974893	TRINITY_DN71954_c3_g8_i3;TRINITY_DN89072_c0_g1_i1;TRINITY_DN92311_c0_g4_i4	http://amigo.geneontology.org/amigo/term/GO:0044743	BP	3
GO:0048285	organelle fission	4/740	139/21795	0.698858	0.977018	TRINITY_DN77344_c1_g6_i1;TRINITY_DN77344_c1_g7_i1;TRINITY_DN87241_c2_g1_i1;TRINITY_DN97059_c7_g1_i1	http://amigo.geneontology.org/amigo/term/GO:0048285	BP	4
GO:0007031	peroxisome organization	2/740	71/21795	0.699623	0.977018	TRINITY_DN89072_c0_g1_i1;TRINITY_DN92311_c0_g4_i4	http://amigo.geneontology.org/amigo/term/GO:0007031	BP	2
GO:0051301	cell division	12/740	397/21795	0.699756	0.977018	TRINITY_DN67782_c0_g1_i1;TRINITY_DN75000_c0_g2_i3;TRINITY_DN81011_c0_g2_i4;TRINITY_DN81193_c0_g2_i4;TRINITY_DN81193_c0_g1_i3;TRINITY_DN85495_c0_g3_i5;TRINITY_DN85909_c5_g1_i1;TRINITY_DN89202_c1_g2_i1;TRINITY_DN89202_c1_g4_i1;TRINITY_DN89202_c1_g5_i1;TRINITY_DN89202_c1_g6_i3;TRINITY_DN94882_c0_g4_i1	http://amigo.geneontology.org/amigo/term/GO:0051301	BP	12
GO:0030104	water homeostasis	1/740	35/21795	0.701787	0.978907	TRINITY_DN76232_c4_g1_i1	http://amigo.geneontology.org/amigo/term/GO:0030104	BP	1
GO:0030433	ubiquitin-dependent ERAD pathway	1/740	35/21795	0.701787	0.978907	TRINITY_DN90238_c5_g3_i3	http://amigo.geneontology.org/amigo/term/GO:0030433	BP	1
GO:0044273	sulfur compound catabolic process	3/740	106/21795	0.702647	0.979632	TRINITY_DN86907_c3_g4_i3;TRINITY_DN88582_c7_g2_i10;TRINITY_DN123479_c0_g1_i1	http://amigo.geneontology.org/amigo/term/GO:0044273	BP	3
GO:0006366	transcription from RNA polymerase II promoter	2/740	72/21795	0.706925	0.983075	TRINITY_DN71772_c1_g1_i1;TRINITY_DN86288_c3_g4_i1	http://amigo.geneontology.org/amigo/term/GO:0006366	BP	2
GO:0010051	xylem and phloem pattern formation	14/740	463/21795	0.70865	0.983075	TRINITY_DN15130_c1_g1_i1;TRINITY_DN68559_c0_g1_i2;TRINITY_DN70135_c0_g2_i3;TRINITY_DN74399_c0_g2_i2;TRINITY_DN75355_c1_g1_i13;TRINITY_DN79601_c8_g1_i4;TRINITY_DN79780_c4_g2_i1;TRINITY_DN82731_c0_g4_i2;TRINITY_DN84005_c0_g1_i6;TRINITY_DN86585_c0_g1_i8;TRINITY_DN86880_c1_g4_i2;TRINITY_DN89409_c1_g3_i3;TRINITY_DN92796_c5_g1_i1;TRINITY_DN92912_c1_g4_i1	http://amigo.geneontology.org/amigo/term/GO:0010051	BP	14
GO:0019220	regulation of phosphate metabolic process	7/740	240/21795	0.710204	0.983075	TRINITY_DN71557_c0_g1_i11;TRINITY_DN73594_c1_g1_i2;TRINITY_DN75913_c2_g1_i8;TRINITY_DN79488_c1_g6_i1;TRINITY_DN86288_c3_g4_i1;TRINITY_DN90953_c2_g2_i3;TRINITY_DN218260_c0_g1_i1	http://amigo.geneontology.org/amigo/term/GO:0019220	BP	7
GO:0000226	microtubule cytoskeleton organization	7/740	240/21795	0.710204	0.983075	TRINITY_DN76437_c5_g2_i1;TRINITY_DN77139_c0_g2_i1;TRINITY_DN77139_c0_g3_i1;TRINITY_DN79243_c1_g4_i2;TRINITY_DN84901_c3_g3_i1;TRINITY_DN88013_c3_g8_i1;TRINITY_DN91688_c1_g5_i4	http://amigo.geneontology.org/amigo/term/GO:0000226	BP	7
GO:0032268	regulation of cellular protein metabolic process	11/740	369/21795	0.711861	0.983075	TRINITY_DN65799_c0_g1_i3;TRINITY_DN66001_c0_g1_i2;TRINITY_DN71557_c0_g1_i11;TRINITY_DN71772_c1_g1_i1;TRINITY_DN73594_c1_g1_i2;TRINITY_DN75913_c2_g1_i8;TRINITY_DN79488_c1_g6_i1;TRINITY_DN80086_c0_g1_i1;TRINITY_DN80224_c0_g2_i1;TRINITY_DN86288_c3_g4_i1;TRINITY_DN94190_c2_g1_i20	http://amigo.geneontology.org/amigo/term/GO:0032268	BP	11
GO:0006626	protein targeting to mitochondrion	1/740	36/21795	0.711929	0.983075	TRINITY_DN77998_c1_g1_i8	http://amigo.geneontology.org/amigo/term/GO:0006626	BP	1
GO:0072655	establishment of protein localization to mitochondrion	1/740	36/21795	0.711929	0.983075	TRINITY_DN77998_c1_g1_i8	http://amigo.geneontology.org/amigo/term/GO:0072655	BP	1
GO:0006914	autophagy	1/740	36/21795	0.711929	0.983075	TRINITY_DN75000_c0_g2_i3	http://amigo.geneontology.org/amigo/term/GO:0006914	BP	1
GO:0009585	red, far-red light phototransduction	1/740	36/21795	0.711929	0.983075	TRINITY_DN73152_c1_g3_i1	http://amigo.geneontology.org/amigo/term/GO:0009585	BP	1
GO:0046854	phosphatidylinositol phosphorylation	1/740	36/21795	0.711929	0.983075	TRINITY_DN92028_c1_g2_i1	http://amigo.geneontology.org/amigo/term/GO:0046854	BP	1
GO:0016132	brassinosteroid biosynthetic process	1/740	36/21795	0.711929	0.983075	TRINITY_DN83523_c1_g2_i2	http://amigo.geneontology.org/amigo/term/GO:0016132	BP	1
GO:0070585	protein localization to mitochondrion	1/740	36/21795	0.711929	0.983075	TRINITY_DN77998_c1_g1_i8	http://amigo.geneontology.org/amigo/term/GO:0070585	BP	1
GO:0007602	phototransduction	1/740	36/21795	0.711929	0.983075	TRINITY_DN73152_c1_g3_i1	http://amigo.geneontology.org/amigo/term/GO:0007602	BP	1
GO:0006096	glycolytic process	2/740	73/21795	0.714078	0.983894	TRINITY_DN85255_c1_g1_i1;TRINITY_DN88654_c0_g2_i8	http://amigo.geneontology.org/amigo/term/GO:0006096	BP	2
GO:0009648	photoperiodism	3/740	108/21795	0.714568	0.983894	TRINITY_DN68780_c0_g2_i2;TRINITY_DN78980_c2_g2_i3;TRINITY_DN90204_c2_g3_i5	http://amigo.geneontology.org/amigo/term/GO:0009648	BP	3
GO:0015718	monocarboxylic acid transport	3/740	108/21795	0.714568	0.983894	TRINITY_DN72170_c3_g8_i1;TRINITY_DN72170_c3_g9_i1;TRINITY_DN91981_c0_g3_i2	http://amigo.geneontology.org/amigo/term/GO:0015718	BP	3
GO:0006260	DNA replication	11/740	370/21795	0.715124	0.984119	TRINITY_DN77419_c0_g1_i10;TRINITY_DN79458_c0_g1_i8;TRINITY_DN80331_c0_g6_i1;TRINITY_DN83949_c1_g2_i2;TRINITY_DN85716_c0_g1_i22;TRINITY_DN89459_c0_g1_i5;TRINITY_DN89667_c2_g1_i13;TRINITY_DN90194_c1_g2_i2;TRINITY_DN92530_c0_g2_i4;TRINITY_DN94190_c2_g1_i20;TRINITY_DN95317_c0_g12_i2	http://amigo.geneontology.org/amigo/term/GO:0006260	BP	11
GO:0051174	regulation of phosphorus metabolic process	7/740	242/21795	0.718201	0.987072	TRINITY_DN71557_c0_g1_i11;TRINITY_DN73594_c1_g1_i2;TRINITY_DN75913_c2_g1_i8;TRINITY_DN79488_c1_g6_i1;TRINITY_DN86288_c3_g4_i1;TRINITY_DN90953_c2_g2_i3;TRINITY_DN218260_c0_g1_i1	http://amigo.geneontology.org/amigo/term/GO:0051174	BP	7
GO:0050832	defense response to fungus	13/740	435/21795	0.719419	0.987072	TRINITY_DN64333_c0_g1_i2;TRINITY_DN65768_c0_g1_i1;TRINITY_DN70538_c0_g1_i1;TRINITY_DN75438_c0_g1_i1;TRINITY_DN77451_c0_g4_i1;TRINITY_DN77891_c0_g1_i1;TRINITY_DN77891_c1_g1_i5;TRINITY_DN79447_c3_g1_i1;TRINITY_DN82779_c7_g3_i2;TRINITY_DN84723_c0_g4_i1;TRINITY_DN86907_c3_g4_i3;TRINITY_DN91900_c4_g1_i3;TRINITY_DN93681_c1_g1_i2	http://amigo.geneontology.org/amigo/term/GO:0050832	BP	13
GO:0046486	glycerolipid metabolic process	4/740	143/21795	0.719721	0.987072	TRINITY_DN68864_c0_g1_i6;TRINITY_DN83157_c6_g4_i1;TRINITY_DN91267_c0_g4_i1;TRINITY_DN92028_c1_g2_i1	http://amigo.geneontology.org/amigo/term/GO:0046486	BP	4
GO:0030865	cortical cytoskeleton organization	2/740	74/21795	0.721084	0.987072	TRINITY_DN91688_c1_g5_i4;TRINITY_DN94495_c1_g1_i2	http://amigo.geneontology.org/amigo/term/GO:0030865	BP	2
GO:0002181	cytoplasmic translation	2/740	74/21795	0.721084	0.987072	TRINITY_DN80655_c2_g4_i2;TRINITY_DN84901_c3_g3_i1	http://amigo.geneontology.org/amigo/term/GO:0002181	BP	2
GO:0033014	tetrapyrrole biosynthetic process	2/740	74/21795	0.721084	0.987072	TRINITY_DN79615_c0_g4_i2;TRINITY_DN93213_c0_g3_i8	http://amigo.geneontology.org/amigo/term/GO:0033014	BP	2
GO:0016042	lipid catabolic process	6/740	210/21795	0.721382	0.987072	TRINITY_DN73481_c7_g1_i1;TRINITY_DN73693_c0_g3_i2;TRINITY_DN79971_c0_g2_i4;TRINITY_DN91192_c0_g11_i1;TRINITY_DN93786_c0_g2_i1;TRINITY_DN95812_c1_g1_i9	http://amigo.geneontology.org/amigo/term/GO:0016042	BP	6
GO:0006112	energy reserve metabolic process	1/740	37/21795	0.721726	0.987072	TRINITY_DN76717_c5_g1_i1	http://amigo.geneontology.org/amigo/term/GO:0006112	BP	1
GO:0043631	RNA polyadenylation	1/740	37/21795	0.721726	0.987072	TRINITY_DN78441_c2_g1_i5	http://amigo.geneontology.org/amigo/term/GO:0043631	BP	1
GO:0061061	muscle structure development	1/740	37/21795	0.721726	0.987072	TRINITY_DN94190_c2_g1_i20	http://amigo.geneontology.org/amigo/term/GO:0061061	BP	1
GO:0071395	cellular response to jasmonic acid stimulus	5/740	177/21795	0.721949	0.987072	TRINITY_DN64892_c0_g1_i1;TRINITY_DN67988_c0_g1_i1;TRINITY_DN74753_c0_g1_i1;TRINITY_DN93265_c2_g2_i1;TRINITY_DN94607_c2_g2_i10	http://amigo.geneontology.org/amigo/term/GO:0071395	BP	5
GO:0015931	nucleobase-containing compound transport	5/740	177/21795	0.721949	0.987072	TRINITY_DN58320_c0_g2_i1;TRINITY_DN66246_c0_g1_i1;TRINITY_DN77451_c0_g4_i1;TRINITY_DN82761_c0_g1_i6;TRINITY_DN84932_c0_g1_i4	http://amigo.geneontology.org/amigo/term/GO:0015931	BP	5
GO:0003333	amino acid transmembrane transport	4/740	144/21795	0.724767	0.98944	TRINITY_DN70887_c0_g1_i2;TRINITY_DN74807_c2_g1_i3;TRINITY_DN88544_c0_g3_i4;TRINITY_DN90456_c1_g1_i1	http://amigo.geneontology.org/amigo/term/GO:0003333	BP	4
GO:0010101	post-embryonic root morphogenesis	4/740	145/21795	0.729744	0.992613	TRINITY_DN73792_c0_g1_i3;TRINITY_DN75510_c0_g5_i4;TRINITY_DN78637_c1_g1_i3;TRINITY_DN85439_c1_g1_i2	http://amigo.geneontology.org/amigo/term/GO:0010101	BP	4
GO:0010102	lateral root morphogenesis	4/740	145/21795	0.729744	0.992613	TRINITY_DN73792_c0_g1_i3;TRINITY_DN75510_c0_g5_i4;TRINITY_DN78637_c1_g1_i3;TRINITY_DN85439_c1_g1_i2	http://amigo.geneontology.org/amigo/term/GO:0010102	BP	4
GO:0051338	regulation of transferase activity	4/740	145/21795	0.729744	0.992613	TRINITY_DN71557_c0_g1_i11;TRINITY_DN73594_c1_g1_i2;TRINITY_DN75913_c2_g1_i8;TRINITY_DN86288_c3_g4_i1	http://amigo.geneontology.org/amigo/term/GO:0051338	BP	4
GO:0051783	regulation of nuclear division	1/740	38/21795	0.73119	0.992613	TRINITY_DN85106_c2_g3_i3	http://amigo.geneontology.org/amigo/term/GO:0051783	BP	1
GO:0016579	protein deubiquitination	1/740	38/21795	0.73119	0.992613	TRINITY_DN71772_c1_g1_i1	http://amigo.geneontology.org/amigo/term/GO:0016579	BP	1
GO:0008406	gonad development	1/740	38/21795	0.73119	0.992613	TRINITY_DN86288_c3_g4_i1	http://amigo.geneontology.org/amigo/term/GO:0008406	BP	1
GO:0009767	photosynthetic electron transport chain	1/740	38/21795	0.73119	0.992613	TRINITY_DN81945_c0_g8_i2	http://amigo.geneontology.org/amigo/term/GO:0009767	BP	1
GO:0046834	lipid phosphorylation	1/740	38/21795	0.73119	0.992613	TRINITY_DN92028_c1_g2_i1	http://amigo.geneontology.org/amigo/term/GO:0046834	BP	1
GO:0006521	regulation of cellular amino acid metabolic process	1/740	38/21795	0.73119	0.992613	TRINITY_DN68815_c0_g1_i1	http://amigo.geneontology.org/amigo/term/GO:0006521	BP	1
GO:0010948	negative regulation of cell cycle process	3/740	111/21795	0.731752	0.992613	TRINITY_DN71239_c1_g1_i7;TRINITY_DN85106_c2_g3_i3;TRINITY_DN86288_c3_g4_i1	http://amigo.geneontology.org/amigo/term/GO:0010948	BP	3
GO:0010039	response to iron ion	2/740	76/21795	0.734662	0.994481	TRINITY_DN78565_c0_g1_i1;TRINITY_DN86711_c0_g1_i2	http://amigo.geneontology.org/amigo/term/GO:0010039	BP	2
GO:0006306	DNA methylation	3/740	112/21795	0.737296	0.996178	TRINITY_DN77123_c1_g2_i8;TRINITY_DN84723_c0_g4_i1;TRINITY_DN93493_c1_g2_i5	http://amigo.geneontology.org/amigo/term/GO:0006306	BP	3
GO:0051274	beta-glucan biosynthetic process	3/740	112/21795	0.737296	0.996178	TRINITY_DN74169_c0_g7_i1;TRINITY_DN87396_c1_g3_i1;TRINITY_DN87396_c1_g2_i6	http://amigo.geneontology.org/amigo/term/GO:0051274	BP	3
GO:0009644	response to high light intensity	5/740	181/21795	0.73979	0.996788	TRINITY_DN75808_c2_g1_i1;TRINITY_DN79343_c0_g1_i2;TRINITY_DN81892_c1_g7_i4;TRINITY_DN95543_c0_g1_i1;TRINITY_DN95543_c1_g3_i1	http://amigo.geneontology.org/amigo/term/GO:0009644	BP	5
GO:0009638	phototropism	1/740	39/21795	0.740333	0.996788	TRINITY_DN81011_c0_g2_i4	http://amigo.geneontology.org/amigo/term/GO:0009638	BP	1
GO:0045787	positive regulation of cell cycle	1/740	39/21795	0.740333	0.996788	TRINITY_DN95457_c5_g4_i1	http://amigo.geneontology.org/amigo/term/GO:0045787	BP	1
GO:0048235	pollen sperm cell differentiation	1/740	39/21795	0.740333	0.996788	TRINITY_DN89177_c0_g2_i5	http://amigo.geneontology.org/amigo/term/GO:0048235	BP	1
GO:0006094	gluconeogenesis	1/740	39/21795	0.740333	0.996788	TRINITY_DN88654_c0_g2_i8	http://amigo.geneontology.org/amigo/term/GO:0006094	BP	1
GO:0009058	biosynthetic process	133/740	4103/21795	0.740856	0.996788	TRINITY_DN43850_c0_g1_i1;TRINITY_DN48212_c0_g1_i1;TRINITY_DN49697_c0_g1_i1;TRINITY_DN54042_c0_g1_i1;TRINITY_DN63938_c0_g1_i1;TRINITY_DN65523_c0_g1_i1;TRINITY_DN65799_c0_g1_i3;TRINITY_DN66170_c0_g1_i1;TRINITY_DN67629_c0_g1_i1;TRINITY_DN68223_c0_g1_i1;TRINITY_DN68864_c0_g1_i6;TRINITY_DN69285_c0_g1_i1;TRINITY_DN69553_c0_g1_i1;TRINITY_DN70263_c0_g1_i2;TRINITY_DN70511_c0_g2_i2;TRINITY_DN70539_c0_g1_i1…	http://amigo.geneontology.org/amigo/term/GO:0009058	BP	133
GO:0048573	photoperiodism, flowering	2/740	77/21795	0.741237	0.996836	TRINITY_DN68780_c0_g2_i2;TRINITY_DN78980_c2_g2_i3	http://amigo.geneontology.org/amigo/term/GO:0048573	BP	2
GO:0061024	membrane organization	6/740	215/21795	0.741897	0.997258	TRINITY_DN69022_c0_g1_i1;TRINITY_DN73631_c1_g2_i1;TRINITY_DN74186_c0_g1_i3;TRINITY_DN75000_c0_g2_i3;TRINITY_DN86288_c3_g4_i1;TRINITY_DN92028_c1_g2_i1	http://amigo.geneontology.org/amigo/term/GO:0061024	BP	6
GO:0034614	cellular response to reactive oxygen species	3/740	113/21795	0.742749	0.997939	TRINITY_DN79971_c0_g2_i4;TRINITY_DN90204_c2_g3_i5;TRINITY_DN95935_c2_g1_i2	http://amigo.geneontology.org/amigo/term/GO:0034614	BP	3
GO:0009250	glucan biosynthetic process	4/740	148/21795	0.744273	0.999471	TRINITY_DN70263_c0_g1_i2;TRINITY_DN74169_c0_g7_i1;TRINITY_DN87396_c1_g3_i1;TRINITY_DN87396_c1_g2_i6	http://amigo.geneontology.org/amigo/term/GO:0009250	BP	4
GO:0006813	potassium ion transport	3/740	114/21795	0.748112	0.999471	TRINITY_DN78735_c0_g6_i4;TRINITY_DN82498_c1_g1_i6;TRINITY_DN84843_c0_g1_i5	http://amigo.geneontology.org/amigo/term/GO:0006813	BP	3
GO:0051231	spindle elongation	1/740	40/21795	0.749165	0.999471	TRINITY_DN84901_c3_g3_i1	http://amigo.geneontology.org/amigo/term/GO:0051231	BP	1
GO:0000963	mitochondrial RNA processing	1/740	40/21795	0.749165	0.999471	TRINITY_DN80840_c1_g2_i3	http://amigo.geneontology.org/amigo/term/GO:0000963	BP	1
GO:0009559	embryo sac central cell differentiation	1/740	40/21795	0.749165	0.999471	TRINITY_DN90238_c5_g3_i3	http://amigo.geneontology.org/amigo/term/GO:0009559	BP	1
GO:0010197	polar nucleus fusion	1/740	40/21795	0.749165	0.999471	TRINITY_DN90238_c5_g3_i3	http://amigo.geneontology.org/amigo/term/GO:0010197	BP	1
GO:0010332	response to gamma radiation	1/740	40/21795	0.749165	0.999471	TRINITY_DN94218_c4_g1_i1	http://amigo.geneontology.org/amigo/term/GO:0010332	BP	1
GO:0000022	mitotic spindle elongation	1/740	40/21795	0.749165	0.999471	TRINITY_DN84901_c3_g3_i1	http://amigo.geneontology.org/amigo/term/GO:0000022	BP	1
GO:0007420	brain development	1/740	40/21795	0.749165	0.999471	TRINITY_DN86288_c3_g4_i1	http://amigo.geneontology.org/amigo/term/GO:0007420	BP	1
GO:1901987	regulation of cell cycle phase transition	3/740	115/21795	0.753384	1	TRINITY_DN72421_c2_g4_i3;TRINITY_DN85106_c2_g3_i3;TRINITY_DN86288_c3_g4_i1	http://amigo.geneontology.org/amigo/term/GO:1901987	BP	3
GO:0042752	regulation of circadian rhythm	4/740	150/21795	0.753623	1	TRINITY_DN73152_c1_g3_i1;TRINITY_DN77470_c1_g2_i1;TRINITY_DN94607_c2_g2_i10;TRINITY_DN96468_c1_g3_i2	http://amigo.geneontology.org/amigo/term/GO:0042752	BP	4
GO:0048666	neuron development	2/740	79/21795	0.75397	1	TRINITY_DN80224_c0_g2_i1;TRINITY_DN86288_c3_g4_i1	http://amigo.geneontology.org/amigo/term/GO:0048666	BP	2
GO:0009561	megagametogenesis	2/740	79/21795	0.75397	1	TRINITY_DN82632_c1_g2_i2;TRINITY_DN90238_c5_g3_i3	http://amigo.geneontology.org/amigo/term/GO:0009561	BP	2
GO:0051345	positive regulation of hydrolase activity	2/740	79/21795	0.75397	1	TRINITY_DN90953_c2_g2_i3;TRINITY_DN218260_c0_g1_i1	http://amigo.geneontology.org/amigo/term/GO:0051345	BP	2
GO:0009853	photorespiration	2/740	79/21795	0.75397	1	TRINITY_DN77283_c0_g1_i4;TRINITY_DN77283_c0_g5_i1	http://amigo.geneontology.org/amigo/term/GO:0009853	BP	2
GO:0017004	cytochrome complex assembly	1/740	41/21795	0.757697	1	TRINITY_DN78350_c0_g1_i4	http://amigo.geneontology.org/amigo/term/GO:0017004	BP	1
GO:0000082	G1/S transition of mitotic cell cycle	1/740	41/21795	0.757697	1	TRINITY_DN86288_c3_g4_i1	http://amigo.geneontology.org/amigo/term/GO:0000082	BP	1
GO:0071616	acyl-CoA biosynthetic process	1/740	41/21795	0.757697	1	TRINITY_DN212533_c0_g1_i1	http://amigo.geneontology.org/amigo/term/GO:0071616	BP	1
GO:0006986	response to unfolded protein	1/740	41/21795	0.757697	1	TRINITY_DN69285_c0_g1_i1	http://amigo.geneontology.org/amigo/term/GO:0006986	BP	1
GO:0018996	molting cycle, collagen and cuticulin-based cuticle	1/740	41/21795	0.757697	1	TRINITY_DN84901_c3_g3_i1	http://amigo.geneontology.org/amigo/term/GO:0018996	BP	1
GO:0046916	cellular transition metal ion homeostasis	3/740	116/21795	0.758568	1	TRINITY_DN74269_c0_g3_i1;TRINITY_DN74269_c0_g1_i10;TRINITY_DN90136_c5_g5_i2	http://amigo.geneontology.org/amigo/term/GO:0046916	BP	3
GO:0006721	terpenoid metabolic process	6/740	220/21795	0.761307	1	TRINITY_DN64333_c0_g1_i2;TRINITY_DN71536_c0_g1_i2;TRINITY_DN71536_c0_g2_i4;TRINITY_DN73481_c7_g1_i1;TRINITY_DN73693_c0_g3_i2;TRINITY_DN94760_c0_g2_i1	http://amigo.geneontology.org/amigo/term/GO:0006721	BP	6
GO:0009620	response to fungus	17/740	578/21795	0.761516	1	TRINITY_DN64333_c0_g1_i2;TRINITY_DN65768_c0_g1_i1;TRINITY_DN70538_c0_g1_i1;TRINITY_DN75438_c0_g1_i1;TRINITY_DN76129_c4_g2_i1;TRINITY_DN77451_c0_g4_i1;TRINITY_DN77891_c0_g1_i1;TRINITY_DN77891_c1_g1_i5;TRINITY_DN79447_c3_g1_i1;TRINITY_DN82128_c1_g2_i2;TRINITY_DN82779_c7_g3_i2;TRINITY_DN84723_c0_g4_i1;TRINITY_DN86907_c3_g4_i3;TRINITY_DN88823_c0_g3_i1;TRINITY_DN91900_c4_g1_i3;TRINITY_DN93681_c1_g1_i2…	http://amigo.geneontology.org/amigo/term/GO:0009620	BP	17
GO:0019954	asexual reproduction	4/740	152/21795	0.762708	1	TRINITY_DN43850_c0_g1_i1;TRINITY_DN75000_c0_g2_i3;TRINITY_DN89325_c2_g2_i6;TRINITY_DN96126_c2_g4_i3	http://amigo.geneontology.org/amigo/term/GO:0019954	BP	4
GO:0046479	glycosphingolipid catabolic process	1/740	42/21795	0.76594	1	TRINITY_DN93786_c0_g2_i1	http://amigo.geneontology.org/amigo/term/GO:0046479	BP	1
GO:0046477	glycosylceramide catabolic process	1/740	42/21795	0.76594	1	TRINITY_DN93786_c0_g2_i1	http://amigo.geneontology.org/amigo/term/GO:0046477	BP	1
GO:0015800	acidic amino acid transport	1/740	42/21795	0.76594	1	TRINITY_DN90456_c1_g1_i1	http://amigo.geneontology.org/amigo/term/GO:0015800	BP	1
GO:0046578	regulation of Ras protein signal transduction	1/740	42/21795	0.76594	1	TRINITY_DN218260_c0_g1_i1	http://amigo.geneontology.org/amigo/term/GO:0046578	BP	1
GO:0019377	glycolipid catabolic process	1/740	42/21795	0.76594	1	TRINITY_DN93786_c0_g2_i1	http://amigo.geneontology.org/amigo/term/GO:0019377	BP	1
GO:0009880	embryonic pattern specification	2/740	81/21795	0.766159	1	TRINITY_DN81011_c0_g2_i4;TRINITY_DN89966_c3_g2_i2	http://amigo.geneontology.org/amigo/term/GO:0009880	BP	2
GO:1901264	carbohydrate derivative transport	3/740	118/21795	0.768671	1	TRINITY_DN82761_c0_g1_i6;TRINITY_DN84932_c0_g1_i4;TRINITY_DN91981_c0_g3_i2	http://amigo.geneontology.org/amigo/term/GO:1901264	BP	3
GO:0019725	cellular homeostasis	8/740	289/21795	0.768797	1	TRINITY_DN66576_c0_g1_i2;TRINITY_DN74269_c0_g3_i1;TRINITY_DN74269_c0_g1_i10;TRINITY_DN83913_c3_g5_i1;TRINITY_DN86288_c3_g4_i1;TRINITY_DN88917_c3_g2_i1;TRINITY_DN90136_c5_g5_i2;TRINITY_DN90204_c2_g3_i5	http://amigo.geneontology.org/amigo/term/GO:0019725	BP	8
GO:0022604	regulation of cell morphogenesis	4/740	154/21795	0.771531	1	TRINITY_DN69048_c0_g1_i1;TRINITY_DN74039_c0_g2_i1;TRINITY_DN77570_c2_g2_i2;TRINITY_DN87382_c0_g1_i2	http://amigo.geneontology.org/amigo/term/GO:0022604	BP	4
GO:0006470	protein dephosphorylation	2/740	82/21795	0.772055	1	TRINITY_DN73242_c7_g1_i9;TRINITY_DN75913_c2_g1_i8	http://amigo.geneontology.org/amigo/term/GO:0006470	BP	2
GO:0016116	carotenoid metabolic process	2/740	82/21795	0.772055	1	TRINITY_DN73481_c7_g1_i1;TRINITY_DN73693_c0_g3_i2	http://amigo.geneontology.org/amigo/term/GO:0016116	BP	2
GO:0043085	positive regulation of catalytic activity	6/740	223/21795	0.772426	1	TRINITY_DN73594_c1_g1_i2;TRINITY_DN80224_c0_g2_i1;TRINITY_DN86288_c3_g4_i1;TRINITY_DN87282_c0_g3_i2;TRINITY_DN90953_c2_g2_i3;TRINITY_DN218260_c0_g1_i1	http://amigo.geneontology.org/amigo/term/GO:0043085	BP	6
GO:0048509	regulation of meristem development	5/740	189/21795	0.772922	1	TRINITY_DN68780_c0_g2_i2;TRINITY_DN72421_c2_g4_i3;TRINITY_DN83197_c0_g1_i2;TRINITY_DN89084_c1_g2_i3;TRINITY_DN92298_c1_g5_i1	http://amigo.geneontology.org/amigo/term/GO:0048509	BP	5
GO:0015748	organophosphate ester transport	3/740	119/21795	0.773592	1	TRINITY_DN82761_c0_g1_i6;TRINITY_DN84932_c0_g1_i4;TRINITY_DN91981_c0_g3_i2	http://amigo.geneontology.org/amigo/term/GO:0015748	BP	3
GO:0009583	detection of light stimulus	1/740	43/21795	0.773902	1	TRINITY_DN73152_c1_g3_i1	http://amigo.geneontology.org/amigo/term/GO:0009583	BP	1
GO:0006487	protein N-linked glycosylation	1/740	43/21795	0.773902	1	TRINITY_DN69285_c0_g1_i1	http://amigo.geneontology.org/amigo/term/GO:0006487	BP	1
GO:0051056	regulation of small GTPase mediated signal transduction	1/740	43/21795	0.773902	1	TRINITY_DN218260_c0_g1_i1	http://amigo.geneontology.org/amigo/term/GO:0051056	BP	1
GO:0010099	regulation of photomorphogenesis	1/740	43/21795	0.773902	1	TRINITY_DN65230_c0_g2_i1	http://amigo.geneontology.org/amigo/term/GO:0010099	BP	1
GO:0000304	response to singlet oxygen	1/740	43/21795	0.773902	1	TRINITY_DN84755_c2_g5_i3	http://amigo.geneontology.org/amigo/term/GO:0000304	BP	1
GO:0010492	maintenance of shoot apical meristem identity	1/740	43/21795	0.773902	1	TRINITY_DN81280_c0_g1_i1	http://amigo.geneontology.org/amigo/term/GO:0010492	BP	1
GO:0051246	regulation of protein metabolic process	11/740	390/21795	0.775386	1	TRINITY_DN65799_c0_g1_i3;TRINITY_DN66001_c0_g1_i2;TRINITY_DN71557_c0_g1_i11;TRINITY_DN71772_c1_g1_i1;TRINITY_DN73594_c1_g1_i2;TRINITY_DN75913_c2_g1_i8;TRINITY_DN79488_c1_g6_i1;TRINITY_DN80086_c0_g1_i1;TRINITY_DN80224_c0_g2_i1;TRINITY_DN86288_c3_g4_i1;TRINITY_DN94190_c2_g1_i20	http://amigo.geneontology.org/amigo/term/GO:0051246	BP	11
GO:0034440	lipid oxidation	4/740	155/21795	0.775845	1	TRINITY_DN73792_c0_g1_i3;TRINITY_DN79971_c0_g2_i4;TRINITY_DN85439_c1_g1_i2;TRINITY_DN91192_c0_g11_i1	http://amigo.geneontology.org/amigo/term/GO:0034440	BP	4
GO:0044255	cellular lipid metabolic process	36/740	1183/21795	0.776686	1	TRINITY_DN63938_c0_g1_i1;TRINITY_DN64333_c0_g1_i2;TRINITY_DN67629_c0_g1_i1;TRINITY_DN68864_c0_g1_i6;TRINITY_DN69285_c0_g1_i1;TRINITY_DN69553_c0_g1_i1;TRINITY_DN70511_c0_g2_i2;TRINITY_DN71012_c0_g1_i1;TRINITY_DN71536_c0_g1_i2;TRINITY_DN71536_c0_g2_i4;TRINITY_DN71562_c3_g1_i1;TRINITY_DN72083_c0_g1_i4;TRINITY_DN73326_c0_g1_i1;TRINITY_DN73326_c0_g3_i3;TRINITY_DN73481_c7_g1_i1;TRINITY_DN73693_c0_g3_i2…	http://amigo.geneontology.org/amigo/term/GO:0044255	BP	36
GO:0006479	protein methylation	3/740	120/21795	0.778426	1	TRINITY_DN80593_c0_g6_i1;TRINITY_DN89640_c2_g2_i2;TRINITY_DN93466_c1_g3_i1	http://amigo.geneontology.org/amigo/term/GO:0006479	BP	3
GO:0010876	lipid localization	3/740	120/21795	0.778426	1	TRINITY_DN67443_c0_g1_i2;TRINITY_DN75068_c0_g3_i2;TRINITY_DN75068_c0_g4_i1	http://amigo.geneontology.org/amigo/term/GO:0010876	BP	3
GO:0048667	cell morphogenesis involved in neuron differentiation	1/740	44/21795	0.781594	1	TRINITY_DN80224_c0_g2_i1	http://amigo.geneontology.org/amigo/term/GO:0048667	BP	1
GO:0009765	photosynthesis, light harvesting	1/740	44/21795	0.781594	1	TRINITY_DN58158_c0_g1_i1	http://amigo.geneontology.org/amigo/term/GO:0009765	BP	1
GO:0006677	glycosylceramide metabolic process	1/740	44/21795	0.781594	1	TRINITY_DN93786_c0_g2_i1	http://amigo.geneontology.org/amigo/term/GO:0006677	BP	1
GO:0006739	NADP metabolic process	1/740	44/21795	0.781594	1	TRINITY_DN72895_c3_g2_i4	http://amigo.geneontology.org/amigo/term/GO:0006739	BP	1
GO:0051223	regulation of protein transport	1/740	44/21795	0.781594	1	TRINITY_DN75000_c0_g2_i3	http://amigo.geneontology.org/amigo/term/GO:0051223	BP	1
GO:0007417	central nervous system development	1/740	44/21795	0.781594	1	TRINITY_DN86288_c3_g4_i1	http://amigo.geneontology.org/amigo/term/GO:0007417	BP	1
GO:0016311	dephosphorylation	10/740	360/21795	0.78334	1	TRINITY_DN69821_c2_g1_i1;TRINITY_DN70263_c0_g1_i2;TRINITY_DN71557_c0_g1_i11;TRINITY_DN72450_c1_g5_i2;TRINITY_DN73242_c7_g1_i9;TRINITY_DN75732_c1_g1_i6;TRINITY_DN75913_c2_g1_i8;TRINITY_DN83157_c6_g4_i1;TRINITY_DN84005_c0_g1_i6;TRINITY_DN84314_c0_g2_i9	http://amigo.geneontology.org/amigo/term/GO:0016311	BP	10
GO:0006304	DNA modification	3/740	122/21795	0.787841	1	TRINITY_DN77123_c1_g2_i8;TRINITY_DN84723_c0_g4_i1;TRINITY_DN93493_c1_g2_i5	http://amigo.geneontology.org/amigo/term/GO:0006304	BP	3
GO:0002009	morphogenesis of an epithelium	2/740	85/21795	0.788968	1	TRINITY_DN69073_c2_g1_i1;TRINITY_DN94190_c2_g1_i20	http://amigo.geneontology.org/amigo/term/GO:0002009	BP	2
GO:0000741	karyogamy	1/740	45/21795	0.789024	1	TRINITY_DN90238_c5_g3_i3	http://amigo.geneontology.org/amigo/term/GO:0000741	BP	1
GO:0040020	regulation of meiotic nuclear division	1/740	45/21795	0.789024	1	TRINITY_DN71239_c1_g1_i7	http://amigo.geneontology.org/amigo/term/GO:0040020	BP	1
GO:0009788	negative regulation of abscisic acid-activated signaling pathway	1/740	45/21795	0.789024	1	TRINITY_DN68780_c0_g2_i2	http://amigo.geneontology.org/amigo/term/GO:0009788	BP	1
GO:0070201	regulation of establishment of protein localization	1/740	45/21795	0.789024	1	TRINITY_DN75000_c0_g2_i3	http://amigo.geneontology.org/amigo/term/GO:0070201	BP	1
GO:0009070	serine family amino acid biosynthetic process	1/740	45/21795	0.789024	1	TRINITY_DN86666_c2_g5_i1	http://amigo.geneontology.org/amigo/term/GO:0009070	BP	1
GO:0046514	ceramide catabolic process	1/740	45/21795	0.789024	1	TRINITY_DN93786_c0_g2_i1	http://amigo.geneontology.org/amigo/term/GO:0046514	BP	1
GO:0009408	response to heat	17/740	591/21795	0.791189	1	TRINITY_DN66170_c0_g1_i1;TRINITY_DN69362_c0_g1_i2;TRINITY_DN72127_c0_g4_i3;TRINITY_DN73577_c5_g1_i1;TRINITY_DN74411_c1_g1_i1;TRINITY_DN78565_c0_g1_i1;TRINITY_DN79063_c2_g2_i2;TRINITY_DN79063_c2_g4_i2;TRINITY_DN79343_c0_g1_i2;TRINITY_DN81892_c1_g7_i4;TRINITY_DN81916_c7_g2_i4;TRINITY_DN87313_c1_g1_i9;TRINITY_DN89551_c1_g4_i2;TRINITY_DN89960_c2_g3_i2;TRINITY_DN91428_c1_g5_i1;TRINITY_DN94882_c0_g4_i1…	http://amigo.geneontology.org/amigo/term/GO:0009408	BP	17
GO:0065002	intracellular protein transmembrane transport	3/740	123/21795	0.792423	1	TRINITY_DN71954_c3_g8_i3;TRINITY_DN89072_c0_g1_i1;TRINITY_DN92311_c0_g4_i4	http://amigo.geneontology.org/amigo/term/GO:0065002	BP	3
GO:0010075	regulation of meristem growth	3/740	123/21795	0.792423	1	TRINITY_DN83197_c0_g1_i2;TRINITY_DN89084_c1_g2_i3;TRINITY_DN92298_c1_g5_i1	http://amigo.geneontology.org/amigo/term/GO:0010075	BP	3
GO:0065009	regulation of molecular function	15/740	527/21795	0.792529	1	TRINITY_DN71557_c0_g1_i11;TRINITY_DN73386_c0_g5_i1;TRINITY_DN73594_c1_g1_i2;TRINITY_DN74828_c0_g1_i1;TRINITY_DN75913_c2_g1_i8;TRINITY_DN77570_c2_g2_i2;TRINITY_DN79488_c1_g6_i1;TRINITY_DN80086_c0_g1_i1;TRINITY_DN80224_c0_g2_i1;TRINITY_DN80442_c2_g1_i2;TRINITY_DN82632_c1_g2_i2;TRINITY_DN86288_c3_g4_i1;TRINITY_DN87282_c0_g3_i2;TRINITY_DN90953_c2_g2_i3;TRINITY_DN218260_c0_g1_i1	http://amigo.geneontology.org/amigo/term/GO:0065009	BP	15
GO:0006261	DNA-dependent DNA replication	7/740	263/21795	0.793084	1	TRINITY_DN77419_c0_g1_i10;TRINITY_DN80331_c0_g6_i1;TRINITY_DN83949_c1_g2_i2;TRINITY_DN85716_c0_g1_i22;TRINITY_DN89459_c0_g1_i5;TRINITY_DN90194_c1_g2_i2;TRINITY_DN95317_c0_g12_i2	http://amigo.geneontology.org/amigo/term/GO:0006261	BP	7
GO:0044265	cellular macromolecule catabolic process	16/740	560/21795	0.793958	1	TRINITY_DN71239_c1_g1_i7;TRINITY_DN71772_c1_g1_i1;TRINITY_DN74875_c0_g2_i3;TRINITY_DN76249_c2_g1_i6;TRINITY_DN76437_c5_g2_i1;TRINITY_DN77139_c0_g2_i1;TRINITY_DN77139_c0_g3_i1;TRINITY_DN80224_c0_g2_i1;TRINITY_DN81710_c1_g6_i1;TRINITY_DN85716_c0_g1_i22;TRINITY_DN86288_c3_g4_i1;TRINITY_DN88013_c3_g8_i1;TRINITY_DN89072_c0_g1_i1;TRINITY_DN90238_c5_g3_i3;TRINITY_DN92311_c0_g4_i4;TRINITY_DN95963_c2_g3_i2	http://amigo.geneontology.org/amigo/term/GO:0044265	BP	16
[truncated: 1,309 more rows]

## Sheet: OE12 vs CK_GO_Enrichment
Table S10 The GO terms for enrichment of DEGs in OE12 vs CK
[truncated: 2,914 more rows]
