# Supplementary material for: Overexpression of Lol-miR11467 negatively affects osmotic resistance in Larix kaempferi 3 × L. gmelinii 9
Source: BMC Plant Biol. 2025 May 6;25:592. doi: 10.1186/s12870-025-06591-x (PMC12054245; doi:10.1186/s12870-025-06591-x)
Supplement: Supplementary file 14 — Supplementary Material 14 [file 12870_2025_6591_MOESM14_ESM.xlsx]

## Sheet: OE3 vs CK_KEGG_Enrichment
Table S11 The KEGG enrichment of DEGs in OE3 vs CK
ID	Term	GeneRatio	BgRatio	pvalue	qvalue	Genes	Input Hyperlink	Count
ko00940	Phenylpropanoid biosynthesis	43/779	378/25278	1.86688e-13	6.64611e-11	TRINITY_DN65523_c0_g1_i1;TRINITY_DN66449_c1_g1_i1;TRINITY_DN67749_c0_g1_i3;TRINITY_DN69214_c0_g1_i1;TRINITY_DN69814_c0_g1_i4;TRINITY_DN70625_c0_g2_i1;TRINITY_DN71185_c0_g3_i4;TRINITY_DN71247_c1_g1_i1;TRINITY_DN71532_c0_g1_i1;TRINITY_DN72351_c0_g5_i1;TRINITY_DN72351_c0_g3_i4;TRINITY_DN75840_c0_g1_i1;TRINITY_DN76658_c1_g2_i3;TRINITY_DN77464_c0_g1_i6;TRINITY_DN77728_c3_g4_i1;TRINITY_DN80088_c0_g1_i5…	http://www.kegg.jp/kegg-bin/show_pathway?ko00940	43
ko00430	Taurine and hypotaurine metabolism	14/779	39/25278	4.5845e-12	8.16041e-10	TRINITY_DN63681_c0_g1_i1;TRINITY_DN73707_c0_g2_i2;TRINITY_DN73888_c0_g3_i2;TRINITY_DN73888_c0_g2_i3;TRINITY_DN73888_c0_g1_i4;TRINITY_DN78566_c2_g2_i2;TRINITY_DN82427_c0_g1_i3;TRINITY_DN82427_c0_g2_i8;TRINITY_DN86368_c2_g2_i1;TRINITY_DN92365_c0_g7_i4;TRINITY_DN95169_c0_g1_i2;TRINITY_DN95169_c2_g4_i1;TRINITY_DN95169_c2_g2_i14;TRINITY_DN96562_c9_g1_i1	http://www.kegg.jp/kegg-bin/show_pathway?ko00430	14
ko00941	Flavonoid biosynthesis	26/779	181/25278	7.00957e-11	8.31802e-09	TRINITY_DN47199_c0_g1_i1;TRINITY_DN71247_c1_g1_i1;TRINITY_DN72482_c0_g2_i1;TRINITY_DN76557_c0_g2_i4;TRINITY_DN76557_c0_g5_i1;TRINITY_DN76718_c2_g4_i1;TRINITY_DN77590_c0_g5_i1;TRINITY_DN77590_c0_g8_i1;TRINITY_DN78712_c1_g3_i2;TRINITY_DN82735_c0_g4_i1;TRINITY_DN85132_c3_g1_i3;TRINITY_DN85524_c1_g2_i6;TRINITY_DN88507_c1_g1_i5;TRINITY_DN89151_c0_g1_i9;TRINITY_DN90401_c1_g3_i1;TRINITY_DN90401_c1_g2_i3…	http://www.kegg.jp/kegg-bin/show_pathway?ko00941	26
ko04727	GABAergic synapse	16/779	66/25278	1.1547e-10	1.02768e-08	TRINITY_DN63681_c0_g1_i1;TRINITY_DN65778_c0_g1_i1;TRINITY_DN73707_c0_g2_i2;TRINITY_DN73888_c0_g3_i2;TRINITY_DN73888_c0_g2_i3;TRINITY_DN73888_c0_g1_i4;TRINITY_DN79988_c4_g1_i2;TRINITY_DN82427_c0_g1_i3;TRINITY_DN82427_c0_g2_i8;TRINITY_DN86368_c2_g2_i1;TRINITY_DN92365_c0_g7_i4;TRINITY_DN95169_c0_g1_i2;TRINITY_DN95169_c2_g4_i1;TRINITY_DN95169_c2_g2_i14;TRINITY_DN96562_c9_g1_i1;TRINITY_DN160181_c0_g1_…	http://www.kegg.jp/kegg-bin/show_pathway?ko04727	16
ko04940	Type I diabetes mellitus	13/779	60/25278	2.77915e-08	1.97875e-06	TRINITY_DN63681_c0_g1_i1;TRINITY_DN73707_c0_g2_i2;TRINITY_DN73888_c0_g3_i2;TRINITY_DN73888_c0_g2_i3;TRINITY_DN73888_c0_g1_i4;TRINITY_DN82427_c0_g1_i3;TRINITY_DN82427_c0_g2_i8;TRINITY_DN86368_c2_g2_i1;TRINITY_DN92365_c0_g7_i4;TRINITY_DN95169_c0_g1_i2;TRINITY_DN95169_c2_g4_i1;TRINITY_DN95169_c2_g2_i14;TRINITY_DN96562_c9_g1_i1	http://www.kegg.jp/kegg-bin/show_pathway?ko04940	13
ko00199	Cytochrome P450	30/779	312/25278	4.29703e-08	2.54957e-06	TRINITY_DN47199_c0_g1_i1;TRINITY_DN64333_c0_g1_i2;TRINITY_DN67401_c0_g4_i1;TRINITY_DN69553_c0_g1_i1;TRINITY_DN69661_c0_g2_i1;TRINITY_DN71247_c1_g1_i1;TRINITY_DN71536_c0_g1_i2;TRINITY_DN71536_c0_g2_i4;TRINITY_DN72010_c2_g1_i1;TRINITY_DN72701_c3_g1_i4;TRINITY_DN72719_c1_g8_i2;TRINITY_DN72719_c1_g10_i3;TRINITY_DN74000_c1_g1_i2;TRINITY_DN74279_c0_g2_i4;TRINITY_DN75338_c0_g1_i1;TRINITY_DN75338_c0_g4_i…	http://www.kegg.jp/kegg-bin/show_pathway?ko00199	30
ko00980	Metabolism of xenobiotics by cytochrome P450	21/779	201/25278	1.18522e-06	6.02768e-05	TRINITY_DN72010_c2_g1_i1;TRINITY_DN72144_c3_g1_i1;TRINITY_DN72719_c1_g8_i2;TRINITY_DN72719_c1_g10_i3;TRINITY_DN74000_c1_g1_i2;TRINITY_DN74279_c0_g2_i4;TRINITY_DN75338_c0_g1_i1;TRINITY_DN75338_c0_g4_i1;TRINITY_DN78546_c5_g3_i2;TRINITY_DN81698_c0_g3_i1;TRINITY_DN88003_c3_g5_i2;TRINITY_DN88382_c0_g2_i1;TRINITY_DN89556_c3_g4_i2;TRINITY_DN89925_c1_g1_i1;TRINITY_DN90007_c0_g4_i3;TRINITY_DN91427_c7_g2_i…	http://www.kegg.jp/kegg-bin/show_pathway?ko00980	21
ko05204	Chemical carcinogenesis	20/779	190/25278	1.88377e-06	8.38279e-05	TRINITY_DN72010_c2_g1_i1;TRINITY_DN72144_c3_g1_i1;TRINITY_DN72719_c1_g8_i2;TRINITY_DN72719_c1_g10_i3;TRINITY_DN74000_c1_g1_i2;TRINITY_DN74279_c0_g2_i4;TRINITY_DN75338_c0_g1_i1;TRINITY_DN75338_c0_g4_i1;TRINITY_DN78546_c5_g3_i2;TRINITY_DN81698_c0_g3_i1;TRINITY_DN88003_c3_g5_i2;TRINITY_DN88382_c0_g2_i1;TRINITY_DN89556_c3_g4_i2;TRINITY_DN89925_c1_g1_i1;TRINITY_DN90007_c0_g4_i3;TRINITY_DN91427_c7_g2_i…	http://www.kegg.jp/kegg-bin/show_pathway?ko05204	20
ko00650	Butanoate metabolism	14/779	105/25278	4.25395e-06	0.000168267	TRINITY_DN63681_c0_g1_i1;TRINITY_DN67334_c0_g3_i3;TRINITY_DN73707_c0_g2_i2;TRINITY_DN73888_c0_g3_i2;TRINITY_DN73888_c0_g2_i3;TRINITY_DN73888_c0_g1_i4;TRINITY_DN82427_c0_g1_i3;TRINITY_DN82427_c0_g2_i8;TRINITY_DN86368_c2_g2_i1;TRINITY_DN92365_c0_g7_i4;TRINITY_DN95169_c0_g1_i2;TRINITY_DN95169_c2_g4_i1;TRINITY_DN95169_c2_g2_i14;TRINITY_DN96562_c9_g1_i1	http://www.kegg.jp/kegg-bin/show_pathway?ko00650	14
ko00410	beta-Alanine metabolism	18/779	180/25278	1.24252e-05	0.000442338	TRINITY_DN63681_c0_g1_i1;TRINITY_DN70600_c0_g1_i1;TRINITY_DN71668_c0_g1_i1;TRINITY_DN73707_c0_g2_i2;TRINITY_DN73888_c0_g3_i2;TRINITY_DN73888_c0_g2_i3;TRINITY_DN73888_c0_g1_i4;TRINITY_DN82427_c0_g1_i3;TRINITY_DN82427_c0_g2_i8;TRINITY_DN86368_c2_g2_i1;TRINITY_DN90408_c0_g6_i1;TRINITY_DN92365_c0_g7_i4;TRINITY_DN93805_c2_g1_i3;TRINITY_DN94677_c4_g1_i1;TRINITY_DN95169_c0_g1_i2;TRINITY_DN95169_c2_g4_i1…	http://www.kegg.jp/kegg-bin/show_pathway?ko00410	18
ko00830	Retinol metabolism	14/779	120/25278	2.02911e-05	0.000656693	TRINITY_DN72010_c2_g1_i1;TRINITY_DN72701_c3_g1_i4;TRINITY_DN72719_c1_g8_i2;TRINITY_DN72719_c1_g10_i3;TRINITY_DN74000_c1_g1_i2;TRINITY_DN74279_c0_g2_i4;TRINITY_DN75338_c0_g1_i1;TRINITY_DN75338_c0_g4_i1;TRINITY_DN78546_c5_g3_i2;TRINITY_DN89556_c3_g4_i2;TRINITY_DN90007_c0_g4_i3;TRINITY_DN93289_c0_g2_i1;TRINITY_DN94260_c1_g1_i6;TRINITY_DN97053_c3_g2_i11	http://www.kegg.jp/kegg-bin/show_pathway?ko00830	14
ko02024	Quorum sensing	21/779	245/25278	2.60344e-05	0.000735803	TRINITY_DN63681_c0_g1_i1;TRINITY_DN66491_c1_g2_i4;TRINITY_DN72451_c0_g1_i2;TRINITY_DN73707_c0_g2_i2;TRINITY_DN73888_c0_g3_i2;TRINITY_DN73888_c0_g2_i3;TRINITY_DN73888_c0_g1_i4;TRINITY_DN74709_c3_g6_i1;TRINITY_DN77975_c2_g2_i1;TRINITY_DN77975_c2_g1_i3;TRINITY_DN81835_c2_g1_i3;TRINITY_DN82427_c0_g1_i3;TRINITY_DN82427_c0_g2_i8;TRINITY_DN86368_c2_g2_i1;TRINITY_DN91952_c0_g1_i4;TRINITY_DN92365_c0_g7_i4…	http://www.kegg.jp/kegg-bin/show_pathway?ko02024	21
ko00140	Steroid hormone biosynthesis	14/779	123/25278	2.68692e-05	0.000735803	TRINITY_DN65237_c0_g1_i1;TRINITY_DN72010_c2_g1_i1;TRINITY_DN72719_c1_g8_i2;TRINITY_DN72719_c1_g10_i3;TRINITY_DN74000_c1_g1_i2;TRINITY_DN74279_c0_g2_i4;TRINITY_DN75338_c0_g1_i1;TRINITY_DN75338_c0_g4_i1;TRINITY_DN78546_c5_g3_i2;TRINITY_DN82793_c0_g1_i6;TRINITY_DN87268_c0_g3_i1;TRINITY_DN89556_c3_g4_i2;TRINITY_DN90007_c0_g4_i3;TRINITY_DN94260_c1_g1_i6	http://www.kegg.jp/kegg-bin/show_pathway?ko00140	14
ko00380	Tryptophan metabolism	17/779	188/25278	7.72744e-05	0.00196498	TRINITY_DN70600_c0_g1_i1;TRINITY_DN72010_c2_g1_i1;TRINITY_DN72719_c1_g8_i2;TRINITY_DN72719_c1_g10_i3;TRINITY_DN74000_c1_g1_i2;TRINITY_DN74279_c0_g2_i4;TRINITY_DN74358_c9_g6_i1;TRINITY_DN75338_c0_g1_i1;TRINITY_DN75338_c0_g4_i1;TRINITY_DN78368_c1_g5_i1;TRINITY_DN78546_c5_g3_i2;TRINITY_DN82731_c0_g4_i2;TRINITY_DN89409_c1_g3_i3;TRINITY_DN89556_c3_g4_i2;TRINITY_DN90007_c0_g4_i3;TRINITY_DN90204_c2_g3_i…	http://www.kegg.jp/kegg-bin/show_pathway?ko00380	17
ko00250	Alanine, aspartate and glutamate metabolism	18/779	208/25278	8.50543e-05	0.00201862	TRINITY_DN63681_c0_g1_i1;TRINITY_DN65778_c0_g1_i1;TRINITY_DN71723_c2_g1_i1;TRINITY_DN73707_c0_g2_i2;TRINITY_DN73888_c0_g3_i2;TRINITY_DN73888_c0_g2_i3;TRINITY_DN73888_c0_g1_i4;TRINITY_DN82427_c0_g1_i3;TRINITY_DN82427_c0_g2_i8;TRINITY_DN84703_c6_g1_i1;TRINITY_DN86368_c2_g2_i1;TRINITY_DN92365_c0_g7_i4;TRINITY_DN92577_c0_g1_i5;TRINITY_DN95169_c0_g1_i2;TRINITY_DN95169_c2_g4_i1;TRINITY_DN95169_c2_g2_i1…	http://www.kegg.jp/kegg-bin/show_pathway?ko00250	18
ko00040	Pentose and glucuronate interconversions	20/779	250/25278	0.00010496	0.00233536	TRINITY_DN67350_c0_g1_i1;TRINITY_DN68994_c0_g1_i2;TRINITY_DN71355_c0_g1_i1;TRINITY_DN71497_c0_g1_i1;TRINITY_DN72174_c0_g1_i2;TRINITY_DN72451_c0_g1_i2;TRINITY_DN74709_c3_g6_i1;TRINITY_DN74830_c0_g1_i3;TRINITY_DN75535_c0_g5_i1;TRINITY_DN77367_c0_g1_i1;TRINITY_DN77975_c2_g2_i1;TRINITY_DN77975_c2_g1_i3;TRINITY_DN79535_c0_g3_i3;TRINITY_DN79535_c0_g2_i3;TRINITY_DN84406_c0_g2_i2;TRINITY_DN84406_c0_g1_i8…	http://www.kegg.jp/kegg-bin/show_pathway?ko00040	20
ko04913	Ovarian Steroidogenesis	12/779	107/25278	0.000114834	0.00240476	TRINITY_DN72010_c2_g1_i1;TRINITY_DN72719_c1_g8_i2;TRINITY_DN72719_c1_g10_i3;TRINITY_DN74000_c1_g1_i2;TRINITY_DN74279_c0_g2_i4;TRINITY_DN75338_c0_g1_i1;TRINITY_DN75338_c0_g4_i1;TRINITY_DN78546_c5_g3_i2;TRINITY_DN87268_c0_g3_i1;TRINITY_DN89556_c3_g4_i2;TRINITY_DN90007_c0_g4_i3;TRINITY_DN94260_c1_g1_i6	http://www.kegg.jp/kegg-bin/show_pathway?ko04913	12
ko04710	Circadian rhythm	12/779	130/25278	0.000702988	0.013767	TRINITY_DN74802_c4_g3_i1;TRINITY_DN76437_c5_g2_i1;TRINITY_DN77139_c0_g2_i1;TRINITY_DN77139_c0_g3_i1;TRINITY_DN78742_c2_g2_i1;TRINITY_DN81757_c2_g1_i6;TRINITY_DN82498_c0_g4_i1;TRINITY_DN82498_c0_g2_i4;TRINITY_DN82498_c1_g1_i6;TRINITY_DN82498_c1_g5_i1;TRINITY_DN88013_c3_g8_i1;TRINITY_DN95667_c2_g1_i7	http://www.kegg.jp/kegg-bin/show_pathway?ko04710	12
ko03000	Transcription factors	44/779	858/25278	0.000734758	0.013767	TRINITY_DN62693_c0_g1_i1;TRINITY_DN67856_c0_g1_i1;TRINITY_DN68539_c0_g1_i1;TRINITY_DN68780_c0_g2_i2;TRINITY_DN68885_c0_g1_i1;TRINITY_DN69766_c0_g2_i1;TRINITY_DN69811_c0_g2_i1;TRINITY_DN70450_c0_g1_i1;TRINITY_DN70539_c0_g1_i1;TRINITY_DN70682_c0_g1_i1;TRINITY_DN70871_c0_g1_i1;TRINITY_DN71019_c0_g1_i1;TRINITY_DN72522_c0_g1_i2;TRINITY_DN74175_c1_g3_i2;TRINITY_DN74407_c1_g5_i2;TRINITY_DN74764_c2_g1_i1…	http://www.kegg.jp/kegg-bin/show_pathway?ko03000	44
ko01001	Protein kinases	44/779	862/25278	0.000806795	0.0143609	TRINITY_DN72421_c2_g4_i3;TRINITY_DN72538_c0_g1_i2;TRINITY_DN73495_c1_g2_i3;TRINITY_DN73594_c1_g1_i2;TRINITY_DN74802_c4_g3_i1;TRINITY_DN74828_c0_g1_i1;TRINITY_DN76670_c3_g4_i3;TRINITY_DN77340_c1_g4_i2;TRINITY_DN77419_c0_g1_i10;TRINITY_DN77570_c2_g2_i2;TRINITY_DN78742_c2_g2_i1;TRINITY_DN79195_c5_g1_i1;TRINITY_DN79195_c5_g3_i1;TRINITY_DN79589_c0_g1_i2;TRINITY_DN79769_c0_g7_i2;TRINITY_DN80331_c0_g6_i…	http://www.kegg.jp/kegg-bin/show_pathway?ko01001	44
ko00073	Cutin, suberine and wax biosynthesis	9/779	89/25278	0.00168923	0.0286365	TRINITY_DN63938_c0_g1_i1;TRINITY_DN69553_c0_g1_i1;TRINITY_DN73326_c0_g1_i1;TRINITY_DN73326_c0_g3_i3;TRINITY_DN73326_c0_g2_i7;TRINITY_DN87382_c1_g4_i1;TRINITY_DN91524_c0_g3_i2;TRINITY_DN91524_c0_g4_i2;TRINITY_DN94463_c0_g1_i3	http://www.kegg.jp/kegg-bin/show_pathway?ko00073	9
ko05418	Fluid shear stress and atherosclerosis	20/779	337/25278	0.00422971	0.0684444	TRINITY_DN65230_c0_g2_i1;TRINITY_DN67623_c0_g1_i1;TRINITY_DN72144_c3_g1_i1;TRINITY_DN74802_c4_g3_i1;TRINITY_DN78742_c2_g2_i1;TRINITY_DN81698_c0_g3_i1;TRINITY_DN81757_c2_g1_i6;TRINITY_DN82498_c0_g4_i1;TRINITY_DN82498_c0_g2_i4;TRINITY_DN82498_c1_g1_i6;TRINITY_DN82498_c1_g5_i1;TRINITY_DN88003_c3_g5_i2;TRINITY_DN88382_c0_g2_i1;TRINITY_DN89925_c1_g1_i1;TRINITY_DN91427_c7_g2_i3;TRINITY_DN92298_c1_g5_i1…	http://www.kegg.jp/kegg-bin/show_pathway?ko05418	20
ko00512	Mucin type O-glycan biosynthesis	3/779	12/25278	0.00520838	0.0768036	TRINITY_DN77164_c0_g2_i1;TRINITY_DN82472_c2_g1_i1;TRINITY_DN82472_c2_g3_i2	http://www.kegg.jp/kegg-bin/show_pathway?ko00512	3
ko00533	Glycosaminoglycan biosynthesis - keratan sulfate	3/779	12/25278	0.00520838	0.0768036	TRINITY_DN77164_c0_g2_i1;TRINITY_DN82472_c2_g1_i1;TRINITY_DN82472_c2_g3_i2	http://www.kegg.jp/kegg-bin/show_pathway?ko00533	3
ko05020	Prion diseases	8/779	87/25278	0.00539351	0.0768036	TRINITY_DN48969_c0_g1_i1;TRINITY_DN68699_c0_g1_i1;TRINITY_DN72538_c0_g1_i2;TRINITY_DN73594_c1_g1_i2;TRINITY_DN79352_c2_g5_i3;TRINITY_DN89942_c1_g3_i1;TRINITY_DN90238_c5_g1_i1;TRINITY_DN90238_c5_g3_i3	http://www.kegg.jp/kegg-bin/show_pathway?ko05020	8
ko00910	Nitrogen metabolism	9/779	107/25278	0.00585776	0.0802062	TRINITY_DN65778_c0_g1_i1;TRINITY_DN73821_c5_g2_i1;TRINITY_DN82552_c2_g1_i1;TRINITY_DN82552_c2_g2_i1;TRINITY_DN90452_c1_g2_i3;TRINITY_DN91622_c0_g2_i1;TRINITY_DN91622_c0_g1_i2;TRINITY_DN94515_c2_g10_i1;TRINITY_DN160181_c0_g1_i1	http://www.kegg.jp/kegg-bin/show_pathway?ko00910	9
ko00360	Phenylalanine metabolism	11/779	148/25278	0.00624854	0.0823881	TRINITY_DN65523_c0_g1_i1;TRINITY_DN71247_c1_g1_i1;TRINITY_DN74358_c9_g6_i1;TRINITY_DN89554_c1_g1_i1;TRINITY_DN90401_c1_g3_i1;TRINITY_DN90401_c1_g2_i3;TRINITY_DN90326_c0_g1_i5;TRINITY_DN90408_c0_g6_i1;TRINITY_DN92439_c6_g2_i2;TRINITY_DN95473_c1_g4_i1;TRINITY_DN212533_c0_g1_i1	http://www.kegg.jp/kegg-bin/show_pathway?ko00360	11
ko04921	Oxytocin signaling pathway	14/779	213/25278	0.00653592	0.0830355	TRINITY_DN65230_c0_g2_i1;TRINITY_DN72538_c0_g1_i2;TRINITY_DN73594_c1_g1_i2;TRINITY_DN74802_c4_g3_i1;TRINITY_DN78742_c2_g2_i1;TRINITY_DN78762_c0_g4_i13;TRINITY_DN80738_c1_g2_i1;TRINITY_DN81757_c2_g1_i6;TRINITY_DN82498_c0_g4_i1;TRINITY_DN82498_c0_g2_i4;TRINITY_DN82498_c1_g1_i6;TRINITY_DN82498_c1_g5_i1;TRINITY_DN89942_c1_g3_i1;TRINITY_DN95667_c2_g1_i7	http://www.kegg.jp/kegg-bin/show_pathway?ko04921	14
ko00053	Ascorbate and aldarate metabolism	13/779	192/25278	0.00676413	0.0830355	TRINITY_DN66170_c0_g1_i1;TRINITY_DN67350_c0_g1_i1;TRINITY_DN70600_c0_g1_i1;TRINITY_DN71355_c0_g1_i1;TRINITY_DN74580_c1_g3_i1;TRINITY_DN74830_c0_g1_i3;TRINITY_DN77314_c0_g2_i2;TRINITY_DN78525_c1_g2_i1;TRINITY_DN78525_c1_g1_i3;TRINITY_DN86753_c2_g7_i1;TRINITY_DN87313_c1_g1_i9;TRINITY_DN88949_c1_g2_i6;TRINITY_DN95935_c2_g1_i2	http://www.kegg.jp/kegg-bin/show_pathway?ko00053	13
ko00982	Drug metabolism - cytochrome P450	10/779	131/25278	0.00743394	0.0882161	TRINITY_DN72144_c3_g1_i1;TRINITY_DN81698_c0_g3_i1;TRINITY_DN88003_c3_g5_i2;TRINITY_DN88382_c0_g2_i1;TRINITY_DN89925_c1_g1_i1;TRINITY_DN91427_c7_g2_i3;TRINITY_DN93289_c0_g2_i1;TRINITY_DN94406_c2_g2_i1;TRINITY_DN94609_c0_g1_i7;TRINITY_DN114980_c0_g1_i1	http://www.kegg.jp/kegg-bin/show_pathway?ko00982	10
ko01008	Polyketide biosynthesis proteins	5/779	42/25278	0.00909237	0.104416	TRINITY_DN77590_c0_g5_i1;TRINITY_DN77590_c0_g8_i1;TRINITY_DN94747_c1_g1_i2;TRINITY_DN94747_c1_g4_i2;TRINITY_DN96704_c2_g1_i1	http://www.kegg.jp/kegg-bin/show_pathway?ko01008	5
ko05410	Hypertrophic cardiomyopathy (HCM)	8/779	100/25278	0.0121596	0.135276	TRINITY_DN74802_c4_g3_i1;TRINITY_DN78742_c2_g2_i1;TRINITY_DN81757_c2_g1_i6;TRINITY_DN82498_c0_g4_i1;TRINITY_DN82498_c0_g2_i4;TRINITY_DN82498_c1_g1_i6;TRINITY_DN82498_c1_g5_i1;TRINITY_DN95667_c2_g1_i7	http://www.kegg.jp/kegg-bin/show_pathway?ko05410	8
ko04614	Renin-angiotensin system	5/779	47/25278	0.014466	0.156058	TRINITY_DN73011_c0_g1_i10;TRINITY_DN73011_c1_g2_i4;TRINITY_DN78723_c0_g1_i7;TRINITY_DN89863_c1_g5_i2;TRINITY_DN96899_c2_g5_i1	http://www.kegg.jp/kegg-bin/show_pathway?ko04614	5
ko00480	Glutathione metabolism	16/779	288/25278	0.0174536	0.178049	TRINITY_DN72144_c3_g1_i1;TRINITY_DN72895_c3_g2_i4;TRINITY_DN73998_c2_g4_i4;TRINITY_DN81698_c0_g3_i1;TRINITY_DN86753_c2_g7_i1;TRINITY_DN88003_c3_g5_i2;TRINITY_DN88382_c0_g2_i1;TRINITY_DN89925_c1_g1_i1;TRINITY_DN90160_c3_g2_i7;TRINITY_DN90160_c3_g1_i13;TRINITY_DN91427_c7_g2_i3;TRINITY_DN94406_c2_g2_i1;TRINITY_DN94609_c0_g1_i7;TRINITY_DN94677_c4_g1_i1;TRINITY_DN95935_c2_g1_i2;TRINITY_DN114980_c0_g1_…	http://www.kegg.jp/kegg-bin/show_pathway?ko00480	16
ko05225	Hepatocellular carcinoma	13/779	217/25278	0.0175048	0.178049	TRINITY_DN72144_c3_g1_i1;TRINITY_DN72538_c0_g1_i2;TRINITY_DN73594_c1_g1_i2;TRINITY_DN80567_c0_g6_i1;TRINITY_DN81698_c0_g3_i1;TRINITY_DN88003_c3_g5_i2;TRINITY_DN88382_c0_g2_i1;TRINITY_DN89942_c1_g3_i1;TRINITY_DN89925_c1_g1_i1;TRINITY_DN91427_c7_g2_i3;TRINITY_DN94406_c2_g2_i1;TRINITY_DN94609_c0_g1_i7;TRINITY_DN114980_c0_g1_i1	http://www.kegg.jp/kegg-bin/show_pathway?ko05225	13
ko00945	Stilbenoid, diarylheptanoid and gingerol biosynthesis	4/779	35/25278	0.0219781	0.217339	TRINITY_DN71247_c1_g1_i1;TRINITY_DN90401_c1_g3_i1;TRINITY_DN90401_c1_g2_i3;TRINITY_DN92439_c6_g2_i2	http://www.kegg.jp/kegg-bin/show_pathway?ko00945	4
ko00604	Glycosphingolipid biosynthesis - ganglio series	3/779	21/25278	0.0256438	0.246735	TRINITY_DN77164_c0_g2_i1;TRINITY_DN82472_c2_g1_i1;TRINITY_DN82472_c2_g3_i2	http://www.kegg.jp/kegg-bin/show_pathway?ko00604	3
ko04380	Osteoclast differentiation	6/779	75/25278	0.0281083	0.263222	TRINITY_DN72538_c0_g1_i2;TRINITY_DN73594_c1_g1_i2;TRINITY_DN78762_c0_g4_i13;TRINITY_DN86234_c0_g1_i2;TRINITY_DN89942_c1_g3_i1;TRINITY_DN90944_c2_g3_i8	http://www.kegg.jp/kegg-bin/show_pathway?ko04380	6
ko00740	Riboflavin metabolism	4/779	38/25278	0.0288361	0.263222	TRINITY_DN86234_c0_g1_i2;TRINITY_DN86587_c2_g1_i3;TRINITY_DN90573_c1_g3_i1;TRINITY_DN90944_c2_g3_i8	http://www.kegg.jp/kegg-bin/show_pathway?ko00740	4
ko04211	Longevity regulating pathway - mammal	11/779	186/25278	0.029748	0.264757	TRINITY_DN74802_c4_g3_i1;TRINITY_DN78742_c2_g2_i1;TRINITY_DN81757_c2_g1_i6;TRINITY_DN82498_c0_g4_i1;TRINITY_DN82498_c0_g2_i4;TRINITY_DN82498_c1_g1_i6;TRINITY_DN82498_c1_g5_i1;TRINITY_DN89640_c2_g2_i2;TRINITY_DN90204_c2_g3_i5;TRINITY_DN95667_c2_g1_i7;TRINITY_DN113026_c0_g1_i1	http://www.kegg.jp/kegg-bin/show_pathway?ko04211	11
ko04371	Apelin signaling pathway	12/779	214/25278	0.0340826	0.295936	TRINITY_DN65230_c0_g2_i1;TRINITY_DN72538_c0_g1_i2;TRINITY_DN73594_c1_g1_i2;TRINITY_DN74802_c4_g3_i1;TRINITY_DN78742_c2_g2_i1;TRINITY_DN81757_c2_g1_i6;TRINITY_DN82498_c0_g4_i1;TRINITY_DN82498_c0_g2_i4;TRINITY_DN82498_c1_g1_i6;TRINITY_DN82498_c1_g5_i1;TRINITY_DN89942_c1_g3_i1;TRINITY_DN95667_c2_g1_i7	http://www.kegg.jp/kegg-bin/show_pathway?ko04371	12
ko00983	Drug metabolism - other enzymes	11/779	196/25278	0.0410643	0.348068	TRINITY_DN68994_c0_g1_i2;TRINITY_DN72144_c3_g1_i1;TRINITY_DN81698_c0_g3_i1;TRINITY_DN88003_c3_g5_i2;TRINITY_DN88382_c0_g2_i1;TRINITY_DN89925_c1_g1_i1;TRINITY_DN91427_c7_g2_i3;TRINITY_DN93805_c2_g1_i3;TRINITY_DN94406_c2_g2_i1;TRINITY_DN94609_c0_g1_i7;TRINITY_DN114980_c0_g1_i1	http://www.kegg.jp/kegg-bin/show_pathway?ko00983	11
ko04910	Insulin signaling pathway	16/779	324/25278	0.0444547	0.368043	TRINITY_DN65230_c0_g2_i1;TRINITY_DN68250_c0_g3_i1;TRINITY_DN72538_c0_g1_i2;TRINITY_DN73594_c1_g1_i2;TRINITY_DN74802_c4_g3_i1;TRINITY_DN78742_c2_g2_i1;TRINITY_DN79729_c0_g1_i1;TRINITY_DN80738_c1_g2_i1;TRINITY_DN81757_c2_g1_i6;TRINITY_DN82498_c0_g4_i1;TRINITY_DN82498_c0_g2_i4;TRINITY_DN82498_c1_g1_i6;TRINITY_DN82498_c1_g5_i1;TRINITY_DN85758_c0_g2_i2;TRINITY_DN89942_c1_g3_i1;TRINITY_DN95667_c2_g1_i7	http://www.kegg.jp/kegg-bin/show_pathway?ko04910	16
ko05200	Pathways in cancer	19/779	409/25278	0.0510185	0.410961	TRINITY_DN65230_c0_g2_i1;TRINITY_DN68699_c0_g1_i1;TRINITY_DN72144_c3_g1_i1;TRINITY_DN72538_c0_g1_i2;TRINITY_DN73594_c1_g1_i2;TRINITY_DN76437_c5_g2_i1;TRINITY_DN77139_c0_g2_i1;TRINITY_DN77139_c0_g3_i1;TRINITY_DN81698_c0_g3_i1;TRINITY_DN88003_c3_g5_i2;TRINITY_DN88013_c3_g8_i1;TRINITY_DN88382_c0_g2_i1;TRINITY_DN89942_c1_g3_i1;TRINITY_DN89925_c1_g1_i1;TRINITY_DN91427_c7_g2_i3;TRINITY_DN92298_c1_g5_i1…	http://www.kegg.jp/kegg-bin/show_pathway?ko05200	19
ko00460	Cyanoamino acid metabolism	8/779	132/25278	0.0519473	0.410961	TRINITY_DN75840_c0_g1_i1;TRINITY_DN76658_c1_g2_i3;TRINITY_DN80088_c0_g1_i5;TRINITY_DN80415_c4_g1_i1;TRINITY_DN87311_c2_g1_i1;TRINITY_DN89942_c0_g1_i1;TRINITY_DN89942_c0_g4_i1;TRINITY_DN94954_c2_g1_i17	http://www.kegg.jp/kegg-bin/show_pathway?ko00460	8
ko00531	Glycosaminoglycan degradation	3/779	29/25278	0.0588605	0.432085	TRINITY_DN68994_c0_g1_i2;TRINITY_DN76155_c1_g4_i2;TRINITY_DN76155_c1_g2_i17	http://www.kegg.jp/kegg-bin/show_pathway?ko00531	3
ko01524	Platinum drug resistance	11/779	209/25278	0.0598099	0.432085	TRINITY_DN72144_c3_g1_i1;TRINITY_DN72538_c0_g1_i2;TRINITY_DN81698_c0_g3_i1;TRINITY_DN88003_c3_g5_i2;TRINITY_DN88382_c0_g2_i1;TRINITY_DN89942_c1_g3_i1;TRINITY_DN89925_c1_g1_i1;TRINITY_DN91427_c7_g2_i3;TRINITY_DN94406_c2_g2_i1;TRINITY_DN94609_c0_g1_i7;TRINITY_DN114980_c0_g1_i1	http://www.kegg.jp/kegg-bin/show_pathway?ko01524	11
ko01002	Peptidases	34/779	834/25278	0.0605205	0.432085	TRINITY_DN67144_c0_g1_i1;TRINITY_DN67825_c0_g1_i1;TRINITY_DN67891_c0_g1_i1;TRINITY_DN71160_c3_g4_i2;TRINITY_DN71723_c2_g1_i1;TRINITY_DN72484_c0_g1_i5;TRINITY_DN72570_c0_g1_i6;TRINITY_DN73011_c0_g1_i10;TRINITY_DN73011_c1_g2_i4;TRINITY_DN73410_c0_g2_i6;TRINITY_DN75205_c1_g6_i1;TRINITY_DN78723_c0_g1_i7;TRINITY_DN84703_c6_g1_i1;TRINITY_DN84959_c0_g2_i5;TRINITY_DN85578_c1_g3_i1;TRINITY_DN89072_c0_g1_i…	http://www.kegg.jp/kegg-bin/show_pathway?ko01002	34
ko04512	ECM-receptor interaction	1/779	2/25278	0.0606861	0.432085	TRINITY_DN68699_c0_g1_i1	http://www.kegg.jp/kegg-bin/show_pathway?ko04512	1
ko00901	Indole alkaloid biosynthesis	1/779	2/25278	0.0606861	0.432085	TRINITY_DN86340_c3_g6_i1	http://www.kegg.jp/kegg-bin/show_pathway?ko00901	1
ko04114	Oocyte meiosis	13/779	265/25278	0.0679911	0.474122	TRINITY_DN65230_c0_g2_i1;TRINITY_DN72538_c0_g1_i2;TRINITY_DN73594_c1_g1_i2;TRINITY_DN76437_c5_g2_i1;TRINITY_DN77139_c0_g2_i1;TRINITY_DN77139_c0_g3_i1;TRINITY_DN78762_c0_g4_i13;TRINITY_DN79488_c1_g6_i1;TRINITY_DN80738_c1_g2_i1;TRINITY_DN88013_c3_g8_i1;TRINITY_DN89942_c1_g3_i1;TRINITY_DN90636_c0_g1_i7;TRINITY_DN94218_c4_g1_i1	http://www.kegg.jp/kegg-bin/show_pathway?ko04114	13
ko00944	Flavone and flavonol biosynthesis	3/779	31/25278	0.0692537	0.474122	TRINITY_DN47199_c0_g1_i1;TRINITY_DN68994_c0_g1_i2;TRINITY_DN78712_c1_g3_i2	http://www.kegg.jp/kegg-bin/show_pathway?ko00944	3
ko04350	TGF-beta signaling pathway	7/779	118/25278	0.0727225	0.479162	TRINITY_DN72538_c0_g1_i2;TRINITY_DN76437_c5_g2_i1;TRINITY_DN77139_c0_g2_i1;TRINITY_DN77139_c0_g3_i1;TRINITY_DN79488_c1_g6_i1;TRINITY_DN88013_c3_g8_i1;TRINITY_DN89942_c1_g3_i1	http://www.kegg.jp/kegg-bin/show_pathway?ko04350	7
ko02000	Transporters	71/779	1939/25278	0.0734428	0.479162	TRINITY_DN58320_c0_g2_i1;TRINITY_DN67293_c0_g1_i2;TRINITY_DN68107_c0_g1_i1;TRINITY_DN68988_c0_g3_i1;TRINITY_DN69842_c2_g1_i1;TRINITY_DN69901_c0_g2_i2;TRINITY_DN70146_c0_g1_i2;TRINITY_DN70640_c1_g1_i2;TRINITY_DN71157_c0_g3_i1;TRINITY_DN72144_c3_g1_i1;TRINITY_DN72714_c0_g2_i1;TRINITY_DN73249_c0_g1_i4;TRINITY_DN73556_c3_g1_i5;TRINITY_DN73742_c1_g2_i2;TRINITY_DN73821_c5_g2_i1;TRINITY_DN74169_c0_g7_i1…	http://www.kegg.jp/kegg-bin/show_pathway?ko02000	71
ko04068	FoxO signaling pathway	13/779	269/25278	0.0744858	0.479162	TRINITY_DN72538_c0_g1_i2;TRINITY_DN73594_c1_g1_i2;TRINITY_DN74802_c4_g3_i1;TRINITY_DN78742_c2_g2_i1;TRINITY_DN81757_c2_g1_i6;TRINITY_DN82498_c0_g4_i1;TRINITY_DN82498_c0_g2_i4;TRINITY_DN82498_c1_g1_i6;TRINITY_DN82498_c1_g5_i1;TRINITY_DN89942_c1_g3_i1;TRINITY_DN90204_c2_g3_i5;TRINITY_DN94218_c4_g1_i1;TRINITY_DN95667_c2_g1_i7	http://www.kegg.jp/kegg-bin/show_pathway?ko04068	13
ko04920	Adipocytokine signaling pathway	8/779	143/25278	0.0753738	0.479162	TRINITY_DN74802_c4_g3_i1;TRINITY_DN78742_c2_g2_i1;TRINITY_DN81757_c2_g1_i6;TRINITY_DN82498_c0_g4_i1;TRINITY_DN82498_c0_g2_i4;TRINITY_DN82498_c1_g1_i6;TRINITY_DN82498_c1_g5_i1;TRINITY_DN95667_c2_g1_i7	http://www.kegg.jp/kegg-bin/show_pathway?ko04920	8
ko04973	Carbohydrate digestion and absorption	3/779	33/25278	0.0804115	0.502219	TRINITY_DN42865_c0_g1_i2;TRINITY_DN82953_c1_g1_i7;TRINITY_DN94133_c0_g1_i8	http://www.kegg.jp/kegg-bin/show_pathway?ko04973	3
ko04360	Axon guidance	5/779	77/25278	0.0890424	0.537927	TRINITY_DN71607_c0_g4_i1;TRINITY_DN71607_c0_g1_i7;TRINITY_DN72538_c0_g1_i2;TRINITY_DN78762_c0_g4_i13;TRINITY_DN89942_c1_g3_i1	http://www.kegg.jp/kegg-bin/show_pathway?ko04360	5
ko04611	Platelet activation	4/779	55/25278	0.0891508	0.537927	TRINITY_DN72538_c0_g1_i2;TRINITY_DN80738_c1_g2_i1;TRINITY_DN82970_c1_g4_i4;TRINITY_DN89942_c1_g3_i1	http://www.kegg.jp/kegg-bin/show_pathway?ko04611	4
ko04810	Regulation of actin cytoskeleton	8/779	152/25278	0.0985979	0.580381	TRINITY_DN69624_c0_g1_i3;TRINITY_DN71607_c0_g4_i1;TRINITY_DN71607_c0_g1_i7;TRINITY_DN72538_c0_g1_i2;TRINITY_DN73594_c1_g1_i2;TRINITY_DN80738_c1_g2_i1;TRINITY_DN89942_c1_g3_i1;TRINITY_DN95483_c2_g1_i3	http://www.kegg.jp/kegg-bin/show_pathway?ko04810	8
ko00592	alpha-Linolenic acid metabolism	9/779	179/25278	0.10294	0.580381	TRINITY_DN58665_c0_g1_i2;TRINITY_DN77100_c0_g3_i1;TRINITY_DN77100_c0_g2_i5;TRINITY_DN79971_c0_g2_i4;TRINITY_DN82128_c1_g2_i2;TRINITY_DN88823_c0_g3_i1;TRINITY_DN89895_c2_g2_i1;TRINITY_DN89895_c2_g5_i6;TRINITY_DN91192_c0_g11_i1	http://www.kegg.jp/kegg-bin/show_pathway?ko00592	9
ko04924	Renin secretion	3/779	37/25278	0.104844	0.580381	TRINITY_DN65230_c0_g2_i1;TRINITY_DN78762_c0_g4_i13;TRINITY_DN82970_c1_g4_i4	http://www.kegg.jp/kegg-bin/show_pathway?ko04924	3
ko04310	Wnt signaling pathway	9/779	180/25278	0.105583	0.580381	TRINITY_DN76437_c5_g2_i1;TRINITY_DN77139_c0_g2_i1;TRINITY_DN77139_c0_g3_i1;TRINITY_DN78762_c0_g4_i13;TRINITY_DN79839_c1_g4_i4;TRINITY_DN81375_c4_g1_i1;TRINITY_DN83111_c2_g1_i2;TRINITY_DN85355_c0_g3_i3;TRINITY_DN88013_c3_g8_i1	http://www.kegg.jp/kegg-bin/show_pathway?ko04310	9
ko05133	Pertussis	10/779	206/25278	0.105747	0.580381	TRINITY_DN65230_c0_g2_i1;TRINITY_DN71607_c0_g4_i1;TRINITY_DN71607_c0_g1_i7;TRINITY_DN72538_c0_g1_i2;TRINITY_DN73495_c1_g2_i3;TRINITY_DN81720_c1_g2_i3;TRINITY_DN84779_c0_g2_i2;TRINITY_DN87852_c0_g8_i2;TRINITY_DN89942_c1_g3_i1;TRINITY_DN90675_c3_g3_i2	http://www.kegg.jp/kegg-bin/show_pathway?ko05133	10
ko04922	Glucagon signaling pathway	13/779	286/25278	0.106451	0.580381	TRINITY_DN65230_c0_g2_i1;TRINITY_DN71012_c0_g1_i1;TRINITY_DN74802_c4_g3_i1;TRINITY_DN78742_c2_g2_i1;TRINITY_DN78762_c0_g4_i13;TRINITY_DN80113_c2_g3_i5;TRINITY_DN81757_c2_g1_i6;TRINITY_DN82498_c0_g4_i1;TRINITY_DN82498_c0_g2_i4;TRINITY_DN82498_c1_g1_i6;TRINITY_DN82498_c1_g5_i1;TRINITY_DN85255_c1_g1_i1;TRINITY_DN95667_c2_g1_i7	http://www.kegg.jp/kegg-bin/show_pathway?ko04922	13
ko03030	DNA replication	13/779	287/25278	0.108553	0.580381	TRINITY_DN44492_c0_g1_i1;TRINITY_DN62251_c0_g1_i1;TRINITY_DN72464_c0_g1_i1;TRINITY_DN75765_c1_g9_i1;TRINITY_DN79176_c2_g2_i5;TRINITY_DN82383_c10_g1_i2;TRINITY_DN82665_c5_g3_i4;TRINITY_DN85394_c1_g3_i9;TRINITY_DN87517_c0_g1_i15;TRINITY_DN90195_c0_g3_i1;TRINITY_DN94385_c1_g5_i2;TRINITY_DN95745_c7_g1_i5;TRINITY_DN95968_c6_g11_i1	http://www.kegg.jp/kegg-bin/show_pathway?ko03030	13
ko04626	Plant-pathogen interaction	21/779	509/25278	0.109229	0.580381	TRINITY_DN50025_c0_g1_i1;TRINITY_DN65230_c0_g2_i1;TRINITY_DN66647_c0_g1_i1;TRINITY_DN73484_c2_g1_i1;TRINITY_DN73594_c1_g1_i2;TRINITY_DN74828_c0_g1_i1;TRINITY_DN75702_c2_g1_i1;TRINITY_DN77570_c2_g2_i2;TRINITY_DN78058_c1_g2_i3;TRINITY_DN79602_c0_g10_i3;TRINITY_DN80442_c2_g1_i2;TRINITY_DN81583_c1_g1_i6;TRINITY_DN81627_c2_g1_i12;TRINITY_DN84755_c2_g5_i3;TRINITY_DN86738_c2_g2_i10;TRINITY_DN88334_c0_g1…	http://www.kegg.jp/kegg-bin/show_pathway?ko04626	21
ko04550	Signaling pathways regulating pluripotency of stem cells	4/779	60/25278	0.113463	0.59401	TRINITY_DN70450_c0_g1_i1;TRINITY_DN72538_c0_g1_i2;TRINITY_DN73594_c1_g1_i2;TRINITY_DN89942_c1_g3_i1	http://www.kegg.jp/kegg-bin/show_pathway?ko04550	4
ko04962	Vasopressin-regulated water reabsorption	3/779	39/25278	0.118025	0.60049	TRINITY_DN68282_c0_g1_i1;TRINITY_DN74832_c0_g1_i2;TRINITY_DN93440_c6_g2_i1	http://www.kegg.jp/kegg-bin/show_pathway?ko04962	3
ko00603	Glycosphingolipid biosynthesis - globo and isoglobo series	4/779	61/25278	0.118643	0.60049	TRINITY_DN77164_c0_g2_i1;TRINITY_DN82472_c2_g1_i1;TRINITY_DN82472_c2_g3_i2;TRINITY_DN93786_c0_g2_i1	http://www.kegg.jp/kegg-bin/show_pathway?ko00603	4
ko05145	Toxoplasmosis	12/779	265/25278	0.119761	0.60049	TRINITY_DN68699_c0_g1_i1;TRINITY_DN72538_c0_g1_i2;TRINITY_DN73495_c1_g2_i3;TRINITY_DN74411_c1_g1_i1;TRINITY_DN77570_c2_g2_i2;TRINITY_DN79343_c0_g1_i2;TRINITY_DN80442_c2_g1_i2;TRINITY_DN81720_c1_g2_i3;TRINITY_DN84779_c0_g2_i2;TRINITY_DN87852_c0_g8_i2;TRINITY_DN89942_c1_g3_i1;TRINITY_DN90675_c3_g3_i2	http://www.kegg.jp/kegg-bin/show_pathway?ko05145	12
ko04010	MAPK signaling pathway	12/779	267/25278	0.124529	0.609303	TRINITY_DN72538_c0_g1_i2;TRINITY_DN73495_c1_g2_i3;TRINITY_DN73594_c1_g1_i2;TRINITY_DN74411_c1_g1_i1;TRINITY_DN75913_c2_g1_i8;TRINITY_DN78762_c0_g4_i13;TRINITY_DN79343_c0_g1_i2;TRINITY_DN81720_c1_g2_i3;TRINITY_DN84779_c0_g2_i2;TRINITY_DN87852_c0_g8_i2;TRINITY_DN89942_c1_g3_i1;TRINITY_DN90675_c3_g3_i2	http://www.kegg.jp/kegg-bin/show_pathway?ko04010	12
ko04270	Vascular smooth muscle contraction	5/779	86/25278	0.126347	0.609303	TRINITY_DN65230_c0_g2_i1;TRINITY_DN72538_c0_g1_i2;TRINITY_DN73594_c1_g1_i2;TRINITY_DN80738_c1_g2_i1;TRINITY_DN89942_c1_g3_i1	http://www.kegg.jp/kegg-bin/show_pathway?ko04270	5
ko04625	C-type lectin receptor signaling pathway	4/779	63/25278	0.129303	0.609303	TRINITY_DN65230_c0_g2_i1;TRINITY_DN72538_c0_g1_i2;TRINITY_DN78762_c0_g4_i13;TRINITY_DN89942_c1_g3_i1	http://www.kegg.jp/kegg-bin/show_pathway?ko04625	4
ko04142	Lysosome	7/779	137/25278	0.131259	0.609303	TRINITY_DN67891_c0_g1_i1;TRINITY_DN68994_c0_g1_i2;TRINITY_DN80415_c8_g1_i1;TRINITY_DN84959_c0_g2_i5;TRINITY_DN86234_c0_g1_i2;TRINITY_DN89099_c2_g5_i1;TRINITY_DN90944_c2_g3_i8	http://www.kegg.jp/kegg-bin/show_pathway?ko04142	7
ko03060	Protein export	7/779	137/25278	0.131259	0.609303	TRINITY_DN48969_c0_g1_i1;TRINITY_DN69882_c0_g1_i1;TRINITY_DN78080_c3_g3_i1;TRINITY_DN79352_c2_g5_i3;TRINITY_DN82972_c4_g1_i2;TRINITY_DN90238_c5_g1_i1;TRINITY_DN90238_c5_g3_i3	http://www.kegg.jp/kegg-bin/show_pathway?ko03060	7
ko00536	Glycosaminoglycan binding proteins	2/779	21/25278	0.13568	0.609303	TRINITY_DN76155_c1_g4_i2;TRINITY_DN76155_c1_g2_i17	http://www.kegg.jp/kegg-bin/show_pathway?ko00536	2
ko04720	Long-term potentiation	6/779	113/25278	0.136466	0.609303	TRINITY_DN65230_c0_g2_i1;TRINITY_DN72538_c0_g1_i2;TRINITY_DN73594_c1_g1_i2;TRINITY_DN78762_c0_g4_i13;TRINITY_DN80738_c1_g2_i1;TRINITY_DN89942_c1_g3_i1	http://www.kegg.jp/kegg-bin/show_pathway?ko04720	6
ko05219	Bladder cancer	3/779	42/25278	0.138862	0.609303	TRINITY_DN72538_c0_g1_i2;TRINITY_DN73594_c1_g1_i2;TRINITY_DN89942_c1_g3_i1	http://www.kegg.jp/kegg-bin/show_pathway?ko05219	3
ko04658	Th1 and Th2 cell differentiation	3/779	42/25278	0.138862	0.609303	TRINITY_DN72538_c0_g1_i2;TRINITY_DN78762_c0_g4_i13;TRINITY_DN89942_c1_g3_i1	http://www.kegg.jp/kegg-bin/show_pathway?ko04658	3
ko04918	Thyroid hormone synthesis	5/779	89/25278	0.140153	0.609303	TRINITY_DN48969_c0_g1_i1;TRINITY_DN79352_c2_g5_i3;TRINITY_DN90238_c5_g1_i1;TRINITY_DN90238_c5_g3_i3;TRINITY_DN92298_c1_g5_i1	http://www.kegg.jp/kegg-bin/show_pathway?ko04918	5
ko04650	Natural killer cell mediated cytotoxicity	4/779	65/25278	0.140345	0.609303	TRINITY_DN72538_c0_g1_i2;TRINITY_DN73594_c1_g1_i2;TRINITY_DN78762_c0_g4_i13;TRINITY_DN89942_c1_g3_i1	http://www.kegg.jp/kegg-bin/show_pathway?ko04650	4
ko04660	T cell receptor signaling pathway	4/779	66/25278	0.146002	0.611761	TRINITY_DN72538_c0_g1_i2;TRINITY_DN73594_c1_g1_i2;TRINITY_DN78762_c0_g4_i13;TRINITY_DN89942_c1_g3_i1	http://www.kegg.jp/kegg-bin/show_pathway?ko04660	4
ko04341	Hedgehog signaling pathway - fly	4/779	66/25278	0.146002	0.611761	TRINITY_DN76437_c5_g2_i1;TRINITY_DN77139_c0_g2_i1;TRINITY_DN77139_c0_g3_i1;TRINITY_DN88013_c3_g8_i1	http://www.kegg.jp/kegg-bin/show_pathway?ko04341	4
ko04320	Dorso-ventral axis formation	3/779	43/25278	0.146067	0.611761	TRINITY_DN72538_c0_g1_i2;TRINITY_DN73594_c1_g1_i2;TRINITY_DN89942_c1_g3_i1	http://www.kegg.jp/kegg-bin/show_pathway?ko04320	3
ko04150	mTOR signaling pathway	11/779	249/25278	0.148698	0.61554	TRINITY_DN72538_c0_g1_i2;TRINITY_DN73594_c1_g1_i2;TRINITY_DN74802_c4_g3_i1;TRINITY_DN78742_c2_g2_i1;TRINITY_DN81757_c2_g1_i6;TRINITY_DN82498_c0_g4_i1;TRINITY_DN82498_c0_g2_i4;TRINITY_DN82498_c1_g1_i6;TRINITY_DN82498_c1_g5_i1;TRINITY_DN89942_c1_g3_i1;TRINITY_DN95667_c2_g1_i7	http://www.kegg.jp/kegg-bin/show_pathway?ko04150	11
ko04730	Long-term depression	4/779	67/25278	0.151746	0.619598	TRINITY_DN72538_c0_g1_i2;TRINITY_DN73594_c1_g1_i2;TRINITY_DN79488_c1_g6_i1;TRINITY_DN89942_c1_g3_i1	http://www.kegg.jp/kegg-bin/show_pathway?ko04730	4
ko04934	Cushing's syndrome	6/779	117/25278	0.153159	0.619598	TRINITY_DN72538_c0_g1_i2;TRINITY_DN73594_c1_g1_i2;TRINITY_DN80593_c0_g6_i1;TRINITY_DN82970_c1_g4_i4;TRINITY_DN87268_c0_g3_i1;TRINITY_DN89942_c1_g3_i1	http://www.kegg.jp/kegg-bin/show_pathway?ko04934	6
ko04620	Toll-like receptor signaling pathway	8/779	170/25278	0.155631	0.622523	TRINITY_DN72538_c0_g1_i2;TRINITY_DN73495_c1_g2_i3;TRINITY_DN73594_c1_g1_i2;TRINITY_DN81720_c1_g2_i3;TRINITY_DN84779_c0_g2_i2;TRINITY_DN87852_c0_g8_i2;TRINITY_DN89942_c1_g3_i1;TRINITY_DN90675_c3_g3_i2	http://www.kegg.jp/kegg-bin/show_pathway?ko04620	8
ko04712	Circadian rhythm - plant	5/779	93/25278	0.159529	0.624155	TRINITY_DN77590_c0_g5_i1;TRINITY_DN77590_c0_g8_i1;TRINITY_DN94747_c1_g1_i2;TRINITY_DN94747_c1_g4_i2;TRINITY_DN96704_c2_g1_i1	http://www.kegg.jp/kegg-bin/show_pathway?ko04712	5
ko04725	Cholinergic synapse	3/779	45/25278	0.160827	0.624155	TRINITY_DN72538_c0_g1_i2;TRINITY_DN73594_c1_g1_i2;TRINITY_DN89942_c1_g3_i1	http://www.kegg.jp/kegg-bin/show_pathway?ko04725	3
ko05140	Leishmaniasis	7/779	145/25278	0.161298	0.624155	TRINITY_DN72538_c0_g1_i2;TRINITY_DN73495_c1_g2_i3;TRINITY_DN81720_c1_g2_i3;TRINITY_DN84779_c0_g2_i2;TRINITY_DN87852_c0_g8_i2;TRINITY_DN89942_c1_g3_i1;TRINITY_DN90675_c3_g3_i2	http://www.kegg.jp/kegg-bin/show_pathway?ko05140	7
ko00904	Diterpenoid biosynthesis	2/779	24/25278	0.168147	0.62492	TRINITY_DN71536_c0_g1_i2;TRINITY_DN71536_c0_g2_i4	http://www.kegg.jp/kegg-bin/show_pathway?ko00904	2
ko04926	Relaxin signaling pathway	3/779	46/25278	0.168371	0.62492	TRINITY_DN72538_c0_g1_i2;TRINITY_DN73594_c1_g1_i2;TRINITY_DN89942_c1_g3_i1	http://www.kegg.jp/kegg-bin/show_pathway?ko04926	3
ko04120	Ubiquitin mediated proteolysis	17/779	426/25278	0.168678	0.62492	TRINITY_DN70558_c0_g1_i2;TRINITY_DN74875_c0_g2_i3;TRINITY_DN75514_c0_g1_i1;TRINITY_DN76249_c2_g1_i6;TRINITY_DN76437_c5_g2_i1;TRINITY_DN77139_c0_g2_i1;TRINITY_DN77139_c0_g3_i1;TRINITY_DN77610_c4_g2_i1;TRINITY_DN80224_c0_g2_i1;TRINITY_DN81245_c3_g1_i5;TRINITY_DN81375_c4_g1_i1;TRINITY_DN85716_c0_g1_i22;TRINITY_DN88013_c3_g8_i1;TRINITY_DN94882_c0_g4_i1;TRINITY_DN94908_c3_g2_i2;TRINITY_DN95963_c2_g3_i…	http://www.kegg.jp/kegg-bin/show_pathway?ko04120	17
ko04510	Focal adhesion	5/779	95/25278	0.169603	0.62492	TRINITY_DN68699_c0_g1_i1;TRINITY_DN72538_c0_g1_i2;TRINITY_DN73594_c1_g1_i2;TRINITY_DN80738_c1_g2_i1;TRINITY_DN89942_c1_g3_i1	http://www.kegg.jp/kegg-bin/show_pathway?ko04510	5
ko05340	Primary immunodeficiency	1/779	6/25278	0.171246	0.62492	TRINITY_DN82970_c1_g4_i4	http://www.kegg.jp/kegg-bin/show_pathway?ko05340	1
ko04930	Type II diabetes mellitus	5/779	96/25278	0.174732	0.62492	TRINITY_DN71012_c0_g1_i1;TRINITY_DN72538_c0_g1_i2;TRINITY_DN80113_c2_g3_i5;TRINITY_DN85255_c1_g1_i1;TRINITY_DN89942_c1_g3_i1	http://www.kegg.jp/kegg-bin/show_pathway?ko04930	5
ko00062	Fatty acid elongation	4/779	71/25278	0.175539	0.62492	TRINITY_DN71639_c1_g3_i1;TRINITY_DN73033_c0_g3_i1;TRINITY_DN88085_c0_g1_i1;TRINITY_DN88085_c0_g2_i1	http://www.kegg.jp/kegg-bin/show_pathway?ko00062	4
ko04112	Cell cycle - Caulobacter	4/779	71/25278	0.175539	0.62492	TRINITY_DN89072_c0_g1_i1;TRINITY_DN92311_c0_g4_i4;TRINITY_DN94071_c3_g1_i1;TRINITY_DN95593_c5_g1_i1	http://www.kegg.jp/kegg-bin/show_pathway?ko04112	4
ko04213	Longevity regulating pathway - multiple species	11/779	260/25278	0.18119	0.627787	TRINITY_DN74411_c1_g1_i1;TRINITY_DN74802_c4_g3_i1;TRINITY_DN78742_c2_g2_i1;TRINITY_DN79343_c0_g1_i2;TRINITY_DN81757_c2_g1_i6;TRINITY_DN82498_c0_g4_i1;TRINITY_DN82498_c0_g2_i4;TRINITY_DN82498_c1_g1_i6;TRINITY_DN82498_c1_g5_i1;TRINITY_DN90204_c2_g3_i5;TRINITY_DN95667_c2_g1_i7	http://www.kegg.jp/kegg-bin/show_pathway?ko04213	11
ko04662	B cell receptor signaling pathway	4/779	72/25278	0.181677	0.627787	TRINITY_DN72538_c0_g1_i2;TRINITY_DN73594_c1_g1_i2;TRINITY_DN78762_c0_g4_i13;TRINITY_DN89942_c1_g3_i1	http://www.kegg.jp/kegg-bin/show_pathway?ko04662	4
ko04370	VEGF signaling pathway	4/779	72/25278	0.181677	0.627787	TRINITY_DN72538_c0_g1_i2;TRINITY_DN73594_c1_g1_i2;TRINITY_DN78762_c0_g4_i13;TRINITY_DN89942_c1_g3_i1	http://www.kegg.jp/kegg-bin/show_pathway?ko04370	4
ko04022	cGMP - PKG signaling pathway	6/779	124/25278	0.184387	0.627787	TRINITY_DN65230_c0_g2_i1;TRINITY_DN72538_c0_g1_i2;TRINITY_DN73594_c1_g1_i2;TRINITY_DN78762_c0_g4_i13;TRINITY_DN80738_c1_g2_i1;TRINITY_DN89942_c1_g3_i1	http://www.kegg.jp/kegg-bin/show_pathway?ko04022	6
ko04724	Glutamatergic synapse	5/779	98/25278	0.185162	0.627787	TRINITY_DN65778_c0_g1_i1;TRINITY_DN72538_c0_g1_i2;TRINITY_DN78762_c0_g4_i13;TRINITY_DN89942_c1_g3_i1;TRINITY_DN160181_c0_g1_i1	http://www.kegg.jp/kegg-bin/show_pathway?ko04724	5
ko05216	Thyroid cancer	3/779	49/25278	0.191578	0.630188	TRINITY_DN72538_c0_g1_i2;TRINITY_DN73594_c1_g1_i2;TRINITY_DN89942_c1_g3_i1	http://www.kegg.jp/kegg-bin/show_pathway?ko05216	3
ko04931	Insulin resistance	9/779	208/25278	0.194141	0.630188	TRINITY_DN74802_c4_g3_i1;TRINITY_DN78742_c2_g2_i1;TRINITY_DN80738_c1_g2_i1;TRINITY_DN81757_c2_g1_i6;TRINITY_DN82498_c0_g4_i1;TRINITY_DN82498_c0_g2_i4;TRINITY_DN82498_c1_g1_i6;TRINITY_DN82498_c1_g5_i1;TRINITY_DN95667_c2_g1_i7	http://www.kegg.jp/kegg-bin/show_pathway?ko04931	9
ko00500	Starch and sucrose metabolism	18/779	467/25278	0.196782	0.630188	TRINITY_DN42865_c0_g1_i2;TRINITY_DN75840_c0_g1_i1;TRINITY_DN76080_c1_g1_i2;TRINITY_DN76658_c1_g2_i3;TRINITY_DN76717_c5_g1_i1;TRINITY_DN78940_c0_g4_i2;TRINITY_DN80088_c0_g1_i5;TRINITY_DN80415_c4_g1_i1;TRINITY_DN82953_c1_g1_i7;TRINITY_DN84020_c3_g3_i4;TRINITY_DN88897_c1_g2_i2;TRINITY_DN89412_c1_g1_i2;TRINITY_DN89942_c0_g1_i1;TRINITY_DN89942_c0_g4_i1;TRINITY_DN91657_c1_g7_i1;TRINITY_DN94061_c3_g4_i6…	http://www.kegg.jp/kegg-bin/show_pathway?ko00500	18
ko04140	Autophagy - animal	11/779	265/25278	0.196975	0.630188	TRINITY_DN72538_c0_g1_i2;TRINITY_DN73594_c1_g1_i2;TRINITY_DN74802_c4_g3_i1;TRINITY_DN78742_c2_g2_i1;TRINITY_DN81757_c2_g1_i6;TRINITY_DN82498_c0_g4_i1;TRINITY_DN82498_c0_g2_i4;TRINITY_DN82498_c1_g1_i6;TRINITY_DN82498_c1_g5_i1;TRINITY_DN89942_c1_g3_i1;TRINITY_DN95667_c2_g1_i7	http://www.kegg.jp/kegg-bin/show_pathway?ko04140	11
ko04726	Serotonergic synapse	3/779	50/25278	0.199486	0.630188	TRINITY_DN72538_c0_g1_i2;TRINITY_DN73594_c1_g1_i2;TRINITY_DN89942_c1_g3_i1	http://www.kegg.jp/kegg-bin/show_pathway?ko04726	3
ko05226	Gastric cancer	9/779	210/25278	0.201443	0.630188	TRINITY_DN72538_c0_g1_i2;TRINITY_DN73594_c1_g1_i2;TRINITY_DN85778_c2_g7_i1;TRINITY_DN89942_c1_g3_i1;TRINITY_DN90446_c3_g2_i3;TRINITY_DN90446_c3_g4_i1;TRINITY_DN90446_c3_g1_i10;TRINITY_DN92713_c1_g5_i1;TRINITY_DN97343_c0_g1_i3	http://www.kegg.jp/kegg-bin/show_pathway?ko05226	9
ko03032	DNA replication proteins	20/779	530/25278	0.206494	0.630188	TRINITY_DN44492_c0_g1_i1;TRINITY_DN62251_c0_g1_i1;TRINITY_DN71261_c4_g2_i1;TRINITY_DN72464_c0_g1_i1;TRINITY_DN75765_c1_g9_i1;TRINITY_DN77207_c2_g1_i3;TRINITY_DN78158_c0_g7_i1;TRINITY_DN79176_c2_g2_i5;TRINITY_DN79458_c0_g1_i8;TRINITY_DN82383_c10_g1_i2;TRINITY_DN82665_c5_g3_i4;TRINITY_DN85394_c1_g3_i9;TRINITY_DN87517_c0_g1_i15;TRINITY_DN89667_c2_g1_i13;TRINITY_DN90195_c0_g3_i1;TRINITY_DN92530_c0_g2…	http://www.kegg.jp/kegg-bin/show_pathway?ko03032	20
ko04722	Neurotrophin signaling pathway	10/779	240/25278	0.208115	0.630188	TRINITY_DN65230_c0_g2_i1;TRINITY_DN72538_c0_g1_i2;TRINITY_DN73495_c1_g2_i3;TRINITY_DN73594_c1_g1_i2;TRINITY_DN74832_c0_g1_i2;TRINITY_DN81720_c1_g2_i3;TRINITY_DN84779_c0_g2_i2;TRINITY_DN87852_c0_g8_i2;TRINITY_DN89942_c1_g3_i1;TRINITY_DN90675_c3_g3_i2	http://www.kegg.jp/kegg-bin/show_pathway?ko04722	10
ko04210	Apoptosis	5/779	103/25278	0.212172	0.630188	TRINITY_DN67891_c0_g1_i1;TRINITY_DN72538_c0_g1_i2;TRINITY_DN73594_c1_g1_i2;TRINITY_DN84959_c0_g2_i5;TRINITY_DN89942_c1_g3_i1	http://www.kegg.jp/kegg-bin/show_pathway?ko04210	5
ko04151	PI3K-Akt signaling pathway	14/779	357/25278	0.214601	0.630188	TRINITY_DN68699_c0_g1_i1;TRINITY_DN72538_c0_g1_i2;TRINITY_DN73594_c1_g1_i2;TRINITY_DN74802_c4_g3_i1;TRINITY_DN78742_c2_g2_i1;TRINITY_DN79488_c1_g6_i1;TRINITY_DN81757_c2_g1_i6;TRINITY_DN82498_c0_g4_i1;TRINITY_DN82498_c0_g2_i4;TRINITY_DN82498_c1_g1_i6;TRINITY_DN82498_c1_g5_i1;TRINITY_DN89942_c1_g3_i1;TRINITY_DN92298_c1_g5_i1;TRINITY_DN95667_c2_g1_i7	http://www.kegg.jp/kegg-bin/show_pathway?ko04151	14
ko04668	TNF signaling pathway	3/779	52/25278	0.215525	0.630188	TRINITY_DN72538_c0_g1_i2;TRINITY_DN73594_c1_g1_i2;TRINITY_DN89942_c1_g3_i1	http://www.kegg.jp/kegg-bin/show_pathway?ko04668	3
ko05218	Melanoma	3/779	52/25278	0.215525	0.630188	TRINITY_DN72538_c0_g1_i2;TRINITY_DN73594_c1_g1_i2;TRINITY_DN89942_c1_g3_i1	http://www.kegg.jp/kegg-bin/show_pathway?ko05218	3
ko04713	Circadian entrainment	3/779	52/25278	0.215525	0.630188	TRINITY_DN65230_c0_g2_i1;TRINITY_DN72538_c0_g1_i2;TRINITY_DN89942_c1_g3_i1	http://www.kegg.jp/kegg-bin/show_pathway?ko04713	3
ko05223	Non-small cell lung cancer	3/779	52/25278	0.215525	0.630188	TRINITY_DN72538_c0_g1_i2;TRINITY_DN73594_c1_g1_i2;TRINITY_DN89942_c1_g3_i1	http://www.kegg.jp/kegg-bin/show_pathway?ko05223	3
ko04075	Plant hormone signal transduction	16/779	417/25278	0.218835	0.630188	TRINITY_DN37847_c0_g1_i1;TRINITY_DN69774_c0_g1_i1;TRINITY_DN70157_c0_g1_i1;TRINITY_DN70602_c0_g1_i1;TRINITY_DN70602_c0_g2_i1;TRINITY_DN71587_c0_g2_i3;TRINITY_DN74859_c0_g5_i2;TRINITY_DN76261_c0_g2_i1;TRINITY_DN76823_c0_g4_i2;TRINITY_DN79769_c0_g7_i2;TRINITY_DN81327_c0_g2_i2;TRINITY_DN81443_c1_g2_i6;TRINITY_DN83471_c0_g2_i22;TRINITY_DN91785_c1_g13_i1;TRINITY_DN93265_c2_g2_i1;TRINITY_DN95875_c3_g2_…	http://www.kegg.jp/kegg-bin/show_pathway?ko04075	16
ko04218	Cellular senescence	9/779	215/25278	0.22018	0.630188	TRINITY_DN65230_c0_g2_i1;TRINITY_DN71261_c4_g2_i1;TRINITY_DN72538_c0_g1_i2;TRINITY_DN73594_c1_g1_i2;TRINITY_DN78762_c0_g4_i13;TRINITY_DN80738_c1_g2_i1;TRINITY_DN89942_c1_g3_i1;TRINITY_DN94218_c4_g1_i1;TRINITY_DN95457_c5_g4_i1	http://www.kegg.jp/kegg-bin/show_pathway?ko04218	9
ko05033	Nicotine addiction	1/779	8/25278	0.221552	0.630188	TRINITY_DN79988_c4_g1_i2	http://www.kegg.jp/kegg-bin/show_pathway?ko05033	1
ko00281	Geraniol degradation	1/779	8/25278	0.221552	0.630188	TRINITY_DN67334_c0_g3_i3	http://www.kegg.jp/kegg-bin/show_pathway?ko00281	1
ko04016	MAPK signaling pathway - plant	11/779	273/25278	0.223433	0.630188	TRINITY_DN65230_c0_g2_i1;TRINITY_DN74828_c0_g1_i1;TRINITY_DN74859_c0_g5_i2;TRINITY_DN79769_c0_g7_i2;TRINITY_DN81443_c1_g2_i6;TRINITY_DN81583_c1_g1_i6;TRINITY_DN81627_c2_g1_i12;TRINITY_DN89398_c0_g11_i1;TRINITY_DN90204_c2_g3_i5;TRINITY_DN91785_c1_g13_i1;TRINITY_DN93265_c2_g2_i1	http://www.kegg.jp/kegg-bin/show_pathway?ko04016	11
ko05220	Chronic myeloid leukemia	3/779	53/25278	0.223644	0.630188	TRINITY_DN72538_c0_g1_i2;TRINITY_DN73594_c1_g1_i2;TRINITY_DN89942_c1_g3_i1	http://www.kegg.jp/kegg-bin/show_pathway?ko05220	3
ko00514	Other types of O-glycan biosynthesis	2/779	29/25278	0.224538	0.630188	TRINITY_DN71502_c0_g1_i1;TRINITY_DN91793_c1_g1_i7	http://www.kegg.jp/kegg-bin/show_pathway?ko00514	2
ko04624	Toll and Imd signaling pathway	7/779	160/25278	0.224814	0.630188	TRINITY_DN73495_c1_g2_i3;TRINITY_DN80224_c0_g2_i1;TRINITY_DN81720_c1_g2_i3;TRINITY_DN83760_c0_g2_i3;TRINITY_DN84779_c0_g2_i2;TRINITY_DN87852_c0_g8_i2;TRINITY_DN90675_c3_g3_i2	http://www.kegg.jp/kegg-bin/show_pathway?ko04624	7
ko05031	Amphetamine addiction	3/779	54/25278	0.231821	0.64314	TRINITY_DN65230_c0_g2_i1;TRINITY_DN78762_c0_g4_i13;TRINITY_DN80738_c1_g2_i1	http://www.kegg.jp/kegg-bin/show_pathway?ko05031	3
ko05214	Glioma	4/779	80/25278	0.233048	0.64314	TRINITY_DN65230_c0_g2_i1;TRINITY_DN72538_c0_g1_i2;TRINITY_DN73594_c1_g1_i2;TRINITY_DN89942_c1_g3_i1	http://www.kegg.jp/kegg-bin/show_pathway?ko05214	4
ko04925	Aldosterone synthesis and secretion	2/779	30/25278	0.236008	0.646299	TRINITY_DN65230_c0_g2_i1;TRINITY_DN82970_c1_g4_i4	http://www.kegg.jp/kegg-bin/show_pathway?ko04925	2
ko00550	Peptidoglycan biosynthesis	2/779	31/25278	0.247508	0.664706	TRINITY_DN54042_c0_g1_i1;TRINITY_DN95593_c5_g1_i1	http://www.kegg.jp/kegg-bin/show_pathway?ko00550	2
ko04666	Fc gamma R-mediated phagocytosis	7/779	165/25278	0.247703	0.664706	TRINITY_DN69624_c0_g1_i3;TRINITY_DN71607_c0_g4_i1;TRINITY_DN71607_c0_g1_i7;TRINITY_DN72538_c0_g1_i2;TRINITY_DN73594_c1_g1_i2;TRINITY_DN89942_c1_g3_i1;TRINITY_DN95483_c2_g1_i3	http://www.kegg.jp/kegg-bin/show_pathway?ko04666	7
ko04664	Fc epsilon RI signaling pathway	3/779	56/25278	0.248331	0.664706	TRINITY_DN72538_c0_g1_i2;TRINITY_DN73594_c1_g1_i2;TRINITY_DN89942_c1_g3_i1	http://www.kegg.jp/kegg-bin/show_pathway?ko04664	3
ko05205	Proteoglycans in cancer	6/779	139/25278	0.258382	0.686447	TRINITY_DN72538_c0_g1_i2;TRINITY_DN73594_c1_g1_i2;TRINITY_DN76155_c1_g4_i2;TRINITY_DN76155_c1_g2_i17;TRINITY_DN80738_c1_g2_i1;TRINITY_DN89942_c1_g3_i1	http://www.kegg.jp/kegg-bin/show_pathway?ko05205	6
ko04540	Gap junction	5/779	112/25278	0.263554	0.688218	TRINITY_DN72538_c0_g1_i2;TRINITY_DN73594_c1_g1_i2;TRINITY_DN84921_c1_g1_i2;TRINITY_DN89942_c1_g3_i1;TRINITY_DN97218_c1_g2_i2	http://www.kegg.jp/kegg-bin/show_pathway?ko04540	5
ko05221	Acute myeloid leukemia	3/779	58/25278	0.265011	0.688218	TRINITY_DN72538_c0_g1_i2;TRINITY_DN73594_c1_g1_i2;TRINITY_DN89942_c1_g3_i1	http://www.kegg.jp/kegg-bin/show_pathway?ko05221	3
ko05032	Morphine addiction	1/779	10/25278	0.268807	0.688218	TRINITY_DN79988_c4_g1_i2	http://www.kegg.jp/kegg-bin/show_pathway?ko05032	1
ko04960	Aldosterone-regulated sodium reabsorption	2/779	33/25278	0.27055	0.688218	TRINITY_DN72538_c0_g1_i2;TRINITY_DN89942_c1_g3_i1	http://www.kegg.jp/kegg-bin/show_pathway?ko04960	2
ko04024	cAMP signaling pathway	7/779	170/25278	0.271268	0.688218	TRINITY_DN65230_c0_g2_i1;TRINITY_DN72538_c0_g1_i2;TRINITY_DN73594_c1_g1_i2;TRINITY_DN80738_c1_g2_i1;TRINITY_DN82970_c1_g4_i4;TRINITY_DN89942_c1_g3_i1;TRINITY_DN91192_c0_g11_i1	http://www.kegg.jp/kegg-bin/show_pathway?ko04024	7
ko04917	Prolactin signaling pathway	4/779	86/25278	0.273607	0.688218	TRINITY_DN72538_c0_g1_i2;TRINITY_DN73594_c1_g1_i2;TRINITY_DN87268_c0_g3_i1;TRINITY_DN89942_c1_g3_i1	http://www.kegg.jp/kegg-bin/show_pathway?ko04917	4
ko04015	Rap1 signaling pathway	4/779	86/25278	0.273607	0.688218	TRINITY_DN65230_c0_g2_i1;TRINITY_DN72538_c0_g1_i2;TRINITY_DN73594_c1_g1_i2;TRINITY_DN89942_c1_g3_i1	http://www.kegg.jp/kegg-bin/show_pathway?ko04015	4
ko05164	Influenza A	9/779	229/25278	0.275835	0.688218	TRINITY_DN72538_c0_g1_i2;TRINITY_DN73594_c1_g1_i2;TRINITY_DN74411_c1_g1_i1;TRINITY_DN79343_c0_g1_i2;TRINITY_DN81720_c1_g2_i3;TRINITY_DN88294_c0_g4_i1;TRINITY_DN88705_c1_g2_i5;TRINITY_DN89942_c1_g3_i1;TRINITY_DN95297_c0_g3_i1	http://www.kegg.jp/kegg-bin/show_pathway?ko05164	9
ko05142	Chagas disease (American trypanosomiasis)	8/779	200/25278	0.276447	0.688218	TRINITY_DN72538_c0_g1_i2;TRINITY_DN73495_c1_g2_i3;TRINITY_DN79488_c1_g6_i1;TRINITY_DN81720_c1_g2_i3;TRINITY_DN84779_c0_g2_i2;TRINITY_DN87852_c0_g8_i2;TRINITY_DN89942_c1_g3_i1;TRINITY_DN90675_c3_g3_i2	http://www.kegg.jp/kegg-bin/show_pathway?ko05142	8
ko04961	Endocrine and other factor-regulated calcium reabsorption	3/779	60/25278	0.28182	0.696721	TRINITY_DN68282_c0_g1_i1;TRINITY_DN89099_c2_g5_i1;TRINITY_DN94142_c5_g1_i9	http://www.kegg.jp/kegg-bin/show_pathway?ko04961	3
ko04916	Melanogenesis	4/779	89/25278	0.294319	0.722604	TRINITY_DN65230_c0_g2_i1;TRINITY_DN72538_c0_g1_i2;TRINITY_DN73594_c1_g1_i2;TRINITY_DN89942_c1_g3_i1	http://www.kegg.jp/kegg-bin/show_pathway?ko04916	4
ko04530	Tight junction	9/779	237/25278	0.309309	0.749211	TRINITY_DN74802_c4_g3_i1;TRINITY_DN78742_c2_g2_i1;TRINITY_DN79488_c1_g6_i1;TRINITY_DN81757_c2_g1_i6;TRINITY_DN82498_c0_g4_i1;TRINITY_DN82498_c0_g2_i4;TRINITY_DN82498_c1_g1_i6;TRINITY_DN82498_c1_g5_i1;TRINITY_DN95667_c2_g1_i7	http://www.kegg.jp/kegg-bin/show_pathway?ko04530	9
ko04090	CD Molecules	6/779	149/25278	0.31147	0.749211	TRINITY_DN85778_c2_g7_i1;TRINITY_DN90446_c3_g2_i3;TRINITY_DN90446_c3_g4_i1;TRINITY_DN90446_c3_g1_i10;TRINITY_DN92713_c1_g5_i1;TRINITY_DN97343_c0_g1_i3	http://www.kegg.jp/kegg-bin/show_pathway?ko04090	6
ko00860	Porphyrin and chlorophyll metabolism	6/779	149/25278	0.31147	0.749211	TRINITY_DN61909_c0_g1_i1;TRINITY_DN68994_c0_g1_i2;TRINITY_DN78172_c1_g2_i1;TRINITY_DN83155_c0_g4_i1;TRINITY_DN89874_c3_g2_i3;TRINITY_DN93213_c0_g3_i8	http://www.kegg.jp/kegg-bin/show_pathway?ko00860	6
ko05165	Human papillomavirus infection	11/779	298/25278	0.313803	0.749757	TRINITY_DN68699_c0_g1_i1;TRINITY_DN71012_c0_g1_i1;TRINITY_DN72538_c0_g1_i2;TRINITY_DN73594_c1_g1_i2;TRINITY_DN78503_c0_g1_i2;TRINITY_DN79488_c1_g6_i1;TRINITY_DN80113_c2_g3_i5;TRINITY_DN85255_c1_g1_i1;TRINITY_DN88294_c0_g4_i1;TRINITY_DN88705_c1_g2_i5;TRINITY_DN89942_c1_g3_i1	http://www.kegg.jp/kegg-bin/show_pathway?ko05165	11
ko04012	ErbB signaling pathway	3/779	65/25278	0.324151	0.769318	TRINITY_DN72538_c0_g1_i2;TRINITY_DN73594_c1_g1_i2;TRINITY_DN89942_c1_g3_i1	http://www.kegg.jp/kegg-bin/show_pathway?ko04012	3
ko04927	Cortisol synthesis and secretion	2/779	38/25278	0.327881	0.773017	TRINITY_DN82970_c1_g4_i4;TRINITY_DN87268_c0_g3_i1	http://www.kegg.jp/kegg-bin/show_pathway?ko04927	2
ko00965	Betalain biosynthesis	1/779	13/25278	0.334373	0.778438	TRINITY_DN65237_c0_g1_i1	http://www.kegg.jp/kegg-bin/show_pathway?ko00965	1
ko04932	Non-alcoholic fatty liver disease (NAFLD)	9/779	243/25278	0.334984	0.778438	TRINITY_DN74802_c4_g3_i1;TRINITY_DN78742_c2_g2_i1;TRINITY_DN79715_c0_g6_i1;TRINITY_DN81757_c2_g1_i6;TRINITY_DN82498_c0_g4_i1;TRINITY_DN82498_c0_g2_i4;TRINITY_DN82498_c1_g1_i6;TRINITY_DN82498_c1_g5_i1;TRINITY_DN95667_c2_g1_i7	http://www.kegg.jp/kegg-bin/show_pathway?ko04932	9
ko04750	Inflammatory mediator regulation of TRP channels	2/779	39/25278	0.339224	0.778438	TRINITY_DN65230_c0_g2_i1;TRINITY_DN80738_c1_g2_i1	http://www.kegg.jp/kegg-bin/show_pathway?ko04750	2
ko05230	Central carbon metabolism in cancer	7/779	184/25278	0.339863	0.778438	TRINITY_DN71012_c0_g1_i1;TRINITY_DN72538_c0_g1_i2;TRINITY_DN72895_c3_g2_i4;TRINITY_DN73594_c1_g1_i2;TRINITY_DN80113_c2_g3_i5;TRINITY_DN85255_c1_g1_i1;TRINITY_DN89942_c1_g3_i1	http://www.kegg.jp/kegg-bin/show_pathway?ko05230	7
ko04062	Chemokine signaling pathway	3/779	67/25278	0.341113	0.778438	TRINITY_DN72538_c0_g1_i2;TRINITY_DN73594_c1_g1_i2;TRINITY_DN89942_c1_g3_i1	http://www.kegg.jp/kegg-bin/show_pathway?ko04062	3
ko05213	Endometrial cancer	3/779	68/25278	0.349584	0.789645	TRINITY_DN72538_c0_g1_i2;TRINITY_DN73594_c1_g1_i2;TRINITY_DN89942_c1_g3_i1	http://www.kegg.jp/kegg-bin/show_pathway?ko05213	3
ko04141	Protein processing in endoplasmic reticulum	21/779	617/25278	0.351594	0.789645	TRINITY_DN48969_c0_g1_i1;TRINITY_DN69362_c0_g1_i2;TRINITY_DN70558_c0_g1_i2;TRINITY_DN74411_c1_g1_i1;TRINITY_DN76437_c5_g2_i1;TRINITY_DN77139_c0_g2_i1;TRINITY_DN77139_c0_g3_i1;TRINITY_DN78080_c3_g3_i1;TRINITY_DN79063_c2_g2_i2;TRINITY_DN79063_c2_g4_i2;TRINITY_DN79343_c0_g1_i2;TRINITY_DN79352_c2_g5_i3;TRINITY_DN81892_c1_g7_i4;TRINITY_DN81916_c7_g2_i4;TRINITY_DN82972_c4_g1_i2;TRINITY_DN88013_c3_g8_i1…	http://www.kegg.jp/kegg-bin/show_pathway?ko04141	21
ko04261	Adrenergic signaling in cardiomyocytes	5/779	127/25278	0.353987	0.789645	TRINITY_DN65230_c0_g2_i1;TRINITY_DN72538_c0_g1_i2;TRINITY_DN79488_c1_g6_i1;TRINITY_DN80738_c1_g2_i1;TRINITY_DN89942_c1_g3_i1	http://www.kegg.jp/kegg-bin/show_pathway?ko04261	5
ko00072	Synthesis and degradation of ketone bodies	1/779	14/25278	0.354897	0.789645	TRINITY_DN67334_c0_g3_i3	http://www.kegg.jp/kegg-bin/show_pathway?ko00072	1
ko04912	GnRH signaling pathway	4/779	98/25278	0.357318	0.790095	TRINITY_DN65230_c0_g2_i1;TRINITY_DN72538_c0_g1_i2;TRINITY_DN73594_c1_g1_i2;TRINITY_DN89942_c1_g3_i1	http://www.kegg.jp/kegg-bin/show_pathway?ko04912	4
ko02042	Bacterial toxins	2/779	41/25278	0.361725	0.794901	TRINITY_DN66491_c1_g2_i4;TRINITY_DN91952_c0_g1_i4	http://www.kegg.jp/kegg-bin/show_pathway?ko02042	2
ko00194	Photosynthesis proteins	6/779	161/25278	0.377139	0.823689	TRINITY_DN58158_c0_g1_i1;TRINITY_DN72607_c3_g1_i4;TRINITY_DN78392_c1_g4_i4;TRINITY_DN83296_c4_g3_i1;TRINITY_DN95980_c3_g1_i1;TRINITY_DN96171_c2_g2_i2	http://www.kegg.jp/kegg-bin/show_pathway?ko00194	6
ko01003	Glycosyltransferases	19/779	565/25278	0.381345	0.825094	TRINITY_DN71502_c0_g1_i1;TRINITY_DN72697_c2_g2_i1;TRINITY_DN72697_c2_g5_i2;TRINITY_DN72918_c3_g1_i1;TRINITY_DN74169_c0_g7_i1;TRINITY_DN76080_c1_g1_i2;TRINITY_DN76600_c2_g2_i5;TRINITY_DN77164_c0_g2_i1;TRINITY_DN78940_c0_g4_i2;TRINITY_DN82472_c2_g1_i1;TRINITY_DN82472_c2_g3_i2;TRINITY_DN84020_c3_g3_i4;TRINITY_DN86864_c0_g1_i1;TRINITY_DN87396_c1_g3_i1;TRINITY_DN87396_c1_g2_i6;TRINITY_DN91657_c1_g7_i1…	http://www.kegg.jp/kegg-bin/show_pathway?ko01003	19
ko04516	Cell adhesion molecules and their ligands	3/779	72/25278	0.383312	0.825094	TRINITY_DN68699_c0_g1_i1;TRINITY_DN74411_c1_g1_i1;TRINITY_DN79343_c0_g1_i2	http://www.kegg.jp/kegg-bin/show_pathway?ko04516	3
ko05160	Hepatitis C	4/779	102/25278	0.385391	0.825094	TRINITY_DN72538_c0_g1_i2;TRINITY_DN79488_c1_g6_i1;TRINITY_DN89942_c1_g3_i1;TRINITY_DN94882_c0_g4_i1	http://www.kegg.jp/kegg-bin/show_pathway?ko05160	4
ko04152	AMPK signaling pathway	10/779	286/25278	0.387504	0.825094	TRINITY_DN68250_c0_g3_i1;TRINITY_DN74802_c4_g3_i1;TRINITY_DN78742_c2_g2_i1;TRINITY_DN79488_c1_g6_i1;TRINITY_DN81757_c2_g1_i6;TRINITY_DN82498_c0_g4_i1;TRINITY_DN82498_c0_g2_i4;TRINITY_DN82498_c1_g1_i6;TRINITY_DN82498_c1_g5_i1;TRINITY_DN95667_c2_g1_i7	http://www.kegg.jp/kegg-bin/show_pathway?ko04152	10
ko05162	Measles	9/779	256/25278	0.391636	0.825094	TRINITY_DN73495_c1_g2_i3;TRINITY_DN74411_c1_g1_i1;TRINITY_DN79343_c0_g1_i2;TRINITY_DN81720_c1_g2_i3;TRINITY_DN84779_c0_g2_i2;TRINITY_DN87852_c0_g8_i2;TRINITY_DN88294_c0_g4_i1;TRINITY_DN88705_c1_g2_i5;TRINITY_DN90675_c3_g3_i2	http://www.kegg.jp/kegg-bin/show_pathway?ko05162	9
ko05212	Pancreatic cancer	3/779	73/25278	0.391688	0.825094	TRINITY_DN72538_c0_g1_i2;TRINITY_DN73594_c1_g1_i2;TRINITY_DN89942_c1_g3_i1	http://www.kegg.jp/kegg-bin/show_pathway?ko05212	3
ko04979	Cholesterol metabolism	1/779	16/25278	0.394067	0.825222	TRINITY_DN80415_c8_g1_i1	http://www.kegg.jp/kegg-bin/show_pathway?ko04979	1
ko05131	Shigellosis	3/779	75/25278	0.408348	0.837961	TRINITY_DN69624_c0_g1_i3;TRINITY_DN72538_c0_g1_i2;TRINITY_DN89942_c1_g3_i1	http://www.kegg.jp/kegg-bin/show_pathway?ko05131	3
ko05224	Breast cancer	3/779	75/25278	0.408348	0.837961	TRINITY_DN72538_c0_g1_i2;TRINITY_DN73594_c1_g1_i2;TRINITY_DN89942_c1_g3_i1	http://www.kegg.jp/kegg-bin/show_pathway?ko05224	3
ko04013	MAPK signaling pathway - fly	5/779	136/25278	0.409109	0.837961	TRINITY_DN72538_c0_g1_i2;TRINITY_DN73594_c1_g1_i2;TRINITY_DN81375_c4_g1_i1;TRINITY_DN83760_c0_g2_i3;TRINITY_DN89942_c1_g3_i1	http://www.kegg.jp/kegg-bin/show_pathway?ko04013	5
ko04919	Thyroid hormone signaling pathway	6/779	168/25278	0.415681	0.837961	TRINITY_DN66491_c1_g2_i4;TRINITY_DN72538_c0_g1_i2;TRINITY_DN73594_c1_g1_i2;TRINITY_DN86143_c1_g1_i1;TRINITY_DN89942_c1_g3_i1;TRINITY_DN91952_c0_g1_i4	http://www.kegg.jp/kegg-bin/show_pathway?ko04919	6
ko00750	Vitamin B6 metabolism	2/779	46/25278	0.416589	0.837961	TRINITY_DN83038_c1_g2_i3;TRINITY_DN96389_c0_g1_i1	http://www.kegg.jp/kegg-bin/show_pathway?ko00750	2
ko04933	AGE-RAGE signaling pathway in diabetic complications	2/779	46/25278	0.416589	0.837961	TRINITY_DN72538_c0_g1_i2;TRINITY_DN89942_c1_g3_i1	http://www.kegg.jp/kegg-bin/show_pathway?ko04933	2
ko04020	Calcium signaling pathway	3/779	76/25278	0.416627	0.837961	TRINITY_DN65230_c0_g2_i1;TRINITY_DN78762_c0_g4_i13;TRINITY_DN82970_c1_g4_i4	http://www.kegg.jp/kegg-bin/show_pathway?ko04020	3
ko04064	NF-kappa B signaling pathway	5/779	139/25278	0.427379	0.854758	TRINITY_DN73495_c1_g2_i3;TRINITY_DN81720_c1_g2_i3;TRINITY_DN84779_c0_g2_i2;TRINITY_DN87852_c0_g8_i2;TRINITY_DN90675_c3_g3_i2	http://www.kegg.jp/kegg-bin/show_pathway?ko04064	5
ko05130	Pathogenic Escherichia coli infection	4/779	109/25278	0.434063	0.863277	TRINITY_DN69624_c0_g1_i3;TRINITY_DN75244_c0_g2_i3;TRINITY_DN84921_c1_g1_i2;TRINITY_DN97218_c1_g2_i2	http://www.kegg.jp/kegg-bin/show_pathway?ko05130	4
ko00400	Phenylalanine, tyrosine and tryptophan biosynthesis	5/779	141/25278	0.439498	0.869229	TRINITY_DN72971_c0_g1_i3;TRINITY_DN81835_c2_g1_i3;TRINITY_DN82036_c3_g1_i3;TRINITY_DN91749_c4_g1_i5;TRINITY_DN93483_c1_g5_i1	http://www.kegg.jp/kegg-bin/show_pathway?ko00400	5
ko00511	Other glycan degradation	2/779	49/25278	0.44835	0.880495	TRINITY_DN93236_c0_g5_i1;TRINITY_DN93236_c0_g3_i5	http://www.kegg.jp/kegg-bin/show_pathway?ko00511	2
ko00900	Terpenoid backbone biosynthesis	5/779	143/25278	0.451557	0.880495	TRINITY_DN69285_c0_g1_i1;TRINITY_DN75205_c1_g6_i1;TRINITY_DN75383_c2_g1_i1;TRINITY_DN83688_c3_g2_i2;TRINITY_DN90343_c1_g7_i1	http://www.kegg.jp/kegg-bin/show_pathway?ko00900	5
ko05206	MicroRNAs in cancer	9/779	270/25278	0.45303	0.880495	TRINITY_DN69769_c2_g1_i1;TRINITY_DN73594_c1_g1_i2;TRINITY_DN85778_c2_g7_i1;TRINITY_DN90446_c3_g2_i3;TRINITY_DN90446_c3_g4_i1;TRINITY_DN90446_c3_g1_i10;TRINITY_DN92713_c1_g5_i1;TRINITY_DN93493_c1_g2_i5;TRINITY_DN97343_c0_g1_i3	http://www.kegg.jp/kegg-bin/show_pathway?ko05206	9
ko05132	Salmonella infection	3/779	81/25278	0.457397	0.880495	TRINITY_DN69624_c0_g1_i3;TRINITY_DN72538_c0_g1_i2;TRINITY_DN89942_c1_g3_i1	http://www.kegg.jp/kegg-bin/show_pathway?ko05132	3
ko05167	Kaposi's sarcoma-associated herpesvirus infection	5/779	144/25278	0.45756	0.880495	TRINITY_DN65230_c0_g2_i1;TRINITY_DN72538_c0_g1_i2;TRINITY_DN73594_c1_g1_i2;TRINITY_DN78762_c0_g4_i13;TRINITY_DN89942_c1_g3_i1	http://www.kegg.jp/kegg-bin/show_pathway?ko05167	5
ko05034	Alcoholism	10/779	304/25278	0.46204	0.881336	TRINITY_DN65230_c0_g2_i1;TRINITY_DN68151_c0_g1_i1;TRINITY_DN72538_c0_g1_i2;TRINITY_DN73594_c1_g1_i2;TRINITY_DN75076_c0_g1_i3;TRINITY_DN80738_c1_g2_i1;TRINITY_DN82207_c2_g5_i2;TRINITY_DN84639_c1_g4_i1;TRINITY_DN89942_c1_g3_i1;TRINITY_DN90821_c0_g1_i1	http://www.kegg.jp/kegg-bin/show_pathway?ko05034	10
ko04976	Bile secretion	6/779	177/25278	0.464776	0.881336	TRINITY_DN85778_c2_g7_i1;TRINITY_DN90446_c3_g2_i3;TRINITY_DN90446_c3_g4_i1;TRINITY_DN90446_c3_g1_i10;TRINITY_DN92713_c1_g5_i1;TRINITY_DN97343_c0_g1_i3	http://www.kegg.jp/kegg-bin/show_pathway?ko04976	6
ko01502	Vancomycin resistance	1/779	20/25278	0.465424	0.881336	TRINITY_DN95593_c5_g1_i1	http://www.kegg.jp/kegg-bin/show_pathway?ko01502	1
ko04915	Estrogen signaling pathway	7/779	211/25278	0.475414	0.895489	TRINITY_DN65230_c0_g2_i1;TRINITY_DN72538_c0_g1_i2;TRINITY_DN73594_c1_g1_i2;TRINITY_DN74411_c1_g1_i1;TRINITY_DN79343_c0_g1_i2;TRINITY_DN89942_c1_g3_i1;TRINITY_DN92298_c1_g5_i1	http://www.kegg.jp/kegg-bin/show_pathway?ko04915	7
ko04970	Salivary secretion	1/779	21/25278	0.481912	0.89724	TRINITY_DN65230_c0_g2_i1	http://www.kegg.jp/kegg-bin/show_pathway?ko04970	1
ko04131	Membrane trafficking	48/779	1543/25278	0.494749	0.89724	TRINITY_DN48969_c0_g1_i1;TRINITY_DN65230_c0_g2_i1;TRINITY_DN68282_c0_g1_i1;TRINITY_DN69022_c0_g1_i1;TRINITY_DN69624_c0_g1_i3;TRINITY_DN71012_c0_g1_i1;TRINITY_DN71323_c1_g3_i5;TRINITY_DN71607_c0_g4_i1;TRINITY_DN71607_c0_g1_i7;TRINITY_DN72825_c0_g2_i1;TRINITY_DN73095_c0_g1_i1;TRINITY_DN73631_c1_g2_i1;TRINITY_DN74411_c1_g1_i1;TRINITY_DN74802_c4_g3_i1;TRINITY_DN74758_c0_g1_i1;TRINITY_DN74758_c1_g3_i2…	http://www.kegg.jp/kegg-bin/show_pathway?ko04131	48
ko04928	Parathyroid hormone synthesis, secretion and action	3/779	86/25278	0.496911	0.89724	TRINITY_DN72538_c0_g1_i2;TRINITY_DN73594_c1_g1_i2;TRINITY_DN89942_c1_g3_i1	http://www.kegg.jp/kegg-bin/show_pathway?ko04928	3
ko04659	Th17 cell differentiation	3/779	86/25278	0.496911	0.89724	TRINITY_DN72538_c0_g1_i2;TRINITY_DN78762_c0_g4_i13;TRINITY_DN89942_c1_g3_i1	http://www.kegg.jp/kegg-bin/show_pathway?ko04659	3
ko04520	Adherens junction	3/779	86/25278	0.496911	0.89724	TRINITY_DN72538_c0_g1_i2;TRINITY_DN89753_c1_g1_i6;TRINITY_DN89942_c1_g3_i1	http://www.kegg.jp/kegg-bin/show_pathway?ko04520	3
ko04744	Phototransduction	1/779	22/25278	0.497891	0.89724	TRINITY_DN65230_c0_g2_i1	http://www.kegg.jp/kegg-bin/show_pathway?ko04744	1
ko04971	Gastric acid secretion	1/779	22/25278	0.497891	0.89724	TRINITY_DN65230_c0_g2_i1	http://www.kegg.jp/kegg-bin/show_pathway?ko04971	1
ko00627	Aminobenzoate degradation	1/779	22/25278	0.497891	0.89724	TRINITY_DN74358_c9_g6_i1	http://www.kegg.jp/kegg-bin/show_pathway?ko00627	1
ko00625	Chloroalkane and chloroalkene degradation	2/779	54/25278	0.499027	0.89724	TRINITY_DN70600_c0_g1_i1;TRINITY_DN93289_c0_g2_i1	http://www.kegg.jp/kegg-bin/show_pathway?ko00625	2
ko01521	EGFR tyrosine kinase inhibitor resistance	3/779	87/25278	0.504641	0.90003	TRINITY_DN72538_c0_g1_i2;TRINITY_DN73594_c1_g1_i2;TRINITY_DN89942_c1_g3_i1	http://www.kegg.jp/kegg-bin/show_pathway?ko01521	3
ko04812	Cytoskeleton proteins	15/779	479/25278	0.511712	0.90003	TRINITY_DN67782_c0_g1_i1;TRINITY_DN69624_c0_g1_i3;TRINITY_DN71607_c0_g4_i1;TRINITY_DN71607_c0_g1_i7;TRINITY_DN74002_c2_g2_i4;TRINITY_DN82312_c1_g1_i5;TRINITY_DN84921_c1_g1_i2;TRINITY_DN86713_c0_g5_i3;TRINITY_DN90414_c0_g8_i1;TRINITY_DN93440_c6_g2_i1;TRINITY_DN94190_c2_g1_i20;TRINITY_DN94495_c1_g1_i2;TRINITY_DN94882_c0_g4_i1;TRINITY_DN95483_c2_g1_i3;TRINITY_DN97218_c1_g2_i2	http://www.kegg.jp/kegg-bin/show_pathway?ko04812	15
ko04740	Olfactory transduction	1/779	23/25278	0.513378	0.90003	TRINITY_DN65230_c0_g2_i1	http://www.kegg.jp/kegg-bin/show_pathway?ko04740	1
ko04144	Endocytosis	14/779	448/25278	0.516985	0.90003	TRINITY_DN68282_c0_g1_i1;TRINITY_DN69624_c0_g1_i3;TRINITY_DN73631_c1_g2_i1;TRINITY_DN74411_c1_g1_i1;TRINITY_DN79343_c0_g1_i2;TRINITY_DN82697_c2_g3_i1;TRINITY_DN82632_c1_g2_i2;TRINITY_DN89099_c2_g5_i1;TRINITY_DN89966_c3_g3_i1;TRINITY_DN89966_c3_g2_i2;TRINITY_DN90953_c2_g2_i3;TRINITY_DN93093_c0_g2_i3;TRINITY_DN94142_c5_g1_i9;TRINITY_DN94578_c1_g5_i1	http://www.kegg.jp/kegg-bin/show_pathway?ko04144	14
ko05211	Renal cell carcinoma	3/779	89/25278	0.519913	0.90003	TRINITY_DN72538_c0_g1_i2;TRINITY_DN73594_c1_g1_i2;TRINITY_DN89942_c1_g3_i1	http://www.kegg.jp/kegg-bin/show_pathway?ko05211	3
ko04728	Dopaminergic synapse	4/779	122/25278	0.521062	0.90003	TRINITY_DN65237_c0_g1_i1;TRINITY_DN65230_c0_g2_i1;TRINITY_DN79488_c1_g6_i1;TRINITY_DN80738_c1_g2_i1	http://www.kegg.jp/kegg-bin/show_pathway?ko04728	4
ko00520	Amino sugar and nucleotide sugar metabolism	13/779	418/25278	0.526158	0.90003	TRINITY_DN54042_c0_g1_i1;TRINITY_DN67350_c0_g1_i1;TRINITY_DN70951_c0_g1_i9;TRINITY_DN71355_c0_g1_i1;TRINITY_DN73883_c1_g1_i1;TRINITY_DN74830_c0_g1_i3;TRINITY_DN76608_c0_g7_i2;TRINITY_DN76608_c0_g9_i2;TRINITY_DN91826_c2_g1_i3;TRINITY_DN91826_c2_g4_i1;TRINITY_DN94061_c3_g4_i6;TRINITY_DN94611_c6_g4_i1;TRINITY_DN95489_c1_g1_i11	http://www.kegg.jp/kegg-bin/show_pathway?ko00520	13
ko03022	Basal transcription factors	3/779	90/25278	0.527452	0.90003	TRINITY_DN80148_c0_g1_i3;TRINITY_DN91328_c1_g1_i1;TRINITY_DN96836_c2_g2_i7	http://www.kegg.jp/kegg-bin/show_pathway?ko03022	3
ko00196	Photosynthesis - antenna proteins	1/779	24/25278	0.528388	0.90003	TRINITY_DN58158_c0_g1_i1	http://www.kegg.jp/kegg-bin/show_pathway?ko00196	1
ko04974	Protein digestion and absorption	1/779	24/25278	0.528388	0.90003	TRINITY_DN78723_c0_g1_i7	http://www.kegg.jp/kegg-bin/show_pathway?ko04974	1
ko00905	Brassinosteroid biosynthesis	1/779	24/25278	0.528388	0.90003	TRINITY_DN90264_c0_g4_i2	http://www.kegg.jp/kegg-bin/show_pathway?ko00905	1
ko03036	Chromosome and associated proteins	60/779	1958/25278	0.538459	0.911722	TRINITY_DN65230_c0_g2_i1;TRINITY_DN68151_c0_g1_i1;TRINITY_DN69769_c2_g1_i1;TRINITY_DN70135_c0_g2_i3;TRINITY_DN70698_c0_g1_i4;TRINITY_DN71390_c0_g1_i2;TRINITY_DN72538_c0_g1_i2;TRINITY_DN73097_c0_g7_i1;TRINITY_DN75076_c0_g1_i3;TRINITY_DN75242_c0_g3_i2;TRINITY_DN75244_c0_g2_i3;TRINITY_DN76437_c5_g2_i1;TRINITY_DN77139_c0_g2_i1;TRINITY_DN77139_c0_g3_i1;TRINITY_DN79195_c5_g1_i1;TRINITY_DN79195_c5_g3_i1…	http://www.kegg.jp/kegg-bin/show_pathway?ko03036	60
ko04745	Phototransduction - fly	1/779	25/25278	0.542936	0.911722	TRINITY_DN65230_c0_g2_i1	http://www.kegg.jp/kegg-bin/show_pathway?ko04745	1
ko00626	Naphthalene degradation	1/779	25/25278	0.542936	0.911722	TRINITY_DN93289_c0_g2_i1	http://www.kegg.jp/kegg-bin/show_pathway?ko00626	1
ko01011	Peptidoglycan biosynthesis and degradation proteins	2/779	59/25278	0.546619	0.913598	TRINITY_DN54042_c0_g1_i1;TRINITY_DN95593_c5_g1_i1	http://www.kegg.jp/kegg-bin/show_pathway?ko01011	2
ko05161	Hepatitis B	4/779	127/25278	0.552817	0.91964	TRINITY_DN72538_c0_g1_i2;TRINITY_DN73594_c1_g1_i2;TRINITY_DN80802_c3_g1_i1;TRINITY_DN89942_c1_g3_i1	http://www.kegg.jp/kegg-bin/show_pathway?ko05161	4
ko04214	Apoptosis - fly	3/779	94/25278	0.556936	0.922182	TRINITY_DN72538_c0_g1_i2;TRINITY_DN75896_c2_g1_i2;TRINITY_DN89942_c1_g3_i1	http://www.kegg.jp/kegg-bin/show_pathway?ko04214	3
ko00537	Glycosylphosphatidylinositol (GPI)-anchored proteins	1/779	27/25278	0.5707	0.928218	TRINITY_DN88897_c1_g2_i2	http://www.kegg.jp/kegg-bin/show_pathway?ko00537	1
ko00981	Insect hormone biosynthesis	1/779	27/25278	0.5707	0.928218	TRINITY_DN70600_c0_g1_i1	http://www.kegg.jp/kegg-bin/show_pathway?ko00981	1
ko04622	RIG-I-like receptor signaling pathway	1/779	27/25278	0.5707	0.928218	TRINITY_DN80802_c3_g1_i1	http://www.kegg.jp/kegg-bin/show_pathway?ko04622	1
ko04723	Retrograde endocannabinoid signaling	4/779	130/25278	0.571325	0.928218	TRINITY_DN72538_c0_g1_i2;TRINITY_DN79715_c0_g6_i1;TRINITY_DN79988_c4_g1_i2;TRINITY_DN89942_c1_g3_i1	http://www.kegg.jp/kegg-bin/show_pathway?ko04723	4
ko05100	Bacterial invasion of epithelial cells	2/779	62/25278	0.573618	0.928218	TRINITY_DN69624_c0_g1_i3;TRINITY_DN89099_c2_g5_i1	http://www.kegg.jp/kegg-bin/show_pathway?ko05100	2
ko03110	Chaperones and folding catalysts	22/779	732/25278	0.578849	0.932445	TRINITY_DN19531_c0_g1_i1;TRINITY_DN48969_c0_g1_i1;TRINITY_DN67623_c0_g1_i1;TRINITY_DN69362_c0_g1_i2;TRINITY_DN74411_c1_g1_i1;TRINITY_DN77749_c1_g7_i1;TRINITY_DN78080_c3_g3_i1;TRINITY_DN79063_c2_g2_i2;TRINITY_DN79063_c2_g4_i2;TRINITY_DN79343_c0_g1_i2;TRINITY_DN79352_c2_g5_i3;TRINITY_DN81011_c0_g2_i4;TRINITY_DN81892_c1_g7_i4;TRINITY_DN81916_c7_g2_i4;TRINITY_DN82972_c4_g1_i2;TRINITY_DN89800_c1_g5_i1…	http://www.kegg.jp/kegg-bin/show_pathway?ko03110	22
ko03450	Non-homologous end-joining	1/779	28/25278	0.583944	0.933601	TRINITY_DN71261_c4_g2_i1	http://www.kegg.jp/kegg-bin/show_pathway?ko03450	1
ko05168	Herpes simplex infection	7/779	234/25278	0.584812	0.933601	TRINITY_DN76437_c5_g2_i1;TRINITY_DN77139_c0_g2_i1;TRINITY_DN77139_c0_g3_i1;TRINITY_DN80738_c1_g2_i1;TRINITY_DN80976_c2_g5_i1;TRINITY_DN88013_c3_g8_i1;TRINITY_DN96836_c2_g2_i7	http://www.kegg.jp/kegg-bin/show_pathway?ko05168	7
ko00195	Photosynthesis	4/779	133/25278	0.589395	0.935315	TRINITY_DN72607_c3_g1_i4;TRINITY_DN83296_c4_g3_i1;TRINITY_DN95980_c3_g1_i1;TRINITY_DN96171_c2_g2_i2	http://www.kegg.jp/kegg-bin/show_pathway?ko00195	4
ko05166	HTLV-I infection	7/779	236/25278	0.593801	0.935315	TRINITY_DN68539_c0_g1_i1;TRINITY_DN78762_c0_g4_i13;TRINITY_DN79195_c5_g1_i1;TRINITY_DN79195_c5_g3_i1;TRINITY_DN80634_c8_g2_i3;TRINITY_DN88898_c7_g4_i1;TRINITY_DN96539_c1_g10_i1	http://www.kegg.jp/kegg-bin/show_pathway?ko05166	7
ko04091	Lectins	1/779	29/25278	0.59678	0.935315	TRINITY_DN81945_c0_g8_i2	http://www.kegg.jp/kegg-bin/show_pathway?ko04091	1
ko00600	Sphingolipid metabolism	3/779	100/25278	0.599022	0.935315	TRINITY_DN93236_c0_g5_i1;TRINITY_DN93236_c0_g3_i5;TRINITY_DN93786_c0_g2_i1	http://www.kegg.jp/kegg-bin/show_pathway?ko00600	3
ko04040	Ion channels	3/779	100/25278	0.599022	0.935315	TRINITY_DN81260_c0_g5_i1;TRINITY_DN81681_c4_g2_i2;TRINITY_DN96828_c3_g5_i1	http://www.kegg.jp/kegg-bin/show_pathway?ko04040	3
ko00350	Tyrosine metabolism	3/779	101/25278	0.605776	0.938305	TRINITY_DN65237_c0_g1_i1;TRINITY_DN90408_c0_g6_i1;TRINITY_DN93289_c0_g2_i1	http://www.kegg.jp/kegg-bin/show_pathway?ko00350	3
ko00643	Styrene degradation	1/779	30/25278	0.609221	0.938305	TRINITY_DN74358_c9_g6_i1	http://www.kegg.jp/kegg-bin/show_pathway?ko00643	1
ko00903	Limonene and pinene degradation	1/779	30/25278	0.609221	0.938305	TRINITY_DN70600_c0_g1_i1	http://www.kegg.jp/kegg-bin/show_pathway?ko00903	1
ko04111	Cell cycle - yeast	7/779	240/25278	0.61148	0.938305	TRINITY_DN76437_c5_g2_i1;TRINITY_DN77139_c0_g2_i1;TRINITY_DN77139_c0_g3_i1;TRINITY_DN79488_c1_g6_i1;TRINITY_DN88013_c3_g8_i1;TRINITY_DN89667_c2_g1_i13;TRINITY_DN90636_c0_g1_i7	http://www.kegg.jp/kegg-bin/show_pathway?ko04111	7
ko04137	Mitophagy - animal	2/779	67/25278	0.615968	0.94021	TRINITY_DN86786_c1_g1_i3;TRINITY_DN95329_c3_g2_i1	http://www.kegg.jp/kegg-bin/show_pathway?ko04137	2
ko04147	Exosome	55/779	1845/25278	0.622891	0.94021	TRINITY_DN48969_c0_g1_i1;TRINITY_DN65237_c0_g1_i1;TRINITY_DN65230_c0_g2_i1;TRINITY_DN65778_c0_g1_i1;TRINITY_DN68151_c0_g1_i1;TRINITY_DN68250_c0_g3_i1;TRINITY_DN68282_c0_g1_i1;TRINITY_DN69022_c0_g1_i1;TRINITY_DN69851_c0_g1_i4;TRINITY_DN71012_c0_g1_i1;TRINITY_DN71200_c0_g1_i3;TRINITY_DN71323_c1_g3_i5;TRINITY_DN71607_c0_g4_i1;TRINITY_DN71607_c0_g1_i7;TRINITY_DN72538_c0_g1_i2;TRINITY_DN72895_c3_g2_i4…	http://www.kegg.jp/kegg-bin/show_pathway?ko04147	55
ko05014	Amyotrophic lateral sclerosis (ALS)	2/779	68/25278	0.62404	0.94021	TRINITY_DN78762_c0_g4_i13;TRINITY_DN90204_c2_g3_i5	http://www.kegg.jp/kegg-bin/show_pathway?ko05014	2
ko05202	Transcriptional misregulation in cancers	4/779	139/25278	0.624159	0.94021	TRINITY_DN70450_c0_g1_i1;TRINITY_DN75127_c1_g1_i4;TRINITY_DN86143_c1_g1_i1;TRINITY_DN90821_c0_g1_i1	http://www.kegg.jp/kegg-bin/show_pathway?ko05202	4
ko05010	Alzheimer's disease	8/779	278/25278	0.627296	0.94021	TRINITY_DN65230_c0_g2_i1;TRINITY_DN72538_c0_g1_i2;TRINITY_DN78762_c0_g4_i13;TRINITY_DN79715_c0_g6_i1;TRINITY_DN89942_c1_g3_i1;TRINITY_DN91328_c2_g2_i2;TRINITY_DN96593_c1_g4_i1;TRINITY_DN96593_c1_g1_i11	http://www.kegg.jp/kegg-bin/show_pathway?ko05010	8
ko05323	Rheumatoid arthritis	2/779	69/25278	0.63198	0.94021	TRINITY_DN86234_c0_g1_i2;TRINITY_DN90944_c2_g3_i8	http://www.kegg.jp/kegg-bin/show_pathway?ko05323	2
ko03020	RNA polymerase	3/779	105/25278	0.632029	0.94021	TRINITY_DN63968_c0_g1_i1;TRINITY_DN66112_c0_g1_i3;TRINITY_DN86212_c2_g3_i4	http://www.kegg.jp/kegg-bin/show_pathway?ko03020	3
ko05210	Colorectal cancer	3/779	106/25278	0.6384	0.94021	TRINITY_DN72538_c0_g1_i2;TRINITY_DN73594_c1_g1_i2;TRINITY_DN89942_c1_g3_i1	http://www.kegg.jp/kegg-bin/show_pathway?ko05210	3
ko04630	Jak-STAT signaling pathway	1/779	33/25278	0.644289	0.94021	TRINITY_DN94882_c0_g4_i1	http://www.kegg.jp/kegg-bin/show_pathway?ko04630	1
ko05146	Amoebiasis	1/779	33/25278	0.644289	0.94021	TRINITY_DN68699_c0_g1_i1	http://www.kegg.jp/kegg-bin/show_pathway?ko05146	1
ko05152	Tuberculosis	10/779	352/25278	0.647407	0.94021	TRINITY_DN65230_c0_g2_i1;TRINITY_DN68539_c0_g1_i1;TRINITY_DN72538_c0_g1_i2;TRINITY_DN73495_c1_g2_i3;TRINITY_DN78762_c0_g4_i13;TRINITY_DN81720_c1_g2_i3;TRINITY_DN84779_c0_g2_i2;TRINITY_DN87852_c0_g8_i2;TRINITY_DN89942_c1_g3_i1;TRINITY_DN90675_c3_g3_i2	http://www.kegg.jp/kegg-bin/show_pathway?ko05152	10
ko01006	Prenyltransferases	2/779	71/25278	0.647466	0.94021	TRINITY_DN69285_c0_g1_i1;TRINITY_DN90343_c1_g7_i1	http://www.kegg.jp/kegg-bin/show_pathway?ko01006	2
ko00790	Folate biosynthesis	2/779	71/25278	0.647466	0.94021	TRINITY_DN69851_c0_g1_i4;TRINITY_DN90573_c1_g3_i1	http://www.kegg.jp/kegg-bin/show_pathway?ko00790	2
ko00630	Glyoxylate and dicarboxylate metabolism	7/779	249/25278	0.649695	0.94021	TRINITY_DN65778_c0_g1_i1;TRINITY_DN68757_c0_g1_i1;TRINITY_DN77283_c0_g1_i4;TRINITY_DN77283_c0_g5_i1;TRINITY_DN88208_c2_g1_i2;TRINITY_DN90204_c2_g3_i5;TRINITY_DN160181_c0_g1_i1	http://www.kegg.jp/kegg-bin/show_pathway?ko00630	7
ko03021	Transcription machinery	18/779	628/25278	0.657073	0.947036	TRINITY_DN63968_c0_g1_i1;TRINITY_DN66112_c0_g1_i3;TRINITY_DN71317_c1_g1_i3;TRINITY_DN75370_c1_g1_i2;TRINITY_DN79195_c5_g1_i1;TRINITY_DN79195_c5_g3_i1;TRINITY_DN80148_c0_g1_i3;TRINITY_DN80567_c0_g6_i1;TRINITY_DN80634_c8_g2_i3;TRINITY_DN80738_c1_g2_i1;TRINITY_DN81710_c1_g6_i1;TRINITY_DN83910_c4_g3_i5;TRINITY_DN86212_c2_g3_i4;TRINITY_DN88658_c1_g3_i5;TRINITY_DN88898_c7_g4_i1;TRINITY_DN91328_c1_g1_i1…	http://www.kegg.jp/kegg-bin/show_pathway?ko03021	18
ko00100	Steroid biosynthesis	2/779	74/25278	0.66972	0.961372	TRINITY_DN80415_c8_g1_i1;TRINITY_DN91471_c0_g2_i2	http://www.kegg.jp/kegg-bin/show_pathway?ko00100	2
ko04621	NOD-like receptor signaling pathway	4/779	148/25278	0.672677	0.961739	TRINITY_DN67623_c0_g1_i1;TRINITY_DN72538_c0_g1_i2;TRINITY_DN81720_c1_g2_i3;TRINITY_DN89942_c1_g3_i1	http://www.kegg.jp/kegg-bin/show_pathway?ko04621	4
ko04066	HIF-1 signaling pathway	5/779	185/25278	0.677797	0.965182	TRINITY_DN72538_c0_g1_i2;TRINITY_DN73594_c1_g1_i2;TRINITY_DN78072_c0_g2_i20;TRINITY_DN82993_c2_g1_i3;TRINITY_DN89942_c1_g3_i1	http://www.kegg.jp/kegg-bin/show_pathway?ko04066	5
ko04122	Sulfur relay system	1/779	37/25278	0.686206	0.973264	TRINITY_DN71529_c0_g1_i5	http://www.kegg.jp/kegg-bin/show_pathway?ko04122	1
ko04657	IL-17 signaling pathway	3/779	117/25278	0.703335	0.98086	TRINITY_DN72538_c0_g1_i2;TRINITY_DN89942_c1_g3_i1;TRINITY_DN92298_c1_g5_i1	http://www.kegg.jp/kegg-bin/show_pathway?ko04657	3
ko00130	Ubiquinone and other terpenoid-quinone biosynthesis	3/779	117/25278	0.703335	0.98086	TRINITY_DN71247_c1_g1_i1;TRINITY_DN95473_c1_g4_i1;TRINITY_DN212533_c0_g1_i1	http://www.kegg.jp/kegg-bin/show_pathway?ko00130	3
ko04972	Pancreatic secretion	1/779	39/25278	0.705276	0.98086	TRINITY_DN68282_c0_g1_i1	http://www.kegg.jp/kegg-bin/show_pathway?ko04972	1
ko04914	Progesterone-mediated oocyte maturation	4/779	155/25278	0.707303	0.98086	TRINITY_DN72538_c0_g1_i2;TRINITY_DN73594_c1_g1_i2;TRINITY_DN89942_c1_g3_i1;TRINITY_DN94218_c4_g1_i1	http://www.kegg.jp/kegg-bin/show_pathway?ko04914	4
ko05215	Prostate cancer	4/779	156/25278	0.712025	0.98086	TRINITY_DN72538_c0_g1_i2;TRINITY_DN73594_c1_g1_i2;TRINITY_DN89942_c1_g3_i1;TRINITY_DN92298_c1_g5_i1	http://www.kegg.jp/kegg-bin/show_pathway?ko05215	4
ko05222	Small cell lung cancer	1/779	40/25278	0.714373	0.98086	TRINITY_DN68699_c0_g1_i1	http://www.kegg.jp/kegg-bin/show_pathway?ko05222	1
ko00906	Carotenoid biosynthesis	2/779	81/25278	0.717217	0.98086	TRINITY_DN64333_c0_g1_i2;TRINITY_DN67401_c0_g4_i1	http://www.kegg.jp/kegg-bin/show_pathway?ko00906	2
ko00051	Fructose and mannose metabolism	5/779	194/25278	0.71726	0.98086	TRINITY_DN68250_c0_g3_i1;TRINITY_DN69497_c0_g1_i2;TRINITY_DN81512_c2_g2_i1;TRINITY_DN87368_c0_g3_i3;TRINITY_DN94061_c3_g4_i6	http://www.kegg.jp/kegg-bin/show_pathway?ko00051	5
ko04113	Meiosis - yeast	4/779	158/25278	0.721302	0.98086	TRINITY_DN79488_c1_g6_i1;TRINITY_DN80738_c1_g2_i1;TRINITY_DN89667_c2_g1_i13;TRINITY_DN90636_c0_g1_i7	http://www.kegg.jp/kegg-bin/show_pathway?ko04113	4
ko00950	Isoquinoline alkaloid biosynthesis	1/779	41/25278	0.723189	0.98086	TRINITY_DN90408_c0_g6_i1	http://www.kegg.jp/kegg-bin/show_pathway?ko00950	1
ko01504	Antimicrobial resistance genes	1/779	41/25278	0.723189	0.98086	TRINITY_DN70170_c0_g2_i1	http://www.kegg.jp/kegg-bin/show_pathway?ko01504	1
ko00310	Lysine degradation	3/779	121/25278	0.724624	0.98086	TRINITY_DN70600_c0_g1_i1;TRINITY_DN89640_c2_g2_i2;TRINITY_DN113026_c0_g1_i1	http://www.kegg.jp/kegg-bin/show_pathway?ko00310	3
ko00540	Lipopolysaccharide biosynthesis	1/779	44/25278	0.74804	0.999875	TRINITY_DN72918_c3_g1_i1	http://www.kegg.jp/kegg-bin/show_pathway?ko00540	1
ko00565	Ether lipid metabolism	2/779	88/25278	0.758836	0.999875	TRINITY_DN66491_c1_g2_i4;TRINITY_DN91952_c0_g1_i4	http://www.kegg.jp/kegg-bin/show_pathway?ko00565	2
ko04623	Cytosolic DNA-sensing pathway	1/779	46/25278	0.763357	0.999875	TRINITY_DN66112_c0_g1_i3	http://www.kegg.jp/kegg-bin/show_pathway?ko04623	1
ko04014	Ras signaling pathway	4/779	169/25278	0.768374	0.999875	TRINITY_DN65230_c0_g2_i1;TRINITY_DN72538_c0_g1_i2;TRINITY_DN73594_c1_g1_i2;TRINITY_DN89942_c1_g3_i1	http://www.kegg.jp/kegg-bin/show_pathway?ko04014	4
ko04110	Cell cycle	7/779	282/25278	0.769301	0.999875	TRINITY_DN76437_c5_g2_i1;TRINITY_DN77139_c0_g2_i1;TRINITY_DN77139_c0_g3_i1;TRINITY_DN88013_c3_g8_i1;TRINITY_DN89667_c2_g1_i13;TRINITY_DN90636_c0_g1_i7;TRINITY_DN94218_c4_g1_i1	http://www.kegg.jp/kegg-bin/show_pathway?ko04110	7
ko04330	Notch signaling pathway	1/779	47/25278	0.770663	0.999875	TRINITY_DN88462_c4_g2_i3	http://www.kegg.jp/kegg-bin/show_pathway?ko04330	1
ko00960	Tropane, piperidine and pyridine alkaloid biosynthesis	1/779	48/25278	0.777744	0.999875	TRINITY_DN90408_c0_g6_i1	http://www.kegg.jp/kegg-bin/show_pathway?ko00960	1
ko00010	Glycolysis / Gluconeogenesis	12/779	467/25278	0.778145	0.999875	TRINITY_DN68250_c0_g3_i1;TRINITY_DN70600_c0_g1_i1;TRINITY_DN71012_c0_g1_i1;TRINITY_DN77891_c0_g1_i1;TRINITY_DN77891_c1_g1_i5;TRINITY_DN78072_c0_g2_i20;TRINITY_DN80113_c2_g3_i5;TRINITY_DN82993_c2_g1_i3;TRINITY_DN85255_c1_g1_i1;TRINITY_DN91900_c4_g1_i3;TRINITY_DN93289_c0_g2_i1;TRINITY_DN93791_c4_g1_i3	http://www.kegg.jp/kegg-bin/show_pathway?ko00010	12
ko00590	Arachidonic acid metabolism	1/779	49/25278	0.784606	0.999875	TRINITY_DN85578_c1_g3_i1	http://www.kegg.jp/kegg-bin/show_pathway?ko00590	1
ko00908	Zeatin biosynthesis	1/779	49/25278	0.784606	0.999875	TRINITY_DN87701_c0_g5_i2	http://www.kegg.jp/kegg-bin/show_pathway?ko00908	1
ko04714	Thermogenesis	12/779	474/25278	0.794479	0.999875	TRINITY_DN73097_c0_g7_i1;TRINITY_DN74802_c4_g3_i1;TRINITY_DN78742_c2_g2_i1;TRINITY_DN79715_c0_g6_i1;TRINITY_DN80567_c0_g6_i1;TRINITY_DN81757_c2_g1_i6;TRINITY_DN82498_c0_g4_i1;TRINITY_DN82498_c0_g2_i4;TRINITY_DN82498_c1_g1_i6;TRINITY_DN82498_c1_g5_i1;TRINITY_DN90433_c2_g8_i1;TRINITY_DN95667_c2_g1_i7	http://www.kegg.jp/kegg-bin/show_pathway?ko04714	12
ko05322	Systemic lupus erythematosus	5/779	216/25278	0.798861	0.999875	TRINITY_DN68151_c0_g1_i1;TRINITY_DN75076_c0_g1_i3;TRINITY_DN82207_c2_g5_i2;TRINITY_DN84639_c1_g4_i1;TRINITY_DN90821_c0_g1_i1	http://www.kegg.jp/kegg-bin/show_pathway?ko05322	5
ko05203	Viral carcinogenesis	11/779	440/25278	0.799755	0.999875	TRINITY_DN71012_c0_g1_i1;TRINITY_DN72538_c0_g1_i2;TRINITY_DN75076_c0_g1_i3;TRINITY_DN80113_c2_g3_i5;TRINITY_DN80148_c0_g1_i3;TRINITY_DN80802_c3_g1_i1;TRINITY_DN82207_c2_g5_i2;TRINITY_DN84639_c1_g4_i1;TRINITY_DN85255_c1_g1_i1;TRINITY_DN89942_c1_g3_i1;TRINITY_DN95483_c2_g1_i3	http://www.kegg.jp/kegg-bin/show_pathway?ko05203	11
ko05231	Choline metabolism in cancer	4/779	179/25278	0.805553	0.999875	TRINITY_DN72538_c0_g1_i2;TRINITY_DN73594_c1_g1_i2;TRINITY_DN84205_c2_g1_i2;TRINITY_DN89942_c1_g3_i1	http://www.kegg.jp/kegg-bin/show_pathway?ko05231	4
ko04721	Synaptic vesicle cycle	3/779	139/25278	0.805873	0.999875	TRINITY_DN79988_c4_g1_i2;TRINITY_DN89099_c2_g5_i1;TRINITY_DN94142_c5_g1_i9	http://www.kegg.jp/kegg-bin/show_pathway?ko04721	3
ko00330	Arginine and proline metabolism	5/779	219/25278	0.808402	0.999875	TRINITY_DN70600_c0_g1_i1;TRINITY_DN71668_c0_g1_i1;TRINITY_DN74358_c9_g6_i1;TRINITY_DN86961_c1_g5_i1;TRINITY_DN94677_c4_g1_i1	http://www.kegg.jp/kegg-bin/show_pathway?ko00330	5
ko04146	Peroxisome	5/779	221/25278	0.814561	0.999875	TRINITY_DN67334_c0_g3_i3;TRINITY_DN77283_c0_g1_i4;TRINITY_DN77283_c0_g5_i1;TRINITY_DN90204_c2_g3_i5;TRINITY_DN91192_c0_g11_i1	http://www.kegg.jp/kegg-bin/show_pathway?ko04146	5
ko01005	Lipopolysaccharide biosynthesis proteins	1/779	54/25278	0.815871	0.999875	TRINITY_DN72918_c3_g1_i1	http://www.kegg.jp/kegg-bin/show_pathway?ko01005	1
ko05134	Legionellosis	5/779	224/25278	0.823501	0.999875	TRINITY_DN71323_c1_g3_i5;TRINITY_DN74411_c1_g1_i1;TRINITY_DN79343_c0_g1_i2;TRINITY_DN89313_c1_g4_i3;TRINITY_DN96718_c1_g1_i15	http://www.kegg.jp/kegg-bin/show_pathway?ko05134	5
ko00052	Galactose metabolism	5/779	224/25278	0.823501	0.999875	TRINITY_DN86638_c3_g6_i2;TRINITY_DN89412_c1_g1_i2;TRINITY_DN93236_c0_g5_i1;TRINITY_DN93236_c0_g3_i5;TRINITY_DN93786_c0_g2_i1	http://www.kegg.jp/kegg-bin/show_pathway?ko00052	5
ko00710	Carbon fixation in photosynthetic organisms	6/779	267/25278	0.834435	0.999875	TRINITY_DN68250_c0_g3_i1;TRINITY_DN68757_c0_g1_i1;TRINITY_DN70263_c0_g1_i2;TRINITY_DN77891_c0_g1_i1;TRINITY_DN77891_c1_g1_i5;TRINITY_DN91900_c4_g1_i3	http://www.kegg.jp/kegg-bin/show_pathway?ko00710	6
ko00562	Inositol phosphate metabolism	3/779	147/25278	0.834946	0.999875	TRINITY_DN66491_c1_g2_i4;TRINITY_DN84005_c0_g1_i6;TRINITY_DN91952_c0_g1_i4	http://www.kegg.jp/kegg-bin/show_pathway?ko00562	3
ko04031	GTP-binding proteins	3/779	148/25278	0.838304	0.999875	TRINITY_DN68282_c0_g1_i1;TRINITY_DN94031_c1_g3_i2;TRINITY_DN96718_c1_g1_i15	http://www.kegg.jp/kegg-bin/show_pathway?ko04031	3
ko04121	Ubiquitin system	33/779	1246/25278	0.839411	0.999875	TRINITY_DN66791_c1_g1_i1;TRINITY_DN67825_c0_g1_i1;TRINITY_DN69880_c2_g1_i6;TRINITY_DN70558_c0_g1_i2;TRINITY_DN71113_c0_g1_i2;TRINITY_DN71923_c0_g2_i2;TRINITY_DN72423_c0_g1_i1;TRINITY_DN72423_c1_g1_i2;TRINITY_DN72897_c0_g2_i2;TRINITY_DN74758_c1_g3_i2;TRINITY_DN74875_c0_g2_i3;TRINITY_DN75285_c0_g2_i3;TRINITY_DN75514_c0_g1_i1;TRINITY_DN76249_c2_g1_i6;TRINITY_DN76261_c0_g2_i1;TRINITY_DN76437_c5_g2_i1…	http://www.kegg.jp/kegg-bin/show_pathway?ko04121	33
ko04217	Necroptosis	5/779	230/25278	0.840335	0.999875	TRINITY_DN65778_c0_g1_i1;TRINITY_DN68151_c0_g1_i1;TRINITY_DN89966_c3_g3_i1;TRINITY_DN89966_c3_g2_i2;TRINITY_DN160181_c0_g1_i1	http://www.kegg.jp/kegg-bin/show_pathway?ko04217	5
ko00220	Arginine biosynthesis	2/779	107/25278	0.846031	0.999875	TRINITY_DN65778_c0_g1_i1;TRINITY_DN160181_c0_g1_i1	http://www.kegg.jp/kegg-bin/show_pathway?ko00220	2
ko03018	RNA degradation	7/779	314/25278	0.853836	0.999875	TRINITY_DN71256_c4_g1_i1;TRINITY_DN78072_c0_g2_i20;TRINITY_DN78735_c0_g6_i4;TRINITY_DN81710_c1_g6_i1;TRINITY_DN82993_c2_g1_i3;TRINITY_DN90020_c3_g1_i4;TRINITY_DN94867_c0_g8_i1	http://www.kegg.jp/kegg-bin/show_pathway?ko03018	7
ko04115	p53 signaling pathway	2/779	110/25278	0.856836	0.999875	TRINITY_DN81375_c4_g1_i1;TRINITY_DN94218_c4_g1_i1	http://www.kegg.jp/kegg-bin/show_pathway?ko04115	2
ko02022	Two-component system	1/779	63/25278	0.861169	0.999875	TRINITY_DN76670_c3_g4_i3	http://www.kegg.jp/kegg-bin/show_pathway?ko02022	1
ko04130	SNARE interactions in vesicular transport	1/779	64/25278	0.865458	0.999875	TRINITY_DN69022_c0_g1_i1	http://www.kegg.jp/kegg-bin/show_pathway?ko04130	1
ko04011	MAPK signaling pathway - yeast	3/779	157/25278	0.865949	0.999875	TRINITY_DN72538_c0_g1_i2;TRINITY_DN89942_c1_g3_i1;TRINITY_DN90204_c2_g3_i5	http://www.kegg.jp/kegg-bin/show_pathway?ko04011	3
ko04072	Phospholipase D signaling pathway	3/779	158/25278	0.868748	0.999875	TRINITY_DN72538_c0_g1_i2;TRINITY_DN73594_c1_g1_i2;TRINITY_DN89942_c1_g3_i1	http://www.kegg.jp/kegg-bin/show_pathway?ko04072	3
ko01040	Biosynthesis of unsaturated fatty acids	2/779	114/25278	0.870166	0.999875	TRINITY_DN71639_c1_g3_i1;TRINITY_DN91192_c0_g11_i1	http://www.kegg.jp/kegg-bin/show_pathway?ko01040	2
ko00340	Histidine metabolism	1/779	66/25278	0.873643	0.999875	TRINITY_DN70600_c0_g1_i1	http://www.kegg.jp/kegg-bin/show_pathway?ko00340	1
ko02010	ABC transporters	7/779	324/25278	0.874437	0.999875	TRINITY_DN84140_c0_g5_i1;TRINITY_DN85778_c2_g7_i1;TRINITY_DN90446_c3_g2_i3;TRINITY_DN90446_c3_g4_i1;TRINITY_DN90446_c3_g1_i10;TRINITY_DN92713_c1_g5_i1;TRINITY_DN97343_c0_g1_i3	http://www.kegg.jp/kegg-bin/show_pathway?ko02010	7
ko04390	Hippo signaling pathway	2/779	117/25278	0.879404	0.999875	TRINITY_DN79488_c1_g6_i1;TRINITY_DN80738_c1_g2_i1	http://www.kegg.jp/kegg-bin/show_pathway?ko04390	2
ko03410	Base excision repair	2/779	119/25278	0.885221	0.999875	TRINITY_DN71907_c0_g1_i1;TRINITY_DN79197_c11_g1_i3	http://www.kegg.jp/kegg-bin/show_pathway?ko03410	2
ko04071	Sphingolipid signaling pathway	4/779	208/25278	0.886627	0.999875	TRINITY_DN72538_c0_g1_i2;TRINITY_DN73594_c1_g1_i2;TRINITY_DN79488_c1_g6_i1;TRINITY_DN89942_c1_g3_i1	http://www.kegg.jp/kegg-bin/show_pathway?ko04071	4
ko00920	Sulfur metabolism	1/779	71/25278	0.891996	0.999875	TRINITY_DN86666_c2_g5_i1	http://www.kegg.jp/kegg-bin/show_pathway?ko00920	1
ko03440	Homologous recombination	3/779	169/25278	0.896292	0.999875	TRINITY_DN71261_c4_g2_i1;TRINITY_DN84723_c0_g4_i1;TRINITY_DN87517_c0_g1_i15	http://www.kegg.jp/kegg-bin/show_pathway?ko03440	3
ko00071	Fatty acid degradation	3/779	170/25278	0.898519	0.999875	TRINITY_DN70600_c0_g1_i1;TRINITY_DN91192_c0_g11_i1;TRINITY_DN93289_c0_g2_i1	http://www.kegg.jp/kegg-bin/show_pathway?ko00071	3
ko00760	Nicotinate and nicotinamide metabolism	1/779	73/25278	0.898568	0.999875	TRINITY_DN95781_c1_g4_i3	http://www.kegg.jp/kegg-bin/show_pathway?ko00760	1
ko00680	Methane metabolism	4/779	221/25278	0.912186	0.999875	TRINITY_DN68250_c0_g3_i1;TRINITY_DN78072_c0_g2_i20;TRINITY_DN82993_c2_g1_i3;TRINITY_DN93791_c4_g1_i3	http://www.kegg.jp/kegg-bin/show_pathway?ko00680	4
ko00230	Purine metabolism	12/779	549/25278	0.918074	0.999875	TRINITY_DN63968_c0_g1_i1;TRINITY_DN66112_c0_g1_i3;TRINITY_DN71012_c0_g1_i1;TRINITY_DN72908_c0_g1_i9;TRINITY_DN74311_c0_g3_i13;TRINITY_DN80113_c2_g3_i5;TRINITY_DN84703_c6_g1_i1;TRINITY_DN85255_c1_g1_i1;TRINITY_DN86212_c2_g3_i4;TRINITY_DN86392_c1_g2_i1;TRINITY_DN86587_c2_g1_i3;TRINITY_DN95781_c1_g4_i3	http://www.kegg.jp/kegg-bin/show_pathway?ko00230	12
ko04070	Phosphatidylinositol signaling system	2/779	134/25278	0.921215	0.999875	TRINITY_DN65230_c0_g2_i1;TRINITY_DN84005_c0_g1_i6	http://www.kegg.jp/kegg-bin/show_pathway?ko04070	2
ko00620	Pyruvate metabolism	8/779	395/25278	0.922645	0.999875	TRINITY_DN69155_c0_g1_i1;TRINITY_DN70600_c0_g1_i1;TRINITY_DN71012_c0_g1_i1;TRINITY_DN77891_c0_g1_i1;TRINITY_DN77891_c1_g1_i5;TRINITY_DN80113_c2_g3_i5;TRINITY_DN85255_c1_g1_i1;TRINITY_DN91900_c4_g1_i3	http://www.kegg.jp/kegg-bin/show_pathway?ko00620	8
ko00260	Glycine, serine and threonine metabolism	4/779	229/25278	0.925239	0.999875	TRINITY_DN83038_c1_g2_i3;TRINITY_DN90408_c0_g6_i1;TRINITY_DN93791_c4_g1_i3;TRINITY_DN96389_c0_g1_i1	http://www.kegg.jp/kegg-bin/show_pathway?ko00260	4
ko01522	Endocrine resistance	47/779	1839/25278	0.926088	0.999875	TRINITY_DN48212_c0_g1_i1;TRINITY_DN65128_c0_g1_i3;TRINITY_DN67876_c0_g1_i2;TRINITY_DN70028_c0_g1_i11;TRINITY_DN70956_c1_g1_i4;TRINITY_DN71268_c1_g1_i4;TRINITY_DN71631_c0_g3_i5;TRINITY_DN72075_c0_g2_i3;TRINITY_DN72538_c0_g1_i2;TRINITY_DN73481_c7_g1_i1;TRINITY_DN73594_c1_g1_i2;TRINITY_DN73693_c0_g3_i2;TRINITY_DN73781_c4_g8_i1;TRINITY_DN73973_c3_g4_i1;TRINITY_DN77362_c2_g1_i1;TRINITY_DN80241_c2_g4_i…	http://www.kegg.jp/kegg-bin/show_pathway?ko01522	47
ko03040	Spliceosome	12/779	572/25278	0.940262	0.999875	TRINITY_DN63512_c0_g1_i1;TRINITY_DN71256_c4_g1_i1;TRINITY_DN72656_c0_g1_i14;TRINITY_DN74411_c1_g1_i1;TRINITY_DN76428_c0_g1_i1;TRINITY_DN77451_c0_g4_i1;TRINITY_DN79343_c0_g1_i2;TRINITY_DN80113_c0_g1_i1;TRINITY_DN80976_c2_g5_i1;TRINITY_DN81053_c0_g1_i1;TRINITY_DN91082_c6_g1_i1;TRINITY_DN92912_c1_g4_i1	http://www.kegg.jp/kegg-bin/show_pathway?ko03040	12
ko00730	Thiamine metabolism	1/779	91/25278	0.942367	0.999875	TRINITY_DN86392_c1_g2_i1	http://www.kegg.jp/kegg-bin/show_pathway?ko00730	1
ko05016	Huntington's disease	6/779	330/25278	0.942982	0.999875	TRINITY_DN66112_c0_g1_i3;TRINITY_DN79715_c0_g6_i1;TRINITY_DN86143_c1_g1_i1;TRINITY_DN89099_c2_g5_i1;TRINITY_DN94142_c5_g1_i9;TRINITY_DN96836_c2_g2_i7	http://www.kegg.jp/kegg-bin/show_pathway?ko05016	6
ko00030	Pentose phosphate pathway	3/779	196/25278	0.943169	0.999875	TRINITY_DN68250_c0_g3_i1;TRINITY_DN72895_c3_g2_i4;TRINITY_DN73998_c2_g4_i4	http://www.kegg.jp/kegg-bin/show_pathway?ko00030	3
ko04391	Hippo signaling pathway -fly	1/779	92/25278	0.944149	0.999875	TRINITY_DN79488_c1_g6_i1	http://www.kegg.jp/kegg-bin/show_pathway?ko04391	1
ko04612	Antigen processing and presentation	3/779	197/25278	0.944453	0.999875	TRINITY_DN68539_c0_g1_i1;TRINITY_DN74411_c1_g1_i1;TRINITY_DN79343_c0_g1_i2	http://www.kegg.jp/kegg-bin/show_pathway?ko04612	3
ko04216	Ferroptosis	1/779	98/25278	0.953746	0.999875	TRINITY_DN90704_c2_g1_i6	http://www.kegg.jp/kegg-bin/show_pathway?ko04216	1
ko04139	Mitophagy - yeast	1/779	99/25278	0.955177	0.999875	TRINITY_DN86143_c1_g1_i1	http://www.kegg.jp/kegg-bin/show_pathway?ko04139	1
ko00280	Valine, leucine and isoleucine degradation	2/779	166/25278	0.965633	0.999875	TRINITY_DN67334_c0_g3_i3;TRINITY_DN70600_c0_g1_i1	http://www.kegg.jp/kegg-bin/show_pathway?ko00280	2
ko00450	Selenocompound metabolism	1/779	108/25278	0.966221	0.999875	TRINITY_DN85477_c1_g2_i1	http://www.kegg.jp/kegg-bin/show_pathway?ko00450	1
ko02020	Two-component system	3/779	219/25278	0.966699	0.999875	TRINITY_DN65778_c0_g1_i1;TRINITY_DN76670_c3_g4_i3;TRINITY_DN160181_c0_g1_i1	http://www.kegg.jp/kegg-bin/show_pathway?ko02020	3
ko00020	Citrate cycle (TCA cycle)	3/779	220/25278	0.967477	0.999875	TRINITY_DN77891_c0_g1_i1;TRINITY_DN77891_c1_g1_i5;TRINITY_DN91900_c4_g1_i3	http://www.kegg.jp/kegg-bin/show_pathway?ko00020	3
ko00561	Glycerolipid metabolism	3/779	220/25278	0.967477	0.999875	TRINITY_DN70600_c0_g1_i1;TRINITY_DN93786_c0_g2_i1;TRINITY_DN94322_c5_g1_i1	http://www.kegg.jp/kegg-bin/show_pathway?ko00561	3
ko03460	Fanconi anemia pathway	1/779	111/25278	0.969262	0.999875	TRINITY_DN87517_c0_g1_i15	http://www.kegg.jp/kegg-bin/show_pathway?ko03460	1
ko00770	Pantothenate and CoA biosynthesis	1/779	111/25278	0.969262	0.999875	TRINITY_DN93805_c2_g1_i3	http://www.kegg.jp/kegg-bin/show_pathway?ko00770	1
ko03430	Mismatch repair	2/779	174/25278	0.972201	0.999875	TRINITY_DN69615_c0_g1_i4;TRINITY_DN87517_c0_g1_i15	http://www.kegg.jp/kegg-bin/show_pathway?ko03430	2
ko00564	Glycerophospholipid metabolism	4/779	279/25278	0.974123	0.999875	TRINITY_DN66491_c1_g2_i4;TRINITY_DN90771_c0_g1_i1;TRINITY_DN91952_c0_g1_i4;TRINITY_DN94322_c5_g1_i1	http://www.kegg.jp/kegg-bin/show_pathway?ko00564	4
ko03010	Ribosome	16/779	802/25278	0.977994	0.999875	TRINITY_DN12359_c0_g1_i1;TRINITY_DN55430_c0_g1_i2;TRINITY_DN67431_c0_g3_i1;TRINITY_DN69121_c0_g1_i1;TRINITY_DN81411_c0_g5_i1;TRINITY_DN82289_c2_g1_i6;TRINITY_DN84901_c3_g3_i1;TRINITY_DN85418_c1_g1_i10;TRINITY_DN88861_c1_g2_i1;TRINITY_DN89733_c0_g6_i3;TRINITY_DN90274_c1_g2_i1;TRINITY_DN90274_c1_g8_i1;TRINITY_DN91595_c5_g3_i1;TRINITY_DN93869_c1_g8_i1;TRINITY_DN95838_c1_g2_i1;TRINITY_DN95980_c4_g1_i8	http://www.kegg.jp/kegg-bin/show_pathway?ko03010	16
ko02044	Secretion system	2/779	184/25278	0.978723	0.999875	TRINITY_DN78080_c3_g3_i1;TRINITY_DN82972_c4_g1_i2	http://www.kegg.jp/kegg-bin/show_pathway?ko02044	2
ko04212	Longevity regulating pathway - worm	2/779	185/25278	0.979287	0.999875	TRINITY_DN90204_c2_g3_i5;TRINITY_DN94071_c3_g1_i1	http://www.kegg.jp/kegg-bin/show_pathway?ko04212	2
ko00270	Cysteine and methionine metabolism	5/779	338/25278	0.979747	0.999875	TRINITY_DN71200_c0_g1_i3;TRINITY_DN76129_c4_g2_i1;TRINITY_DN86666_c2_g5_i1;TRINITY_DN86711_c0_g1_i2;TRINITY_DN94677_c4_g1_i1	http://www.kegg.jp/kegg-bin/show_pathway?ko00270	5
ko03400	DNA repair and recombination proteins	18/779	904/25278	0.983818	0.999875	TRINITY_DN63968_c0_g1_i1;TRINITY_DN66112_c0_g1_i3;TRINITY_DN69615_c0_g1_i4;TRINITY_DN71261_c4_g2_i1;TRINITY_DN71907_c0_g1_i1;TRINITY_DN74875_c0_g2_i3;TRINITY_DN79197_c11_g1_i3;TRINITY_DN80148_c0_g1_i3;TRINITY_DN80224_c0_g2_i1;TRINITY_DN84723_c0_g4_i1;TRINITY_DN86212_c2_g3_i4;TRINITY_DN86986_c0_g1_i1;TRINITY_DN87517_c0_g1_i15;TRINITY_DN89213_c1_g3_i1;TRINITY_DN89469_c0_g2_i5;TRINITY_DN91688_c1_g5_…	http://www.kegg.jp/kegg-bin/show_pathway?ko03400	18
ko03011	Ribosome	16/779	824/25278	0.983986	0.999875	TRINITY_DN12359_c0_g1_i1;TRINITY_DN55430_c0_g1_i2;TRINITY_DN67431_c0_g3_i1;TRINITY_DN69121_c0_g1_i1;TRINITY_DN81411_c0_g5_i1;TRINITY_DN82289_c2_g1_i6;TRINITY_DN84901_c3_g3_i1;TRINITY_DN85418_c1_g1_i10;TRINITY_DN88861_c1_g2_i1;TRINITY_DN89733_c0_g6_i3;TRINITY_DN90274_c1_g2_i1;TRINITY_DN90274_c1_g8_i1;TRINITY_DN91595_c5_g3_i1;TRINITY_DN93869_c1_g8_i1;TRINITY_DN95838_c1_g2_i1;TRINITY_DN95980_c4_g1_i8	http://www.kegg.jp/kegg-bin/show_pathway?ko03011	16
ko00061	Fatty acid biosynthesis	1/779	134/25278	0.98509	0.999875	TRINITY_DN72083_c0_g1_i4	http://www.kegg.jp/kegg-bin/show_pathway?ko00061	1
ko01004	Lipid biosynthesis proteins	3/779	254/25278	0.985693	0.999875	TRINITY_DN71639_c1_g3_i1;TRINITY_DN72083_c0_g1_i4;TRINITY_DN94322_c5_g1_i1	http://www.kegg.jp/kegg-bin/show_pathway?ko01004	3
ko03013	RNA transport	7/779	455/25278	0.987591	0.999875	TRINITY_DN71323_c1_g3_i5;TRINITY_DN77451_c0_g4_i1;TRINITY_DN80086_c0_g1_i1;TRINITY_DN88985_c2_g4_i3;TRINITY_DN93148_c3_g8_i2;TRINITY_DN95297_c0_g3_i1;TRINITY_DN95909_c3_g3_i1	http://www.kegg.jp/kegg-bin/show_pathway?ko03013	7
ko03009	Ribosome biogenesis	15/779	820/25278	0.990897	0.999875	TRINITY_DN71557_c0_g1_i11;TRINITY_DN73537_c1_g3_i1;TRINITY_DN74411_c1_g1_i1;TRINITY_DN75242_c0_g3_i2;TRINITY_DN75244_c0_g2_i3;TRINITY_DN78669_c5_g1_i4;TRINITY_DN79343_c0_g1_i2;TRINITY_DN81710_c1_g6_i1;TRINITY_DN81997_c0_g1_i1;TRINITY_DN82350_c1_g1_i1;TRINITY_DN82890_c2_g4_i1;TRINITY_DN86155_c0_g4_i2;TRINITY_DN92853_c1_g2_i2;TRINITY_DN94684_c1_g1_i3;TRINITY_DN95492_c1_g2_i6	http://www.kegg.jp/kegg-bin/show_pathway?ko03009	15
ko04145	Phagosome	2/779	220/25278	0.992015	0.999875	TRINITY_DN84921_c1_g1_i2;TRINITY_DN97218_c1_g2_i2	http://www.kegg.jp/kegg-bin/show_pathway?ko04145	2
ko03420	Nucleotide excision repair	2/779	225/25278	0.993045	0.999875	TRINITY_DN80148_c0_g1_i3;TRINITY_DN87517_c0_g1_i15	http://www.kegg.jp/kegg-bin/show_pathway?ko03420	2
ko03019	Messenger RNA Biogenesis	22/779	1133/25278	0.993807	0.999875	TRINITY_DN70135_c0_g2_i3;TRINITY_DN71239_c1_g1_i7;TRINITY_DN71256_c4_g1_i1;TRINITY_DN71323_c1_g3_i5;TRINITY_DN76428_c0_g1_i1;TRINITY_DN77451_c0_g4_i1;TRINITY_DN78072_c0_g2_i20;TRINITY_DN78735_c0_g6_i4;TRINITY_DN80738_c1_g2_i1;TRINITY_DN80802_c3_g1_i1;TRINITY_DN81280_c0_g1_i1;TRINITY_DN81710_c1_g6_i1;TRINITY_DN82993_c2_g1_i3;TRINITY_DN88985_c2_g4_i3;TRINITY_DN90020_c3_g1_i4;TRINITY_DN90389_c0_g2_i…	http://www.kegg.jp/kegg-bin/show_pathway?ko03019	22
ko03008	Ribosome biogenesis in eukaryotes	2/779	231/25278	0.99411	0.999875	TRINITY_DN81710_c1_g6_i1;TRINITY_DN95492_c1_g2_i6	http://www.kegg.jp/kegg-bin/show_pathway?ko03008	2
ko01009	Protein phosphatase and associated proteins	11/779	675/25278	0.994161	0.999875	TRINITY_DN65230_c0_g2_i1;TRINITY_DN71200_c0_g1_i3;TRINITY_DN71557_c0_g1_i11;TRINITY_DN73242_c7_g1_i9;TRINITY_DN74411_c1_g1_i1;TRINITY_DN75913_c2_g1_i8;TRINITY_DN78762_c0_g4_i13;TRINITY_DN79343_c0_g1_i2;TRINITY_DN79488_c1_g6_i1;TRINITY_DN80738_c1_g2_i1;TRINITY_DN81260_c0_g5_i1	http://www.kegg.jp/kegg-bin/show_pathway?ko01009	11
ko05012	Parkinson's disease	2/779	237/25278	0.995014	0.999875	TRINITY_DN79715_c0_g6_i1;TRINITY_DN94908_c3_g2_i2	http://www.kegg.jp/kegg-bin/show_pathway?ko05012	2
ko03320	PPAR signaling pathway	1/779	182/25278	0.996713	0.999875	TRINITY_DN91192_c0_g11_i1	http://www.kegg.jp/kegg-bin/show_pathway?ko03320	1
ko03041	Spliceosome	18/779	1011/25278	0.99675	0.999875	TRINITY_DN46386_c0_g1_i1;TRINITY_DN63512_c0_g1_i1;TRINITY_DN71256_c4_g1_i1;TRINITY_DN72225_c1_g1_i3;TRINITY_DN72656_c0_g1_i14;TRINITY_DN74411_c1_g1_i1;TRINITY_DN76428_c0_g1_i1;TRINITY_DN77451_c0_g4_i1;TRINITY_DN79343_c0_g1_i2;TRINITY_DN80113_c0_g1_i1;TRINITY_DN80738_c1_g2_i1;TRINITY_DN80802_c3_g1_i1;TRINITY_DN80976_c2_g5_i1;TRINITY_DN81011_c0_g2_i4;TRINITY_DN81053_c0_g1_i1;TRINITY_DN90704_c2_g1_i…	http://www.kegg.jp/kegg-bin/show_pathway?ko03041	18
ko05169	Epstein-Barr virus infection	7/779	531/25278	0.997376	0.999875	TRINITY_DN66112_c0_g1_i3;TRINITY_DN73495_c1_g2_i3;TRINITY_DN74411_c1_g1_i1;TRINITY_DN79343_c0_g1_i2;TRINITY_DN84779_c0_g2_i2;TRINITY_DN87852_c0_g8_i2;TRINITY_DN90675_c3_g3_i2	http://www.kegg.jp/kegg-bin/show_pathway?ko05169	7
ko03012	Translation factors	6/779	507/25278	0.998517	0.999875	TRINITY_DN71323_c1_g3_i5;TRINITY_DN71442_c0_g2_i1;TRINITY_DN77953_c1_g1_i1;TRINITY_DN80086_c0_g1_i1;TRINITY_DN88985_c2_g4_i3;TRINITY_DN93148_c3_g8_i2	http://www.kegg.jp/kegg-bin/show_pathway?ko03012	6
ko00190	Oxidative phosphorylation	4/779	408/25278	0.998775	0.999875	TRINITY_DN79715_c0_g6_i1;TRINITY_DN81207_c1_g1_i8;TRINITY_DN83913_c3_g5_i1;TRINITY_DN96171_c2_g2_i2	http://www.kegg.jp/kegg-bin/show_pathway?ko00190	4
ko00240	Pyrimidine metabolism	4/779	414/25278	0.998945	0.999875	TRINITY_DN63968_c0_g1_i1;TRINITY_DN66112_c0_g1_i3;TRINITY_DN86212_c2_g3_i4;TRINITY_DN93805_c2_g1_i3	http://www.kegg.jp/kegg-bin/show_pathway?ko00240	4
ko03051	Proteasome	2/779	306/25278	0.999292	0.999875	TRINITY_DN74411_c1_g1_i1;TRINITY_DN79343_c0_g1_i2	http://www.kegg.jp/kegg-bin/show_pathway?ko03051	2
ko03015	mRNA surveillance pathway	2/779	321/25278	0.99954	0.999875	TRINITY_DN79488_c1_g6_i1;TRINITY_DN80738_c1_g2_i1	http://www.kegg.jp/kegg-bin/show_pathway?ko03015	2
ko00970	Aminoacyl-tRNA biosynthesis	1/779	246/25278	0.999564	0.999875	TRINITY_DN80655_c2_g4_i2	http://www.kegg.jp/kegg-bin/show_pathway?ko00970	1
ko03016	Transfer RNA biogenesis	9/779	737/25278	0.999735	0.999875	TRINITY_DN71323_c1_g3_i5;TRINITY_DN71529_c0_g1_i5;TRINITY_DN77340_c1_g4_i2;TRINITY_DN80449_c10_g1_i4;TRINITY_DN80655_c2_g4_i2;TRINITY_DN81710_c1_g6_i1;TRINITY_DN86458_c3_g1_i5;TRINITY_DN87659_c0_g1_i4;TRINITY_DN96624_c3_g1_i7	http://www.kegg.jp/kegg-bin/show_pathway?ko03016	9
ko01007	Amino acid related enzymes	2/779	349/25278	0.999796	0.999875	TRINITY_DN61909_c0_g1_i1;TRINITY_DN80655_c2_g4_i2	http://www.kegg.jp/kegg-bin/show_pathway?ko01007	2
ko03029	Mitochondrial biogenesis	19/779	1245/25278	0.999875	0.999875	TRINITY_DN74411_c1_g1_i1;TRINITY_DN74802_c4_g3_i1;TRINITY_DN77953_c1_g1_i1;TRINITY_DN78158_c0_g7_i1;TRINITY_DN78742_c2_g2_i1;TRINITY_DN79343_c0_g1_i2;TRINITY_DN81757_c2_g1_i6;TRINITY_DN82498_c0_g4_i1;TRINITY_DN82498_c0_g2_i4;TRINITY_DN82498_c1_g1_i6;TRINITY_DN82498_c1_g5_i1;TRINITY_DN83689_c5_g1_i1;TRINITY_DN86458_c3_g1_i5;TRINITY_DN86786_c1_g1_i3;TRINITY_DN91595_c5_g3_i1;TRINITY_DN94105_c3_g10_i…	http://www.kegg.jp/kegg-bin/show_pathway?ko03029	19

## Sheet: OE12 vs CK_KEGG_Enrichment
Table 11 The KEGG enrichment of DEGs in OE12 vs CK
ID	Term	GeneRatio	BgRatio	pvalue	qvalue	Genes	Input Hyperlink	Count
ko00940	Phenylpropanoid biosynthesis	46/926	378/25278	1.05223e-12	3.68281e-10	TRINITY_DN65523_c0_g1_i1;TRINITY_DN66449_c1_g1_i1;TRINITY_DN66812_c0_g1_i1;TRINITY_DN67749_c0_g1_i3;TRINITY_DN69214_c0_g1_i1;TRINITY_DN69814_c0_g1_i4;TRINITY_DN70625_c0_g2_i1;TRINITY_DN71192_c0_g1_i1;TRINITY_DN72351_c0_g5_i1;TRINITY_DN72351_c0_g3_i4;TRINITY_DN74322_c3_g4_i1;TRINITY_DN75166_c0_g1_i11;TRINITY_DN75840_c0_g1_i1;TRINITY_DN75840_c0_g2_i5;TRINITY_DN77464_c0_g1_i6;TRINITY_DN80088_c0_g1_i…	http://www.kegg.jp/kegg-bin/show_pathway?ko00940	46
ko00430	Taurine and hypotaurine metabolism	13/926	39/25278	6.60519e-10	1.15591e-07	TRINITY_DN73707_c0_g2_i2;TRINITY_DN73888_c0_g3_i2;TRINITY_DN73888_c0_g6_i1;TRINITY_DN73888_c0_g2_i3;TRINITY_DN73888_c0_g1_i4;TRINITY_DN78566_c2_g2_i2;TRINITY_DN82427_c0_g1_i3;TRINITY_DN82427_c0_g2_i8;TRINITY_DN92365_c0_g3_i1;TRINITY_DN95169_c0_g1_i2;TRINITY_DN95169_c2_g4_i1;TRINITY_DN95169_c2_g2_i14;TRINITY_DN96562_c9_g1_i1	http://www.kegg.jp/kegg-bin/show_pathway?ko00430	13
ko02024	Quorum sensing	31/926	245/25278	2.03658e-09	2.37601e-07	TRINITY_DN66491_c1_g2_i4;TRINITY_DN71829_c1_g1_i1;TRINITY_DN73707_c0_g2_i2;TRINITY_DN73888_c0_g3_i2;TRINITY_DN73888_c0_g6_i1;TRINITY_DN73888_c0_g2_i3;TRINITY_DN73888_c0_g1_i4;TRINITY_DN74213_c0_g6_i3;TRINITY_DN74709_c3_g6_i1;TRINITY_DN74709_c3_g2_i5;TRINITY_DN74709_c3_g7_i1;TRINITY_DN77975_c1_g1_i2;TRINITY_DN77975_c2_g2_i1;TRINITY_DN77975_c2_g1_i3;TRINITY_DN78078_c0_g1_i1;TRINITY_DN81835_c2_g1_i3…	http://www.kegg.jp/kegg-bin/show_pathway?ko02024	31
ko04727	GABAergic synapse	15/926	66/25278	1.20069e-08	1.0506e-06	TRINITY_DN68555_c0_g1_i2;TRINITY_DN73707_c0_g2_i2;TRINITY_DN73888_c0_g3_i2;TRINITY_DN73888_c0_g6_i1;TRINITY_DN73888_c0_g2_i3;TRINITY_DN73888_c0_g1_i4;TRINITY_DN79988_c4_g1_i2;TRINITY_DN82427_c0_g1_i3;TRINITY_DN82427_c0_g2_i8;TRINITY_DN88186_c0_g1_i9;TRINITY_DN92365_c0_g3_i1;TRINITY_DN95169_c0_g1_i2;TRINITY_DN95169_c2_g4_i1;TRINITY_DN95169_c2_g2_i14;TRINITY_DN96562_c9_g1_i1	http://www.kegg.jp/kegg-bin/show_pathway?ko04727	15
ko00199	Cytochrome P450	34/926	312/25278	1.64719e-08	1.15303e-06	TRINITY_DN47199_c0_g1_i1;TRINITY_DN69553_c0_g1_i1;TRINITY_DN69661_c0_g2_i1;TRINITY_DN71418_c0_g1_i9;TRINITY_DN71536_c0_g1_i2;TRINITY_DN71536_c0_g2_i4;TRINITY_DN71726_c4_g2_i1;TRINITY_DN72010_c2_g1_i1;TRINITY_DN72701_c3_g1_i4;TRINITY_DN72719_c1_g8_i2;TRINITY_DN74000_c1_g1_i2;TRINITY_DN74279_c0_g2_i4;TRINITY_DN75338_c0_g1_i1;TRINITY_DN75338_c0_g4_i1;TRINITY_DN78546_c5_g3_i2;TRINITY_DN82128_c1_g2_i2…	http://www.kegg.jp/kegg-bin/show_pathway?ko00199	34
ko05226	Gastric cancer	26/926	210/25278	6.27508e-08	3.66047e-06	TRINITY_DN70952_c0_g2_i3;TRINITY_DN72538_c0_g1_i2;TRINITY_DN72706_c0_g1_i3;TRINITY_DN72850_c4_g2_i16;TRINITY_DN73594_c1_g1_i2;TRINITY_DN73594_c1_g4_i1;TRINITY_DN73980_c1_g6_i1;TRINITY_DN76359_c8_g1_i1;TRINITY_DN80140_c0_g5_i1;TRINITY_DN84214_c0_g1_i5;TRINITY_DN84529_c2_g2_i5;TRINITY_DN84888_c1_g3_i1;TRINITY_DN84888_c1_g4_i1;TRINITY_DN85796_c6_g1_i3;TRINITY_DN86356_c0_g1_i7;TRINITY_DN89942_c1_g3_i…	http://www.kegg.jp/kegg-bin/show_pathway?ko05226	26
ko00040	Pentose and glucuronate interconversions	28/926	250/25278	1.69005e-07	8.45025e-06	TRINITY_DN65109_c0_g1_i2;TRINITY_DN68306_c0_g1_i1;TRINITY_DN68994_c0_g1_i2;TRINITY_DN71497_c0_g1_i1;TRINITY_DN71829_c1_g1_i1;TRINITY_DN72174_c0_g1_i2;TRINITY_DN74213_c0_g6_i3;TRINITY_DN74709_c3_g6_i1;TRINITY_DN74709_c3_g2_i5;TRINITY_DN74709_c3_g7_i1;TRINITY_DN74830_c0_g1_i3;TRINITY_DN75535_c0_g5_i1;TRINITY_DN77975_c1_g1_i2;TRINITY_DN77975_c2_g2_i1;TRINITY_DN77975_c2_g1_i3;TRINITY_DN79035_c1_g2_i7…	http://www.kegg.jp/kegg-bin/show_pathway?ko00040	28
ko04940	Type I diabetes mellitus	13/926	60/25278	2.06021e-07	9.01344e-06	TRINITY_DN73707_c0_g2_i2;TRINITY_DN73888_c0_g3_i2;TRINITY_DN73888_c0_g6_i1;TRINITY_DN73888_c0_g2_i3;TRINITY_DN73888_c0_g1_i4;TRINITY_DN82427_c0_g1_i3;TRINITY_DN82427_c0_g2_i8;TRINITY_DN92365_c0_g3_i1;TRINITY_DN93828_c1_g7_i1;TRINITY_DN95169_c0_g1_i2;TRINITY_DN95169_c2_g4_i1;TRINITY_DN95169_c2_g2_i14;TRINITY_DN96562_c9_g1_i1	http://www.kegg.jp/kegg-bin/show_pathway?ko04940	13
ko00941	Flavonoid biosynthesis	22/926	181/25278	8.76587e-07	3.40895e-05	TRINITY_DN47199_c0_g1_i1;TRINITY_DN71013_c0_g3_i2;TRINITY_DN72482_c0_g2_i1;TRINITY_DN76557_c0_g2_i4;TRINITY_DN76557_c0_g5_i1;TRINITY_DN76718_c2_g2_i1;TRINITY_DN76718_c2_g4_i1;TRINITY_DN76718_c2_g3_i2;TRINITY_DN77590_c0_g5_i1;TRINITY_DN77590_c0_g8_i1;TRINITY_DN80800_c1_g1_i11;TRINITY_DN85132_c3_g1_i3;TRINITY_DN88507_c1_g1_i5;TRINITY_DN89151_c0_g1_i9;TRINITY_DN90401_c1_g2_i3;TRINITY_DN90401_c1_g1_i…	http://www.kegg.jp/kegg-bin/show_pathway?ko00941	22
ko04913	Ovarian Steroidogenesis	16/926	107/25278	1.76805e-06	6.18817e-05	TRINITY_DN71418_c0_g1_i9;TRINITY_DN71726_c4_g2_i1;TRINITY_DN72010_c2_g1_i1;TRINITY_DN72719_c1_g8_i2;TRINITY_DN74000_c1_g1_i2;TRINITY_DN74279_c0_g2_i4;TRINITY_DN75338_c0_g1_i1;TRINITY_DN75338_c0_g4_i1;TRINITY_DN78546_c5_g3_i2;TRINITY_DN85350_c0_g3_i1;TRINITY_DN87268_c0_g3_i1;TRINITY_DN89556_c3_g4_i2;TRINITY_DN90007_c0_g4_i3;TRINITY_DN90711_c0_g8_i1;TRINITY_DN94260_c0_g1_i1;TRINITY_DN94260_c1_g1_i6	http://www.kegg.jp/kegg-bin/show_pathway?ko04913	16
ko00140	Steroid hormone biosynthesis	17/926	123/25278	2.59205e-06	8.24744e-05	TRINITY_DN65237_c0_g1_i1;TRINITY_DN71418_c0_g1_i9;TRINITY_DN71726_c4_g2_i1;TRINITY_DN72010_c2_g1_i1;TRINITY_DN72719_c1_g8_i2;TRINITY_DN74000_c1_g1_i2;TRINITY_DN74279_c0_g2_i4;TRINITY_DN75338_c0_g1_i1;TRINITY_DN75338_c0_g4_i1;TRINITY_DN78546_c5_g3_i2;TRINITY_DN85350_c0_g3_i1;TRINITY_DN87268_c0_g3_i1;TRINITY_DN89556_c3_g4_i2;TRINITY_DN90007_c0_g4_i3;TRINITY_DN90711_c0_g8_i1;TRINITY_DN94260_c0_g1_i1…	http://www.kegg.jp/kegg-bin/show_pathway?ko00140	17
ko00073	Cutin, suberine and wax biosynthesis	14/926	89/25278	4.2155e-06	0.000122952	TRINITY_DN56019_c1_g1_i1;TRINITY_DN63938_c0_g1_i1;TRINITY_DN69553_c0_g1_i1;TRINITY_DN73326_c0_g1_i1;TRINITY_DN73326_c0_g3_i3;TRINITY_DN73326_c0_g2_i7;TRINITY_DN78825_c0_g1_i2;TRINITY_DN85437_c0_g2_i10;TRINITY_DN87382_c1_g8_i3;TRINITY_DN90688_c3_g3_i2;TRINITY_DN91524_c0_g3_i2;TRINITY_DN91524_c0_g4_i2;TRINITY_DN91696_c0_g2_i1;TRINITY_DN94463_c0_g1_i3	http://www.kegg.jp/kegg-bin/show_pathway?ko00073	14
ko04666	Fc gamma R-mediated phagocytosis	19/926	165/25278	1.05931e-05	0.000285199	TRINITY_DN69624_c0_g1_i3;TRINITY_DN71607_c0_g4_i1;TRINITY_DN71607_c0_g1_i7;TRINITY_DN72538_c0_g1_i2;TRINITY_DN73594_c1_g1_i2;TRINITY_DN73594_c1_g4_i1;TRINITY_DN80140_c0_g5_i1;TRINITY_DN84888_c1_g3_i1;TRINITY_DN84888_c1_g4_i1;TRINITY_DN85796_c6_g1_i3;TRINITY_DN86356_c0_g1_i7;TRINITY_DN87734_c1_g1_i1;TRINITY_DN87734_c1_g6_i1;TRINITY_DN87734_c1_g5_i4;TRINITY_DN89942_c1_g3_i1;TRINITY_DN93149_c1_g1_i1…	http://www.kegg.jp/kegg-bin/show_pathway?ko04666	19
ko04090	CD Molecules	17/926	149/25278	3.42748e-05	0.00085687	TRINITY_DN67641_c0_g2_i3;TRINITY_DN70952_c0_g2_i3;TRINITY_DN72706_c0_g1_i3;TRINITY_DN72850_c4_g2_i16;TRINITY_DN73980_c1_g6_i1;TRINITY_DN76359_c8_g1_i1;TRINITY_DN84214_c0_g1_i5;TRINITY_DN84529_c2_g2_i5;TRINITY_DN89911_c1_g7_i1;TRINITY_DN90446_c3_g4_i1;TRINITY_DN90446_c3_g1_i10;TRINITY_DN92713_c1_g3_i1;TRINITY_DN92713_c1_g5_i1;TRINITY_DN97085_c2_g1_i2;TRINITY_DN97085_c3_g9_i1;TRINITY_DN97343_c0_g1_…	http://www.kegg.jp/kegg-bin/show_pathway?ko04090	17
ko04371	Apelin signaling pathway	21/926	214/25278	4.29999e-05	0.000958665	TRINITY_DN70077_c0_g1_i2;TRINITY_DN72538_c0_g1_i2;TRINITY_DN73594_c1_g1_i2;TRINITY_DN73594_c1_g4_i1;TRINITY_DN74802_c4_g3_i1;TRINITY_DN76659_c4_g1_i1;TRINITY_DN78742_c2_g2_i1;TRINITY_DN80140_c0_g5_i1;TRINITY_DN81757_c2_g1_i6;TRINITY_DN82498_c0_g4_i1;TRINITY_DN82498_c0_g2_i4;TRINITY_DN82498_c1_g1_i6;TRINITY_DN82498_c1_g5_i1;TRINITY_DN82498_c1_g9_i1;TRINITY_DN84888_c1_g3_i1;TRINITY_DN84888_c1_g4_i1…	http://www.kegg.jp/kegg-bin/show_pathway?ko04371	21
ko05221	Acute myeloid leukemia	10/926	58/25278	4.38247e-05	0.000958665	TRINITY_DN72538_c0_g1_i2;TRINITY_DN73594_c1_g1_i2;TRINITY_DN73594_c1_g4_i1;TRINITY_DN80140_c0_g5_i1;TRINITY_DN84888_c1_g3_i1;TRINITY_DN84888_c1_g4_i1;TRINITY_DN85796_c6_g1_i3;TRINITY_DN86356_c0_g1_i7;TRINITY_DN89942_c1_g3_i1;TRINITY_DN95323_c0_g7_i2	http://www.kegg.jp/kegg-bin/show_pathway?ko05221	10
ko04140	Autophagy - animal	24/926	265/25278	4.67174e-05	0.00096183	TRINITY_DN70222_c0_g3_i2;TRINITY_DN72538_c0_g1_i2;TRINITY_DN72550_c0_g4_i1;TRINITY_DN72550_c0_g1_i13;TRINITY_DN73594_c1_g1_i2;TRINITY_DN73594_c1_g4_i1;TRINITY_DN74802_c4_g3_i1;TRINITY_DN76659_c4_g1_i1;TRINITY_DN78194_c2_g2_i3;TRINITY_DN78742_c2_g2_i1;TRINITY_DN80140_c0_g5_i1;TRINITY_DN81757_c2_g1_i6;TRINITY_DN82498_c0_g4_i1;TRINITY_DN82498_c0_g2_i4;TRINITY_DN82498_c1_g1_i6;TRINITY_DN82498_c1_g5_i…	http://www.kegg.jp/kegg-bin/show_pathway?ko04140	24
ko04976	Bile secretion	18/926	177/25278	9.37272e-05	0.00182247	TRINITY_DN70952_c0_g2_i3;TRINITY_DN72706_c0_g1_i3;TRINITY_DN72850_c4_g2_i16;TRINITY_DN73642_c0_g4_i8;TRINITY_DN73980_c1_g6_i1;TRINITY_DN76359_c8_g1_i1;TRINITY_DN84214_c0_g1_i5;TRINITY_DN84529_c2_g2_i5;TRINITY_DN89911_c1_g7_i1;TRINITY_DN90446_c3_g4_i1;TRINITY_DN90446_c3_g1_i10;TRINITY_DN92713_c1_g3_i1;TRINITY_DN92713_c1_g5_i1;TRINITY_DN96523_c2_g3_i1;TRINITY_DN97085_c2_g1_i2;TRINITY_DN97085_c3_g9_…	http://www.kegg.jp/kegg-bin/show_pathway?ko04976	18
ko04210	Apoptosis	13/926	103/25278	0.000100081	0.0018436	TRINITY_DN67891_c0_g1_i1;TRINITY_DN70222_c0_g3_i2;TRINITY_DN72538_c0_g1_i2;TRINITY_DN73594_c1_g1_i2;TRINITY_DN73594_c1_g4_i1;TRINITY_DN77266_c0_g5_i1;TRINITY_DN78194_c2_g2_i3;TRINITY_DN80140_c0_g5_i1;TRINITY_DN81430_c0_g4_i1;TRINITY_DN81430_c0_g1_i3;TRINITY_DN84959_c0_g2_i5;TRINITY_DN89549_c0_g1_i12;TRINITY_DN89942_c1_g3_i1	http://www.kegg.jp/kegg-bin/show_pathway?ko04210	13
ko00410	beta-Alanine metabolism	18/926	180/25278	0.000116278	0.00194195	TRINITY_DN71668_c0_g1_i1;TRINITY_DN72718_c3_g5_i1;TRINITY_DN73707_c0_g2_i2;TRINITY_DN73888_c0_g3_i2;TRINITY_DN73888_c0_g6_i1;TRINITY_DN73888_c0_g2_i3;TRINITY_DN73888_c0_g1_i4;TRINITY_DN77316_c0_g10_i1;TRINITY_DN82427_c0_g1_i3;TRINITY_DN82427_c0_g2_i8;TRINITY_DN84687_c5_g1_i14;TRINITY_DN90408_c0_g6_i1;TRINITY_DN92365_c0_g3_i1;TRINITY_DN93848_c0_g1_i8;TRINITY_DN95169_c0_g1_i2;TRINITY_DN95169_c2_g4_…	http://www.kegg.jp/kegg-bin/show_pathway?ko00410	18
ko04012	ErbB signaling pathway	10/926	65/25278	0.000119328	0.00194195	TRINITY_DN72538_c0_g1_i2;TRINITY_DN73594_c1_g1_i2;TRINITY_DN73594_c1_g4_i1;TRINITY_DN80140_c0_g5_i1;TRINITY_DN84888_c1_g3_i1;TRINITY_DN84888_c1_g4_i1;TRINITY_DN85796_c6_g1_i3;TRINITY_DN86356_c0_g1_i7;TRINITY_DN89942_c1_g3_i1;TRINITY_DN95323_c0_g7_i2	http://www.kegg.jp/kegg-bin/show_pathway?ko04012	10
ko00650	Butanoate metabolism	13/926	105/25278	0.000122065	0.00194195	TRINITY_DN67334_c0_g3_i3;TRINITY_DN73707_c0_g2_i2;TRINITY_DN73888_c0_g3_i2;TRINITY_DN73888_c0_g6_i1;TRINITY_DN73888_c0_g2_i3;TRINITY_DN73888_c0_g1_i4;TRINITY_DN82427_c0_g1_i3;TRINITY_DN82427_c0_g2_i8;TRINITY_DN92365_c0_g3_i1;TRINITY_DN95169_c0_g1_i2;TRINITY_DN95169_c2_g4_i1;TRINITY_DN95169_c2_g2_i14;TRINITY_DN96562_c9_g1_i1	http://www.kegg.jp/kegg-bin/show_pathway?ko00650	13
ko00830	Retinol metabolism	14/926	120/25278	0.000129671	0.00197326	TRINITY_DN72010_c2_g1_i1;TRINITY_DN72701_c3_g1_i4;TRINITY_DN72719_c1_g8_i2;TRINITY_DN74000_c1_g1_i2;TRINITY_DN74279_c0_g2_i4;TRINITY_DN75338_c0_g1_i1;TRINITY_DN75338_c0_g4_i1;TRINITY_DN78546_c5_g3_i2;TRINITY_DN89556_c3_g4_i2;TRINITY_DN90007_c0_g4_i3;TRINITY_DN93289_c0_g2_i1;TRINITY_DN94260_c0_g1_i1;TRINITY_DN94260_c1_g1_i6;TRINITY_DN97053_c3_g2_i11	http://www.kegg.jp/kegg-bin/show_pathway?ko00830	14
ko03000	Transcription factors	53/926	858/25278	0.000158948	0.00229619	TRINITY_DN60713_c0_g1_i1;TRINITY_DN62693_c0_g1_i1;TRINITY_DN67856_c0_g1_i1;TRINITY_DN68539_c0_g1_i1;TRINITY_DN68780_c0_g2_i2;TRINITY_DN69240_c0_g1_i1;TRINITY_DN69766_c0_g2_i1;TRINITY_DN69811_c0_g1_i1;TRINITY_DN69811_c0_g2_i1;TRINITY_DN69811_c0_g4_i1;TRINITY_DN70450_c0_g1_i1;TRINITY_DN70584_c0_g1_i5;TRINITY_DN70539_c0_g1_i1;TRINITY_DN70635_c0_g1_i10;TRINITY_DN70736_c0_g1_i2;TRINITY_DN70871_c0_g1_i…	http://www.kegg.jp/kegg-bin/show_pathway?ko03000	53
ko05206	MicroRNAs in cancer	23/926	270/25278	0.000167214	0.00229619	TRINITY_DN69769_c2_g1_i1;TRINITY_DN70584_c0_g1_i5;TRINITY_DN70952_c0_g2_i3;TRINITY_DN72706_c0_g1_i3;TRINITY_DN72850_c4_g2_i16;TRINITY_DN73594_c1_g1_i2;TRINITY_DN73594_c1_g4_i1;TRINITY_DN73980_c1_g6_i1;TRINITY_DN76359_c8_g1_i1;TRINITY_DN81426_c2_g6_i2;TRINITY_DN84214_c0_g1_i5;TRINITY_DN84529_c2_g2_i5;TRINITY_DN89549_c0_g1_i12;TRINITY_DN89911_c1_g7_i1;TRINITY_DN90446_c3_g4_i1;TRINITY_DN90446_c3_g1_…	http://www.kegg.jp/kegg-bin/show_pathway?ko05206	23
ko04910	Insulin signaling pathway	26/926	324/25278	0.000170574	0.00229619	TRINITY_DN68250_c0_g3_i1;TRINITY_DN70077_c0_g1_i2;TRINITY_DN71792_c0_g4_i1;TRINITY_DN72538_c0_g1_i2;TRINITY_DN73594_c1_g1_i2;TRINITY_DN73594_c1_g4_i1;TRINITY_DN74802_c4_g3_i1;TRINITY_DN76659_c4_g1_i1;TRINITY_DN78194_c2_g2_i3;TRINITY_DN78742_c2_g2_i1;TRINITY_DN79729_c0_g1_i1;TRINITY_DN80140_c0_g5_i1;TRINITY_DN81757_c2_g1_i6;TRINITY_DN82498_c0_g4_i1;TRINITY_DN82498_c0_g2_i4;TRINITY_DN82498_c1_g1_i6…	http://www.kegg.jp/kegg-bin/show_pathway?ko04910	26
ko04710	Circadian rhythm	14/926	130/25278	0.000302459	0.00392076	TRINITY_DN74802_c4_g3_i1;TRINITY_DN76437_c5_g2_i1;TRINITY_DN76659_c4_g1_i1;TRINITY_DN77139_c0_g2_i1;TRINITY_DN77139_c0_g3_i1;TRINITY_DN78742_c2_g2_i1;TRINITY_DN81757_c2_g1_i6;TRINITY_DN82498_c0_g4_i1;TRINITY_DN82498_c0_g2_i4;TRINITY_DN82498_c1_g1_i6;TRINITY_DN82498_c1_g5_i1;TRINITY_DN82498_c1_g9_i1;TRINITY_DN88013_c3_g8_i1;TRINITY_DN95667_c2_g1_i7	http://www.kegg.jp/kegg-bin/show_pathway?ko04710	14
ko05212	Pancreatic cancer	10/926	73/25278	0.000318251	0.00397814	TRINITY_DN72538_c0_g1_i2;TRINITY_DN73594_c1_g1_i2;TRINITY_DN73594_c1_g4_i1;TRINITY_DN80140_c0_g5_i1;TRINITY_DN84888_c1_g3_i1;TRINITY_DN84888_c1_g4_i1;TRINITY_DN85796_c6_g1_i3;TRINITY_DN86356_c0_g1_i7;TRINITY_DN89942_c1_g3_i1;TRINITY_DN95323_c0_g7_i2	http://www.kegg.jp/kegg-bin/show_pathway?ko05212	10
ko00460	Cyanoamino acid metabolism	14/926	132/25278	0.0003542	0.00420905	TRINITY_DN74322_c3_g4_i1;TRINITY_DN75840_c0_g1_i1;TRINITY_DN75840_c0_g2_i5;TRINITY_DN80088_c0_g1_i5;TRINITY_DN85163_c2_g1_i3;TRINITY_DN85163_c2_g2_i5;TRINITY_DN85672_c0_g2_i7;TRINITY_DN87356_c1_g1_i4;TRINITY_DN89902_c1_g1_i7;TRINITY_DN89942_c0_g1_i1;TRINITY_DN89942_c0_g4_i1;TRINITY_DN93763_c0_g4_i1;TRINITY_DN93763_c0_g1_i9;TRINITY_DN94954_c2_g1_i17	http://www.kegg.jp/kegg-bin/show_pathway?ko00460	14
ko04150	mTOR signaling pathway	21/926	249/25278	0.000360776	0.00420905	TRINITY_DN72538_c0_g1_i2;TRINITY_DN73594_c1_g1_i2;TRINITY_DN73594_c1_g4_i1;TRINITY_DN74802_c4_g3_i1;TRINITY_DN76659_c4_g1_i1;TRINITY_DN78194_c2_g2_i3;TRINITY_DN78742_c2_g2_i1;TRINITY_DN80140_c0_g5_i1;TRINITY_DN81757_c2_g1_i6;TRINITY_DN82498_c0_g4_i1;TRINITY_DN82498_c0_g2_i4;TRINITY_DN82498_c1_g1_i6;TRINITY_DN82498_c1_g5_i1;TRINITY_DN82498_c1_g9_i1;TRINITY_DN84888_c1_g3_i1;TRINITY_DN84888_c1_g4_i1…	http://www.kegg.jp/kegg-bin/show_pathway?ko04150	21
ko04350	TGF-beta signaling pathway	13/926	118/25278	0.000393453	0.00434849	TRINITY_DN70584_c0_g1_i5;TRINITY_DN72538_c0_g1_i2;TRINITY_DN76437_c5_g2_i1;TRINITY_DN77139_c0_g2_i1;TRINITY_DN77139_c0_g3_i1;TRINITY_DN80140_c0_g5_i1;TRINITY_DN84888_c1_g3_i1;TRINITY_DN84888_c1_g4_i1;TRINITY_DN85796_c6_g1_i3;TRINITY_DN86356_c0_g1_i7;TRINITY_DN88013_c3_g8_i1;TRINITY_DN89942_c1_g3_i1;TRINITY_DN95323_c0_g7_i2	http://www.kegg.jp/kegg-bin/show_pathway?ko04350	13
ko05224	Breast cancer	10/926	75/25278	0.000397576	0.00434849	TRINITY_DN72538_c0_g1_i2;TRINITY_DN73594_c1_g1_i2;TRINITY_DN73594_c1_g4_i1;TRINITY_DN80140_c0_g5_i1;TRINITY_DN84888_c1_g3_i1;TRINITY_DN84888_c1_g4_i1;TRINITY_DN85796_c6_g1_i3;TRINITY_DN86356_c0_g1_i7;TRINITY_DN89942_c1_g3_i1;TRINITY_DN95323_c0_g7_i2	http://www.kegg.jp/kegg-bin/show_pathway?ko05224	10
ko00980	Metabolism of xenobiotics by cytochrome P450	18/926	201/25278	0.000455644	0.00483259	TRINITY_DN72010_c2_g1_i1;TRINITY_DN72144_c3_g1_i1;TRINITY_DN72719_c1_g8_i2;TRINITY_DN74000_c1_g1_i2;TRINITY_DN74279_c0_g2_i4;TRINITY_DN75338_c0_g1_i1;TRINITY_DN75338_c0_g4_i1;TRINITY_DN76967_c1_g5_i1;TRINITY_DN78546_c5_g3_i2;TRINITY_DN81698_c0_g5_i4;TRINITY_DN89556_c3_g4_i2;TRINITY_DN89925_c1_g2_i4;TRINITY_DN90007_c0_g4_i3;TRINITY_DN93289_c0_g2_i1;TRINITY_DN94260_c0_g1_i1;TRINITY_DN94260_c1_g1_i6…	http://www.kegg.jp/kegg-bin/show_pathway?ko00980	18
ko04211	Longevity regulating pathway - mammal	17/926	186/25278	0.000513573	0.00528678	TRINITY_DN74802_c4_g3_i1;TRINITY_DN76659_c4_g1_i1;TRINITY_DN78742_c2_g2_i1;TRINITY_DN81757_c2_g1_i6;TRINITY_DN82498_c0_g4_i1;TRINITY_DN82498_c0_g2_i4;TRINITY_DN82498_c1_g1_i6;TRINITY_DN82498_c1_g5_i1;TRINITY_DN82498_c1_g9_i1;TRINITY_DN84888_c1_g3_i1;TRINITY_DN84888_c1_g4_i1;TRINITY_DN85796_c6_g1_i3;TRINITY_DN86356_c0_g1_i7;TRINITY_DN90204_c2_g3_i5;TRINITY_DN90941_c0_g1_i8;TRINITY_DN95323_c0_g7_i2…	http://www.kegg.jp/kegg-bin/show_pathway?ko04211	17
ko00380	Tryptophan metabolism	17/926	188/25278	0.000580381	0.00580381	TRINITY_DN72010_c2_g1_i1;TRINITY_DN72719_c1_g8_i2;TRINITY_DN74000_c1_g1_i2;TRINITY_DN74279_c0_g2_i4;TRINITY_DN74358_c9_g6_i1;TRINITY_DN75338_c0_g1_i1;TRINITY_DN75338_c0_g4_i1;TRINITY_DN78546_c5_g3_i2;TRINITY_DN80141_c3_g2_i1;TRINITY_DN82731_c0_g4_i2;TRINITY_DN89409_c1_g3_i3;TRINITY_DN89556_c3_g4_i2;TRINITY_DN90007_c0_g4_i3;TRINITY_DN90204_c2_g3_i5;TRINITY_DN91188_c0_g1_i5;TRINITY_DN94260_c0_g1_i1…	http://www.kegg.jp/kegg-bin/show_pathway?ko00380	17
ko05204	Chemical carcinogenesis	17/926	190/25278	0.000654517	0.00636336	TRINITY_DN72010_c2_g1_i1;TRINITY_DN72144_c3_g1_i1;TRINITY_DN72719_c1_g8_i2;TRINITY_DN74000_c1_g1_i2;TRINITY_DN74279_c0_g2_i4;TRINITY_DN75338_c0_g1_i1;TRINITY_DN75338_c0_g4_i1;TRINITY_DN76967_c1_g5_i1;TRINITY_DN78546_c5_g3_i2;TRINITY_DN81698_c0_g5_i4;TRINITY_DN89556_c3_g4_i2;TRINITY_DN89925_c1_g2_i4;TRINITY_DN90007_c0_g4_i3;TRINITY_DN94260_c0_g1_i1;TRINITY_DN94260_c1_g1_i6;TRINITY_DN94609_c0_g1_i7…	http://www.kegg.jp/kegg-bin/show_pathway?ko05204	17
ko00250	Alanine, aspartate and glutamate metabolism	18/926	208/25278	0.000683484	0.00646539	TRINITY_DN68555_c0_g1_i2;TRINITY_DN71723_c2_g1_i1;TRINITY_DN71723_c2_g2_i1;TRINITY_DN73707_c0_g2_i2;TRINITY_DN73888_c0_g3_i2;TRINITY_DN73888_c0_g6_i1;TRINITY_DN73888_c0_g2_i3;TRINITY_DN73888_c0_g1_i4;TRINITY_DN82427_c0_g1_i3;TRINITY_DN82427_c0_g2_i8;TRINITY_DN84703_c6_g1_i1;TRINITY_DN87935_c1_g1_i4;TRINITY_DN92365_c0_g3_i1;TRINITY_DN92577_c0_g1_i5;TRINITY_DN95169_c0_g1_i2;TRINITY_DN95169_c2_g4_i1…	http://www.kegg.jp/kegg-bin/show_pathway?ko00250	18
ko05231	Choline metabolism in cancer	16/926	179/25278	0.000941197	0.00866892	TRINITY_DN72538_c0_g1_i2;TRINITY_DN73594_c1_g1_i2;TRINITY_DN73594_c1_g4_i1;TRINITY_DN78194_c2_g2_i3;TRINITY_DN80140_c0_g5_i1;TRINITY_DN84888_c1_g3_i1;TRINITY_DN84888_c1_g4_i1;TRINITY_DN85796_c6_g1_i3;TRINITY_DN86356_c0_g1_i7;TRINITY_DN87734_c1_g1_i1;TRINITY_DN87734_c1_g6_i1;TRINITY_DN87734_c1_g5_i4;TRINITY_DN89942_c1_g3_i1;TRINITY_DN93149_c1_g1_i14;TRINITY_DN95323_c0_g7_i2;TRINITY_DN95411_c1_g1_i2	http://www.kegg.jp/kegg-bin/show_pathway?ko05231	16
ko04917	Prolactin signaling pathway	10/926	86/25278	0.00118406	0.0106262	TRINITY_DN71418_c0_g1_i9;TRINITY_DN71726_c4_g2_i1;TRINITY_DN72538_c0_g1_i2;TRINITY_DN73594_c1_g1_i2;TRINITY_DN73594_c1_g4_i1;TRINITY_DN80140_c0_g5_i1;TRINITY_DN85350_c0_g3_i1;TRINITY_DN87268_c0_g3_i1;TRINITY_DN89942_c1_g3_i1;TRINITY_DN90711_c0_g8_i1	http://www.kegg.jp/kegg-bin/show_pathway?ko04917	10
ko04934	Cushing's syndrome	12/926	117/25278	0.00122739	0.0107397	TRINITY_DN71418_c0_g1_i9;TRINITY_DN71726_c4_g2_i1;TRINITY_DN72538_c0_g1_i2;TRINITY_DN73594_c1_g1_i2;TRINITY_DN73594_c1_g4_i1;TRINITY_DN80140_c0_g5_i1;TRINITY_DN80593_c0_g6_i1;TRINITY_DN85350_c0_g3_i1;TRINITY_DN87268_c0_g3_i1;TRINITY_DN89942_c1_g3_i1;TRINITY_DN90711_c0_g8_i1;TRINITY_DN92378_c0_g3_i2	http://www.kegg.jp/kegg-bin/show_pathway?ko04934	12
ko01521	EGFR tyrosine kinase inhibitor resistance	10/926	87/25278	0.00129478	0.011053	TRINITY_DN72538_c0_g1_i2;TRINITY_DN73594_c1_g1_i2;TRINITY_DN73594_c1_g4_i1;TRINITY_DN80140_c0_g5_i1;TRINITY_DN84888_c1_g3_i1;TRINITY_DN84888_c1_g4_i1;TRINITY_DN85796_c6_g1_i3;TRINITY_DN86356_c0_g1_i7;TRINITY_DN89942_c1_g3_i1;TRINITY_DN95323_c0_g7_i2	http://www.kegg.jp/kegg-bin/show_pathway?ko01521	10
ko04213	Longevity regulating pathway - multiple species	20/926	260/25278	0.00153427	0.0127856	TRINITY_DN74227_c5_g1_i1;TRINITY_DN74411_c0_g4_i1;TRINITY_DN74411_c1_g1_i1;TRINITY_DN74802_c4_g3_i1;TRINITY_DN76659_c4_g1_i1;TRINITY_DN78742_c2_g2_i1;TRINITY_DN79343_c0_g1_i2;TRINITY_DN81757_c2_g1_i6;TRINITY_DN82498_c0_g4_i1;TRINITY_DN82498_c0_g2_i4;TRINITY_DN82498_c1_g1_i6;TRINITY_DN82498_c1_g5_i1;TRINITY_DN82498_c1_g9_i1;TRINITY_DN84888_c1_g3_i1;TRINITY_DN84888_c1_g4_i1;TRINITY_DN85796_c6_g1_i3…	http://www.kegg.jp/kegg-bin/show_pathway?ko04213	20
ko04380	Osteoclast differentiation	9/926	75/25278	0.00164656	0.0134022	TRINITY_DN72538_c0_g1_i2;TRINITY_DN73594_c1_g1_i2;TRINITY_DN73594_c1_g4_i1;TRINITY_DN80140_c0_g5_i1;TRINITY_DN86234_c0_g1_i2;TRINITY_DN89942_c1_g3_i1;TRINITY_DN90944_c2_g1_i7;TRINITY_DN91933_c2_g1_i1;TRINITY_DN91933_c2_g2_i3	http://www.kegg.jp/kegg-bin/show_pathway?ko04380	9
ko05205	Proteoglycans in cancer	13/926	139/25278	0.00182732	0.0145355	TRINITY_DN72538_c0_g1_i2;TRINITY_DN73594_c1_g1_i2;TRINITY_DN73594_c1_g4_i1;TRINITY_DN76155_c1_g4_i2;TRINITY_DN76155_c1_g2_i17;TRINITY_DN78194_c2_g2_i3;TRINITY_DN80140_c0_g5_i1;TRINITY_DN84888_c1_g3_i1;TRINITY_DN84888_c1_g4_i1;TRINITY_DN85796_c6_g1_i3;TRINITY_DN86356_c0_g1_i7;TRINITY_DN89942_c1_g3_i1;TRINITY_DN95323_c0_g7_i2	http://www.kegg.jp/kegg-bin/show_pathway?ko05205	13
ko04726	Serotonergic synapse	7/926	50/25278	0.00218782	0.0170164	TRINITY_DN72538_c0_g1_i2;TRINITY_DN73594_c1_g1_i2;TRINITY_DN73594_c1_g4_i1;TRINITY_DN80140_c0_g5_i1;TRINITY_DN83575_c2_g3_i2;TRINITY_DN89942_c1_g3_i1;TRINITY_DN91370_c2_g5_i2	http://www.kegg.jp/kegg-bin/show_pathway?ko04726	7
ko04921	Oxytocin signaling pathway	17/926	213/25278	0.00227716	0.0170486	TRINITY_DN70077_c0_g1_i2;TRINITY_DN72538_c0_g1_i2;TRINITY_DN73594_c1_g1_i2;TRINITY_DN73594_c1_g4_i1;TRINITY_DN74802_c4_g3_i1;TRINITY_DN76659_c4_g1_i1;TRINITY_DN78742_c2_g2_i1;TRINITY_DN80140_c0_g5_i1;TRINITY_DN81223_c1_g2_i2;TRINITY_DN81757_c2_g1_i6;TRINITY_DN82498_c0_g4_i1;TRINITY_DN82498_c0_g2_i4;TRINITY_DN82498_c1_g1_i6;TRINITY_DN82498_c1_g5_i1;TRINITY_DN82498_c1_g9_i1;TRINITY_DN89942_c1_g3_i1…	http://www.kegg.jp/kegg-bin/show_pathway?ko04921	17
ko04068	FoxO signaling pathway	20/926	269/25278	0.00228938	0.0170486	TRINITY_DN70584_c0_g1_i5;TRINITY_DN72538_c0_g1_i2;TRINITY_DN73594_c1_g1_i2;TRINITY_DN73594_c1_g4_i1;TRINITY_DN74802_c4_g3_i1;TRINITY_DN76659_c4_g1_i1;TRINITY_DN78194_c2_g2_i3;TRINITY_DN78742_c2_g2_i1;TRINITY_DN80140_c0_g5_i1;TRINITY_DN81757_c2_g1_i6;TRINITY_DN82498_c0_g4_i1;TRINITY_DN82498_c0_g2_i4;TRINITY_DN82498_c1_g1_i6;TRINITY_DN82498_c1_g5_i1;TRINITY_DN82498_c1_g9_i1;TRINITY_DN89549_c0_g1_i1…	http://www.kegg.jp/kegg-bin/show_pathway?ko04068	20
ko00740	Riboflavin metabolism	6/926	38/25278	0.00240763	0.0175557	TRINITY_DN86234_c0_g1_i2;TRINITY_DN90573_c1_g3_i1;TRINITY_DN90944_c2_g1_i7;TRINITY_DN91933_c2_g1_i1;TRINITY_DN91933_c2_g2_i3;TRINITY_DN94146_c1_g4_i1	http://www.kegg.jp/kegg-bin/show_pathway?ko00740	6
ko05225	Hepatocellular carcinoma	17/926	217/25278	0.0027642	0.0195374	TRINITY_DN72144_c3_g1_i1;TRINITY_DN72538_c0_g1_i2;TRINITY_DN73594_c1_g1_i2;TRINITY_DN73594_c1_g4_i1;TRINITY_DN76967_c1_g5_i1;TRINITY_DN80140_c0_g5_i1;TRINITY_DN80567_c0_g6_i1;TRINITY_DN81698_c0_g5_i4;TRINITY_DN84888_c1_g3_i1;TRINITY_DN84888_c1_g4_i1;TRINITY_DN85796_c6_g1_i3;TRINITY_DN86356_c0_g1_i7;TRINITY_DN89942_c1_g3_i1;TRINITY_DN89925_c1_g2_i4;TRINITY_DN94609_c0_g1_i7;TRINITY_DN95323_c0_g7_i2…	http://www.kegg.jp/kegg-bin/show_pathway?ko05225	17
ko01001	Protein kinases	48/926	862/25278	0.00279106	0.0195374	TRINITY_DN70222_c0_g3_i2;TRINITY_DN72421_c2_g6_i3;TRINITY_DN72538_c0_g1_i2;TRINITY_DN73495_c1_g2_i3;TRINITY_DN73594_c1_g1_i2;TRINITY_DN73594_c1_g4_i1;TRINITY_DN73638_c3_g2_i10;TRINITY_DN74802_c4_g3_i1;TRINITY_DN75969_c0_g1_i3;TRINITY_DN76659_c4_g1_i1;TRINITY_DN77340_c1_g4_i2;TRINITY_DN78194_c2_g2_i3;TRINITY_DN78742_c2_g2_i1;TRINITY_DN79172_c3_g3_i4;TRINITY_DN79195_c5_g3_i1;TRINITY_DN79547_c2_g1_i…	http://www.kegg.jp/kegg-bin/show_pathway?ko01001	48
ko04912	GnRH signaling pathway	10/926	98/25278	0.00316559	0.0217246	TRINITY_DN70077_c0_g1_i2;TRINITY_DN72538_c0_g1_i2;TRINITY_DN73594_c1_g1_i2;TRINITY_DN73594_c1_g4_i1;TRINITY_DN80140_c0_g5_i1;TRINITY_DN87734_c1_g1_i1;TRINITY_DN87734_c1_g6_i1;TRINITY_DN87734_c1_g5_i4;TRINITY_DN89942_c1_g3_i1;TRINITY_DN95411_c1_g1_i2	http://www.kegg.jp/kegg-bin/show_pathway?ko04912	10
ko05410	Hypertrophic cardiomyopathy (HCM)	10/926	100/25278	0.00366596	0.0246159	TRINITY_DN74802_c4_g3_i1;TRINITY_DN76659_c4_g1_i1;TRINITY_DN78742_c2_g2_i1;TRINITY_DN81757_c2_g1_i6;TRINITY_DN82498_c0_g4_i1;TRINITY_DN82498_c0_g2_i4;TRINITY_DN82498_c1_g1_i6;TRINITY_DN82498_c1_g5_i1;TRINITY_DN82498_c1_g9_i1;TRINITY_DN95667_c2_g1_i7	http://www.kegg.jp/kegg-bin/show_pathway?ko05410	10
ko00514	Other types of O-glycan biosynthesis	5/926	29/25278	0.00372755	0.0246159	TRINITY_DN71502_c0_g1_i1;TRINITY_DN78731_c0_g2_i3;TRINITY_DN80642_c0_g5_i6;TRINITY_DN91793_c1_g1_i7;TRINITY_DN91793_c1_g3_i2	http://www.kegg.jp/kegg-bin/show_pathway?ko00514	5
ko04928	Parathyroid hormone synthesis, secretion and action	9/926	86/25278	0.00422571	0.0273888	TRINITY_DN72538_c0_g1_i2;TRINITY_DN73594_c1_g1_i2;TRINITY_DN73594_c1_g4_i1;TRINITY_DN80140_c0_g5_i1;TRINITY_DN87734_c1_g1_i1;TRINITY_DN87734_c1_g6_i1;TRINITY_DN87734_c1_g5_i4;TRINITY_DN89942_c1_g3_i1;TRINITY_DN95411_c1_g1_i2	http://www.kegg.jp/kegg-bin/show_pathway?ko04928	9
ko04931	Insulin resistance	16/926	208/25278	0.00432823	0.0275433	TRINITY_DN74802_c4_g3_i1;TRINITY_DN76659_c4_g1_i1;TRINITY_DN78194_c2_g2_i3;TRINITY_DN78742_c2_g2_i1;TRINITY_DN81757_c2_g1_i6;TRINITY_DN82498_c0_g4_i1;TRINITY_DN82498_c0_g2_i4;TRINITY_DN82498_c1_g1_i6;TRINITY_DN82498_c1_g5_i1;TRINITY_DN82498_c1_g9_i1;TRINITY_DN84888_c1_g3_i1;TRINITY_DN84888_c1_g4_i1;TRINITY_DN85796_c6_g1_i3;TRINITY_DN86356_c0_g1_i7;TRINITY_DN95323_c0_g7_i2;TRINITY_DN95667_c2_g1_i7	http://www.kegg.jp/kegg-bin/show_pathway?ko04931	16
ko02000	Transporters	93/926	1939/25278	0.00452734	0.0280239	TRINITY_DN45686_c0_g1_i1;TRINITY_DN58320_c0_g2_i1;TRINITY_DN67537_c4_g1_i1;TRINITY_DN69842_c2_g1_i1;TRINITY_DN69901_c1_g2_i3;TRINITY_DN70640_c1_g1_i2;TRINITY_DN70952_c0_g2_i3;TRINITY_DN71157_c0_g3_i1;TRINITY_DN71332_c0_g1_i2;TRINITY_DN71326_c0_g2_i9;TRINITY_DN72144_c3_g1_i1;TRINITY_DN72706_c0_g1_i3;TRINITY_DN72714_c0_g2_i1;TRINITY_DN72850_c4_g2_i16;TRINITY_DN73249_c0_g1_i4;TRINITY_DN73401_c0_g2_i…	http://www.kegg.jp/kegg-bin/show_pathway?ko02000	93
ko05020	Prion diseases	9/926	87/25278	0.00456389	0.0280239	TRINITY_DN48969_c0_g1_i1;TRINITY_DN65260_c1_g1_i1;TRINITY_DN72538_c0_g1_i2;TRINITY_DN73594_c1_g1_i2;TRINITY_DN73594_c1_g4_i1;TRINITY_DN79352_c2_g5_i3;TRINITY_DN80140_c0_g5_i1;TRINITY_DN89942_c1_g3_i1;TRINITY_DN90238_c5_g3_i3	http://www.kegg.jp/kegg-bin/show_pathway?ko05020	9
ko05210	Colorectal cancer	10/926	106/25278	0.00555107	0.0334979	TRINITY_DN72538_c0_g1_i2;TRINITY_DN73594_c1_g1_i2;TRINITY_DN73594_c1_g4_i1;TRINITY_DN80140_c0_g5_i1;TRINITY_DN84888_c1_g3_i1;TRINITY_DN84888_c1_g4_i1;TRINITY_DN85796_c6_g1_i3;TRINITY_DN86356_c0_g1_i7;TRINITY_DN89942_c1_g3_i1;TRINITY_DN95323_c0_g7_i2	http://www.kegg.jp/kegg-bin/show_pathway?ko05210	10
ko00910	Nitrogen metabolism	10/926	107/25278	0.00592789	0.0351655	TRINITY_DN68555_c0_g1_i2;TRINITY_DN73821_c5_g2_i1;TRINITY_DN77456_c0_g2_i1;TRINITY_DN82552_c2_g1_i1;TRINITY_DN82552_c2_g2_i1;TRINITY_DN87935_c1_g1_i4;TRINITY_DN90452_c1_g5_i4;TRINITY_DN90452_c1_g2_i3;TRINITY_DN93857_c0_g6_i1;TRINITY_DN94515_c2_g10_i1	http://www.kegg.jp/kegg-bin/show_pathway?ko00910	10
ko04920	Adipocytokine signaling pathway	12/926	143/25278	0.00644835	0.0376154	TRINITY_DN74802_c4_g3_i1;TRINITY_DN76659_c4_g1_i1;TRINITY_DN78078_c0_g1_i1;TRINITY_DN78742_c2_g2_i1;TRINITY_DN81757_c2_g1_i6;TRINITY_DN82498_c0_g4_i1;TRINITY_DN82498_c0_g2_i4;TRINITY_DN82498_c1_g1_i6;TRINITY_DN82498_c1_g5_i1;TRINITY_DN82498_c1_g9_i1;TRINITY_DN87264_c1_g5_i1;TRINITY_DN95667_c2_g1_i7	http://www.kegg.jp/kegg-bin/show_pathway?ko04920	12
ko04151	PI3K-Akt signaling pathway	23/926	357/25278	0.00667284	0.0382868	TRINITY_DN65260_c1_g1_i1;TRINITY_DN72538_c0_g1_i2;TRINITY_DN73594_c1_g1_i2;TRINITY_DN73594_c1_g4_i1;TRINITY_DN74802_c4_g3_i1;TRINITY_DN76659_c4_g1_i1;TRINITY_DN78194_c2_g2_i3;TRINITY_DN78742_c2_g2_i1;TRINITY_DN80140_c0_g5_i1;TRINITY_DN81757_c2_g1_i6;TRINITY_DN82498_c0_g4_i1;TRINITY_DN82498_c0_g2_i4;TRINITY_DN82498_c1_g1_i6;TRINITY_DN82498_c1_g5_i1;TRINITY_DN82498_c1_g9_i1;TRINITY_DN84888_c1_g3_i1…	http://www.kegg.jp/kegg-bin/show_pathway?ko04151	23
ko00360	Phenylalanine metabolism	12/926	148/25278	0.00840251	0.0460084	TRINITY_DN65523_c0_g1_i1;TRINITY_DN74358_c9_g6_i1;TRINITY_DN75256_c0_g2_i1;TRINITY_DN75256_c0_g1_i2;TRINITY_DN80141_c3_g2_i1;TRINITY_DN84687_c5_g1_i14;TRINITY_DN90401_c1_g2_i3;TRINITY_DN90401_c1_g1_i3;TRINITY_DN90326_c0_g1_i5;TRINITY_DN90408_c0_g6_i1;TRINITY_DN91188_c0_g1_i5;TRINITY_DN95473_c1_g7_i2	http://www.kegg.jp/kegg-bin/show_pathway?ko00360	12
ko00512	Mucin type O-glycan biosynthesis	3/926	12/25278	0.00841297	0.0460084	TRINITY_DN77164_c0_g2_i1;TRINITY_DN82472_c1_g2_i1;TRINITY_DN82472_c2_g1_i1	http://www.kegg.jp/kegg-bin/show_pathway?ko00512	3
ko00533	Glycosaminoglycan biosynthesis - keratan sulfate	3/926	12/25278	0.00841297	0.0460084	TRINITY_DN77164_c0_g2_i1;TRINITY_DN82472_c1_g2_i1;TRINITY_DN82472_c2_g1_i1	http://www.kegg.jp/kegg-bin/show_pathway?ko00533	3
ko04152	AMPK signaling pathway	19/926	286/25278	0.00950665	0.0511896	TRINITY_DN68250_c0_g3_i1;TRINITY_DN73642_c0_g4_i8;TRINITY_DN74802_c4_g3_i1;TRINITY_DN76659_c4_g1_i1;TRINITY_DN78194_c2_g2_i3;TRINITY_DN78742_c2_g2_i1;TRINITY_DN81757_c2_g1_i6;TRINITY_DN82498_c0_g4_i1;TRINITY_DN82498_c0_g2_i4;TRINITY_DN82498_c1_g1_i6;TRINITY_DN82498_c1_g5_i1;TRINITY_DN82498_c1_g9_i1;TRINITY_DN84888_c1_g3_i1;TRINITY_DN84888_c1_g4_i1;TRINITY_DN85796_c6_g1_i3;TRINITY_DN86356_c0_g1_i7…	http://www.kegg.jp/kegg-bin/show_pathway?ko04152	19
ko00053	Ascorbate and aldarate metabolism	14/926	192/25278	0.0114205	0.0602554	TRINITY_DN74580_c1_g3_i1;TRINITY_DN74830_c0_g1_i3;TRINITY_DN75739_c1_g2_i1;TRINITY_DN77314_c0_g2_i2;TRINITY_DN78525_c1_g2_i1;TRINITY_DN78525_c1_g1_i3;TRINITY_DN86753_c2_g7_i1;TRINITY_DN87313_c1_g1_i9;TRINITY_DN88949_c1_g2_i6;TRINITY_DN88949_c1_g6_i1;TRINITY_DN90963_c0_g3_i1;TRINITY_DN92087_c2_g2_i2;TRINITY_DN95347_c5_g2_i1;TRINITY_DN95935_c2_g1_i2	http://www.kegg.jp/kegg-bin/show_pathway?ko00053	14
ko05223	Non-small cell lung cancer	6/926	52/25278	0.0115346	0.0602554	TRINITY_DN72538_c0_g1_i2;TRINITY_DN73594_c1_g1_i2;TRINITY_DN73594_c1_g4_i1;TRINITY_DN78194_c2_g2_i3;TRINITY_DN80140_c0_g5_i1;TRINITY_DN89942_c1_g3_i1	http://www.kegg.jp/kegg-bin/show_pathway?ko05223	6
ko04927	Cortisol synthesis and secretion	5/926	38/25278	0.0120258	0.0616111	TRINITY_DN71418_c0_g1_i9;TRINITY_DN71726_c4_g2_i1;TRINITY_DN85350_c0_g3_i1;TRINITY_DN87268_c0_g3_i1;TRINITY_DN90711_c0_g8_i1	http://www.kegg.jp/kegg-bin/show_pathway?ko04927	5
ko04142	Lysosome	11/926	137/25278	0.0121462	0.0616111	TRINITY_DN67891_c0_g1_i1;TRINITY_DN68994_c0_g1_i2;TRINITY_DN76176_c0_g1_i5;TRINITY_DN81430_c0_g4_i1;TRINITY_DN81430_c0_g1_i3;TRINITY_DN84959_c0_g2_i5;TRINITY_DN86234_c0_g1_i2;TRINITY_DN88852_c0_g5_i2;TRINITY_DN90944_c2_g1_i7;TRINITY_DN91933_c2_g1_i1;TRINITY_DN91933_c2_g2_i3	http://www.kegg.jp/kegg-bin/show_pathway?ko04142	11
ko00565	Ether lipid metabolism	8/926	88/25278	0.0153607	0.0768035	TRINITY_DN66491_c1_g2_i4;TRINITY_DN80339_c0_g1_i6;TRINITY_DN87734_c1_g1_i1;TRINITY_DN87734_c1_g6_i1;TRINITY_DN87734_c1_g5_i4;TRINITY_DN89454_c0_g4_i4;TRINITY_DN91952_c0_g1_i4;TRINITY_DN95411_c1_g1_i2	http://www.kegg.jp/kegg-bin/show_pathway?ko00565	8
ko01002	Peptidases	43/926	834/25278	0.0158589	0.0781779	TRINITY_DN67144_c0_g1_i1;TRINITY_DN67825_c0_g1_i1;TRINITY_DN67891_c0_g1_i1;TRINITY_DN68878_c0_g1_i1;TRINITY_DN71160_c3_g4_i2;TRINITY_DN71723_c2_g1_i1;TRINITY_DN71723_c2_g2_i1;TRINITY_DN72484_c0_g1_i5;TRINITY_DN72570_c0_g1_i6;TRINITY_DN73011_c0_g1_i10;TRINITY_DN73410_c0_g2_i6;TRINITY_DN74166_c5_g1_i4;TRINITY_DN75205_c1_g6_i1;TRINITY_DN75717_c4_g4_i1;TRINITY_DN76002_c0_g1_i1;TRINITY_DN76176_c0_g1_i…	http://www.kegg.jp/kegg-bin/show_pathway?ko01002	43
ko04664	Fc epsilon RI signaling pathway	6/926	56/25278	0.0162785	0.0791317	TRINITY_DN72538_c0_g1_i2;TRINITY_DN73594_c1_g1_i2;TRINITY_DN73594_c1_g4_i1;TRINITY_DN78194_c2_g2_i3;TRINITY_DN80140_c0_g5_i1;TRINITY_DN89942_c1_g3_i1	http://www.kegg.jp/kegg-bin/show_pathway?ko04664	6
ko05200	Pathways in cancer	24/926	409/25278	0.0165308	0.0792573	TRINITY_DN65260_c1_g1_i1;TRINITY_DN70077_c0_g1_i2;TRINITY_DN70584_c0_g1_i5;TRINITY_DN72144_c3_g1_i1;TRINITY_DN72538_c0_g1_i2;TRINITY_DN73594_c1_g1_i2;TRINITY_DN73594_c1_g4_i1;TRINITY_DN76437_c5_g2_i1;TRINITY_DN76967_c1_g5_i1;TRINITY_DN77139_c0_g2_i1;TRINITY_DN77139_c0_g3_i1;TRINITY_DN80140_c0_g5_i1;TRINITY_DN81698_c0_g5_i4;TRINITY_DN84888_c1_g3_i1;TRINITY_DN84888_c1_g4_i1;TRINITY_DN85796_c6_g1_i3…	http://www.kegg.jp/kegg-bin/show_pathway?ko05200	24
ko05219	Bladder cancer	5/926	42/25278	0.0180907	0.0844231	TRINITY_DN72538_c0_g1_i2;TRINITY_DN73594_c1_g1_i2;TRINITY_DN73594_c1_g4_i1;TRINITY_DN80140_c0_g5_i1;TRINITY_DN89942_c1_g3_i1	http://www.kegg.jp/kegg-bin/show_pathway?ko05219	5
ko01008	Polyketide biosynthesis proteins	5/926	42/25278	0.0180907	0.0844231	TRINITY_DN71013_c0_g3_i2;TRINITY_DN77590_c0_g5_i1;TRINITY_DN77590_c0_g8_i1;TRINITY_DN94747_c0_g5_i1;TRINITY_DN96704_c2_g1_i1	http://www.kegg.jp/kegg-bin/show_pathway?ko01008	5
ko04320	Dorso-ventral axis formation	5/926	43/25278	0.0198717	0.0915142	TRINITY_DN72538_c0_g1_i2;TRINITY_DN73594_c1_g1_i2;TRINITY_DN73594_c1_g4_i1;TRINITY_DN80140_c0_g5_i1;TRINITY_DN89942_c1_g3_i1	http://www.kegg.jp/kegg-bin/show_pathway?ko04320	5
ko04550	Signaling pathways regulating pluripotency of stem cells	6/926	60/25278	0.0222213	0.101006	TRINITY_DN70450_c0_g1_i1;TRINITY_DN72538_c0_g1_i2;TRINITY_DN73594_c1_g1_i2;TRINITY_DN73594_c1_g4_i1;TRINITY_DN80140_c0_g5_i1;TRINITY_DN89942_c1_g3_i1	http://www.kegg.jp/kegg-bin/show_pathway?ko04550	6
ko04620	Toll-like receptor signaling pathway	12/926	170/25278	0.0229554	0.103005	TRINITY_DN72538_c0_g1_i2;TRINITY_DN73495_c1_g2_i3;TRINITY_DN73594_c1_g1_i2;TRINITY_DN73594_c1_g4_i1;TRINITY_DN75969_c0_g1_i3;TRINITY_DN79547_c2_g1_i2;TRINITY_DN80140_c0_g5_i1;TRINITY_DN84779_c0_g2_i2;TRINITY_DN87852_c0_g8_i2;TRINITY_DN89942_c1_g3_i1;TRINITY_DN93709_c2_g2_i1;TRINITY_DN94852_c2_g1_i13	http://www.kegg.jp/kegg-bin/show_pathway?ko04620	12
ko04725	Cholinergic synapse	5/926	45/25278	0.0237689	0.105305	TRINITY_DN72538_c0_g1_i2;TRINITY_DN73594_c1_g1_i2;TRINITY_DN73594_c1_g4_i1;TRINITY_DN80140_c0_g5_i1;TRINITY_DN89942_c1_g3_i1	http://www.kegg.jp/kegg-bin/show_pathway?ko04725	5
ko04144	Endocytosis	25/926	448/25278	0.0253183	0.110767	TRINITY_DN68282_c0_g1_i1;TRINITY_DN69624_c0_g1_i3;TRINITY_DN72550_c0_g4_i1;TRINITY_DN72550_c0_g1_i13;TRINITY_DN73631_c1_g2_i1;TRINITY_DN74045_c1_g3_i1;TRINITY_DN74411_c0_g4_i1;TRINITY_DN74411_c1_g1_i1;TRINITY_DN76618_c0_g1_i2;TRINITY_DN79343_c0_g1_i2;TRINITY_DN82697_c2_g3_i1;TRINITY_DN82632_c1_g2_i2;TRINITY_DN85844_c2_g3_i1;TRINITY_DN87675_c2_g1_i2;TRINITY_DN87734_c1_g1_i1;TRINITY_DN87734_c1_g6_i…	http://www.kegg.jp/kegg-bin/show_pathway?ko04144	25
ko04926	Relaxin signaling pathway	5/926	46/25278	0.0258894	0.111868	TRINITY_DN72538_c0_g1_i2;TRINITY_DN73594_c1_g1_i2;TRINITY_DN73594_c1_g4_i1;TRINITY_DN80140_c0_g5_i1;TRINITY_DN89942_c1_g3_i1	http://www.kegg.jp/kegg-bin/show_pathway?ko04926	5
ko04724	Glutamatergic synapse	8/926	98/25278	0.0274639	0.117224	TRINITY_DN68555_c0_g1_i2;TRINITY_DN72538_c0_g1_i2;TRINITY_DN80140_c0_g5_i1;TRINITY_DN87734_c1_g1_i1;TRINITY_DN87734_c1_g6_i1;TRINITY_DN87734_c1_g5_i4;TRINITY_DN89942_c1_g3_i1;TRINITY_DN95411_c1_g1_i2	http://www.kegg.jp/kegg-bin/show_pathway?ko04724	8
ko04072	Phospholipase D signaling pathway	11/926	158/25278	0.0312632	0.130448	TRINITY_DN72538_c0_g1_i2;TRINITY_DN73594_c1_g1_i2;TRINITY_DN73594_c1_g4_i1;TRINITY_DN80140_c0_g5_i1;TRINITY_DN87675_c2_g1_i2;TRINITY_DN87734_c1_g1_i1;TRINITY_DN87734_c1_g6_i1;TRINITY_DN87734_c1_g5_i4;TRINITY_DN89942_c1_g3_i1;TRINITY_DN93149_c1_g1_i14;TRINITY_DN95411_c1_g1_i2	http://www.kegg.jp/kegg-bin/show_pathway?ko04072	11
ko04960	Aldosterone-regulated sodium reabsorption	4/926	33/25278	0.0315156	0.130448	TRINITY_DN72538_c0_g1_i2;TRINITY_DN78194_c2_g2_i3;TRINITY_DN80140_c0_g5_i1;TRINITY_DN89942_c1_g3_i1	http://www.kegg.jp/kegg-bin/show_pathway?ko04960	4
ko04722	Neurotrophin signaling pathway	15/926	240/25278	0.0316803	0.130448	TRINITY_DN70077_c0_g1_i2;TRINITY_DN72538_c0_g1_i2;TRINITY_DN73495_c1_g2_i3;TRINITY_DN73594_c1_g1_i2;TRINITY_DN73594_c1_g4_i1;TRINITY_DN74832_c0_g1_i2;TRINITY_DN75969_c0_g1_i3;TRINITY_DN78194_c2_g2_i3;TRINITY_DN79547_c2_g1_i2;TRINITY_DN80140_c0_g5_i1;TRINITY_DN84779_c0_g2_i2;TRINITY_DN87852_c0_g8_i2;TRINITY_DN89942_c1_g3_i1;TRINITY_DN93709_c2_g2_i1;TRINITY_DN94852_c2_g1_i13	http://www.kegg.jp/kegg-bin/show_pathway?ko04722	15
ko05216	Thyroid cancer	5/926	49/25278	0.0329607	0.134142	TRINITY_DN72538_c0_g1_i2;TRINITY_DN73594_c1_g1_i2;TRINITY_DN73594_c1_g4_i1;TRINITY_DN80140_c0_g5_i1;TRINITY_DN89942_c1_g3_i1	http://www.kegg.jp/kegg-bin/show_pathway?ko05216	5
ko04660	T cell receptor signaling pathway	6/926	66/25278	0.0336218	0.13526	TRINITY_DN72538_c0_g1_i2;TRINITY_DN73594_c1_g1_i2;TRINITY_DN73594_c1_g4_i1;TRINITY_DN78194_c2_g2_i3;TRINITY_DN80140_c0_g5_i1;TRINITY_DN89942_c1_g3_i1	http://www.kegg.jp/kegg-bin/show_pathway?ko04660	6
ko05152	Tuberculosis	20/926	352/25278	0.0359177	0.142854	TRINITY_DN68539_c0_g1_i1;TRINITY_DN70077_c0_g1_i2;TRINITY_DN70584_c0_g1_i5;TRINITY_DN72538_c0_g1_i2;TRINITY_DN72550_c0_g4_i1;TRINITY_DN72550_c0_g1_i13;TRINITY_DN73495_c1_g2_i3;TRINITY_DN75969_c0_g1_i3;TRINITY_DN77482_c0_g3_i1;TRINITY_DN79547_c2_g1_i2;TRINITY_DN80140_c0_g5_i1;TRINITY_DN82396_c7_g1_i4;TRINITY_DN84779_c0_g2_i2;TRINITY_DN87852_c0_g8_i2;TRINITY_DN89942_c1_g3_i1;TRINITY_DN93709_c2_g2_i…	http://www.kegg.jp/kegg-bin/show_pathway?ko05152	20
ko04010	MAPK signaling pathway	16/926	267/25278	0.0377423	0.148279	TRINITY_DN72538_c0_g1_i2;TRINITY_DN73495_c1_g2_i3;TRINITY_DN73594_c1_g1_i2;TRINITY_DN73594_c1_g4_i1;TRINITY_DN74411_c0_g4_i1;TRINITY_DN74411_c1_g1_i1;TRINITY_DN75913_c2_g1_i8;TRINITY_DN75969_c0_g1_i3;TRINITY_DN79343_c0_g1_i2;TRINITY_DN79547_c2_g1_i2;TRINITY_DN80140_c0_g5_i1;TRINITY_DN84779_c0_g2_i2;TRINITY_DN87852_c0_g8_i2;TRINITY_DN89942_c1_g3_i1;TRINITY_DN93709_c2_g2_i1;TRINITY_DN94852_c2_g1_i13	http://www.kegg.jp/kegg-bin/show_pathway?ko04010	16
ko05213	Endometrial cancer	6/926	68/25278	0.0381289	0.148279	TRINITY_DN72538_c0_g1_i2;TRINITY_DN73594_c1_g1_i2;TRINITY_DN73594_c1_g4_i1;TRINITY_DN78194_c2_g2_i3;TRINITY_DN80140_c0_g5_i1;TRINITY_DN89942_c1_g3_i1	http://www.kegg.jp/kegg-bin/show_pathway?ko05213	6
ko00604	Glycosphingolipid biosynthesis - ganglio series	3/926	21/25278	0.0398638	0.14994	TRINITY_DN77164_c0_g2_i1;TRINITY_DN82472_c1_g2_i1;TRINITY_DN82472_c2_g1_i1	http://www.kegg.jp/kegg-bin/show_pathway?ko00604	3
ko04066	HIF-1 signaling pathway	12/926	185/25278	0.0402391	0.14994	TRINITY_DN70584_c0_g1_i5;TRINITY_DN72538_c0_g1_i2;TRINITY_DN73594_c1_g1_i2;TRINITY_DN73594_c1_g4_i1;TRINITY_DN78072_c0_g2_i20;TRINITY_DN80140_c0_g5_i1;TRINITY_DN84888_c1_g3_i1;TRINITY_DN84888_c1_g4_i1;TRINITY_DN85796_c6_g1_i3;TRINITY_DN86356_c0_g1_i7;TRINITY_DN89942_c1_g3_i1;TRINITY_DN95323_c0_g7_i2	http://www.kegg.jp/kegg-bin/show_pathway?ko04066	12
ko05133	Pertussis	13/926	206/25278	0.0406353	0.14994	TRINITY_DN70077_c0_g1_i2;TRINITY_DN71607_c0_g4_i1;TRINITY_DN71607_c0_g1_i7;TRINITY_DN72538_c0_g1_i2;TRINITY_DN73495_c1_g2_i3;TRINITY_DN75969_c0_g1_i3;TRINITY_DN79547_c2_g1_i2;TRINITY_DN80140_c0_g5_i1;TRINITY_DN84779_c0_g2_i2;TRINITY_DN87852_c0_g8_i2;TRINITY_DN89942_c1_g3_i1;TRINITY_DN93709_c2_g2_i1;TRINITY_DN94852_c2_g1_i13	http://www.kegg.jp/kegg-bin/show_pathway?ko05133	13
ko05140	Leishmaniasis	10/926	145/25278	0.0410043	0.14994	TRINITY_DN72538_c0_g1_i2;TRINITY_DN73495_c1_g2_i3;TRINITY_DN75969_c0_g1_i3;TRINITY_DN79547_c2_g1_i2;TRINITY_DN80140_c0_g5_i1;TRINITY_DN84779_c0_g2_i2;TRINITY_DN87852_c0_g8_i2;TRINITY_DN89942_c1_g3_i1;TRINITY_DN93709_c2_g2_i1;TRINITY_DN94852_c2_g1_i13	http://www.kegg.jp/kegg-bin/show_pathway?ko05140	10
ko04668	TNF signaling pathway	5/926	52/25278	0.0411263	0.14994	TRINITY_DN72538_c0_g1_i2;TRINITY_DN73594_c1_g1_i2;TRINITY_DN73594_c1_g4_i1;TRINITY_DN80140_c0_g5_i1;TRINITY_DN89942_c1_g3_i1	http://www.kegg.jp/kegg-bin/show_pathway?ko04668	5
ko05218	Melanoma	5/926	52/25278	0.0411263	0.14994	TRINITY_DN72538_c0_g1_i2;TRINITY_DN73594_c1_g1_i2;TRINITY_DN73594_c1_g4_i1;TRINITY_DN80140_c0_g5_i1;TRINITY_DN89942_c1_g3_i1	http://www.kegg.jp/kegg-bin/show_pathway?ko05218	5
ko05220	Chronic myeloid leukemia	5/926	53/25278	0.0440962	0.158872	TRINITY_DN72538_c0_g1_i2;TRINITY_DN73594_c1_g1_i2;TRINITY_DN73594_c1_g4_i1;TRINITY_DN80140_c0_g5_i1;TRINITY_DN89942_c1_g3_i1	http://www.kegg.jp/kegg-bin/show_pathway?ko05220	5
ko04916	Melanogenesis	7/926	89/25278	0.0448278	0.158872	TRINITY_DN70077_c0_g1_i2;TRINITY_DN70584_c0_g1_i5;TRINITY_DN72538_c0_g1_i2;TRINITY_DN73594_c1_g1_i2;TRINITY_DN73594_c1_g4_i1;TRINITY_DN80140_c0_g5_i1;TRINITY_DN89942_c1_g3_i1	http://www.kegg.jp/kegg-bin/show_pathway?ko04916	7
ko00627	Aminobenzoate degradation	3/926	22/25278	0.0449381	0.158872	TRINITY_DN74358_c9_g6_i1;TRINITY_DN80141_c3_g2_i1;TRINITY_DN91188_c0_g1_i5	http://www.kegg.jp/kegg-bin/show_pathway?ko00627	3
ko04919	Thyroid hormone signaling pathway	11/926	168/25278	0.0455129	0.159295	TRINITY_DN66491_c1_g2_i4;TRINITY_DN70584_c0_g1_i5;TRINITY_DN72538_c0_g1_i2;TRINITY_DN73594_c1_g1_i2;TRINITY_DN73594_c1_g4_i1;TRINITY_DN78194_c2_g2_i3;TRINITY_DN80140_c0_g5_i1;TRINITY_DN85212_c1_g1_i1;TRINITY_DN89454_c0_g4_i4;TRINITY_DN89942_c1_g3_i1;TRINITY_DN91952_c0_g1_i4	http://www.kegg.jp/kegg-bin/show_pathway?ko04919	11
ko04024	cAMP signaling pathway	11/926	170/25278	0.0488207	0.169181	TRINITY_DN70077_c0_g1_i2;TRINITY_DN70584_c0_g1_i5;TRINITY_DN72538_c0_g1_i2;TRINITY_DN73594_c1_g1_i2;TRINITY_DN73594_c1_g4_i1;TRINITY_DN80140_c0_g5_i1;TRINITY_DN87734_c1_g1_i1;TRINITY_DN87734_c1_g6_i1;TRINITY_DN87734_c1_g5_i4;TRINITY_DN89942_c1_g3_i1;TRINITY_DN95411_c1_g1_i2	http://www.kegg.jp/kegg-bin/show_pathway?ko04024	11
ko04810	Regulation of actin cytoskeleton	10/926	152/25278	0.053397	0.183225	TRINITY_DN69624_c0_g1_i3;TRINITY_DN71607_c0_g4_i1;TRINITY_DN71607_c0_g1_i7;TRINITY_DN72538_c0_g1_i2;TRINITY_DN73594_c1_g1_i2;TRINITY_DN73594_c1_g4_i1;TRINITY_DN80140_c0_g5_i1;TRINITY_DN89942_c1_g3_i1;TRINITY_DN93149_c1_g1_i14;TRINITY_DN95483_c2_g1_i3	http://www.kegg.jp/kegg-bin/show_pathway?ko04810	10
ko04075	Plant hormone signal transduction	22/926	417/25278	0.0567449	0.192822	TRINITY_DN11323_c0_g1_i2;TRINITY_DN54593_c0_g1_i3;TRINITY_DN62316_c0_g1_i1;TRINITY_DN64005_c0_g1_i1;TRINITY_DN69223_c0_g1_i2;TRINITY_DN70157_c0_g1_i1;TRINITY_DN71587_c0_g2_i3;TRINITY_DN72789_c0_g1_i2;TRINITY_DN75179_c0_g3_i8;TRINITY_DN75179_c0_g4_i6;TRINITY_DN76261_c0_g2_i1;TRINITY_DN76823_c0_g4_i2;TRINITY_DN76823_c0_g2_i2;TRINITY_DN80850_c0_g1_i6;TRINITY_DN81327_c0_g2_i2;TRINITY_DN81443_c1_g2_i6…	http://www.kegg.jp/kegg-bin/show_pathway?ko04075	22
ko04510	Focal adhesion	7/926	95/25278	0.0598416	0.20139	TRINITY_DN65260_c1_g1_i1;TRINITY_DN72538_c0_g1_i2;TRINITY_DN73594_c1_g1_i2;TRINITY_DN73594_c1_g4_i1;TRINITY_DN78194_c2_g2_i3;TRINITY_DN80140_c0_g5_i1;TRINITY_DN89942_c1_g3_i1	http://www.kegg.jp/kegg-bin/show_pathway?ko04510	7
ko00500	Starch and sucrose metabolism	24/926	467/25278	0.0613945	0.204648	TRINITY_DN42865_c0_g1_i2;TRINITY_DN74322_c3_g4_i1;TRINITY_DN75840_c0_g1_i1;TRINITY_DN75840_c0_g2_i5;TRINITY_DN76080_c1_g1_i2;TRINITY_DN80088_c0_g1_i5;TRINITY_DN82953_c1_g1_i7;TRINITY_DN84020_c3_g3_i4;TRINITY_DN85163_c2_g1_i3;TRINITY_DN85163_c2_g2_i5;TRINITY_DN85672_c0_g2_i7;TRINITY_DN87356_c1_g1_i4;TRINITY_DN88897_c1_g2_i2;TRINITY_DN89412_c1_g1_i2;TRINITY_DN89902_c1_g1_i7;TRINITY_DN89942_c0_g1_i1…	http://www.kegg.jp/kegg-bin/show_pathway?ko00500	24
ko05145	Toxoplasmosis	15/926	265/25278	0.0644278	0.212733	TRINITY_DN65260_c1_g1_i1;TRINITY_DN72538_c0_g1_i2;TRINITY_DN73495_c1_g2_i3;TRINITY_DN74411_c0_g4_i1;TRINITY_DN74411_c1_g1_i1;TRINITY_DN75969_c0_g1_i3;TRINITY_DN78194_c2_g2_i3;TRINITY_DN79343_c0_g1_i2;TRINITY_DN79547_c2_g1_i2;TRINITY_DN80140_c0_g5_i1;TRINITY_DN84779_c0_g2_i2;TRINITY_DN87852_c0_g8_i2;TRINITY_DN89942_c1_g3_i1;TRINITY_DN93709_c2_g2_i1;TRINITY_DN94852_c2_g1_i13	http://www.kegg.jp/kegg-bin/show_pathway?ko05145	15
ko04512	ECM-receptor interaction	1/926	2/25278	0.0719247	0.233362	TRINITY_DN65260_c1_g1_i1	http://www.kegg.jp/kegg-bin/show_pathway?ko04512	1
ko05418	Fluid shear stress and atherosclerosis	18/926	337/25278	0.0720089	0.233362	TRINITY_DN70077_c0_g1_i2;TRINITY_DN72144_c3_g1_i1;TRINITY_DN74802_c4_g3_i1;TRINITY_DN76659_c4_g1_i1;TRINITY_DN76967_c1_g5_i1;TRINITY_DN78742_c2_g2_i1;TRINITY_DN81698_c0_g5_i4;TRINITY_DN81757_c2_g1_i6;TRINITY_DN82498_c0_g4_i1;TRINITY_DN82498_c0_g2_i4;TRINITY_DN82498_c1_g1_i6;TRINITY_DN82498_c1_g5_i1;TRINITY_DN82498_c1_g9_i1;TRINITY_DN89925_c1_g2_i4;TRINITY_DN92298_c1_g5_i1;TRINITY_DN94609_c0_g1_i7…	http://www.kegg.jp/kegg-bin/show_pathway?ko05418	18
ko05214	Glioma	6/926	80/25278	0.0730487	0.23456	TRINITY_DN70077_c0_g1_i2;TRINITY_DN72538_c0_g1_i2;TRINITY_DN73594_c1_g1_i2;TRINITY_DN73594_c1_g4_i1;TRINITY_DN80140_c0_g5_i1;TRINITY_DN89942_c1_g3_i1	http://www.kegg.jp/kegg-bin/show_pathway?ko05214	6
ko05132	Salmonella infection	6/926	81/25278	0.0765778	0.243657	TRINITY_DN69624_c0_g1_i3;TRINITY_DN72538_c0_g1_i2;TRINITY_DN72550_c0_g4_i1;TRINITY_DN72550_c0_g1_i13;TRINITY_DN80140_c0_g5_i1;TRINITY_DN89942_c1_g3_i1	http://www.kegg.jp/kegg-bin/show_pathway?ko05132	6
ko01524	Platinum drug resistance	12/926	209/25278	0.0839355	0.264662	TRINITY_DN72144_c3_g1_i1;TRINITY_DN72538_c0_g1_i2;TRINITY_DN76456_c1_g10_i1;TRINITY_DN76967_c1_g5_i1;TRINITY_DN78194_c2_g2_i3;TRINITY_DN80140_c0_g5_i1;TRINITY_DN81698_c0_g5_i4;TRINITY_DN89549_c0_g1_i12;TRINITY_DN89942_c1_g3_i1;TRINITY_DN89925_c1_g2_i4;TRINITY_DN94609_c0_g1_i7;TRINITY_DN114980_c0_g1_i1	http://www.kegg.jp/kegg-bin/show_pathway?ko01524	12
ko04626	Plant-pathogen interaction	25/926	509/25278	0.0856553	0.267673	TRINITY_DN50025_c0_g1_i1;TRINITY_DN60713_c0_g1_i1;TRINITY_DN65365_c0_g1_i1;TRINITY_DN66647_c0_g1_i1;TRINITY_DN70077_c0_g1_i2;TRINITY_DN73484_c2_g1_i1;TRINITY_DN73594_c1_g1_i2;TRINITY_DN73594_c1_g4_i1;TRINITY_DN75702_c2_g1_i1;TRINITY_DN78058_c1_g2_i3;TRINITY_DN78372_c0_g7_i1;TRINITY_DN79172_c3_g3_i4;TRINITY_DN79602_c0_g10_i3;TRINITY_DN79576_c0_g1_i6;TRINITY_DN80201_c1_g6_i3;TRINITY_DN81627_c1_g2_i…	http://www.kegg.jp/kegg-bin/show_pathway?ko04626	25
ko04933	AGE-RAGE signaling pathway in diabetic complications	4/926	46/25278	0.0871281	0.269866	TRINITY_DN72538_c0_g1_i2;TRINITY_DN80140_c0_g5_i1;TRINITY_DN85212_c1_g1_i1;TRINITY_DN89942_c1_g3_i1	http://www.kegg.jp/kegg-bin/show_pathway?ko04933	4
ko00531	Glycosaminoglycan degradation	3/926	29/25278	0.0885418	0.270006	TRINITY_DN68994_c0_g1_i2;TRINITY_DN76155_c1_g4_i2;TRINITY_DN76155_c1_g2_i17	http://www.kegg.jp/kegg-bin/show_pathway?ko00531	3
ko02010	ABC transporters	17/926	324/25278	0.0889614	0.270006	TRINITY_DN70952_c0_g2_i3;TRINITY_DN72706_c0_g1_i3;TRINITY_DN72850_c4_g2_i16;TRINITY_DN73980_c1_g6_i1;TRINITY_DN76359_c8_g1_i1;TRINITY_DN84140_c0_g5_i1;TRINITY_DN84214_c0_g1_i5;TRINITY_DN84529_c2_g2_i5;TRINITY_DN89911_c1_g7_i1;TRINITY_DN90446_c3_g4_i1;TRINITY_DN90446_c3_g1_i10;TRINITY_DN92713_c1_g3_i1;TRINITY_DN92713_c1_g5_i1;TRINITY_DN97085_c2_g1_i2;TRINITY_DN97085_c3_g9_i1;TRINITY_DN97343_c0_g1_…	http://www.kegg.jp/kegg-bin/show_pathway?ko02010	17
ko04650	Natural killer cell mediated cytotoxicity	5/926	65/25278	0.0894876	0.270006	TRINITY_DN72538_c0_g1_i2;TRINITY_DN73594_c1_g1_i2;TRINITY_DN73594_c1_g4_i1;TRINITY_DN80140_c0_g5_i1;TRINITY_DN89942_c1_g3_i1	http://www.kegg.jp/kegg-bin/show_pathway?ko04650	5
ko00562	Inositol phosphate metabolism	9/926	147/25278	0.091594	0.2736	TRINITY_DN66491_c1_g2_i4;TRINITY_DN83873_c5_g6_i1;TRINITY_DN84005_c0_g1_i6;TRINITY_DN85212_c1_g1_i1;TRINITY_DN87439_c3_g1_i4;TRINITY_DN89454_c0_g4_i4;TRINITY_DN89816_c0_g1_i5;TRINITY_DN91952_c0_g1_i4;TRINITY_DN93149_c1_g1_i14	http://www.kegg.jp/kegg-bin/show_pathway?ko00562	9
ko04614	Renin-angiotensin system	4/926	47/25278	0.0926165	0.2736	TRINITY_DN73011_c0_g1_i10;TRINITY_DN76002_c0_g1_i1;TRINITY_DN78723_c0_g1_i7;TRINITY_DN89863_c1_g5_i2	http://www.kegg.jp/kegg-bin/show_pathway?ko04614	4
ko04014	Ras signaling pathway	10/926	169/25278	0.0930241	0.2736	TRINITY_DN70077_c0_g1_i2;TRINITY_DN72538_c0_g1_i2;TRINITY_DN73594_c1_g1_i2;TRINITY_DN73594_c1_g4_i1;TRINITY_DN80140_c0_g5_i1;TRINITY_DN87734_c1_g1_i1;TRINITY_DN87734_c1_g6_i1;TRINITY_DN87734_c1_g5_i4;TRINITY_DN89942_c1_g3_i1;TRINITY_DN95411_c1_g1_i2	http://www.kegg.jp/kegg-bin/show_pathway?ko04014	10
ko04015	Rap1 signaling pathway	6/926	86/25278	0.0956364	0.274908	TRINITY_DN70077_c0_g1_i2;TRINITY_DN72538_c0_g1_i2;TRINITY_DN73594_c1_g1_i2;TRINITY_DN73594_c1_g4_i1;TRINITY_DN80140_c0_g5_i1;TRINITY_DN89942_c1_g3_i1	http://www.kegg.jp/kegg-bin/show_pathway?ko04015	6
ko04270	Vascular smooth muscle contraction	6/926	86/25278	0.0956364	0.274908	TRINITY_DN70077_c0_g1_i2;TRINITY_DN72538_c0_g1_i2;TRINITY_DN73594_c1_g1_i2;TRINITY_DN73594_c1_g4_i1;TRINITY_DN80140_c0_g5_i1;TRINITY_DN89942_c1_g3_i1	http://www.kegg.jp/kegg-bin/show_pathway?ko04270	6
ko00643	Styrene degradation	3/926	30/25278	0.0958249	0.274908	TRINITY_DN74358_c9_g6_i1;TRINITY_DN80141_c3_g2_i1;TRINITY_DN91188_c0_g1_i5	http://www.kegg.jp/kegg-bin/show_pathway?ko00643	3
ko04062	Chemokine signaling pathway	5/926	67/25278	0.0987633	0.278767	TRINITY_DN72538_c0_g1_i2;TRINITY_DN73594_c1_g1_i2;TRINITY_DN73594_c1_g4_i1;TRINITY_DN80140_c0_g5_i1;TRINITY_DN89942_c1_g3_i1	http://www.kegg.jp/kegg-bin/show_pathway?ko04062	5
ko04730	Long-term depression	5/926	67/25278	0.0987633	0.278767	TRINITY_DN72538_c0_g1_i2;TRINITY_DN73594_c1_g1_i2;TRINITY_DN73594_c1_g4_i1;TRINITY_DN80140_c0_g5_i1;TRINITY_DN89942_c1_g3_i1	http://www.kegg.jp/kegg-bin/show_pathway?ko04730	5
ko05211	Renal cell carcinoma	6/926	89/25278	0.108178	0.301994	TRINITY_DN70584_c0_g1_i5;TRINITY_DN72538_c0_g1_i2;TRINITY_DN73594_c1_g1_i2;TRINITY_DN73594_c1_g4_i1;TRINITY_DN80140_c0_g5_i1;TRINITY_DN89942_c1_g3_i1	http://www.kegg.jp/kegg-bin/show_pathway?ko05211	6
ko00982	Drug metabolism - cytochrome P450	8/926	131/25278	0.108718	0.301994	TRINITY_DN70917_c0_g1_i3;TRINITY_DN72144_c3_g1_i1;TRINITY_DN76967_c1_g5_i1;TRINITY_DN81698_c0_g5_i4;TRINITY_DN89925_c1_g2_i4;TRINITY_DN93289_c0_g2_i1;TRINITY_DN94609_c0_g1_i7;TRINITY_DN114980_c0_g1_i1	http://www.kegg.jp/kegg-bin/show_pathway?ko00982	8
ko04540	Gap junction	7/926	112/25278	0.117293	0.3205	TRINITY_DN72538_c0_g1_i2;TRINITY_DN73594_c1_g1_i2;TRINITY_DN73594_c1_g4_i1;TRINITY_DN77266_c0_g5_i1;TRINITY_DN80140_c0_g5_i1;TRINITY_DN84921_c1_g1_i2;TRINITY_DN89942_c1_g3_i1	http://www.kegg.jp/kegg-bin/show_pathway?ko04540	7
ko00062	Fatty acid elongation	5/926	71/25278	0.118689	0.3205	TRINITY_DN68782_c0_g1_i1;TRINITY_DN73033_c0_g3_i1;TRINITY_DN83574_c5_g1_i4;TRINITY_DN88085_c0_g2_i1;TRINITY_DN88303_c2_g6_i13	http://www.kegg.jp/kegg-bin/show_pathway?ko00062	5
ko05146	Amoebiasis	3/926	33/25278	0.119043	0.3205	TRINITY_DN65260_c1_g1_i1;TRINITY_DN72550_c0_g4_i1;TRINITY_DN72550_c0_g1_i13	http://www.kegg.jp/kegg-bin/show_pathway?ko05146	3
ko04973	Carbohydrate digestion and absorption	3/926	33/25278	0.119043	0.3205	TRINITY_DN42865_c0_g1_i2;TRINITY_DN82953_c1_g1_i7;TRINITY_DN94133_c0_g1_i8	http://www.kegg.jp/kegg-bin/show_pathway?ko04973	3
ko04720	Long-term potentiation	7/926	113/25278	0.121343	0.321339	TRINITY_DN70077_c0_g1_i2;TRINITY_DN70584_c0_g1_i5;TRINITY_DN72538_c0_g1_i2;TRINITY_DN73594_c1_g1_i2;TRINITY_DN73594_c1_g4_i1;TRINITY_DN80140_c0_g5_i1;TRINITY_DN89942_c1_g3_i1	http://www.kegg.jp/kegg-bin/show_pathway?ko04720	7
ko00052	Galactose metabolism	12/926	224/25278	0.1223	0.321339	TRINITY_DN79544_c0_g4_i1;TRINITY_DN79544_c0_g1_i14;TRINITY_DN79544_c0_g6_i2;TRINITY_DN84158_c2_g2_i9;TRINITY_DN86638_c3_g4_i2;TRINITY_DN86638_c3_g7_i1;TRINITY_DN87344_c0_g3_i4;TRINITY_DN87344_c0_g1_i2;TRINITY_DN87344_c1_g2_i1;TRINITY_DN89412_c1_g1_i2;TRINITY_DN93236_c0_g5_i1;TRINITY_DN93786_c0_g2_i1	http://www.kegg.jp/kegg-bin/show_pathway?ko00052	12
ko04713	Circadian entrainment	4/926	52/25278	0.122384	0.321339	TRINITY_DN70077_c0_g1_i2;TRINITY_DN72538_c0_g1_i2;TRINITY_DN80140_c0_g5_i1;TRINITY_DN89942_c1_g3_i1	http://www.kegg.jp/kegg-bin/show_pathway?ko04713	4
ko04662	B cell receptor signaling pathway	5/926	72/25278	0.123945	0.321339	TRINITY_DN72538_c0_g1_i2;TRINITY_DN73594_c1_g1_i2;TRINITY_DN73594_c1_g4_i1;TRINITY_DN80140_c0_g5_i1;TRINITY_DN89942_c1_g3_i1	http://www.kegg.jp/kegg-bin/show_pathway?ko04662	5
ko04370	VEGF signaling pathway	5/926	72/25278	0.123945	0.321339	TRINITY_DN72538_c0_g1_i2;TRINITY_DN73594_c1_g1_i2;TRINITY_DN73594_c1_g4_i1;TRINITY_DN80140_c0_g5_i1;TRINITY_DN89942_c1_g3_i1	http://www.kegg.jp/kegg-bin/show_pathway?ko04370	5
ko04712	Circadian rhythm - plant	6/926	93/25278	0.126139	0.324623	TRINITY_DN71013_c0_g3_i2;TRINITY_DN77590_c0_g5_i1;TRINITY_DN77590_c0_g8_i1;TRINITY_DN92389_c3_g2_i2;TRINITY_DN94747_c0_g5_i1;TRINITY_DN96704_c2_g1_i1	http://www.kegg.jp/kegg-bin/show_pathway?ko04712	6
ko04624	Toll and Imd signaling pathway	9/926	160/25278	0.134137	0.341203	TRINITY_DN73495_c1_g2_i3;TRINITY_DN75969_c0_g1_i3;TRINITY_DN79547_c2_g1_i2;TRINITY_DN80224_c0_g2_i1;TRINITY_DN83760_c0_g2_i3;TRINITY_DN84779_c0_g2_i2;TRINITY_DN87852_c0_g8_i2;TRINITY_DN93709_c2_g2_i1;TRINITY_DN94852_c2_g1_i13	http://www.kegg.jp/kegg-bin/show_pathway?ko04624	9
ko05165	Human papillomavirus infection	15/926	298/25278	0.134531	0.341203	TRINITY_DN65260_c1_g1_i1;TRINITY_DN70584_c0_g1_i5;TRINITY_DN72538_c0_g1_i2;TRINITY_DN73594_c1_g1_i2;TRINITY_DN73594_c1_g4_i1;TRINITY_DN76984_c3_g1_i3;TRINITY_DN80140_c0_g5_i1;TRINITY_DN84888_c1_g3_i1;TRINITY_DN84888_c1_g4_i1;TRINITY_DN85796_c6_g1_i3;TRINITY_DN86356_c0_g1_i7;TRINITY_DN88705_c1_g2_i5;TRINITY_DN89549_c0_g1_i12;TRINITY_DN89942_c1_g3_i1;TRINITY_DN95323_c0_g7_i2	http://www.kegg.jp/kegg-bin/show_pathway?ko05165	15
ko04064	NF-kappa B signaling pathway	8/926	139/25278	0.138684	0.348017	TRINITY_DN73495_c1_g2_i3;TRINITY_DN75969_c0_g1_i3;TRINITY_DN79547_c2_g1_i2;TRINITY_DN84779_c0_g2_i2;TRINITY_DN87852_c0_g8_i2;TRINITY_DN89549_c0_g1_i12;TRINITY_DN93709_c2_g2_i1;TRINITY_DN94852_c2_g1_i13	http://www.kegg.jp/kegg-bin/show_pathway?ko04064	8
ko01003	Glycosyltransferases	26/926	565/25278	0.139207	0.348017	TRINITY_DN69031_c0_g1_i2;TRINITY_DN71502_c0_g1_i1;TRINITY_DN72697_c2_g2_i1;TRINITY_DN72697_c2_g3_i6;TRINITY_DN72697_c2_g5_i2;TRINITY_DN76080_c1_g1_i2;TRINITY_DN76600_c2_g6_i1;TRINITY_DN77164_c0_g2_i1;TRINITY_DN78731_c0_g2_i3;TRINITY_DN80642_c0_g5_i6;TRINITY_DN81293_c0_g1_i4;TRINITY_DN82472_c1_g2_i1;TRINITY_DN82472_c2_g1_i1;TRINITY_DN83547_c0_g3_i2;TRINITY_DN84020_c3_g3_i4;TRINITY_DN85929_c0_g3_i2…	http://www.kegg.jp/kegg-bin/show_pathway?ko01003	26
ko04360	Axon guidance	5/926	77/25278	0.151768	0.376729	TRINITY_DN71607_c0_g4_i1;TRINITY_DN71607_c0_g1_i7;TRINITY_DN72538_c0_g1_i2;TRINITY_DN80140_c0_g5_i1;TRINITY_DN89942_c1_g3_i1	http://www.kegg.jp/kegg-bin/show_pathway?ko04360	5
ko00900	Terpenoid backbone biosynthesis	8/926	143/25278	0.15507	0.382214	TRINITY_DN69285_c0_g1_i1;TRINITY_DN70368_c0_g1_i2;TRINITY_DN73642_c0_g4_i8;TRINITY_DN75205_c1_g6_i1;TRINITY_DN83688_c3_g2_i2;TRINITY_DN90343_c1_g7_i1;TRINITY_DN91362_c6_g1_i1;TRINITY_DN96523_c2_g3_i1	http://www.kegg.jp/kegg-bin/show_pathway?ko00900	8
ko04040	Ion channels	6/926	100/25278	0.160752	0.393449	TRINITY_DN71903_c4_g2_i12;TRINITY_DN81260_c0_g5_i1;TRINITY_DN81681_c4_g2_i2;TRINITY_DN82643_c1_g9_i1;TRINITY_DN83198_c1_g3_i2;TRINITY_DN91324_c3_g1_i2	http://www.kegg.jp/kegg-bin/show_pathway?ko04040	6
ko04530	Tight junction	12/926	237/25278	0.162355	0.394612	TRINITY_DN74802_c4_g3_i1;TRINITY_DN76659_c4_g1_i1;TRINITY_DN77266_c0_g5_i1;TRINITY_DN78742_c2_g2_i1;TRINITY_DN81757_c2_g1_i6;TRINITY_DN82498_c0_g4_i1;TRINITY_DN82498_c0_g2_i4;TRINITY_DN82498_c1_g1_i6;TRINITY_DN82498_c1_g5_i1;TRINITY_DN82498_c1_g9_i1;TRINITY_DN84444_c1_g2_i12;TRINITY_DN95667_c2_g1_i7	http://www.kegg.jp/kegg-bin/show_pathway?ko04530	12
ko00350	Tyrosine metabolism	6/926	101/25278	0.166003	0.400698	TRINITY_DN65237_c0_g1_i1;TRINITY_DN75256_c0_g2_i1;TRINITY_DN75256_c0_g1_i2;TRINITY_DN84687_c5_g1_i14;TRINITY_DN90408_c0_g6_i1;TRINITY_DN93289_c0_g2_i1	http://www.kegg.jp/kegg-bin/show_pathway?ko00350	6
ko04022	cGMP - PKG signaling pathway	7/926	124/25278	0.170372	0.406401	TRINITY_DN70077_c0_g1_i2;TRINITY_DN71332_c0_g1_i2;TRINITY_DN72538_c0_g1_i2;TRINITY_DN73594_c1_g1_i2;TRINITY_DN73594_c1_g4_i1;TRINITY_DN80140_c0_g5_i1;TRINITY_DN89942_c1_g3_i1	http://www.kegg.jp/kegg-bin/show_pathway?ko04022	7
ko04962	Vasopressin-regulated water reabsorption	3/926	39/25278	0.170689	0.406401	TRINITY_DN68282_c0_g1_i1;TRINITY_DN74832_c0_g1_i2;TRINITY_DN88186_c0_g1_i9	http://www.kegg.jp/kegg-bin/show_pathway?ko04962	3
ko00536	Glycosaminoglycan binding proteins	2/926	21/25278	0.178569	0.422291	TRINITY_DN76155_c1_g4_i2;TRINITY_DN76155_c1_g2_i17	http://www.kegg.jp/kegg-bin/show_pathway?ko00536	2
ko00603	Glycosphingolipid biosynthesis - globo and isoglobo series	4/926	61/25278	0.1844	0.433155	TRINITY_DN77164_c0_g2_i1;TRINITY_DN82472_c1_g2_i1;TRINITY_DN82472_c2_g1_i1;TRINITY_DN93786_c0_g2_i1	http://www.kegg.jp/kegg-bin/show_pathway?ko00603	4
ko04612	Antigen processing and presentation	10/926	197/25278	0.187751	0.438085	TRINITY_DN68539_c0_g1_i1;TRINITY_DN74411_c0_g4_i1;TRINITY_DN74411_c1_g1_i1;TRINITY_DN76176_c0_g1_i5;TRINITY_DN77482_c0_g3_i1;TRINITY_DN79343_c0_g1_i2;TRINITY_DN82396_c7_g1_i4;TRINITY_DN84444_c1_g2_i12;TRINITY_DN97188_c3_g3_i3;TRINITY_DN97188_c3_g6_i1	http://www.kegg.jp/kegg-bin/show_pathway?ko04612	10
ko02042	Bacterial toxins	3/926	41/25278	0.189136	0.438394	TRINITY_DN66491_c1_g2_i4;TRINITY_DN89454_c0_g4_i4;TRINITY_DN91952_c0_g1_i4	http://www.kegg.jp/kegg-bin/show_pathway?ko02042	3
ko04658	Th1 and Th2 cell differentiation	3/926	42/25278	0.198543	0.454225	TRINITY_DN72538_c0_g1_i2;TRINITY_DN80140_c0_g5_i1;TRINITY_DN89942_c1_g3_i1	http://www.kegg.jp/kegg-bin/show_pathway?ko04658	3
ko04625	C-type lectin receptor signaling pathway	4/926	63/25278	0.19938	0.454225	TRINITY_DN70077_c0_g1_i2;TRINITY_DN72538_c0_g1_i2;TRINITY_DN80140_c0_g5_i1;TRINITY_DN89942_c1_g3_i1	http://www.kegg.jp/kegg-bin/show_pathway?ko04625	4
ko05142	Chagas disease (American trypanosomiasis)	10/926	200/25278	0.199859	0.454225	TRINITY_DN72538_c0_g1_i2;TRINITY_DN73495_c1_g2_i3;TRINITY_DN75969_c0_g1_i3;TRINITY_DN79547_c2_g1_i2;TRINITY_DN80140_c0_g5_i1;TRINITY_DN84779_c0_g2_i2;TRINITY_DN87852_c0_g8_i2;TRINITY_DN89942_c1_g3_i1;TRINITY_DN93709_c2_g2_i1;TRINITY_DN94852_c2_g1_i13	http://www.kegg.jp/kegg-bin/show_pathway?ko05142	10
ko00532	Glycosaminoglycan biosynthesis - chondroitin sulfate / dermatan sulfate	2/926	23/25278	0.205419	0.463849	TRINITY_DN85929_c0_g3_i2;TRINITY_DN91044_c0_g6_i1	http://www.kegg.jp/kegg-bin/show_pathway?ko00532	2
ko04520	Adherens junction	5/926	86/25278	0.207507	0.465561	TRINITY_DN70584_c0_g1_i5;TRINITY_DN72538_c0_g1_i2;TRINITY_DN80140_c0_g5_i1;TRINITY_DN89753_c1_g1_i6;TRINITY_DN89942_c1_g3_i1	http://www.kegg.jp/kegg-bin/show_pathway?ko04520	5
ko05215	Prostate cancer	8/926	156/25278	0.214058	0.4772	TRINITY_DN70584_c0_g1_i5;TRINITY_DN72538_c0_g1_i2;TRINITY_DN73594_c1_g1_i2;TRINITY_DN73594_c1_g4_i1;TRINITY_DN78194_c2_g2_i3;TRINITY_DN80140_c0_g5_i1;TRINITY_DN89942_c1_g3_i1;TRINITY_DN92298_c1_g5_i1	http://www.kegg.jp/kegg-bin/show_pathway?ko05215	8
ko00904	Diterpenoid biosynthesis	2/926	24/25278	0.219003	0.48368	TRINITY_DN71536_c0_g1_i2;TRINITY_DN71536_c0_g2_i4	http://www.kegg.jp/kegg-bin/show_pathway?ko00904	2
ko05164	Influenza A	11/926	229/25278	0.220384	0.48368	TRINITY_DN68964_c0_g1_i1;TRINITY_DN70584_c0_g1_i5;TRINITY_DN72538_c0_g1_i2;TRINITY_DN73594_c1_g1_i2;TRINITY_DN73594_c1_g4_i1;TRINITY_DN74411_c0_g4_i1;TRINITY_DN74411_c1_g1_i1;TRINITY_DN79343_c0_g1_i2;TRINITY_DN80140_c0_g5_i1;TRINITY_DN88705_c1_g2_i5;TRINITY_DN89942_c1_g3_i1	http://www.kegg.jp/kegg-bin/show_pathway?ko05164	11
ko04070	Phosphatidylinositol signaling system	7/926	134/25278	0.221204	0.48368	TRINITY_DN70077_c0_g1_i2;TRINITY_DN83873_c5_g6_i1;TRINITY_DN84005_c0_g1_i6;TRINITY_DN85212_c1_g1_i1;TRINITY_DN87439_c3_g1_i4;TRINITY_DN89816_c0_g1_i5;TRINITY_DN93149_c1_g1_i14	http://www.kegg.jp/kegg-bin/show_pathway?ko04070	7
ko04341	Hedgehog signaling pathway - fly	4/926	66/25278	0.222493	0.48368	TRINITY_DN76437_c5_g2_i1;TRINITY_DN77139_c0_g2_i1;TRINITY_DN77139_c0_g3_i1;TRINITY_DN88013_c3_g8_i1	http://www.kegg.jp/kegg-bin/show_pathway?ko04341	4
ko04918	Thyroid hormone synthesis	5/926	89/25278	0.227415	0.491329	TRINITY_DN48969_c0_g1_i1;TRINITY_DN77439_c6_g1_i1;TRINITY_DN79352_c2_g5_i3;TRINITY_DN90238_c5_g3_i3;TRINITY_DN92298_c1_g5_i1	http://www.kegg.jp/kegg-bin/show_pathway?ko04918	5
ko04013	MAPK signaling pathway - fly	7/926	136/25278	0.231965	0.495704	TRINITY_DN72538_c0_g1_i2;TRINITY_DN73594_c1_g1_i2;TRINITY_DN73594_c1_g4_i1;TRINITY_DN80140_c0_g5_i1;TRINITY_DN81375_c4_g1_i1;TRINITY_DN83760_c0_g2_i3;TRINITY_DN89942_c1_g3_i1	http://www.kegg.jp/kegg-bin/show_pathway?ko04013	7
ko00534	Glycosaminoglycan biosynthesis - heparan sulfate / heparin	2/926	25/25278	0.23266	0.495704	TRINITY_DN85929_c0_g3_i2;TRINITY_DN91044_c0_g6_i1	http://www.kegg.jp/kegg-bin/show_pathway?ko00534	2
ko04071	Sphingolipid signaling pathway	10/926	208/25278	0.233689	0.495704	TRINITY_DN72538_c0_g1_i2;TRINITY_DN73594_c1_g1_i2;TRINITY_DN73594_c1_g4_i1;TRINITY_DN78194_c2_g2_i3;TRINITY_DN80140_c0_g5_i1;TRINITY_DN87734_c1_g1_i1;TRINITY_DN87734_c1_g6_i1;TRINITY_DN87734_c1_g5_i4;TRINITY_DN89942_c1_g3_i1;TRINITY_DN95411_c1_g1_i2	http://www.kegg.jp/kegg-bin/show_pathway?ko04071	10
ko04212	Longevity regulating pathway - worm	9/926	185/25278	0.238837	0.503572	TRINITY_DN56019_c1_g1_i1;TRINITY_DN84888_c1_g3_i1;TRINITY_DN84888_c1_g4_i1;TRINITY_DN85796_c6_g1_i3;TRINITY_DN86356_c0_g1_i7;TRINITY_DN90204_c2_g3_i5;TRINITY_DN91696_c0_g2_i1;TRINITY_DN93828_c1_g7_i1;TRINITY_DN95323_c0_g7_i2	http://www.kegg.jp/kegg-bin/show_pathway?ko04212	9
ko05323	Rheumatoid arthritis	4/926	69/25278	0.246258	0.514373	TRINITY_DN86234_c0_g1_i2;TRINITY_DN90944_c2_g1_i7;TRINITY_DN91933_c2_g1_i1;TRINITY_DN91933_c2_g2_i3	http://www.kegg.jp/kegg-bin/show_pathway?ko05323	4
ko04915	Estrogen signaling pathway	10/926	211/25278	0.246899	0.514373	TRINITY_DN70077_c0_g1_i2;TRINITY_DN72538_c0_g1_i2;TRINITY_DN73594_c1_g1_i2;TRINITY_DN73594_c1_g4_i1;TRINITY_DN74411_c0_g4_i1;TRINITY_DN74411_c1_g1_i1;TRINITY_DN79343_c0_g1_i2;TRINITY_DN80140_c0_g5_i1;TRINITY_DN89942_c1_g3_i1;TRINITY_DN92298_c1_g5_i1	http://www.kegg.jp/kegg-bin/show_pathway?ko04915	10
ko04922	Glucagon signaling pathway	13/926	286/25278	0.251771	0.52142	TRINITY_DN70077_c0_g1_i2;TRINITY_DN70584_c0_g1_i5;TRINITY_DN74802_c4_g3_i1;TRINITY_DN76659_c4_g1_i1;TRINITY_DN76984_c3_g1_i3;TRINITY_DN78742_c2_g2_i1;TRINITY_DN81757_c2_g1_i6;TRINITY_DN82498_c0_g4_i1;TRINITY_DN82498_c0_g2_i4;TRINITY_DN82498_c1_g1_i6;TRINITY_DN82498_c1_g5_i1;TRINITY_DN82498_c1_g9_i1;TRINITY_DN95667_c2_g1_i7	http://www.kegg.jp/kegg-bin/show_pathway?ko04922	13
ko05033	Nicotine addiction	1/926	8/25278	0.258148	0.528374	TRINITY_DN79988_c4_g1_i2	http://www.kegg.jp/kegg-bin/show_pathway?ko05033	1
ko00281	Geraniol degradation	1/926	8/25278	0.258148	0.528374	TRINITY_DN67334_c0_g3_i3	http://www.kegg.jp/kegg-bin/show_pathway?ko00281	1
ko04218	Cellular senescence	10/926	215/25278	0.264905	0.539051	TRINITY_DN70077_c0_g1_i2;TRINITY_DN71261_c4_g2_i1;TRINITY_DN71332_c0_g1_i2;TRINITY_DN72538_c0_g1_i2;TRINITY_DN73594_c1_g1_i2;TRINITY_DN73594_c1_g4_i1;TRINITY_DN80140_c0_g5_i1;TRINITY_DN89549_c0_g1_i12;TRINITY_DN89942_c1_g3_i1;TRINITY_DN94218_c4_g1_i1	http://www.kegg.jp/kegg-bin/show_pathway?ko04218	10
ko04114	Oocyte meiosis	12/926	265/25278	0.267036	0.540247	TRINITY_DN70077_c0_g1_i2;TRINITY_DN72538_c0_g1_i2;TRINITY_DN73594_c1_g1_i2;TRINITY_DN73594_c1_g4_i1;TRINITY_DN76437_c5_g2_i1;TRINITY_DN77139_c0_g2_i1;TRINITY_DN77139_c0_g3_i1;TRINITY_DN80140_c0_g5_i1;TRINITY_DN88013_c3_g8_i1;TRINITY_DN89942_c1_g3_i1;TRINITY_DN90636_c0_g1_i7;TRINITY_DN94218_c4_g1_i1	http://www.kegg.jp/kegg-bin/show_pathway?ko04114	12
ko04516	Cell adhesion molecules and their ligands	4/926	72/25278	0.270542	0.544194	TRINITY_DN65260_c1_g1_i1;TRINITY_DN74411_c0_g4_i1;TRINITY_DN74411_c1_g1_i1;TRINITY_DN79343_c0_g1_i2	http://www.kegg.jp/kegg-bin/show_pathway?ko04516	4
ko05167	Kaposi's sarcoma-associated herpesvirus infection	7/926	144/25278	0.276598	0.553195	TRINITY_DN70077_c0_g1_i2;TRINITY_DN70584_c0_g1_i5;TRINITY_DN72538_c0_g1_i2;TRINITY_DN73594_c1_g1_i2;TRINITY_DN73594_c1_g4_i1;TRINITY_DN80140_c0_g5_i1;TRINITY_DN89942_c1_g3_i1	http://www.kegg.jp/kegg-bin/show_pathway?ko05167	7
ko04932	Non-alcoholic fatty liver disease (NAFLD)	11/926	243/25278	0.279333	0.555492	TRINITY_DN70222_c0_g3_i2;TRINITY_DN74802_c4_g3_i1;TRINITY_DN76659_c4_g1_i1;TRINITY_DN78742_c2_g2_i1;TRINITY_DN81757_c2_g1_i6;TRINITY_DN82498_c0_g4_i1;TRINITY_DN82498_c0_g2_i4;TRINITY_DN82498_c1_g1_i6;TRINITY_DN82498_c1_g5_i1;TRINITY_DN82498_c1_g9_i1;TRINITY_DN95667_c2_g1_i7	http://www.kegg.jp/kegg-bin/show_pathway?ko04932	11
ko04131	Membrane trafficking	61/926	1543/25278	0.284655	0.562877	TRINITY_DN48969_c0_g1_i1;TRINITY_DN68282_c0_g1_i1;TRINITY_DN69624_c0_g1_i3;TRINITY_DN70077_c0_g1_i2;TRINITY_DN71323_c1_g3_i5;TRINITY_DN71607_c0_g4_i1;TRINITY_DN71607_c0_g1_i7;TRINITY_DN71792_c0_g4_i1;TRINITY_DN72549_c0_g1_i1;TRINITY_DN72550_c0_g4_i1;TRINITY_DN72550_c0_g1_i13;TRINITY_DN72825_c0_g2_i1;TRINITY_DN73631_c1_g2_i1;TRINITY_DN74045_c1_g3_i1;TRINITY_DN74411_c0_g4_i1;TRINITY_DN74411_c1_g1_i…	http://www.kegg.jp/kegg-bin/show_pathway?ko04131	61
ko04146	Peroxisome	10/926	221/25278	0.292653	0.575441	TRINITY_DN56019_c1_g1_i1;TRINITY_DN67334_c0_g3_i3;TRINITY_DN74166_c5_g1_i4;TRINITY_DN77283_c0_g1_i4;TRINITY_DN77283_c0_g5_i1;TRINITY_DN78078_c0_g1_i1;TRINITY_DN79690_c2_g2_i8;TRINITY_DN87264_c1_g5_i1;TRINITY_DN90204_c2_g3_i5;TRINITY_DN91696_c0_g2_i1	http://www.kegg.jp/kegg-bin/show_pathway?ko04146	10
ko05131	Shigellosis	4/926	75/25278	0.295216	0.577237	TRINITY_DN69624_c0_g1_i3;TRINITY_DN72538_c0_g1_i2;TRINITY_DN80140_c0_g5_i1;TRINITY_DN89942_c1_g3_i1	http://www.kegg.jp/kegg-bin/show_pathway?ko05131	4
ko04016	MAPK signaling pathway - plant	12/926	273/25278	0.300499	0.582537	TRINITY_DN65365_c0_g1_i1;TRINITY_DN70077_c0_g1_i2;TRINITY_DN76456_c1_g10_i1;TRINITY_DN79172_c3_g3_i4;TRINITY_DN81443_c1_g2_i6;TRINITY_DN81627_c1_g2_i1;TRINITY_DN81627_c2_g1_i12;TRINITY_DN81627_c2_g2_i2;TRINITY_DN89398_c0_g11_i1;TRINITY_DN90204_c2_g3_i5;TRINITY_DN91785_c1_g8_i3;TRINITY_DN93934_c2_g2_i1	http://www.kegg.jp/kegg-bin/show_pathway?ko04016	12
ko04925	Aldosterone synthesis and secretion	2/926	30/25278	0.301255	0.582537	TRINITY_DN70077_c0_g1_i2;TRINITY_DN81223_c1_g2_i2	http://www.kegg.jp/kegg-bin/show_pathway?ko04925	2
ko05032	Morphine addiction	1/926	10/25278	0.311522	0.599081	TRINITY_DN79988_c4_g1_i2	http://www.kegg.jp/kegg-bin/show_pathway?ko05032	1
ko00944	Flavone and flavonol biosynthesis	2/926	31/25278	0.314904	0.602275	TRINITY_DN47199_c0_g1_i1;TRINITY_DN68994_c0_g1_i2	http://www.kegg.jp/kegg-bin/show_pathway?ko00944	2
ko05161	Hepatitis B	6/926	127/25278	0.321964	0.612431	TRINITY_DN70584_c0_g1_i5;TRINITY_DN72538_c0_g1_i2;TRINITY_DN73594_c1_g1_i2;TRINITY_DN73594_c1_g4_i1;TRINITY_DN80140_c0_g5_i1;TRINITY_DN89942_c1_g3_i1	http://www.kegg.jp/kegg-bin/show_pathway?ko05161	6
ko00564	Glycerophospholipid metabolism	12/926	279/25278	0.326307	0.616011	TRINITY_DN66491_c1_g2_i4;TRINITY_DN72558_c0_g1_i2;TRINITY_DN77879_c0_g3_i4;TRINITY_DN80339_c0_g1_i6;TRINITY_DN87734_c1_g1_i1;TRINITY_DN87734_c1_g6_i1;TRINITY_DN87734_c1_g5_i4;TRINITY_DN88852_c0_g5_i2;TRINITY_DN89454_c0_g4_i4;TRINITY_DN90771_c0_g1_i1;TRINITY_DN91952_c0_g1_i4;TRINITY_DN95411_c1_g1_i2	http://www.kegg.jp/kegg-bin/show_pathway?ko00564	12
ko04611	Platelet activation	3/926	55/25278	0.327366	0.616011	TRINITY_DN72538_c0_g1_i2;TRINITY_DN80140_c0_g5_i1;TRINITY_DN89942_c1_g3_i1	http://www.kegg.jp/kegg-bin/show_pathway?ko04611	3
ko00592	alpha-Linolenic acid metabolism	8/926	179/25278	0.334133	0.625382	TRINITY_DN77100_c0_g2_i5;TRINITY_DN79690_c2_g2_i8;TRINITY_DN82128_c1_g2_i2;TRINITY_DN88823_c0_g1_i1;TRINITY_DN88823_c0_g3_i1;TRINITY_DN89895_c2_g2_i1;TRINITY_DN89895_c2_g5_i6;TRINITY_DN91576_c1_g3_i4	http://www.kegg.jp/kegg-bin/show_pathway?ko00592	8
ko00471	D-Glutamine and D-glutamate metabolism	1/926	11/25278	0.336753	0.625518	TRINITY_DN87935_c1_g1_i4	http://www.kegg.jp/kegg-bin/show_pathway?ko00471	1
ko05162	Measles	11/926	256/25278	0.33778	0.625518	TRINITY_DN73495_c1_g2_i3;TRINITY_DN74411_c0_g4_i1;TRINITY_DN74411_c1_g1_i1;TRINITY_DN75969_c0_g1_i3;TRINITY_DN79343_c0_g1_i2;TRINITY_DN79547_c2_g1_i2;TRINITY_DN84779_c0_g2_i2;TRINITY_DN87852_c0_g8_i2;TRINITY_DN88705_c1_g2_i5;TRINITY_DN93709_c2_g2_i1;TRINITY_DN94852_c2_g1_i13	http://www.kegg.jp/kegg-bin/show_pathway?ko05162	11
ko04310	Wnt signaling pathway	8/926	180/25278	0.339635	0.625643	TRINITY_DN70584_c0_g1_i5;TRINITY_DN76437_c5_g2_i1;TRINITY_DN77139_c0_g2_i1;TRINITY_DN77139_c0_g3_i1;TRINITY_DN79839_c1_g5_i2;TRINITY_DN81375_c4_g1_i1;TRINITY_DN85627_c1_g1_i2;TRINITY_DN88013_c3_g8_i1	http://www.kegg.jp/kegg-bin/show_pathway?ko04310	8
ko05166	HTLV-I infection	10/926	236/25278	0.364834	0.668544	TRINITY_DN68539_c0_g1_i1;TRINITY_DN70584_c0_g1_i5;TRINITY_DN71332_c0_g1_i2;TRINITY_DN79195_c5_g3_i1;TRINITY_DN80634_c8_g2_i3;TRINITY_DN82396_c7_g1_i4;TRINITY_DN88898_c7_g4_i1;TRINITY_DN89549_c0_g1_i12;TRINITY_DN96539_c1_g10_i1;TRINITY_DN96539_c2_g1_i1	http://www.kegg.jp/kegg-bin/show_pathway?ko05166	10
ko00945	Stilbenoid, diarylheptanoid and gingerol biosynthesis	2/926	35/25278	0.368755	0.67221	TRINITY_DN90401_c1_g2_i3;TRINITY_DN90401_c1_g1_i3	http://www.kegg.jp/kegg-bin/show_pathway?ko00945	2
ko04714	Thermogenesis	19/926	474/25278	0.376717	0.683165	TRINITY_DN74802_c4_g3_i1;TRINITY_DN76659_c4_g1_i1;TRINITY_DN78078_c0_g1_i1;TRINITY_DN78742_c2_g2_i1;TRINITY_DN80567_c0_g6_i1;TRINITY_DN81757_c2_g1_i6;TRINITY_DN82498_c0_g4_i1;TRINITY_DN82498_c0_g2_i4;TRINITY_DN82498_c1_g1_i6;TRINITY_DN82498_c1_g5_i1;TRINITY_DN82498_c1_g9_i1;TRINITY_DN84888_c1_g3_i1;TRINITY_DN84888_c1_g4_i1;TRINITY_DN85796_c6_g1_i3;TRINITY_DN86356_c0_g1_i7;TRINITY_DN87264_c1_g5_i1…	http://www.kegg.jp/kegg-bin/show_pathway?ko04714	19
ko04964	Proximal tubule bicarbonate reclamation	1/926	13/25278	0.384477	0.690088	TRINITY_DN87935_c1_g1_i4	http://www.kegg.jp/kegg-bin/show_pathway?ko04964	1
ko00965	Betalain biosynthesis	1/926	13/25278	0.384477	0.690088	TRINITY_DN65237_c0_g1_i1	http://www.kegg.jp/kegg-bin/show_pathway?ko00965	1
ko00072	Synthesis and degradation of ketone bodies	1/926	14/25278	0.407037	0.726852	TRINITY_DN67334_c0_g3_i3	http://www.kegg.jp/kegg-bin/show_pathway?ko00072	1
ko04141	Protein processing in endoplasmic reticulum	24/926	617/25278	0.410842	0.729922	TRINITY_DN48969_c0_g1_i1;TRINITY_DN70222_c0_g3_i2;TRINITY_DN70558_c0_g1_i2;TRINITY_DN72426_c0_g1_i3;TRINITY_DN72519_c0_g1_i1;TRINITY_DN74411_c0_g4_i1;TRINITY_DN74411_c1_g1_i1;TRINITY_DN76437_c5_g2_i1;TRINITY_DN77139_c0_g2_i1;TRINITY_DN77139_c0_g3_i1;TRINITY_DN79063_c2_g2_i2;TRINITY_DN79343_c0_g1_i2;TRINITY_DN79352_c2_g5_i3;TRINITY_DN81916_c7_g2_i4;TRINITY_DN82972_c4_g1_i2;TRINITY_DN85586_c1_g4_i1…	http://www.kegg.jp/kegg-bin/show_pathway?ko04141	24
ko03022	Basal transcription factors	4/926	90/25278	0.420302	0.740209	TRINITY_DN80148_c0_g1_i3;TRINITY_DN88177_c0_g6_i1;TRINITY_DN91328_c1_g1_i1;TRINITY_DN96836_c2_g2_i7	http://www.kegg.jp/kegg-bin/show_pathway?ko03022	4
ko04392	Hippo signaling pathway - multiple species	2/926	39/25278	0.420862	0.740209	TRINITY_DN83256_c0_g5_i2;TRINITY_DN93272_c0_g1_i3	http://www.kegg.jp/kegg-bin/show_pathway?ko04392	2
ko00983	Drug metabolism - other enzymes	8/926	196/25278	0.428657	0.75015	TRINITY_DN53516_c0_g1_i1;TRINITY_DN68994_c0_g1_i2;TRINITY_DN72144_c3_g1_i1;TRINITY_DN76967_c1_g5_i1;TRINITY_DN81698_c0_g5_i4;TRINITY_DN89925_c1_g2_i4;TRINITY_DN94609_c0_g1_i7;TRINITY_DN114980_c0_g1_i1	http://www.kegg.jp/kegg-bin/show_pathway?ko00983	8
ko01522	Endocrine resistance	69/926	1839/25278	0.435407	0.757815	TRINITY_DN63877_c0_g1_i1;TRINITY_DN67773_c0_g1_i1;TRINITY_DN67876_c0_g1_i2;TRINITY_DN68505_c0_g1_i2;TRINITY_DN68686_c2_g1_i2;TRINITY_DN70028_c0_g1_i11;TRINITY_DN71232_c0_g1_i8;TRINITY_DN71268_c1_g3_i1;TRINITY_DN71631_c0_g2_i1;TRINITY_DN71631_c0_g3_i5;TRINITY_DN71724_c0_g2_i3;TRINITY_DN72075_c0_g2_i3;TRINITY_DN72364_c0_g1_i1;TRINITY_DN72538_c0_g1_i2;TRINITY_DN72637_c3_g1_i1;TRINITY_DN72637_c4_g1_i…	http://www.kegg.jp/kegg-bin/show_pathway?ko01522	69
ko05034	Alcoholism	12/926	304/25278	0.437368	0.757815	TRINITY_DN70077_c0_g1_i2;TRINITY_DN72538_c0_g1_i2;TRINITY_DN73335_c0_g2_i1;TRINITY_DN73594_c1_g1_i2;TRINITY_DN73594_c1_g4_i1;TRINITY_DN75076_c0_g1_i3;TRINITY_DN80140_c0_g5_i1;TRINITY_DN82207_c2_g5_i2;TRINITY_DN87040_c1_g1_i2;TRINITY_DN89942_c1_g3_i1;TRINITY_DN92359_c2_g9_i1;TRINITY_DN93835_c2_g1_i6	http://www.kegg.jp/kegg-bin/show_pathway?ko05034	12
ko00950	Isoquinoline alkaloid biosynthesis	2/926	41/25278	0.446081	0.769104	TRINITY_DN84687_c5_g1_i14;TRINITY_DN90408_c0_g6_i1	http://www.kegg.jp/kegg-bin/show_pathway?ko00950	2
ko04214	Apoptosis - fly	4/926	94/25278	0.453082	0.777346	TRINITY_DN72538_c0_g1_i2;TRINITY_DN80140_c0_g5_i1;TRINITY_DN89549_c0_g1_i12;TRINITY_DN89942_c1_g3_i1	http://www.kegg.jp/kegg-bin/show_pathway?ko04214	4
ko04031	GTP-binding proteins	6/926	148/25278	0.459153	0.78392	TRINITY_DN68282_c0_g1_i1;TRINITY_DN72550_c0_g4_i1;TRINITY_DN72550_c0_g1_i13;TRINITY_DN90969_c4_g1_i4;TRINITY_DN92060_c2_g3_i1;TRINITY_DN94031_c1_g3_i2	http://www.kegg.jp/kegg-bin/show_pathway?ko04031	6
ko04930	Type II diabetes mellitus	4/926	96/25278	0.469246	0.797262	TRINITY_DN72538_c0_g1_i2;TRINITY_DN76984_c3_g1_i3;TRINITY_DN80140_c0_g5_i1;TRINITY_DN89942_c1_g3_i1	http://www.kegg.jp/kegg-bin/show_pathway?ko04930	4
ko04112	Cell cycle - Caulobacter	3/926	71/25278	0.484817	0.819739	TRINITY_DN68878_c0_g1_i1;TRINITY_DN89072_c0_g1_i1;TRINITY_DN92311_c0_g4_i4	http://www.kegg.jp/kegg-bin/show_pathway?ko04112	3
ko04914	Progesterone-mediated oocyte maturation	6/926	155/25278	0.503796	0.847734	TRINITY_DN72538_c0_g1_i2;TRINITY_DN73594_c1_g1_i2;TRINITY_DN73594_c1_g4_i1;TRINITY_DN80140_c0_g5_i1;TRINITY_DN89942_c1_g3_i1;TRINITY_DN94218_c4_g1_i1	http://www.kegg.jp/kegg-bin/show_pathway?ko04914	6
ko04011	MAPK signaling pathway - yeast	6/926	157/25278	0.516316	0.858944	TRINITY_DN72538_c0_g1_i2;TRINITY_DN78194_c2_g2_i3;TRINITY_DN80140_c0_g5_i1;TRINITY_DN89942_c1_g3_i1;TRINITY_DN90204_c2_g3_i5;TRINITY_DN93149_c1_g1_i14	http://www.kegg.jp/kegg-bin/show_pathway?ko04011	6
ko05160	Hepatitis C	4/926	102/25278	0.516594	0.858944	TRINITY_DN72538_c0_g1_i2;TRINITY_DN78194_c2_g2_i3;TRINITY_DN80140_c0_g5_i1;TRINITY_DN89942_c1_g3_i1	http://www.kegg.jp/kegg-bin/show_pathway?ko05160	4
ko04330	Notch signaling pathway	2/926	47/25278	0.51782	0.858944	TRINITY_DN70584_c0_g1_i5;TRINITY_DN88462_c4_g2_i3	http://www.kegg.jp/kegg-bin/show_pathway?ko04330	2
ko00960	Tropane, piperidine and pyridine alkaloid biosynthesis	2/926	48/25278	0.529163	0.871753	TRINITY_DN84687_c5_g1_i14;TRINITY_DN90408_c0_g6_i1	http://www.kegg.jp/kegg-bin/show_pathway?ko00960	2
ko04020	Calcium signaling pathway	3/926	76/25278	0.530524	0.871753	TRINITY_DN70077_c0_g1_i2;TRINITY_DN71332_c0_g1_i2;TRINITY_DN85212_c1_g1_i1	http://www.kegg.jp/kegg-bin/show_pathway?ko04020	3
ko00590	Arachidonic acid metabolism	2/926	49/25278	0.540323	0.883705	TRINITY_DN74166_c5_g1_i4;TRINITY_DN77439_c6_g1_i1	http://www.kegg.jp/kegg-bin/show_pathway?ko00590	2
ko04970	Salivary secretion	1/926	21/25278	0.543445	0.884678	TRINITY_DN70077_c0_g1_i2	http://www.kegg.jp/kegg-bin/show_pathway?ko04970	1
ko04744	Phototransduction	1/926	22/25278	0.560184	0.903522	TRINITY_DN70077_c0_g1_i2	http://www.kegg.jp/kegg-bin/show_pathway?ko04744	1
ko04971	Gastric acid secretion	1/926	22/25278	0.560184	0.903522	TRINITY_DN70077_c0_g1_i2	http://www.kegg.jp/kegg-bin/show_pathway?ko04971	1
ko03060	Protein export	5/926	137/25278	0.566582	0.906373	TRINITY_DN48969_c0_g1_i1;TRINITY_DN69882_c0_g1_i1;TRINITY_DN79352_c2_g5_i3;TRINITY_DN82972_c4_g1_i2;TRINITY_DN90238_c5_g3_i3	http://www.kegg.jp/kegg-bin/show_pathway?ko03060	5
ko05130	Pathogenic Escherichia coli infection	4/926	109/25278	0.569197	0.906373	TRINITY_DN69624_c0_g1_i3;TRINITY_DN75244_c0_g2_i3;TRINITY_DN77266_c0_g5_i1;TRINITY_DN84921_c1_g1_i2	http://www.kegg.jp/kegg-bin/show_pathway?ko05130	4
ko00051	Fructose and mannose metabolism	7/926	194/25278	0.56972	0.906373	TRINITY_DN68250_c0_g3_i1;TRINITY_DN69497_c0_g1_i2;TRINITY_DN81512_c2_g2_i1;TRINITY_DN81512_c2_g5_i1;TRINITY_DN83684_c0_g4_i1;TRINITY_DN94061_c3_g4_i6;TRINITY_DN94515_c2_g7_i1	http://www.kegg.jp/kegg-bin/show_pathway?ko00051	7
ko04740	Olfactory transduction	1/926	23/25278	0.576309	0.912707	TRINITY_DN70077_c0_g1_i2	http://www.kegg.jp/kegg-bin/show_pathway?ko04740	1
ko05134	Legionellosis	8/926	224/25278	0.579149	0.913072	TRINITY_DN71323_c1_g3_i5;TRINITY_DN74411_c0_g4_i1;TRINITY_DN74411_c1_g1_i1;TRINITY_DN79343_c0_g1_i2;TRINITY_DN89313_c1_g4_i3;TRINITY_DN90969_c4_g1_i4;TRINITY_DN92060_c2_g3_i1;TRINITY_DN93828_c1_g7_i1	http://www.kegg.jp/kegg-bin/show_pathway?ko05134	8
ko03440	Homologous recombination	6/926	169/25278	0.588548	0.918869	TRINITY_DN70866_c0_g1_i2;TRINITY_DN71261_c4_g2_i1;TRINITY_DN74852_c5_g5_i1;TRINITY_DN87517_c0_g1_i15;TRINITY_DN89549_c0_g1_i12;TRINITY_DN96587_c2_g1_i4	http://www.kegg.jp/kegg-bin/show_pathway?ko03440	6
ko00196	Photosynthesis - antenna proteins	1/926	24/25278	0.591844	0.918869	TRINITY_DN58158_c0_g1_i1	http://www.kegg.jp/kegg-bin/show_pathway?ko00196	1
ko04974	Protein digestion and absorption	1/926	24/25278	0.591844	0.918869	TRINITY_DN78723_c0_g1_i7	http://www.kegg.jp/kegg-bin/show_pathway?ko04974	1
ko00625	Chloroalkane and chloroalkene degradation	2/926	54/25278	0.593327	0.918869	TRINITY_DN74166_c5_g1_i4;TRINITY_DN93289_c0_g2_i1	http://www.kegg.jp/kegg-bin/show_pathway?ko00625	2
ko04745	Phototransduction - fly	1/926	25/25278	0.60681	0.930483	TRINITY_DN70077_c0_g1_i2	http://www.kegg.jp/kegg-bin/show_pathway?ko04745	1
ko00626	Naphthalene degradation	1/926	25/25278	0.60681	0.930483	TRINITY_DN93289_c0_g2_i1	http://www.kegg.jp/kegg-bin/show_pathway?ko00626	1
ko03030	DNA replication	10/926	287/25278	0.608802	0.930483	TRINITY_DN72464_c0_g1_i1;TRINITY_DN74852_c5_g5_i1;TRINITY_DN75765_c1_g9_i1;TRINITY_DN76031_c2_g7_i1;TRINITY_DN85274_c2_g1_i4;TRINITY_DN85394_c1_g3_i9;TRINITY_DN87517_c0_g1_i15;TRINITY_DN90195_c0_g3_i1;TRINITY_DN94385_c1_g5_i2;TRINITY_DN95968_c6_g11_i1	http://www.kegg.jp/kegg-bin/show_pathway?ko03030	10
ko04659	Th17 cell differentiation	3/926	86/25278	0.614628	0.935303	TRINITY_DN72538_c0_g1_i2;TRINITY_DN80140_c0_g5_i1;TRINITY_DN89942_c1_g3_i1	http://www.kegg.jp/kegg-bin/show_pathway?ko04659	3
ko04657	IL-17 signaling pathway	4/926	117/25278	0.625198	0.94727	TRINITY_DN72538_c0_g1_i2;TRINITY_DN80140_c0_g5_i1;TRINITY_DN89942_c1_g3_i1;TRINITY_DN92298_c1_g5_i1	http://www.kegg.jp/kegg-bin/show_pathway?ko04657	4
ko05168	Herpes simplex infection	8/926	234/25278	0.628353	0.947946	TRINITY_DN70584_c0_g1_i5;TRINITY_DN76437_c5_g2_i1;TRINITY_DN77139_c0_g2_i1;TRINITY_DN77139_c0_g3_i1;TRINITY_DN80976_c2_g5_i1;TRINITY_DN88013_c3_g8_i1;TRINITY_DN96836_c2_g2_i7;TRINITY_DN97304_c12_g1_i1	http://www.kegg.jp/kegg-bin/show_pathway?ko05168	8
ko00537	Glycosylphosphatidylinositol (GPI)-anchored proteins	1/926	27/25278	0.635118	0.95404	TRINITY_DN88897_c1_g2_i2	http://www.kegg.jp/kegg-bin/show_pathway?ko00537	1
ko03450	Non-homologous end-joining	1/926	28/25278	0.648499	0.965058	TRINITY_DN71261_c4_g2_i1	http://www.kegg.jp/kegg-bin/show_pathway?ko03450	1
ko04147	Exosome	65/926	1845/25278	0.649114	0.965058	TRINITY_DN45686_c0_g1_i1;TRINITY_DN48969_c0_g1_i1;TRINITY_DN65237_c0_g1_i1;TRINITY_DN68250_c0_g3_i1;TRINITY_DN68282_c0_g1_i1;TRINITY_DN68555_c0_g1_i2;TRINITY_DN69851_c0_g1_i4;TRINITY_DN70077_c0_g1_i2;TRINITY_DN70952_c0_g2_i3;TRINITY_DN71323_c1_g3_i5;TRINITY_DN71607_c0_g4_i1;TRINITY_DN71607_c0_g1_i7;TRINITY_DN72538_c0_g1_i2;TRINITY_DN72550_c0_g4_i1;TRINITY_DN72550_c0_g1_i13;TRINITY_DN72706_c0_g1_i…	http://www.kegg.jp/kegg-bin/show_pathway?ko04147	65
ko04961	Endocrine and other factor-regulated calcium reabsorption	2/926	60/25278	0.650725	0.965058	TRINITY_DN68282_c0_g1_i1;TRINITY_DN87675_c2_g1_i2	http://www.kegg.jp/kegg-bin/show_pathway?ko04961	2
ko05100	Bacterial invasion of epithelial cells	2/926	62/25278	0.668369	0.985651	TRINITY_DN69624_c0_g1_i3;TRINITY_DN87675_c2_g1_i2	http://www.kegg.jp/kegg-bin/show_pathway?ko05100	2
ko05230	Central carbon metabolism in cancer	6/926	184/25278	0.670243	0.985651	TRINITY_DN72538_c0_g1_i2;TRINITY_DN73594_c1_g1_i2;TRINITY_DN73594_c1_g4_i1;TRINITY_DN76984_c3_g1_i3;TRINITY_DN80140_c0_g5_i1;TRINITY_DN89942_c1_g3_i1	http://www.kegg.jp/kegg-bin/show_pathway?ko05230	6
ko05322	Systemic lupus erythematosus	7/926	216/25278	0.681322	0.997752	TRINITY_DN73335_c0_g2_i1;TRINITY_DN75076_c0_g1_i3;TRINITY_DN82207_c2_g5_i2;TRINITY_DN83340_c0_g5_i1;TRINITY_DN87040_c1_g1_i2;TRINITY_DN92359_c2_g9_i1;TRINITY_DN93835_c2_g1_i6	http://www.kegg.jp/kegg-bin/show_pathway?ko05322	7
ko04261	Adrenergic signaling in cardiomyocytes	4/926	127/25278	0.68835	0.99998	TRINITY_DN70077_c0_g1_i2;TRINITY_DN72538_c0_g1_i2;TRINITY_DN80140_c0_g5_i1;TRINITY_DN89942_c1_g3_i1	http://www.kegg.jp/kegg-bin/show_pathway?ko04261	4
ko00330	Arginine and proline metabolism	7/926	219/25278	0.695027	0.99998	TRINITY_DN71668_c0_g1_i1;TRINITY_DN72718_c3_g5_i1;TRINITY_DN74358_c9_g6_i1;TRINITY_DN77316_c0_g10_i1;TRINITY_DN80141_c3_g2_i1;TRINITY_DN91188_c0_g1_i5;TRINITY_DN93848_c0_g1_i8	http://www.kegg.jp/kegg-bin/show_pathway?ko00330	7
ko00440	Phosphonate and phosphinate metabolism	1/926	32/25278	0.697297	0.99998	TRINITY_DN80339_c0_g1_i6	http://www.kegg.jp/kegg-bin/show_pathway?ko00440	1
ko04216	Ferroptosis	3/926	98/25278	0.701295	0.99998	TRINITY_DN78078_c0_g1_i1;TRINITY_DN87264_c1_g5_i1;TRINITY_DN90704_c2_g1_i6	http://www.kegg.jp/kegg-bin/show_pathway?ko04216	3
ko04723	Retrograde endocannabinoid signaling	4/926	130/25278	0.705754	0.99998	TRINITY_DN72538_c0_g1_i2;TRINITY_DN79988_c4_g1_i2;TRINITY_DN80140_c0_g5_i1;TRINITY_DN89942_c1_g3_i1	http://www.kegg.jp/kegg-bin/show_pathway?ko04723	4
ko04630	Jak-STAT signaling pathway	1/926	33/25278	0.708399	0.99998	TRINITY_DN70584_c0_g1_i5	http://www.kegg.jp/kegg-bin/show_pathway?ko04630	1
ko04137	Mitophagy - animal	2/926	67/25278	0.709325	0.99998	TRINITY_DN72550_c0_g4_i1;TRINITY_DN72550_c0_g1_i13	http://www.kegg.jp/kegg-bin/show_pathway?ko04137	2
ko01004	Lipid biosynthesis proteins	8/926	254/25278	0.71652	0.99998	TRINITY_DN72083_c0_g1_i4;TRINITY_DN72558_c0_g1_i2;TRINITY_DN77879_c0_g3_i4;TRINITY_DN78078_c0_g1_i1;TRINITY_DN83574_c5_g1_i4;TRINITY_DN86445_c0_g1_i1;TRINITY_DN87264_c1_g5_i1;TRINITY_DN88303_c2_g6_i13	http://www.kegg.jp/kegg-bin/show_pathway?ko01004	8
ko00061	Fatty acid biosynthesis	4/926	134/25278	0.727845	0.99998	TRINITY_DN72083_c0_g1_i4;TRINITY_DN78078_c0_g1_i1;TRINITY_DN86445_c0_g1_i1;TRINITY_DN87264_c1_g5_i1	http://www.kegg.jp/kegg-bin/show_pathway?ko00061	4
ko00480	Glutathione metabolism	9/926	288/25278	0.731824	0.99998	TRINITY_DN72144_c3_g1_i1;TRINITY_DN76967_c1_g5_i1;TRINITY_DN77439_c6_g1_i1;TRINITY_DN81698_c0_g5_i4;TRINITY_DN86753_c2_g7_i1;TRINITY_DN89925_c1_g2_i4;TRINITY_DN94609_c0_g1_i7;TRINITY_DN95935_c2_g1_i2;TRINITY_DN114980_c0_g1_i1	http://www.kegg.jp/kegg-bin/show_pathway?ko00480	9
ko01006	Prenyltransferases	2/926	71/25278	0.738968	0.99998	TRINITY_DN69285_c0_g1_i1;TRINITY_DN90343_c1_g7_i1	http://www.kegg.jp/kegg-bin/show_pathway?ko01006	2
ko00920	Sulfur metabolism	2/926	71/25278	0.738968	0.99998	TRINITY_DN79496_c1_g2_i2;TRINITY_DN86666_c2_g4_i2	http://www.kegg.jp/kegg-bin/show_pathway?ko00920	2
ko00790	Folate biosynthesis	2/926	71/25278	0.738968	0.99998	TRINITY_DN69851_c0_g1_i4;TRINITY_DN90573_c1_g3_i1	http://www.kegg.jp/kegg-bin/show_pathway?ko00790	2
ko05203	Viral carcinogenesis	14/926	440/25278	0.741831	0.99998	TRINITY_DN70584_c0_g1_i5;TRINITY_DN72538_c0_g1_i2;TRINITY_DN73335_c0_g2_i1;TRINITY_DN75076_c0_g1_i3;TRINITY_DN76984_c3_g1_i3;TRINITY_DN80140_c0_g5_i1;TRINITY_DN80148_c0_g1_i3;TRINITY_DN82207_c2_g5_i2;TRINITY_DN87040_c1_g1_i2;TRINITY_DN88177_c0_g6_i1;TRINITY_DN89942_c1_g3_i1;TRINITY_DN92359_c2_g9_i1;TRINITY_DN93835_c2_g1_i6;TRINITY_DN95483_c2_g1_i3	http://www.kegg.jp/kegg-bin/show_pathway?ko05203	14
ko04924	Renin secretion	1/926	37/25278	0.748889	0.99998	TRINITY_DN70077_c0_g1_i2	http://www.kegg.jp/kegg-bin/show_pathway?ko04924	1
ko04122	Sulfur relay system	1/926	37/25278	0.748889	0.99998	TRINITY_DN71529_c0_g1_i5	http://www.kegg.jp/kegg-bin/show_pathway?ko04122	1
ko05202	Transcriptional misregulation in cancers	4/926	139/25278	0.753687	0.99998	TRINITY_DN70450_c0_g1_i1;TRINITY_DN75127_c1_g1_i4;TRINITY_DN89549_c0_g1_i12;TRINITY_DN96985_c7_g1_i1	http://www.kegg.jp/kegg-bin/show_pathway?ko05202	4
ko00220	Arginine biosynthesis	3/926	107/25278	0.755954	0.99998	TRINITY_DN68555_c0_g1_i2;TRINITY_DN86184_c0_g1_i7;TRINITY_DN87935_c1_g1_i4	http://www.kegg.jp/kegg-bin/show_pathway?ko00220	3
ko00400	Phenylalanine, tyrosine and tryptophan biosynthesis	4/926	141/25278	0.76348	0.99998	TRINITY_DN72971_c0_g1_i3;TRINITY_DN81835_c2_g1_i3;TRINITY_DN82036_c3_g1_i3;TRINITY_DN93483_c1_g5_i1	http://www.kegg.jp/kegg-bin/show_pathway?ko00400	4
ko00520	Amino sugar and nucleotide sugar metabolism	13/926	418/25278	0.764406	0.99998	TRINITY_DN74830_c0_g1_i3;TRINITY_DN75739_c1_g2_i1;TRINITY_DN82302_c0_g6_i1;TRINITY_DN82428_c6_g5_i2;TRINITY_DN87707_c0_g8_i1;TRINITY_DN92750_c0_g1_i6;TRINITY_DN92991_c1_g1_i1;TRINITY_DN93021_c1_g6_i2;TRINITY_DN93766_c1_g3_i1;TRINITY_DN94061_c3_g4_i6;TRINITY_DN94611_c5_g1_i1;TRINITY_DN94611_c6_g2_i2;TRINITY_DN94611_c6_g3_i7	http://www.kegg.jp/kegg-bin/show_pathway?ko00520	13
ko00710	Carbon fixation in photosynthetic organisms	8/926	267/25278	0.765786	0.99998	TRINITY_DN68250_c0_g3_i1;TRINITY_DN68757_c0_g1_i1;TRINITY_DN70263_c0_g1_i2;TRINITY_DN76098_c0_g3_i1;TRINITY_DN77891_c0_g1_i1;TRINITY_DN77891_c1_g1_i5;TRINITY_DN91900_c4_g1_i3;TRINITY_DN92966_c1_g2_i1	http://www.kegg.jp/kegg-bin/show_pathway?ko00710	8
ko04972	Pancreatic secretion	1/926	39/25278	0.766976	0.99998	TRINITY_DN68282_c0_g1_i1	http://www.kegg.jp/kegg-bin/show_pathway?ko04972	1
ko04750	Inflammatory mediator regulation of TRP channels	1/926	39/25278	0.766976	0.99998	TRINITY_DN70077_c0_g1_i2	http://www.kegg.jp/kegg-bin/show_pathway?ko04750	1
ko04115	p53 signaling pathway	3/926	110/25278	0.772282	0.99998	TRINITY_DN81375_c4_g1_i1;TRINITY_DN89549_c0_g1_i12;TRINITY_DN94218_c4_g1_i1	http://www.kegg.jp/kegg-bin/show_pathway?ko04115	3
ko05222	Small cell lung cancer	1/926	40/25278	0.775526	0.99998	TRINITY_DN65260_c1_g1_i1	http://www.kegg.jp/kegg-bin/show_pathway?ko05222	1
ko03460	Fanconi anemia pathway	3/926	111/25278	0.777523	0.99998	TRINITY_DN74565_c0_g1_i2;TRINITY_DN87517_c0_g1_i15;TRINITY_DN94653_c0_g3_i1	http://www.kegg.jp/kegg-bin/show_pathway?ko03460	3
ko04111	Cell cycle - yeast	7/926	240/25278	0.779956	0.99998	TRINITY_DN76437_c5_g2_i1;TRINITY_DN77139_c0_g2_i1;TRINITY_DN77139_c0_g3_i1;TRINITY_DN83256_c0_g5_i2;TRINITY_DN88013_c3_g8_i1;TRINITY_DN90636_c0_g1_i7;TRINITY_DN93272_c0_g1_i3	http://www.kegg.jp/kegg-bin/show_pathway?ko04111	7
ko01040	Biosynthesis of unsaturated fatty acids	3/926	114/25278	0.792651	0.99998	TRINITY_DN79690_c2_g2_i8;TRINITY_DN83574_c5_g1_i4;TRINITY_DN88303_c2_g6_i13	http://www.kegg.jp/kegg-bin/show_pathway?ko01040	3
ko03320	PPAR signaling pathway	5/926	182/25278	0.800618	0.99998	TRINITY_DN78078_c0_g1_i1;TRINITY_DN78194_c2_g2_i3;TRINITY_DN79203_c1_g4_i3;TRINITY_DN79690_c2_g2_i8;TRINITY_DN87264_c1_g5_i1	http://www.kegg.jp/kegg-bin/show_pathway?ko03320	5
ko00130	Ubiquinone and other terpenoid-quinone biosynthesis	3/926	117/25278	0.806912	0.99998	TRINITY_DN75256_c0_g2_i1;TRINITY_DN75256_c0_g1_i2;TRINITY_DN95473_c1_g7_i2	http://www.kegg.jp/kegg-bin/show_pathway?ko00130	3
ko00630	Glyoxylate and dicarboxylate metabolism	7/926	249/25278	0.810483	0.99998	TRINITY_DN68555_c0_g1_i2;TRINITY_DN68757_c0_g1_i1;TRINITY_DN77283_c0_g1_i4;TRINITY_DN77283_c0_g5_i1;TRINITY_DN88208_c2_g3_i1;TRINITY_DN88208_c2_g1_i2;TRINITY_DN90204_c2_g3_i5	http://www.kegg.jp/kegg-bin/show_pathway?ko00630	7
ko04110	Cell cycle	8/926	282/25278	0.814622	0.99998	TRINITY_DN70584_c0_g1_i5;TRINITY_DN76437_c5_g2_i1;TRINITY_DN77139_c0_g2_i1;TRINITY_DN77139_c0_g3_i1;TRINITY_DN88013_c3_g8_i1;TRINITY_DN89549_c0_g1_i12;TRINITY_DN90636_c0_g1_i7;TRINITY_DN94218_c4_g1_i1	http://www.kegg.jp/kegg-bin/show_pathway?ko04110	8
ko04623	Cytosolic DNA-sensing pathway	1/926	46/25278	0.820629	0.99998	TRINITY_DN66112_c0_g1_i3	http://www.kegg.jp/kegg-bin/show_pathway?ko04623	1
ko00511	Other glycan degradation	1/926	49/25278	0.839663	0.99998	TRINITY_DN93236_c0_g5_i1	http://www.kegg.jp/kegg-bin/show_pathway?ko00511	1
ko00908	Zeatin biosynthesis	1/926	49/25278	0.839663	0.99998	TRINITY_DN87701_c0_g5_i2	http://www.kegg.jp/kegg-bin/show_pathway?ko00908	1
ko00194	Photosynthesis proteins	4/926	161/25278	0.845346	0.99998	TRINITY_DN58158_c0_g1_i1;TRINITY_DN62566_c0_g1_i1;TRINITY_DN69373_c0_g1_i3;TRINITY_DN78346_c2_g2_i5	http://www.kegg.jp/kegg-bin/show_pathway?ko00194	4
ko00260	Glycine, serine and threonine metabolism	6/926	229/25278	0.847998	0.99998	TRINITY_DN73492_c2_g2_i6;TRINITY_DN81143_c1_g3_i1;TRINITY_DN82387_c4_g3_i3;TRINITY_DN84687_c5_g1_i14;TRINITY_DN90408_c0_g6_i1;TRINITY_DN93791_c4_g1_i3	http://www.kegg.jp/kegg-bin/show_pathway?ko00260	6
ko00730	Thiamine metabolism	2/926	91/25278	0.851064	0.99998	TRINITY_DN70368_c0_g1_i2;TRINITY_DN97210_c2_g5_i1	http://www.kegg.jp/kegg-bin/show_pathway?ko00730	2
ko04138	Autophagy - yeast	3/926	128/25278	0.852302	0.99998	TRINITY_DN72550_c0_g4_i1;TRINITY_DN72550_c0_g1_i13;TRINITY_DN88186_c0_g1_i9	http://www.kegg.jp/kegg-bin/show_pathway?ko04138	3
ko04391	Hippo signaling pathway -fly	2/926	92/25278	0.855311	0.99998	TRINITY_DN83256_c0_g5_i2;TRINITY_DN93272_c0_g1_i3	http://www.kegg.jp/kegg-bin/show_pathway?ko04391	2
ko03110	Chaperones and folding catalysts	22/926	732/25278	0.856924	0.99998	TRINITY_DN48969_c0_g1_i1;TRINITY_DN72426_c0_g1_i3;TRINITY_DN74227_c5_g1_i1;TRINITY_DN74411_c0_g4_i1;TRINITY_DN74411_c1_g1_i1;TRINITY_DN77749_c1_g7_i1;TRINITY_DN79063_c2_g2_i2;TRINITY_DN79343_c0_g1_i2;TRINITY_DN79352_c2_g5_i3;TRINITY_DN81011_c0_g2_i4;TRINITY_DN81916_c7_g2_i4;TRINITY_DN82972_c4_g1_i2;TRINITY_DN84444_c1_g2_i12;TRINITY_DN88781_c1_g9_i1;TRINITY_DN89800_c1_g5_i1;TRINITY_DN89800_c1_g3_i…	http://www.kegg.jp/kegg-bin/show_pathway?ko03110	22
ko04120	Ubiquitin mediated proteolysis	12/926	426/25278	0.859151	0.99998	TRINITY_DN70558_c0_g1_i2;TRINITY_DN72519_c0_g1_i1;TRINITY_DN74875_c0_g2_i3;TRINITY_DN75514_c0_g1_i1;TRINITY_DN76437_c5_g2_i1;TRINITY_DN77139_c0_g2_i1;TRINITY_DN77139_c0_g3_i1;TRINITY_DN80209_c2_g8_i2;TRINITY_DN80224_c0_g2_i1;TRINITY_DN81375_c4_g1_i1;TRINITY_DN85716_c0_g1_i22;TRINITY_DN88013_c3_g8_i1	http://www.kegg.jp/kegg-bin/show_pathway?ko04120	12
ko05031	Amphetamine addiction	1/926	54/25278	0.867007	0.99998	TRINITY_DN70077_c0_g1_i2	http://www.kegg.jp/kegg-bin/show_pathway?ko05031	1
ko00195	Photosynthesis	3/926	133/25278	0.869661	0.99998	TRINITY_DN62566_c0_g1_i1;TRINITY_DN69373_c0_g1_i3;TRINITY_DN78346_c2_g2_i5	http://www.kegg.jp/kegg-bin/show_pathway?ko00195	3
ko00071	Fatty acid degradation	4/926	170/25278	0.873571	0.99998	TRINITY_DN78078_c0_g1_i1;TRINITY_DN79690_c2_g2_i8;TRINITY_DN87264_c1_g5_i1;TRINITY_DN93289_c0_g2_i1	http://www.kegg.jp/kegg-bin/show_pathway?ko00071	4
ko03032	DNA replication proteins	15/926	530/25278	0.877629	0.99998	TRINITY_DN71261_c4_g2_i1;TRINITY_DN72464_c0_g1_i1;TRINITY_DN74852_c5_g5_i1;TRINITY_DN75765_c1_g9_i1;TRINITY_DN76031_c2_g7_i1;TRINITY_DN77207_c2_g1_i3;TRINITY_DN79458_c0_g1_i8;TRINITY_DN85274_c2_g1_i4;TRINITY_DN85394_c1_g3_i9;TRINITY_DN87517_c0_g1_i15;TRINITY_DN89549_c0_g1_i12;TRINITY_DN90195_c0_g3_i1;TRINITY_DN94218_c4_g1_i1;TRINITY_DN94385_c1_g5_i2;TRINITY_DN95968_c6_g11_i1	http://www.kegg.jp/kegg-bin/show_pathway?ko03032	15
ko00290	Valine, leucine and isoleucine biosynthesis	2/926	98/25278	0.878548	0.99998	TRINITY_DN82774_c1_g5_i4;TRINITY_DN94074_c1_g4_i1	http://www.kegg.jp/kegg-bin/show_pathway?ko00290	2
ko00600	Sphingolipid metabolism	2/926	100/25278	0.885495	0.99998	TRINITY_DN93236_c0_g5_i1;TRINITY_DN93786_c0_g2_i1	http://www.kegg.jp/kegg-bin/show_pathway?ko00600	2
ko04721	Synaptic vesicle cycle	3/926	139/25278	0.888094	0.99998	TRINITY_DN79988_c4_g1_i2;TRINITY_DN87675_c2_g1_i2;TRINITY_DN88186_c0_g1_i9	http://www.kegg.jp/kegg-bin/show_pathway?ko04721	3
ko03020	RNA polymerase	2/926	105/25278	0.901282	0.99998	TRINITY_DN66112_c0_g1_i3;TRINITY_DN83494_c5_g7_i1	http://www.kegg.jp/kegg-bin/show_pathway?ko03020	2
ko03036	Chromosome and associated proteins	62/926	1958/25278	0.901922	0.99998	TRINITY_DN69769_c2_g1_i1;TRINITY_DN70077_c0_g1_i2;TRINITY_DN70135_c0_g2_i3;TRINITY_DN70584_c0_g1_i5;TRINITY_DN70698_c0_g1_i4;TRINITY_DN71792_c0_g4_i1;TRINITY_DN72538_c0_g1_i2;TRINITY_DN73335_c0_g2_i1;TRINITY_DN74285_c2_g3_i2;TRINITY_DN74285_c2_g5_i2;TRINITY_DN75076_c0_g1_i3;TRINITY_DN75244_c0_g2_i3;TRINITY_DN76437_c5_g2_i1;TRINITY_DN77139_c0_g2_i1;TRINITY_DN77139_c0_g3_i1;TRINITY_DN77266_c0_g5_i1…	http://www.kegg.jp/kegg-bin/show_pathway?ko03036	62
ko00780	Biotin metabolism	1/926	64/25278	0.908512	0.99998	TRINITY_DN86445_c0_g1_i1	http://www.kegg.jp/kegg-bin/show_pathway?ko00780	1
ko04130	SNARE interactions in vesicular transport	1/926	64/25278	0.908512	0.99998	TRINITY_DN75731_c2_g1_i1	http://www.kegg.jp/kegg-bin/show_pathway?ko04130	1
ko00450	Selenocompound metabolism	2/926	108/25278	0.909754	0.99998	TRINITY_DN72357_c5_g1_i1;TRINITY_DN86348_c0_g3_i2	http://www.kegg.jp/kegg-bin/show_pathway?ko00450	2
ko00680	Methane metabolism	5/926	221/25278	0.9108	0.99998	TRINITY_DN68250_c0_g3_i1;TRINITY_DN73492_c2_g2_i6;TRINITY_DN78072_c0_g2_i20;TRINITY_DN82387_c4_g3_i3;TRINITY_DN93791_c4_g1_i3	http://www.kegg.jp/kegg-bin/show_pathway?ko00680	5
ko04621	NOD-like receptor signaling pathway	3/926	148/25278	0.911386	0.99998	TRINITY_DN72538_c0_g1_i2;TRINITY_DN80140_c0_g5_i1;TRINITY_DN89942_c1_g3_i1	http://www.kegg.jp/kegg-bin/show_pathway?ko04621	3
ko00860	Porphyrin and chlorophyll metabolism	3/926	149/25278	0.913683	0.99998	TRINITY_DN68876_c0_g1_i1;TRINITY_DN68994_c0_g1_i2;TRINITY_DN78172_c1_g2_i1	http://www.kegg.jp/kegg-bin/show_pathway?ko00860	3
ko00340	Histidine metabolism	1/926	66/25278	0.915109	0.99998	TRINITY_DN68572_c0_g1_i1	http://www.kegg.jp/kegg-bin/show_pathway?ko00340	1
ko03420	Nucleotide excision repair	5/926	225/25278	0.918318	0.99998	TRINITY_DN74852_c5_g5_i1;TRINITY_DN80148_c0_g1_i3;TRINITY_DN85274_c2_g1_i4;TRINITY_DN87517_c0_g1_i15;TRINITY_DN88177_c0_g6_i1	http://www.kegg.jp/kegg-bin/show_pathway?ko03420	5
ko05014	Amyotrophic lateral sclerosis (ALS)	1/926	68/25278	0.92123	0.99998	TRINITY_DN90204_c2_g3_i5	http://www.kegg.jp/kegg-bin/show_pathway?ko05014	1
ko03021	Transcription machinery	17/926	628/25278	0.924529	0.99998	TRINITY_DN66112_c0_g1_i3;TRINITY_DN71317_c1_g1_i3;TRINITY_DN75370_c1_g1_i2;TRINITY_DN79195_c5_g3_i1;TRINITY_DN80148_c0_g1_i3;TRINITY_DN80567_c0_g6_i1;TRINITY_DN80634_c8_g2_i3;TRINITY_DN83494_c5_g7_i1;TRINITY_DN83910_c4_g3_i5;TRINITY_DN88177_c0_g6_i1;TRINITY_DN88898_c7_g4_i1;TRINITY_DN91328_c1_g1_i1;TRINITY_DN96539_c1_g10_i1;TRINITY_DN96539_c2_g1_i1;TRINITY_DN96608_c3_g7_i2;TRINITY_DN96836_c2_g2_i…	http://www.kegg.jp/kegg-bin/show_pathway?ko03021	17
ko04217	Necroptosis	5/926	230/25278	0.926925	0.99998	TRINITY_DN68555_c0_g1_i2;TRINITY_DN71332_c0_g1_i2;TRINITY_DN87935_c1_g1_i4;TRINITY_DN89966_c3_g3_i1;TRINITY_DN89966_c3_g2_i2	http://www.kegg.jp/kegg-bin/show_pathway?ko04217	5
ko04390	Hippo signaling pathway	2/926	117/25278	0.931259	0.99998	TRINITY_DN83256_c0_g5_i2;TRINITY_DN93272_c0_g1_i3	http://www.kegg.jp/kegg-bin/show_pathway?ko04390	2
ko00760	Nicotinate and nicotinamide metabolism	1/926	73/25278	0.934673	0.99998	TRINITY_DN95781_c1_g4_i3	http://www.kegg.jp/kegg-bin/show_pathway?ko00760	1
ko03410	Base excision repair	2/926	119/25278	0.93533	0.99998	TRINITY_DN71907_c0_g1_i1;TRINITY_DN74852_c5_g5_i1	http://www.kegg.jp/kegg-bin/show_pathway?ko03410	2
ko00100	Steroid biosynthesis	1/926	74/25278	0.937073	0.99998	TRINITY_DN70298_c0_g1_i6	http://www.kegg.jp/kegg-bin/show_pathway?ko00100	1
ko04812	Cytoskeleton proteins	12/926	479/25278	0.938251	0.99998	TRINITY_DN69624_c0_g1_i3;TRINITY_DN71607_c0_g4_i1;TRINITY_DN71607_c0_g1_i7;TRINITY_DN73519_c0_g4_i3;TRINITY_DN77266_c0_g5_i1;TRINITY_DN82312_c1_g1_i5;TRINITY_DN84657_c0_g1_i8;TRINITY_DN84921_c1_g1_i2;TRINITY_DN86713_c0_g5_i3;TRINITY_DN90414_c0_g8_i1;TRINITY_DN95483_c2_g1_i3;TRINITY_DN96834_c2_g2_i4	http://www.kegg.jp/kegg-bin/show_pathway?ko04812	12
ko04728	Dopaminergic synapse	2/926	122/25278	0.941011	0.99998	TRINITY_DN65237_c0_g1_i1;TRINITY_DN70077_c0_g1_i2	http://www.kegg.jp/kegg-bin/show_pathway?ko04728	2
ko05010	Alzheimer's disease	6/926	278/25278	0.943791	0.99998	TRINITY_DN70077_c0_g1_i2;TRINITY_DN70222_c0_g3_i2;TRINITY_DN72538_c0_g1_i2;TRINITY_DN80140_c0_g5_i1;TRINITY_DN89942_c1_g3_i1;TRINITY_DN96593_c1_g1_i11	http://www.kegg.jp/kegg-bin/show_pathway?ko05010	6
ko03018	RNA degradation	7/926	314/25278	0.944176	0.99998	TRINITY_DN71017_c0_g5_i1;TRINITY_DN73841_c3_g2_i1;TRINITY_DN78072_c0_g2_i20;TRINITY_DN90020_c3_g1_i4;TRINITY_DN93828_c1_g7_i1;TRINITY_DN94867_c0_g8_i1;TRINITY_DN102295_c0_g1_i1	http://www.kegg.jp/kegg-bin/show_pathway?ko03018	7
ko00906	Carotenoid biosynthesis	1/926	81/25278	0.95158	0.99998	TRINITY_DN78442_c1_g1_i1	http://www.kegg.jp/kegg-bin/show_pathway?ko00906	1
ko03430	Mismatch repair	3/926	174/25278	0.956057	0.99998	TRINITY_DN69615_c0_g1_i4;TRINITY_DN85274_c2_g1_i4;TRINITY_DN87517_c0_g1_i15	http://www.kegg.jp/kegg-bin/show_pathway?ko03430	3
ko00010	Glycolysis / Gluconeogenesis	11/926	467/25278	0.957546	0.99998	TRINITY_DN68250_c0_g3_i1;TRINITY_DN73492_c2_g2_i6;TRINITY_DN76984_c3_g1_i3;TRINITY_DN77891_c0_g1_i1;TRINITY_DN77891_c1_g1_i5;TRINITY_DN78072_c0_g2_i20;TRINITY_DN82387_c4_g3_i3;TRINITY_DN91900_c4_g1_i3;TRINITY_DN92966_c1_g2_i1;TRINITY_DN93289_c0_g2_i1;TRINITY_DN93791_c4_g1_i3	http://www.kegg.jp/kegg-bin/show_pathway?ko00010	11
ko04145	Phagosome	4/926	220/25278	0.962413	0.99998	TRINITY_DN72550_c0_g4_i1;TRINITY_DN72550_c0_g1_i13;TRINITY_DN77266_c0_g5_i1;TRINITY_DN84921_c1_g1_i2	http://www.kegg.jp/kegg-bin/show_pathway?ko04145	4
ko00561	Glycerolipid metabolism	4/926	220/25278	0.962413	0.99998	TRINITY_DN69031_c0_g1_i2;TRINITY_DN72558_c0_g1_i2;TRINITY_DN77879_c0_g3_i4;TRINITY_DN93786_c0_g2_i1	http://www.kegg.jp/kegg-bin/show_pathway?ko00561	4
ko00270	Cysteine and methionine metabolism	7/926	338/25278	0.966327	0.99998	TRINITY_DN72357_c5_g1_i1;TRINITY_DN74587_c0_g1_i1;TRINITY_DN76129_c4_g2_i1;TRINITY_DN79496_c1_g2_i2;TRINITY_DN80028_c0_g2_i1;TRINITY_DN86348_c0_g3_i2;TRINITY_DN86666_c2_g4_i2	http://www.kegg.jp/kegg-bin/show_pathway?ko00270	7
ko05169	Epstein-Barr virus infection	12/926	531/25278	0.975254	0.99998	TRINITY_DN66112_c0_g1_i3;TRINITY_DN70584_c0_g1_i5;TRINITY_DN73495_c1_g2_i3;TRINITY_DN74411_c0_g4_i1;TRINITY_DN74411_c1_g1_i1;TRINITY_DN75969_c0_g1_i3;TRINITY_DN79343_c0_g1_i2;TRINITY_DN79547_c2_g1_i2;TRINITY_DN84779_c0_g2_i2;TRINITY_DN87852_c0_g8_i2;TRINITY_DN93709_c2_g2_i1;TRINITY_DN94852_c2_g1_i13	http://www.kegg.jp/kegg-bin/show_pathway?ko05169	12
ko04139	Mitophagy - yeast	1/926	99/25278	0.975327	0.99998	TRINITY_DN93149_c1_g1_i14	http://www.kegg.jp/kegg-bin/show_pathway?ko04139	1
ko04121	Ubiquitin system	33/926	1246/25278	0.982655	0.99998	TRINITY_DN66791_c1_g1_i1;TRINITY_DN67825_c0_g1_i1;TRINITY_DN68092_c0_g1_i1;TRINITY_DN70558_c0_g1_i2;TRINITY_DN70989_c1_g1_i1;TRINITY_DN70989_c1_g8_i1;TRINITY_DN71113_c0_g1_i2;TRINITY_DN71923_c0_g2_i2;TRINITY_DN72423_c0_g1_i1;TRINITY_DN72423_c1_g1_i2;TRINITY_DN72454_c0_g1_i2;TRINITY_DN72549_c0_g1_i1;TRINITY_DN72519_c0_g1_i1;TRINITY_DN72897_c0_g1_i1;TRINITY_DN74436_c1_g1_i14;TRINITY_DN74875_c0_g2_i…	http://www.kegg.jp/kegg-bin/show_pathway?ko04121	33
ko00770	Pantothenate and CoA biosynthesis	1/926	111/25278	0.984264	0.99998	TRINITY_DN94074_c1_g4_i1	http://www.kegg.jp/kegg-bin/show_pathway?ko00770	1
ko00280	Valine, leucine and isoleucine degradation	2/926	166/25278	0.985308	0.99998	TRINITY_DN67334_c0_g3_i3;TRINITY_DN79690_c2_g2_i8	http://www.kegg.jp/kegg-bin/show_pathway?ko00280	2
ko00020	Citrate cycle (TCA cycle)	3/926	220/25278	0.988242	0.99998	TRINITY_DN77891_c0_g1_i1;TRINITY_DN77891_c1_g1_i5;TRINITY_DN91900_c4_g1_i3	http://www.kegg.jp/kegg-bin/show_pathway?ko00020	3
ko00310	Lysine degradation	1/926	121/25278	0.989184	0.99998	TRINITY_DN90941_c0_g1_i8	http://www.kegg.jp/kegg-bin/show_pathway?ko00310	1
ko00620	Pyruvate metabolism	7/926	395/25278	0.990765	0.99998	TRINITY_DN76098_c0_g3_i1;TRINITY_DN76984_c3_g1_i3;TRINITY_DN77891_c0_g1_i1;TRINITY_DN77891_c1_g1_i5;TRINITY_DN82774_c1_g5_i4;TRINITY_DN85730_c0_g5_i4;TRINITY_DN91900_c4_g1_i3	http://www.kegg.jp/kegg-bin/show_pathway?ko00620	7
ko03008	Ribosome biogenesis in eukaryotes	3/926	231/25278	0.99152	0.99998	TRINITY_DN84444_c1_g6_i2;TRINITY_DN85698_c2_g2_i10;TRINITY_DN95492_c1_g2_i6	http://www.kegg.jp/kegg-bin/show_pathway?ko03008	3
ko03051	Proteasome	4/926	306/25278	0.996411	0.99998	TRINITY_DN74411_c0_g4_i1;TRINITY_DN74411_c1_g1_i1;TRINITY_DN76209_c0_g1_i1;TRINITY_DN79343_c0_g1_i2	http://www.kegg.jp/kegg-bin/show_pathway?ko03051	4
ko03019	Messenger RNA Biogenesis	26/926	1133/25278	0.997017	0.99998	TRINITY_DN68964_c0_g1_i1;TRINITY_DN70135_c0_g2_i3;TRINITY_DN71017_c0_g5_i1;TRINITY_DN71239_c1_g1_i7;TRINITY_DN71323_c1_g3_i5;TRINITY_DN73841_c3_g2_i1;TRINITY_DN74285_c2_g3_i2;TRINITY_DN74285_c2_g5_i2;TRINITY_DN77019_c5_g6_i1;TRINITY_DN77266_c0_g5_i1;TRINITY_DN77451_c0_g4_i1;TRINITY_DN78072_c0_g2_i20;TRINITY_DN81280_c0_g1_i1;TRINITY_DN88985_c2_g4_i3;TRINITY_DN90020_c3_g1_i4;TRINITY_DN90389_c0_g2_i…	http://www.kegg.jp/kegg-bin/show_pathway?ko03019	26
ko01009	Protein phosphatase and associated proteins	13/926	675/25278	0.997096	0.99998	TRINITY_DN70077_c0_g1_i2;TRINITY_DN73205_c1_g2_i5;TRINITY_DN73242_c7_g1_i9;TRINITY_DN74166_c5_g1_i4;TRINITY_DN74411_c0_g4_i1;TRINITY_DN74411_c1_g1_i1;TRINITY_DN74760_c1_g1_i1;TRINITY_DN75913_c2_g1_i8;TRINITY_DN79343_c0_g1_i2;TRINITY_DN80141_c3_g4_i5;TRINITY_DN81260_c0_g5_i1;TRINITY_DN94183_c1_g8_i1;TRINITY_DN96834_c2_g2_i4	http://www.kegg.jp/kegg-bin/show_pathway?ko01009	13
ko04113	Meiosis - yeast	1/926	158/25278	0.997302	0.99998	TRINITY_DN90636_c0_g1_i7	http://www.kegg.jp/kegg-bin/show_pathway?ko04113	1
ko03400	DNA repair and recombination proteins	19/926	904/25278	0.997681	0.99998	TRINITY_DN66112_c0_g1_i3;TRINITY_DN69615_c0_g1_i4;TRINITY_DN70866_c0_g1_i2;TRINITY_DN71261_c4_g2_i1;TRINITY_DN71907_c0_g1_i1;TRINITY_DN74565_c0_g1_i2;TRINITY_DN74852_c5_g5_i1;TRINITY_DN74875_c0_g2_i3;TRINITY_DN76766_c0_g3_i1;TRINITY_DN80148_c0_g1_i3;TRINITY_DN80224_c0_g2_i1;TRINITY_DN85274_c2_g1_i4;TRINITY_DN86986_c0_g1_i1;TRINITY_DN87517_c0_g1_i15;TRINITY_DN88177_c0_g6_i1;TRINITY_DN89469_c0_g2_i…	http://www.kegg.jp/kegg-bin/show_pathway?ko03400	19
ko03040	Spliceosome	10/926	572/25278	0.997719	0.99998	TRINITY_DN68964_c0_g1_i1;TRINITY_DN72656_c0_g1_i14;TRINITY_DN74411_c0_g4_i1;TRINITY_DN74411_c1_g1_i1;TRINITY_DN77451_c0_g4_i1;TRINITY_DN79343_c0_g1_i2;TRINITY_DN80976_c2_g5_i1;TRINITY_DN92776_c1_g2_i1;TRINITY_DN92912_c1_g5_i1;TRINITY_DN97304_c12_g1_i1	http://www.kegg.jp/kegg-bin/show_pathway?ko03040	10
ko03013	RNA transport	7/926	455/25278	0.997893	0.99998	TRINITY_DN68964_c0_g1_i1;TRINITY_DN71323_c1_g3_i5;TRINITY_DN77451_c0_g4_i1;TRINITY_DN80028_c0_g1_i2;TRINITY_DN88985_c2_g4_i3;TRINITY_DN92912_c1_g5_i1;TRINITY_DN95909_c3_g2_i2	http://www.kegg.jp/kegg-bin/show_pathway?ko03013	7
ko03050	Proteasome	1/926	167/25278	0.998076	0.99998	TRINITY_DN76209_c0_g1_i1	http://www.kegg.jp/kegg-bin/show_pathway?ko03050	1
ko05016	Huntington's disease	4/926	330/25278	0.998213	0.99998	TRINITY_DN66112_c0_g1_i3;TRINITY_DN70584_c0_g1_i5;TRINITY_DN71332_c0_g1_i2;TRINITY_DN96836_c2_g2_i7	http://www.kegg.jp/kegg-bin/show_pathway?ko05016	4
ko03016	Transfer RNA biogenesis	14/926	737/25278	0.998277	0.99998	TRINITY_DN71323_c1_g3_i5;TRINITY_DN71529_c0_g1_i5;TRINITY_DN77340_c1_g4_i2;TRINITY_DN80449_c10_g1_i4;TRINITY_DN80655_c2_g4_i2;TRINITY_DN82151_c10_g1_i1;TRINITY_DN84349_c1_g1_i1;TRINITY_DN86381_c2_g10_i1;TRINITY_DN87659_c0_g1_i4;TRINITY_DN91361_c6_g1_i5;TRINITY_DN93264_c2_g4_i1;TRINITY_DN93850_c5_g1_i5;TRINITY_DN96069_c6_g1_i2;TRINITY_DN96624_c3_g1_i7	http://www.kegg.jp/kegg-bin/show_pathway?ko03016	14
ko03009	Ribosome biogenesis	16/926	820/25278	0.998567	0.99998	TRINITY_DN73122_c0_g5_i3;TRINITY_DN74411_c0_g4_i1;TRINITY_DN74411_c1_g1_i1;TRINITY_DN75171_c0_g4_i1;TRINITY_DN75244_c0_g2_i3;TRINITY_DN79343_c0_g1_i2;TRINITY_DN81523_c5_g2_i8;TRINITY_DN81997_c0_g1_i1;TRINITY_DN82350_c1_g1_i1;TRINITY_DN82890_c2_g4_i1;TRINITY_DN84444_c1_g6_i2;TRINITY_DN85698_c2_g2_i10;TRINITY_DN87340_c1_g5_i1;TRINITY_DN87718_c5_g4_i3;TRINITY_DN94684_c1_g1_i3;TRINITY_DN95492_c1_g2_i6	http://www.kegg.jp/kegg-bin/show_pathway?ko03009	16
ko05012	Parkinson's disease	2/926	237/25278	0.998605	0.99998	TRINITY_DN71332_c0_g1_i2;TRINITY_DN72519_c0_g1_i1	http://www.kegg.jp/kegg-bin/show_pathway?ko05012	2
ko01007	Amino acid related enzymes	4/926	349/25278	0.998981	0.99998	TRINITY_DN74587_c0_g1_i1;TRINITY_DN80028_c0_g2_i1;TRINITY_DN80655_c2_g4_i2;TRINITY_DN86184_c0_g1_i7	http://www.kegg.jp/kegg-bin/show_pathway?ko01007	4
ko02044	Secretion system	1/926	184/25278	0.998985	0.99998	TRINITY_DN82972_c4_g1_i2	http://www.kegg.jp/kegg-bin/show_pathway?ko02044	1
ko03029	Mitochondrial biogenesis	27/926	1245/25278	0.999225	0.99998	TRINITY_DN70584_c0_g1_i5;TRINITY_DN71332_c0_g1_i2;TRINITY_DN72861_c3_g2_i2;TRINITY_DN74411_c0_g4_i1;TRINITY_DN74411_c1_g1_i1;TRINITY_DN74802_c4_g3_i1;TRINITY_DN76659_c4_g1_i1;TRINITY_DN78742_c2_g2_i1;TRINITY_DN79343_c0_g1_i2;TRINITY_DN81757_c2_g1_i6;TRINITY_DN82151_c10_g1_i1;TRINITY_DN82498_c0_g4_i1;TRINITY_DN82498_c0_g2_i4;TRINITY_DN82498_c1_g1_i6;TRINITY_DN82498_c1_g5_i1;TRINITY_DN82498_c1_g9_i…	http://www.kegg.jp/kegg-bin/show_pathway?ko03029	27
ko00030	Pentose phosphate pathway	1/926	196/25278	0.999353	0.99998	TRINITY_DN68250_c0_g3_i1	http://www.kegg.jp/kegg-bin/show_pathway?ko00030	1
ko00240	Pyrimidine metabolism	5/926	414/25278	0.9994	0.99998	TRINITY_DN53516_c0_g1_i1;TRINITY_DN66112_c0_g1_i3;TRINITY_DN74852_c5_g5_i1;TRINITY_DN80616_c0_g3_i2;TRINITY_DN83494_c5_g7_i1	http://www.kegg.jp/kegg-bin/show_pathway?ko00240	5
ko00230	Purine metabolism	8/926	549/25278	0.999447	0.99998	TRINITY_DN66112_c0_g1_i3;TRINITY_DN72908_c0_g1_i9;TRINITY_DN74311_c0_g3_i13;TRINITY_DN74852_c5_g5_i1;TRINITY_DN76984_c3_g1_i3;TRINITY_DN83494_c5_g7_i1;TRINITY_DN84703_c6_g1_i1;TRINITY_DN95781_c1_g4_i3	http://www.kegg.jp/kegg-bin/show_pathway?ko00230	8
ko03010	Ribosome	14/926	802/25278	0.999583	0.99998	TRINITY_DN12359_c0_g1_i1;TRINITY_DN67158_c0_g2_i2;TRINITY_DN69121_c0_g1_i1;TRINITY_DN71380_c6_g5_i1;TRINITY_DN81411_c0_g5_i1;TRINITY_DN82289_c2_g1_i6;TRINITY_DN84901_c3_g3_i1;TRINITY_DN88861_c1_g1_i6;TRINITY_DN89733_c0_g6_i3;TRINITY_DN90274_c1_g2_i1;TRINITY_DN90274_c1_g8_i1;TRINITY_DN91831_c0_g2_i1;TRINITY_DN95838_c1_g2_i1;TRINITY_DN162853_c0_g1_i1	http://www.kegg.jp/kegg-bin/show_pathway?ko03010	14
ko02020	Two-component system	1/926	219/25278	0.999728	0.99998	TRINITY_DN68555_c0_g1_i2	http://www.kegg.jp/kegg-bin/show_pathway?ko02020	1
ko03011	Ribosome	14/926	824/25278	0.999747	0.99998	TRINITY_DN12359_c0_g1_i1;TRINITY_DN67158_c0_g2_i2;TRINITY_DN69121_c0_g1_i1;TRINITY_DN71380_c6_g5_i1;TRINITY_DN81411_c0_g5_i1;TRINITY_DN82289_c2_g1_i6;TRINITY_DN84901_c3_g3_i1;TRINITY_DN88861_c1_g1_i6;TRINITY_DN89733_c0_g6_i3;TRINITY_DN90274_c1_g2_i1;TRINITY_DN90274_c1_g8_i1;TRINITY_DN91831_c0_g2_i1;TRINITY_DN95838_c1_g2_i1;TRINITY_DN162853_c0_g1_i1	http://www.kegg.jp/kegg-bin/show_pathway?ko03011	14
ko00970	Aminoacyl-tRNA biosynthesis	1/926	246/25278	0.999902	0.99998	TRINITY_DN80655_c2_g4_i2	http://www.kegg.jp/kegg-bin/show_pathway?ko00970	1
ko03015	mRNA surveillance pathway	2/926	321/25278	0.999922	0.99998	TRINITY_DN68964_c0_g1_i1;TRINITY_DN77019_c5_g6_i1	http://www.kegg.jp/kegg-bin/show_pathway?ko03015	2
ko03012	Translation factors	5/926	507/25278	0.999962	0.99998	TRINITY_DN71323_c1_g3_i5;TRINITY_DN71442_c0_g2_i1;TRINITY_DN80028_c0_g1_i2;TRINITY_DN88985_c2_g4_i3;TRINITY_DN89142_c2_g3_i2	http://www.kegg.jp/kegg-bin/show_pathway?ko03012	5
ko00190	Oxidative phosphorylation	3/926	408/25278	0.99997	0.99998	TRINITY_DN69775_c1_g1_i1;TRINITY_DN81207_c1_g1_i8;TRINITY_DN83913_c3_g5_i1	http://www.kegg.jp/kegg-bin/show_pathway?ko00190	3
ko03041	Spliceosome	16/926	1011/25278	0.99998	0.99998	TRINITY_DN68964_c0_g1_i1;TRINITY_DN72225_c1_g1_i3;TRINITY_DN72656_c0_g1_i14;TRINITY_DN74411_c0_g4_i1;TRINITY_DN74411_c1_g1_i1;TRINITY_DN77451_c0_g4_i1;TRINITY_DN79343_c0_g1_i2;TRINITY_DN80976_c2_g5_i1;TRINITY_DN81011_c0_g2_i4;TRINITY_DN82504_c0_g1_i7;TRINITY_DN85707_c0_g5_i1;TRINITY_DN86750_c0_g2_i4;TRINITY_DN90704_c2_g1_i6;TRINITY_DN92776_c1_g2_i1;TRINITY_DN92912_c1_g5_i1;TRINITY_DN97304_c12_g1_…	http://www.kegg.jp/kegg-bin/show_pathway?ko03041	16
