# Supplementary material for: Overexpression of Lol-miR11467 negatively affects osmotic resistance in Larix kaempferi 3 × L. gmelinii 9
Source: BMC Plant Biol. 2025 May 6;25:592. doi: 10.1186/s12870-025-06591-x (PMC12054245; doi:10.1186/s12870-025-06591-x)
Supplement: Supplementary file 15 — Supplementary Material 15 [file 12870_2025_6591_MOESM15_ESM.xlsx]

## Sheet: Sheet1
Table S12 The prediction of target genes in Lol-miR11467
Lol-miR11467 mature sequence	Target gene ID	Comparison rate	Annotation	Regulation	Alignment
guggcuggaaaacuuauugaag	TRINITY_DN78358_c2_g2_i1	0.8824	trafficking protein particle complex subunit 2	down
guggcuggaaaacuuauugaag	TRINITY_DN76273_c0_g3_i5	0.8947	Leucine-rich repeat receptor-like protein kinase PXC2	down
guggcuggaaaacuuauugaag	TRINITY_DN87896_c2_g1_i9	0.85	zinc finger CCCH domain-containing protein 6 isoform X2	down
guggcuggaaaacuuauugaag	TRINITY_DN95853_c3_g3_i1	0.85	Shaggy-related protein kinase eta	down
Target1: TRINITY_DN78358_c2_g2_i1
Target2: TRINITY_DN76273_c0_g3_i5
Target3: TRINITY_DN87896_c2_g1_i9
Target4: TRINITY_DN95853_c3_g3_i1
