# Supplementary material for: Overexpression of Lol-miR11467 negatively affects osmotic resistance in Larix kaempferi 3 × L. gmelinii 9
Source: BMC Plant Biol. 2025 May 6;25:592. doi: 10.1186/s12870-025-06591-x (PMC12054245; doi:10.1186/s12870-025-06591-x)
Supplement: Supplementary file 16 — Supplementary Material 16 [file 12870_2025_6591_MOESM16_ESM.xlsx]

## Sheet: Sheet1
Table S13 The primers used for qRT-PCR of predicted target genes in Lol-miR11467
Gene ID	Forward primer (5'-3')	Reverse primer (5'-3')
TRINITY_DN78358_c2_g2_i1	CCAACTATTTTTGGCATCCTTG	GGCTGGAAAATGTATTTGCTG
TRINITY_DN76273_c0_g3_i5	GAAGCTGAGAGCTGTAGAGTGATAG	ACCATCAGAAAAACTGCAACTG
TRINITY_DN87896_c2_g1_i9	CAAGTCTTTTTTATTGGGCGG	CATATAATGGGTCCTGTTATATCCC
TRINITY_DN95853_c3_g3_i1	CCCTCTACCCCTTCTTTTCAAC	GAGACAATCACAGAAAAACCAACAT
EF-1	GACTGTACCTGTTGGTCGTG	CCTCCAGCAGAGCTTCAT
