# Supplementary material for: Overexpression of Lol-miR11467 negatively affects osmotic resistance in Larix kaempferi 3 × L. gmelinii 9
Source: BMC Plant Biol. 2025 May 6;25:592. doi: 10.1186/s12870-025-06591-x (PMC12054245; doi:10.1186/s12870-025-06591-x)
Supplement: Supplementary file 17 — Supplementary Material 17 [file 12870_2025_6591_MOESM17_ESM.xlsx]

## Sheet: Sheet1
Table S14 Downregulated DEGs annotated as unknown function
Gene ID	Accession No.	Annotation
TRINITY_DN89301_c0_g3_i2	ABK23358.1	ABK23358.1 unknown [Picea sitchensis]
TRINITY_DN68130_c0_g1_i2	ABK21631.1	ABK21631.1 unknown [Picea sitchensis]
TRINITY_DN78649_c2_g4_i4	ABK22901.1	ABK22901.1 unknown [Picea sitchensis]
TRINITY_DN88758_c0_g6_i1	ABR18056.1	ABR18056.1 unknown [Picea sitchensis]
TRINITY_DN91788_c0_g1_i1	ABR17480.1	ABR17480.1 unknown [Picea sitchensis]
TRINITY_DN92559_c1_g3_i1	ABR17623.1	ABR17623.1 unknown [Picea sitchensis]
TRINITY_DN89544_c1_g3_i1	ADE75918.1	ADE75918.1 unknown [Picea sitchensis]
TRINITY_DN78058_c1_g2_i3	ABR18096.1	ABR18096.1 unknown [Picea sitchensis]
TRINITY_DN94867_c0_g8_i1	ABK24976.1	ABK24976.1 unknown [Picea sitchensis]
TRINITY_DN96416_c2_g4_i2	ABR18194.1	ABR18194.1 unknown [Picea sitchensis]
TRINITY_DN70721_c0_g5_i1	ACN41160.1	ACN41160.1 unknown [Picea sitchensis]
TRINITY_DN79196_c0_g2_i2	ABK22889.1	ABK22889.1 unknown [Picea sitchensis]
TRINITY_DN93153_c1_g5_i1	ABR16787.1	ABR16787.1 unknown [Picea sitchensis]
TRINITY_DN79846_c2_g4_i2	ABK26619.1	ABK26619.1 unknown [Picea sitchensis]
TRINITY_DN90760_c3_g1_i1	ABR18209.1	ABR18209.1 unknown [Picea sitchensis]
TRINITY_DN85848_c2_g6_i1	ABR18376.1	ABR18376.1 unknown [Picea sitchensis]
TRINITY_DN72220_c0_g3_i3	ABR16806.1	ABR16806.1 unknown [Picea sitchensis]
TRINITY_DN90408_c0_g6_i1	ABR16191.1	ABR16191.1 unknown [Picea sitchensis]
TRINITY_DN88817_c0_g5_i1	ABK25758.1	ABK25758.1 unknown [Picea sitchensis]
TRINITY_DN76261_c0_g2_i1	ABK23288.1	ABK23288.1 unknown [Picea sitchensis]
TRINITY_DN71509_c0_g4_i1	ABK25064.1	ABK25064.1 unknown [Picea sitchensis]
TRINITY_DN88441_c10_g1_i1	ABR16429.1	ABR16429.1 unknown [Picea sitchensis]
TRINITY_DN81149_c2_g2_i1	ABK22451.1	ABK22451.1 unknown [Picea sitchensis]
TRINITY_DN83215_c2_g2_i3	ABR18023.1	ABR18023.1 unknown [Picea sitchensis]
TRINITY_DN90497_c2_g4_i4	ABR16526.1	ABR16526.1 unknown [Picea sitchensis]
TRINITY_DN79822_c2_g8_i1	ABR18402.1	ABR18402.1 unknown [Picea sitchensis]
TRINITY_DN71607_c0_g4_i1	ADE75680.1	ADE75680.1 unknown [Picea sitchensis]
TRINITY_DN96416_c2_g3_i1	ACN40032.1	ACN40032.1 unknown [Picea sitchensis]
TRINITY_DN79160_c3_g5_i1	ABR18209.1	ABR18209.1 unknown [Picea sitchensis]
TRINITY_DN65440_c0_g2_i1	ABK23046.1	ABK23046.1 unknown [Picea sitchensis]
TRINITY_DN82352_c0_g3_i1	ABR17027.1	ABR17027.1 unknown [Picea sitchensis]
TRINITY_DN77023_c7_g1_i6	ABR16869.1	ABR16869.1 unknown [Picea sitchensis]
TRINITY_DN94145_c4_g1_i4	ABK24819.1	ABK24819.1 unknown [Picea sitchensis]
TRINITY_DN82697_c2_g3_i1	ABK25396.1	ABK25396.1 unknown [Picea sitchensis]
TRINITY_DN79958_c2_g1_i1	ABK23938.1	ABK23938.1 unknown [Picea sitchensis]
TRINITY_DN72825_c0_g2_i1	ABR18053.1	ABR18053.1 unknown [Picea sitchensis]
TRINITY_DN88612_c2_g2_i4	ACN39857.1	ACN39857.1 unknown [Picea sitchensis]
TRINITY_DN89895_c2_g2_i1	ADE77579.1	ADE77579.1 unknown [Picea sitchensis]
TRINITY_DN41215_c0_g1_i1	ABK25881.1	ABK25881.1 unknown [Picea sitchensis]
TRINITY_DN71598_c2_g4_i6	ABK23956.1	ABK23956.1 unknown [Picea sitchensis]
TRINITY_DN95317_c0_g12_i2	ABR16629.1	ABR16629.1 unknown [Picea sitchensis]
TRINITY_DN85312_c0_g4_i1	ABR16485.1	ABR16485.1 unknown [Picea sitchensis]
TRINITY_DN83800_c0_g1_i9	ACN40875.1	ACN40875.1 unknown [Picea sitchensis]
TRINITY_DN66753_c1_g1_i4	ABR17785.1	ABR17785.1 unknown [Picea sitchensis]
TRINITY_DN93046_c3_g2_i6	ADE76409.1	ADE76409.1 unknown [Picea sitchensis]
TRINITY_DN79995_c1_g1_i15	ABK22983.1	ABK22983.1 unknown [Picea sitchensis]
TRINITY_DN81916_c7_g2_i4	ABK27152.1	ABK27152.1 unknown [Picea sitchensis]
TRINITY_DN88507_c1_g3_i1	ABK27038.1	ABK27038.1 unknown [Picea sitchensis]
TRINITY_DN61755_c0_g1_i1	ABR16814.1	ABR16814.1 unknown [Picea sitchensis]
TRINITY_DN86932_c0_g2_i2	ABK24579.1	ABK24579.1 unknown [Picea sitchensis]
TRINITY_DN91998_c0_g1_i3	ABR17814.1	ABR17814.1 unknown [Picea sitchensis]
TRINITY_DN91273_c6_g1_i3	ABR16067.1	ABR16067.1 unknown [Picea sitchensis]
TRINITY_DN76731_c6_g2_i3	ABK26540.1	ABK26540.1 unknown [Picea sitchensis]
TRINITY_DN85193_c1_g1_i5	ACN41008.1	ACN41008.1 unknown [Picea sitchensis]
TRINITY_DN90635_c0_g1_i4	ABK27056.1	ABK27056.1 unknown [Picea sitchensis]
TRINITY_DN93289_c0_g2_i1	ABK25905.1	ABK25905.1 unknown [Picea sitchensis]
TRINITY_DN95169_c2_g2_i14	ACN41071.1	ACN41071.1 unknown [Picea sitchensis]
TRINITY_DN88699_c2_g6_i3	ADE76305.1	ADE76305.1 unknown [Picea sitchensis]
TRINITY_DN85123_c0_g3_i2	ABK21195.1	ABK21195.1 unknown [Picea sitchensis]
TRINITY_DN72362_c0_g1_i2	ADE76835.1	ADE76835.1 unknown [Picea sitchensis]
TRINITY_DN71295_c0_g2_i2	ACN40219.1	ACN40219.1 unknown [Picea sitchensis]
TRINITY_DN70014_c0_g1_i2	ABK23046.1	ABK23046.1 unknown [Picea sitchensis]
TRINITY_DN86267_c2_g2_i5	ABK22302.1	ABK22302.1 unknown [Picea sitchensis]
TRINITY_DN87470_c1_g5_i4	ABR18194.1	ABR18194.1 unknown [Picea sitchensis]
TRINITY_DN90506_c2_g1_i2	ABR17476.1	ABR17476.1 unknown [Picea sitchensis]
TRINITY_DN94563_c1_g4_i4	ABK26674.1	ABK26674.1 unknown [Picea sitchensis]
TRINITY_DN77162_c4_g1_i3	ADE76870.1	ADE76870.1 unknown [Picea sitchensis]
TRINITY_DN89551_c1_g4_i2	ABK24911.1	ABK24911.1 unknown [Picea sitchensis]
TRINITY_DN75712_c0_g4_i1	ABK24844.1	ABK24844.1 unknown [Picea sitchensis]
TRINITY_DN72450_c1_g5_i2	ABK21572.1	ABK21572.1 unknown [Picea sitchensis]
TRINITY_DN81997_c0_g1_i1	ABK23952.1	ABK23952.1 unknown [Picea sitchensis]
TRINITY_DN83910_c4_g3_i5	ABK24867.1	ABK24867.1 unknown [Picea sitchensis]
TRINITY_DN85747_c2_g1_i17	ADE75649.1	ADE75649.1 unknown [Picea sitchensis]
TRINITY_DN74358_c9_g6_i1	ADE75643.1	ADE75643.1 unknown [Picea sitchensis]
TRINITY_DN76557_c0_g2_i4	ADE77658.1	ADE77658.1 unknown [Picea sitchensis]
TRINITY_DN88544_c0_g3_i4	ABK24540.1	ABK24540.1 unknown [Picea sitchensis]
TRINITY_DN82126_c1_g1_i10	ABK23285.1	ABK23285.1 unknown [Picea sitchensis]
TRINITY_DN95187_c0_g4_i1	ABK24215.1	ABK24215.1 unknown [Picea sitchensis]
TRINITY_DN94594_c0_g3_i1	ABR16696.1	ABR16696.1 unknown [Picea sitchensis]
TRINITY_DN92451_c0_g2_i5	ABK27056.1	ABK27056.1 unknown [Picea sitchensis]
TRINITY_DN82708_c1_g1_i5	ABK23302.1	ABK23302.1 unknown [Picea sitchensis]
TRINITY_DN69474_c0_g3_i1	ABK24217.1	ABK24217.1 unknown [Picea sitchensis]
TRINITY_DN77325_c2_g1_i5	ABK22915.1	ABK22915.1 unknown [Picea sitchensis]
TRINITY_DN83177_c1_g1_i24	ABR18241.1	ABR18241.1 unknown [Picea sitchensis]
TRINITY_DN72881_c1_g4_i2	ACN41041.1	ACN41041.1 unknown [Picea sitchensis]
TRINITY_DN71274_c2_g1_i2	ACN40341.1	ACN40341.1 unknown [Picea sitchensis]
TRINITY_DN74526_c0_g2_i9	ABK25083.1	ABK25083.1 unknown [Picea sitchensis]
TRINITY_DN93124_c1_g4_i1	ABR17809.1	ABR17809.1 unknown [Picea sitchensis]
TRINITY_DN88817_c0_g3_i1	ABK25758.1	ABK25758.1 unknown [Picea sitchensis]
TRINITY_DN81535_c0_g5_i1	ABK21023.1	ABK21023.1 unknown [Picea sitchensis]
TRINITY_DN96407_c2_g4_i2	ABR17786.1	ABR17786.1 unknown [Picea sitchensis]
TRINITY_DN71562_c3_g1_i1	ABR16407.1	ABR16407.1 unknown [Picea sitchensis]
TRINITY_DN77372_c0_g2_i4	ACN39861.1	ACN39861.1 unknown [Picea sitchensis]
TRINITY_DN81757_c2_g1_i6	ADE77340.1	ADE77340.1 unknown [Picea sitchensis]
TRINITY_DN93027_c0_g1_i3	ABK21062.1	ABK21062.1 unknown [Picea sitchensis]
TRINITY_DN86217_c2_g6_i2	ABK23583.1	ABK23583.1 unknown [Picea sitchensis]
TRINITY_DN90572_c0_g1_i1	ADE77007.1	ADE77007.1 unknown [Picea sitchensis]
TRINITY_DN73033_c0_g3_i1	ADE76365.1	ADE76365.1 unknown [Picea sitchensis]
TRINITY_DN89895_c2_g5_i6	ABR17222.1	ABR17222.1 unknown [Picea sitchensis]
TRINITY_DN72423_c1_g1_i2	ABK24745.1	ABK24745.1 unknown [Picea sitchensis]
TRINITY_DN69851_c0_g1_i4	ABK24131.1	ABK24131.1 unknown [Picea sitchensis]
TRINITY_DN82103_c3_g1_i7	ABK25095.1	ABK25095.1 unknown [Picea sitchensis]
TRINITY_DN92195_c1_g6_i1	ABK25811.1	ABK25811.1 unknown [Picea sitchensis]
TRINITY_DN74832_c0_g1_i2	ADE77335.1	ADE77335.1 unknown [Picea sitchensis]
TRINITY_DN73001_c0_g1_i1	ABR17205.1	ABR17205.1 unknown [Picea sitchensis]
TRINITY_DN77722_c2_g4_i6	ABK24890.1	ABK24890.1 unknown [Picea sitchensis]
TRINITY_DN72838_c0_g1_i11	ADE76152.1	ADE76152.1 unknown [Picea sitchensis]
TRINITY_DN88085_c0_g2_i1	ADE77445.1	ADE77445.1 unknown [Picea sitchensis]
TRINITY_DN83614_c0_g1_i21	ADE75914.1	ADE75914.1 unknown [Picea sitchensis]
TRINITY_DN72482_c0_g2_i1	ABR18365.1	ABR18365.1 unknown [Picea sitchensis]
TRINITY_DN72220_c0_g4_i5	ABR16806.1	ABR16806.1 unknown [Picea sitchensis]
TRINITY_DN77749_c1_g7_i1	ACN40652.1	ACN40652.1 unknown [Picea sitchensis]
TRINITY_DN76579_c2_g1_i1	ADE76436.1	ADE76436.1 unknown [Picea sitchensis]
TRINITY_DN82884_c2_g2_i3	ABK26600.1	ABK26600.1 unknown [Picea sitchensis]
TRINITY_DN74063_c0_g4_i1	ABK26774.1	ABK26774.1 unknown [Picea sitchensis]
TRINITY_DN67650_c0_g1_i3	ABK22227.1	ABK22227.1 unknown [Picea sitchensis]
TRINITY_DN84350_c0_g1_i2	ACN40383.1	ACN40383.1 unknown [Picea sitchensis]
TRINITY_DN77183_c1_g6_i2	ABK21054.1	ABK21054.1 unknown [Picea sitchensis]
TRINITY_DN72714_c0_g2_i1	ADE76727.1	ADE76727.1 unknown [Picea sitchensis]
TRINITY_DN93537_c3_g2_i9	ABK21133.1	ABK21133.1 unknown [Picea sitchensis]
TRINITY_DN78714_c0_g2_i1	ADE77593.1	ADE77593.1 unknown [Picea sitchensis]
TRINITY_DN89202_c1_g2_i1	ACN40311.1	ACN40311.1 unknown [Picea sitchensis]
TRINITY_DN73187_c0_g9_i1	ABR17484.1	ABR17484.1 unknown [Picea sitchensis]
TRINITY_DN91793_c1_g1_i7	ADE76177.1	ADE76177.1 unknown [Picea sitchensis]
TRINITY_DN82530_c2_g1_i3	ABK25921.1	ABK25921.1 unknown [Picea sitchensis]
TRINITY_DN73326_c0_g2_i7	ABK26902.1	ABK26902.1 unknown [Picea sitchensis]
TRINITY_DN72423_c0_g1_i1	ABK24745.1	ABK24745.1 unknown [Picea sitchensis]
TRINITY_DN92264_c4_g2_i2	ABR18194.1	ABR18194.1 unknown [Picea sitchensis]
TRINITY_DN63557_c0_g1_i1	ABK22692.1	ABK22692.1 unknown [Picea sitchensis]
TRINITY_DN88049_c3_g4_i1	ABK20922.1	ABK20922.1 unknown [Picea sitchensis]
TRINITY_DN86518_c2_g7_i1	ABK22904.1	ABK22904.1 unknown [Picea sitchensis]
TRINITY_DN94031_c1_g3_i2	ABR16971.1	ABR16971.1 unknown [Picea sitchensis]
TRINITY_DN89855_c0_g6_i2	ADE77718.1	ADE77718.1 unknown [Picea sitchensis]
TRINITY_DN72578_c0_g2_i2	ADE76876.1	ADE76876.1 unknown [Picea sitchensis]
TRINITY_DN75662_c6_g1_i1	ACN40583.1	ACN40583.1 unknown [Picea sitchensis]
TRINITY_DN91952_c0_g1_i4	ABR16102.1	ABR16102.1 unknown [Picea sitchensis]
TRINITY_DN84538_c0_g3_i1	ADE77780.1	ADE77780.1 unknown [Picea sitchensis]
TRINITY_DN80806_c0_g1_i7	ABK21760.1	ABK21760.1 unknown [Picea sitchensis]
TRINITY_DN84020_c3_g3_i4	ACN41111.1	ACN41111.1 unknown [Picea sitchensis]
TRINITY_DN77344_c1_g6_i1	ABK22404.1	ABK22404.1 unknown [Picea sitchensis]
TRINITY_DN75338_c0_g1_i1	ACN40130.1	ACN40130.1 unknown [Picea sitchensis]
TRINITY_DN89937_c1_g9_i1	ABK21056.1	ABK21056.1 unknown [Picea sitchensis]
TRINITY_DN69229_c0_g1_i1	ABR17355.1	ABR17355.1 unknown [Picea sitchensis]
TRINITY_DN79602_c0_g10_i3	ABK21764.1	ABK21764.1 unknown [Picea sitchensis]
TRINITY_DN90935_c6_g1_i4	ABK26521.1	ABK26521.1 unknown [Picea sitchensis]
TRINITY_DN81643_c0_g1_i2	ABK22252.1	ABK22252.1 unknown [Picea sitchensis]
TRINITY_DN66450_c0_g1_i2	ABK24454.1	ABK24454.1 unknown [Picea sitchensis]
TRINITY_DN54270_c0_g1_i3	ABK21251.1	ABK21251.1 unknown [Picea sitchensis]
TRINITY_DN76729_c0_g5_i2	ABK22641.1	ABK22641.1 unknown [Picea sitchensis]
TRINITY_DN91550_c1_g3_i2	ADE77313.1	ADE77313.1 unknown [Picea sitchensis]
TRINITY_DN95437_c4_g1_i5	ADE77593.1	ADE77593.1 unknown [Picea sitchensis]
TRINITY_DN91550_c1_g7_i1	ADE77313.1	ADE77313.1 unknown [Picea sitchensis]
TRINITY_DN76105_c1_g2_i2	ABK26504.1	ABK26504.1 unknown [Picea sitchensis]
TRINITY_DN75224_c2_g2_i1	ABK21013.1	ABK21013.1 unknown [Picea sitchensis]
TRINITY_DN83160_c0_g1_i8	ABK23938.1	ABK23938.1 unknown [Picea sitchensis]
TRINITY_DN92269_c0_g3_i1	ABK21061.1	ABK21061.1 unknown [Picea sitchensis]
TRINITY_DN93153_c1_g1_i8	ABR16787.1	ABR16787.1 unknown [Picea sitchensis]
TRINITY_DN77449_c4_g1_i3	ABK22098.1	ABK22098.1 unknown [Picea sitchensis]
TRINITY_DN89151_c0_g1_i9	ADE76269.1	ADE76269.1 unknown [Picea sitchensis]
TRINITY_DN82953_c1_g1_i7	ABK24434.1	ABK24434.1 unknown [Picea sitchensis]
TRINITY_DN91672_c2_g1_i2	ABR16112.1	ABR16112.1 unknown [Picea sitchensis]
TRINITY_DN89301_c1_g7_i1	ABK23358.1	ABK23358.1 unknown [Picea sitchensis]
TRINITY_DN87305_c2_g2_i1	ABK24596.1	ABK24596.1 unknown [Picea sitchensis]
TRINITY_DN84346_c4_g2_i4	ABR17027.1	ABR17027.1 unknown [Picea sitchensis]
TRINITY_DN65976_c0_g1_i2	ABK22890.1	ABK22890.1 unknown [Picea sitchensis]
TRINITY_DN62173_c0_g1_i1	ABK24509.1	ABK24509.1 unknown [Picea sitchensis]
TRINITY_DN90704_c2_g1_i6	ABR16055.1	ABR16055.1 unknown [Picea sitchensis]
TRINITY_DN83148_c3_g3_i1	ABK21062.1	ABK21062.1 unknown [Picea sitchensis]
TRINITY_DN90738_c2_g2_i4	ABK22915.1	ABK22915.1 unknown [Picea sitchensis]
TRINITY_DN76557_c0_g5_i1	ABK24620.1	ABK24620.1 unknown [Picea sitchensis]
TRINITY_DN76479_c1_g6_i2	ABR17496.1	ABR17496.1 unknown [Picea sitchensis]
TRINITY_DN71913_c0_g1_i1	ADE76437.1	ADE76437.1 unknown [Picea sitchensis]
TRINITY_DN96270_c5_g1_i7	ABK23987.1	ABK23987.1 unknown [Picea sitchensis]
TRINITY_DN65237_c0_g1_i1	ABK21934.1	ABK21934.1 unknown [Picea sitchensis]
TRINITY_DN84959_c0_g2_i5	ABK21448.1	ABK21448.1 unknown [Picea sitchensis]
TRINITY_DN90195_c0_g3_i1	ADE76020.1	ADE76020.1 unknown [Picea sitchensis]
TRINITY_DN87820_c0_g6_i1	ABK23671.1	ABK23671.1 unknown [Picea sitchensis]
TRINITY_DN83541_c0_g2_i3	ABR17626.1	ABR17626.1 unknown [Picea sitchensis]
TRINITY_DN72403_c0_g2_i1	ABK23026.1	ABK23026.1 unknown [Picea sitchensis]
TRINITY_DN80976_c2_g5_i1	ABK25797.1	ABK25797.1 unknown [Picea sitchensis]
TRINITY_DN82350_c1_g1_i1	ADE76484.1	ADE76484.1 unknown [Picea sitchensis]
TRINITY_DN79455_c2_g3_i3	ADE77884.1	ADE77884.1 unknown [Picea sitchensis]
TRINITY_DN71607_c0_g1_i7	ADE75680.1	ADE75680.1 unknown [Picea sitchensis]
TRINITY_DN85631_c4_g1_i1	ADE76575.1	ADE76575.1 unknown [Picea sitchensis]
TRINITY_DN82708_c1_g3_i1	ABK23302.1	ABK23302.1 unknown [Picea sitchensis]
TRINITY_DN93153_c1_g4_i1	ABR16787.1	ABR16787.1 unknown [Picea sitchensis]
TRINITY_DN91428_c1_g5_i1	ABK23498.1	ABK23498.1 unknown [Picea sitchensis]
TRINITY_DN70676_c0_g2_i1	ABK23726.1	ABK23726.1 unknown [Picea sitchensis]
TRINITY_DN96244_c10_g3_i1	ABR16526.1	ABR16526.1 unknown [Picea sitchensis]
TRINITY_DN75578_c0_g2_i1	ABR18096.1	ABR18096.1 unknown [Picea sitchensis]
TRINITY_DN88013_c3_g8_i1	ABK21374.1	ABK21374.1 unknown [Picea sitchensis]
TRINITY_DN92745_c1_g1_i1	ADE77495.1	ADE77495.1 unknown [Picea sitchensis]
TRINITY_DN79261_c3_g2_i2	ABR16440.1	ABR16440.1 unknown [Picea sitchensis]
TRINITY_DN95551_c2_g2_i5	ABK21909.1	ABK21909.1 unknown [Picea sitchensis]
TRINITY_DN88057_c2_g4_i1	ABK25758.1	ABK25758.1 unknown [Picea sitchensis]
TRINITY_DN85716_c0_g1_i22	ABR16316.1	ABR16316.1 unknown [Picea sitchensis]
TRINITY_DN92474_c2_g8_i1	ACN40981.1	ACN40981.1 unknown [Picea sitchensis]
TRINITY_DN48969_c0_g1_i1	ABK24469.1	ABK24469.1 unknown [Picea sitchensis]
TRINITY_DN44030_c0_g1_i1	ABK24785.1	ABK24785.1 unknown [Picea sitchensis]
TRINITY_DN87693_c1_g1_i4	ABK22850.1	ABK22850.1 unknown [Picea sitchensis]
TRINITY_DN83527_c2_g2_i3	ABK22146.1	ABK22146.1 unknown [Picea sitchensis]
TRINITY_DN90401_c1_g2_i3	ADE77434.1	ADE77434.1 unknown [Picea sitchensis]
TRINITY_DN72557_c0_g5_i1	ACN40873.1	ACN40873.1 unknown [Picea sitchensis]
TRINITY_DN79663_c1_g4_i1	ABR17632.1	ABR17632.1 unknown [Picea sitchensis]
TRINITY_DN95722_c16_g1_i3	ABK21351.1	ABK21351.1 unknown [Picea sitchensis]
TRINITY_DN82498_c1_g5_i1	ADE77340.1	ADE77340.1 unknown [Picea sitchensis]
TRINITY_DN69766_c0_g2_i1	ABR16491.1	ABR16491.1 unknown [Picea sitchensis]
TRINITY_DN88070_c0_g1_i1	ABK21708.1	ABK21708.1 unknown [Picea sitchensis]
TRINITY_DN89738_c1_g1_i1	ADE76350.1	ADE76350.1 unknown [Picea sitchensis]
TRINITY_DN94824_c2_g5_i1	ACN39857.1	ACN39857.1 unknown [Picea sitchensis]
TRINITY_DN76998_c0_g5_i1	ABR17103.1	ABR17103.1 unknown [Picea sitchensis]
TRINITY_DN70398_c0_g1_i1	ABK24435.1	ABK24435.1 unknown [Picea sitchensis]
TRINITY_DN88817_c0_g1_i1	ABK25758.1	ABK25758.1 unknown [Picea sitchensis]
TRINITY_DN90302_c0_g2_i2	ABK26480.1	ABK26480.1 unknown [Picea sitchensis]
TRINITY_DN66491_c1_g2_i4	ABR18107.1	ABR18107.1 unknown [Picea sitchensis]
TRINITY_DN73495_c1_g2_i3	ABK21920.1	ABK21920.1 unknown [Picea sitchensis]
TRINITY_DN95789_c2_g12_i1	ADE76350.1	ADE76350.1 unknown [Picea sitchensis]
TRINITY_DN86818_c0_g5_i1	ACN39857.1	ACN39857.1 unknown [Picea sitchensis]
TRINITY_DN79342_c1_g5_i2	ABR16429.1	ABR16429.1 unknown [Picea sitchensis]
TRINITY_DN88334_c0_g1_i2	ADE77381.1	ADE77381.1 unknown [Picea sitchensis]
TRINITY_DN91928_c1_g5_i1	ADE77499.1	ADE77499.1 unknown [Picea sitchensis]
TRINITY_DN70315_c0_g1_i2	ABK23767.1	ABK23767.1 unknown [Picea sitchensis]
TRINITY_DN74269_c0_g1_i10	ABK20908.1	ABK20908.1 unknown [Picea sitchensis]
TRINITY_DN78566_c2_g2_i2	ADE76354.1	ADE76354.1 unknown [Picea sitchensis]
TRINITY_DN70433_c0_g1_i3	ADE76470.1	ADE76470.1 unknown [Picea sitchensis]
TRINITY_DN68828_c0_g2_i2	ACN40556.1	ACN40556.1 unknown [Picea sitchensis]
TRINITY_DN77167_c1_g2_i3	ABR16845.1	ABR16845.1 unknown [Picea sitchensis]
TRINITY_DN80887_c0_g2_i1	ABK25847.1	ABK25847.1 unknown [Picea sitchensis]
TRINITY_DN88985_c2_g4_i3	ABK25119.1	ABK25119.1 unknown [Picea sitchensis]
TRINITY_DN81962_c0_g1_i3	ADE77014.1	ADE77014.1 unknown [Picea sitchensis]
TRINITY_DN82378_c0_g4_i2	ABR17068.1	ABR17068.1 unknown [Picea sitchensis]
TRINITY_DN71051_c0_g2_i4	ABK24158.1	ABK24158.1 unknown [Picea sitchensis]
TRINITY_DN71511_c1_g5_i1	ABK25565.1	ABK25565.1 unknown [Picea sitchensis]
TRINITY_DN81156_c5_g5_i1	ADE77734.1	ADE77734.1 unknown [Picea sitchensis]
TRINITY_DN73242_c7_g1_i9	ABK25144.1	ABK25144.1 unknown [Picea sitchensis]
TRINITY_DN90933_c2_g7_i1	ABK26300.1	ABK26300.1 unknown [Picea sitchensis]
TRINITY_DN88507_c1_g1_i5	ABK27038.1	ABK27038.1 unknown [Picea sitchensis]
TRINITY_DN83553_c0_g5_i1	ABK24070.1	ABK24070.1 unknown [Picea sitchensis]
TRINITY_DN71923_c0_g2_i2	ABK25483.1	ABK25483.1 unknown [Picea sitchensis]
TRINITY_DN85748_c1_g1_i4	ADE77360.1	ADE77360.1 unknown [Picea sitchensis]
TRINITY_DN92986_c0_g3_i7	ABK26600.1	ABK26600.1 unknown [Picea sitchensis]
TRINITY_DN82154_c0_g2_i5	ABR17288.1	ABR17288.1 unknown [Picea sitchensis]
TRINITY_DN91743_c1_g7_i1	ABK23612.1	ABK23612.1 unknown [Picea sitchensis]
TRINITY_DN75510_c0_g5_i4	ADE76152.1	ADE76152.1 unknown [Picea sitchensis]
TRINITY_DN70708_c0_g4_i1	ABK21817.1	ABK21817.1 unknown [Picea sitchensis]
TRINITY_DN50025_c0_g1_i1	ABR18096.1	ABR18096.1 unknown [Picea sitchensis]
TRINITY_DN69624_c0_g1_i3	ADE77518.1	ADE77518.1 unknown [Picea sitchensis]
TRINITY_DN89733_c0_g6_i3	ABK22625.1	ABK22625.1 unknown [Picea sitchensis]
TRINITY_DN67835_c0_g1_i1	ACN39829.1	ACN39829.1 unknown [Picea sitchensis]
TRINITY_DN86546_c0_g1_i2	ABR16096.1	ABR16096.1 unknown [Picea sitchensis]
TRINITY_DN62649_c0_g1_i1	ABK22057.1	ABK22057.1 unknown [Picea sitchensis]
TRINITY_DN67467_c0_g1_i2	ABK22890.1	ABK22890.1 unknown [Picea sitchensis]
TRINITY_DN83148_c3_g1_i4	ABK21062.1	ABK21062.1 unknown [Picea sitchensis]
TRINITY_DN68438_c0_g1_i3	ABK21943.1	ABK21943.1 unknown [Picea sitchensis]
TRINITY_DN71113_c0_g1_i2	ADE77379.1	ADE77379.1 unknown [Picea sitchensis]
TRINITY_DN76579_c2_g3_i2	ADE76436.1	ADE76436.1 unknown [Picea sitchensis]
TRINITY_DN73875_c0_g1_i2	ABK23938.1	ABK23938.1 unknown [Picea sitchensis]
TRINITY_DN79602_c0_g1_i2	ABK21764.1	ABK21764.1 unknown [Picea sitchensis]
TRINITY_DN86403_c0_g1_i11	ACN41179.1	ACN41179.1 unknown [Picea sitchensis]
TRINITY_DN70263_c0_g1_i2	ABK24111.1	ABK24111.1 unknown [Picea sitchensis]
TRINITY_DN74269_c0_g3_i1	ABK20902.1	ABK20902.1 unknown [Picea sitchensis]
TRINITY_DN53896_c0_g1_i2	ABK22890.1	ABK22890.1 unknown [Picea sitchensis]
TRINITY_DN83617_c0_g5_i2	ABK22861.1	ABK22861.1 unknown [Picea sitchensis]
TRINITY_DN76823_c0_g4_i2	ABK27017.1	ABK27017.1 unknown [Picea sitchensis]
TRINITY_DN90711_c0_g7_i1	ABR16112.1	ABR16112.1 unknown [Picea sitchensis]
TRINITY_DN69993_c2_g2_i1	ADE75884.1	ADE75884.1 unknown [Picea sitchensis]
TRINITY_DN80351_c5_g7_i1	ADE77665.1	ADE77665.1 unknown [Picea sitchensis]
TRINITY_DN95543_c0_g1_i1	ABK26110.1	ABK26110.1 unknown [Picea sitchensis]
TRINITY_DN90022_c0_g4_i2	ABK23304.1	ABK23304.1 unknown [Picea sitchensis]
TRINITY_DN77845_c3_g2_i2	ACN39861.1	ACN39861.1 unknown [Picea sitchensis]
TRINITY_DN88339_c4_g1_i1	ABK24739.1	ABK24739.1 unknown [Picea sitchensis]
TRINITY_DN97291_c2_g1_i5	ABK21461.1	ABK21461.1 unknown [Picea sitchensis]
TRINITY_DN82104_c0_g3_i2	ABK21015.1	ABK21015.1 unknown [Picea sitchensis]
TRINITY_DN91119_c1_g1_i2	ACN40493.1	ACN40493.1 unknown [Picea sitchensis]
TRINITY_DN81284_c3_g1_i1	ABK22704.1	ABK22704.1 unknown [Picea sitchensis]
TRINITY_DN75268_c1_g3_i1	ADE77784.1	ADE77784.1 unknown [Picea sitchensis]
TRINITY_DN79318_c1_g1_i1	ABR18250.1	ABR18250.1 unknown [Picea sitchensis]
TRINITY_DN77975_c2_g2_i1	ABR17909.1	ABR17909.1 unknown [Picea sitchensis]
TRINITY_DN81591_c0_g2_i7	ACN39939.1	ACN39939.1 unknown [Picea sitchensis]
TRINITY_DN75808_c2_g1_i1	ABK26110.1	ABK26110.1 unknown [Picea sitchensis]
TRINITY_DN94187_c5_g5_i1	ABK24618.1	ABK24618.1 unknown [Picea sitchensis]
TRINITY_DN82417_c1_g1_i4	ADE75977.1	ADE75977.1 unknown [Picea sitchensis]
TRINITY_DN74311_c0_g3_i13	ABK24001.1	ABK24001.1 unknown [Picea sitchensis]
TRINITY_DN82552_c2_g2_i1	ABK22387.1	ABK22387.1 unknown [Picea sitchensis]
TRINITY_DN61566_c0_g1_i1	ABK24690.1	ABK24690.1 unknown [Picea sitchensis]
TRINITY_DN79098_c1_g2_i2	ABK22816.1	ABK22816.1 unknown [Picea sitchensis]
TRINITY_DN72825_c0_g1_i18	ABR18053.1	ABR18053.1 unknown [Picea sitchensis]
TRINITY_DN68250_c0_g3_i1	ABR16045.1	ABR16045.1 unknown [Picea sitchensis]
TRINITY_DN66246_c0_g1_i1	ABR16480.1	ABR16480.1 unknown [Picea sitchensis]
TRINITY_DN68363_c0_g1_i1	ABK22302.1	ABK22302.1 unknown [Picea sitchensis]
TRINITY_DN70269_c0_g2_i2	ABK26561.1	ABK26561.1 unknown [Picea sitchensis]
TRINITY_DN85822_c1_g3_i6	ACN40032.1	ACN40032.1 unknown [Picea sitchensis]
TRINITY_DN90773_c5_g1_i2	ACN39857.1	ACN39857.1 unknown [Picea sitchensis]
TRINITY_DN86267_c2_g4_i2	ABK22302.1	ABK22302.1 unknown [Picea sitchensis]
TRINITY_DN84923_c2_g4_i2	ABR18272.1	ABR18272.1 unknown [Picea sitchensis]
TRINITY_DN11514_c0_g1_i1	ABR18299.1	ABR18299.1 unknown [Picea sitchensis]
TRINITY_DN94386_c3_g2_i8	ABR16286.1	ABR16286.1 unknown [Picea sitchensis]
TRINITY_DN71442_c0_g2_i1	ADE77429.1	ADE77429.1 unknown [Picea sitchensis]
TRINITY_DN86809_c0_g1_i8	ADE76835.1	ADE76835.1 unknown [Picea sitchensis]
TRINITY_DN73410_c0_g2_i6	ABR16028.1	ABR16028.1 unknown [Picea sitchensis]
TRINITY_DN84703_c6_g1_i1	ABR16840.1	ABR16840.1 unknown [Picea sitchensis]
TRINITY_DN62693_c0_g1_i1	ADE77848.1	ADE77848.1 unknown [Picea sitchensis]
TRINITY_DN89755_c2_g3_i1	ABK21023.1	ABK21023.1 unknown [Picea sitchensis]
TRINITY_DN86987_c3_g2_i2	ADE77015.1	ADE77015.1 unknown [Picea sitchensis]
TRINITY_DN72768_c2_g1_i17	ABR17632.1	ABR17632.1 unknown [Picea sitchensis]
TRINITY_DN76718_c2_g4_i1	ABK27116.1	ABK27116.1 unknown [Picea sitchensis]
TRINITY_DN82779_c7_g3_i2	ABK21799.1	ABK21799.1 unknown [Picea sitchensis]
TRINITY_DN91072_c0_g4_i4	ABR17626.1	ABR17626.1 unknown [Picea sitchensis]
TRINITY_DN91900_c4_g1_i3	ADE77256.1	ADE77256.1 unknown [Picea sitchensis]
TRINITY_DN88332_c4_g1_i5	ABK22065.1	ABK22065.1 unknown [Picea sitchensis]
TRINITY_DN73471_c0_g4_i4	ADE75855.1	ADE75855.1 unknown [Picea sitchensis]
TRINITY_DN79663_c1_g5_i1	ABR17632.1	ABR17632.1 unknown [Picea sitchensis]
TRINITY_DN67620_c0_g1_i1	ABK25116.1	ABK25116.1 unknown [Picea sitchensis]
TRINITY_DN75244_c0_g2_i3	ABK24055.1	ABK24055.1 unknown [Picea sitchensis]
TRINITY_DN90194_c1_g2_i2	ABR16629.1	ABR16629.1 unknown [Picea sitchensis]
TRINITY_DN86354_c1_g6_i1	ABK23755.1	ABK23755.1 unknown [Picea sitchensis]
TRINITY_DN90819_c1_g1_i6	ABR16787.1	ABR16787.1 unknown [Picea sitchensis]
TRINITY_DN76897_c0_g9_i1	ABK21078.1	ABK21078.1 unknown [Picea sitchensis]
TRINITY_DN79447_c3_g1_i1	ABR16420.1	ABR16420.1 unknown [Picea sitchensis]
TRINITY_DN96359_c1_g1_i3	ADE77602.1	ADE77602.1 unknown [Picea sitchensis]
TRINITY_DN71297_c0_g4_i1	ABK24819.1	ABK24819.1 unknown [Picea sitchensis]
TRINITY_DN75899_c2_g2_i3	ABR16067.1	ABR16067.1 unknown [Picea sitchensis]
TRINITY_DN80431_c0_g1_i2	ABR16160.1	ABR16160.1 unknown [Picea sitchensis]
TRINITY_DN73888_c0_g2_i3	ABR17942.1	ABR17942.1 unknown [Picea sitchensis]
TRINITY_DN79995_c0_g4_i1	ABK25649.1	ABK25649.1 unknown [Picea sitchensis]
TRINITY_DN89646_c4_g2_i6	ABR18246.1	ABR18246.1 unknown [Picea sitchensis]
TRINITY_DN84916_c1_g1_i1	ADE75665.1	ADE75665.1 unknown [Picea sitchensis]
TRINITY_DN85757_c1_g1_i3	ABR17589.1	ABR17589.1 unknown [Picea sitchensis]
TRINITY_DN75702_c2_g1_i1	ABR18473.1	ABR18473.1 unknown [Picea sitchensis]
TRINITY_DN73707_c0_g1_i1	ABR18209.1	ABR18209.1 unknown [Picea sitchensis]
TRINITY_DN82378_c0_g3_i2	ADE76330.1	ADE76330.1 unknown [Picea sitchensis]
TRINITY_DN95118_c0_g1_i9	ADE76795.1	ADE76795.1 unknown [Picea sitchensis]
TRINITY_DN89301_c0_g1_i1	ABK23358.1	ABK23358.1 unknown [Picea sitchensis]
TRINITY_DN70801_c0_g1_i6	ABR17189.1	ABR17189.1 unknown [Picea sitchensis]
TRINITY_DN72075_c0_g2_i3	ABR16790.1	ABR16790.1 unknown [Picea sitchensis]
TRINITY_DN89679_c2_g2_i1	ABK23938.1	ABK23938.1 unknown [Picea sitchensis]
TRINITY_DN82142_c0_g1_i1	ABK26960.1	ABK26960.1 unknown [Picea sitchensis]
TRINITY_DN71864_c1_g2_i1	ABR17880.1	ABR17880.1 unknown [Picea sitchensis]
TRINITY_DN83281_c0_g1_i3	ABK22530.1	ABK22530.1 unknown [Picea sitchensis]
TRINITY_DN69765_c0_g2_i1	ABR17298.1	ABR17298.1 unknown [Picea sitchensis]
TRINITY_DN77977_c0_g4_i1	ABK26837.1	ABK26837.1 unknown [Picea sitchensis]
TRINITY_DN95516_c1_g1_i1	ABK23340.1	ABK23340.1 unknown [Picea sitchensis]
TRINITY_DN85193_c2_g13_i1	ADE75657.1	ADE75657.1 unknown [Picea sitchensis]
TRINITY_DN95542_c4_g2_i3	ADE77313.1	ADE77313.1 unknown [Picea sitchensis]
TRINITY_DN67144_c0_g1_i1	ADE76519.1	ADE76519.1 unknown [Picea sitchensis]
TRINITY_DN87241_c4_g1_i4	ABK22707.1	ABK22707.1 unknown [Picea sitchensis]
TRINITY_DN75338_c0_g4_i1	ACN40196.1	ACN40196.1 unknown [Picea sitchensis]
TRINITY_DN84921_c1_g1_i2	ADE76978.1	ADE76978.1 unknown [Picea sitchensis]
TRINITY_DN74580_c1_g3_i1	ABK24821.1	ABK24821.1 unknown [Picea sitchensis]
TRINITY_DN81823_c1_g4_i2	ABK26503.1	ABK26503.1 unknown [Picea sitchensis]
TRINITY_DN79663_c1_g1_i3	ABR17632.1	ABR17632.1 unknown [Picea sitchensis]
TRINITY_DN76394_c0_g7_i1	ABR18298.1	ABR18298.1 unknown [Picea sitchensis]
TRINITY_DN92451_c1_g2_i1	ABR16067.1	ABR16067.1 unknown [Picea sitchensis]
TRINITY_DN85644_c2_g1_i1	ABK25066.1	ABK25066.1 unknown [Picea sitchensis]
TRINITY_DN77845_c3_g3_i1	ACN39861.1	ACN39861.1 unknown [Picea sitchensis]
TRINITY_DN88575_c0_g1_i8	ADE77078.1	ADE77078.1 unknown [Picea sitchensis]
TRINITY_DN71091_c0_g1_i1	ABR17489.1	ABR17489.1 unknown [Picea sitchensis]
TRINITY_DN77887_c6_g5_i2	ADE76733.1	ADE76733.1 unknown [Picea sitchensis]
TRINITY_DN84642_c8_g1_i2	ABK25435.1	ABK25435.1 unknown [Picea sitchensis]
TRINITY_DN91081_c2_g2_i1	ABR18410.1	ABR18410.1 unknown [Picea sitchensis]
TRINITY_DN73736_c1_g1_i1	ACN41046.1	ACN41046.1 unknown [Picea sitchensis]
TRINITY_DN91743_c1_g3_i4	ABK23612.1	ABK23612.1 unknown [Picea sitchensis]
TRINITY_DN80411_c1_g4_i2	ACN40032.1	ACN40032.1 unknown [Picea sitchensis]
TRINITY_DN79779_c5_g1_i12	ABK24536.1	ABK24536.1 unknown [Picea sitchensis]
TRINITY_DN90233_c0_g4_i4	ABR16233.1	ABR16233.1 unknown [Picea sitchensis]
TRINITY_DN90912_c1_g8_i1	ABR18451.1	ABR18451.1 unknown [Picea sitchensis]
TRINITY_DN70698_c0_g1_i4	ABK21019.1	ABK21019.1 unknown [Picea sitchensis]
TRINITY_DN85361_c3_g5_i1	ACN40032.1	ACN40032.1 unknown [Picea sitchensis]
TRINITY_DN94515_c2_g10_i1	ABK22387.1	ABK22387.1 unknown [Picea sitchensis]
TRINITY_DN87509_c0_g5_i1	ABK21114.1	ABK21114.1 unknown [Picea sitchensis]
TRINITY_DN86234_c0_g1_i2	ABK23275.1	ABK23275.1 unknown [Picea sitchensis]
TRINITY_DN75732_c1_g1_i6	ABR16678.1	ABR16678.1 unknown [Picea sitchensis]
TRINITY_DN94133_c0_g1_i8	ABK24434.1	ABK24434.1 unknown [Picea sitchensis]
TRINITY_DN64295_c0_g1_i3	ADE76879.1	ADE76879.1 unknown [Picea sitchensis]
TRINITY_DN86199_c4_g1_i1	ACN39857.1	ACN39857.1 unknown [Picea sitchensis]
TRINITY_DN67970_c1_g1_i1	ADE77522.1	ADE77522.1 unknown [Picea sitchensis]
TRINITY_DN84589_c11_g1_i4	ADE76509.1	ADE76509.1 unknown [Picea sitchensis]
TRINITY_DN63938_c0_g1_i1	ABK26902.1	ABK26902.1 unknown [Picea sitchensis]
TRINITY_DN87313_c1_g1_i9	ABR16416.1	ABR16416.1 unknown [Picea sitchensis]
TRINITY_DN83527_c3_g5_i1	ABK22173.1	ABK22173.1 unknown [Picea sitchensis]
TRINITY_DN87562_c1_g1_i6	ABK21321.1	ABK21321.1 unknown [Picea sitchensis]
TRINITY_DN72719_c1_g8_i2	ACN40196.1	ACN40196.1 unknown [Picea sitchensis]
TRINITY_DN84817_c1_g2_i2	ABK26965.1	ABK26965.1 unknown [Picea sitchensis]
TRINITY_DN95453_c3_g1_i1	ABK22890.1	ABK22890.1 unknown [Picea sitchensis]
TRINITY_DN82884_c1_g1_i1	ABK26600.1	ABK26600.1 unknown [Picea sitchensis]
TRINITY_DN13233_c0_g1_i1	ABK26883.1	ABK26883.1 unknown [Picea sitchensis]
TRINITY_DN72382_c1_g3_i2	ABR17273.1	ABR17273.1 unknown [Picea sitchensis]
TRINITY_DN76155_c1_g2_i17	ABR16706.1	ABR16706.1 unknown [Picea sitchensis]
TRINITY_DN85758_c0_g2_i2	ABK25032.1	ABK25032.1 unknown [Picea sitchensis]
TRINITY_DN74664_c3_g1_i2	ABK23120.1	ABK23120.1 unknown [Picea sitchensis]
TRINITY_DN95719_c1_g1_i5	ABK26675.1	ABK26675.1 unknown [Picea sitchensis]
TRINITY_DN91280_c2_g1_i3	ABR18209.1	ABR18209.1 unknown [Picea sitchensis]
TRINITY_DN76656_c1_g5_i2	ABR18195.1	ABR18195.1 unknown [Picea sitchensis]
TRINITY_DN88510_c1_g1_i4	ABR17476.1	ABR17476.1 unknown [Picea sitchensis]
TRINITY_DN88974_c0_g2_i1	ABK22803.1	ABK22803.1 unknown [Picea sitchensis]
TRINITY_DN72881_c2_g1_i6	ABR18056.1	ABR18056.1 unknown [Picea sitchensis]
TRINITY_DN94682_c1_g1_i1	ABR17480.1	ABR17480.1 unknown [Picea sitchensis]
TRINITY_DN95543_c1_g3_i1	ABK26110.1	ABK26110.1 unknown [Picea sitchensis]
TRINITY_DN68282_c0_g1_i1	ABK25126.1	ABK25126.1 unknown [Picea sitchensis]
TRINITY_DN87282_c0_g3_i2	ABK24548.1	ABK24548.1 unknown [Picea sitchensis]
TRINITY_DN83591_c1_g2_i3	ABK24882.1	ABK24882.1 unknown [Picea sitchensis]
TRINITY_DN90630_c1_g2_i2	ADE75918.1	ADE75918.1 unknown [Picea sitchensis]
TRINITY_DN89970_c0_g6_i1	ABK25393.1	ABK25393.1 unknown [Picea sitchensis]
TRINITY_DN51761_c0_g1_i1	ABK25581.1	ABK25581.1 unknown [Picea sitchensis]
TRINITY_DN75727_c2_g2_i4	ABR17892.1	ABR17892.1 unknown [Picea sitchensis]
TRINITY_DN92375_c1_g2_i4	ABK24474.1	ABK24474.1 unknown [Picea sitchensis]
TRINITY_DN89556_c3_g4_i2	ABR17359.1	ABR17359.1 unknown [Picea sitchensis]
TRINITY_DN93681_c0_g2_i2	ABK21799.1	ABK21799.1 unknown [Picea sitchensis]
TRINITY_DN78602_c1_g2_i7	ABR17377.1	ABR17377.1 unknown [Picea sitchensis]
TRINITY_DN82884_c0_g1_i2	ABK26600.1	ABK26600.1 unknown [Picea sitchensis]
TRINITY_DN95789_c0_g1_i4	ADE75855.1	ADE75855.1 unknown [Picea sitchensis]
TRINITY_DN89960_c2_g3_i2	ABK24911.1	ABK24911.1 unknown [Picea sitchensis]
TRINITY_DN73693_c0_g3_i2	ABK24523.1	ABK24523.1 unknown [Picea sitchensis]
TRINITY_DN93074_c0_g3_i10	ADE76940.1	ADE76940.1 unknown [Picea sitchensis]
TRINITY_DN93681_c1_g2_i2	ABK24681.1	ABK24681.1 unknown [Picea sitchensis]
TRINITY_DN87305_c2_g5_i1	ABK24890.1	ABK24890.1 unknown [Picea sitchensis]
TRINITY_DN76832_c2_g3_i1	ABR16438.1	ABR16438.1 unknown [Picea sitchensis]
TRINITY_DN79344_c2_g2_i2	ABK22426.1	ABK22426.1 unknown [Picea sitchensis]
TRINITY_DN72180_c5_g1_i2	ABK22175.1	ABK22175.1 unknown [Picea sitchensis]
TRINITY_DN73594_c1_g1_i2	ABK25765.1	ABK25765.1 unknown [Picea sitchensis]
TRINITY_DN94684_c1_g1_i3	ABR18104.1	ABR18104.1 unknown [Picea sitchensis]
TRINITY_DN87305_c1_g1_i2	ABK21351.1	ABK21351.1 unknown [Picea sitchensis]
TRINITY_DN83517_c6_g9_i1	ABK26521.1	ABK26521.1 unknown [Picea sitchensis]
TRINITY_DN87305_c2_g4_i3	ABK21351.1	ABK21351.1 unknown [Picea sitchensis]
TRINITY_DN72768_c2_g4_i1	ABR17632.1	ABR17632.1 unknown [Picea sitchensis]
TRINITY_DN81443_c1_g2_i6	ABK25003.1	ABK25003.1 unknown [Picea sitchensis]
TRINITY_DN69285_c0_g1_i1	ABR16033.1	ABR16033.1 unknown [Picea sitchensis]
TRINITY_DN81535_c0_g4_i1	ABK21023.1	ABK21023.1 unknown [Picea sitchensis]
TRINITY_DN75981_c0_g1_i2	ADE76530.1	ADE76530.1 unknown [Picea sitchensis]
TRINITY_DN76266_c2_g3_i3	ABK22997.1	ABK22997.1 unknown [Picea sitchensis]
TRINITY_DN75177_c2_g1_i3	ABK24931.1	ABK24931.1 unknown [Picea sitchensis]
TRINITY_DN77372_c0_g1_i11	ACN39861.1	ACN39861.1 unknown [Picea sitchensis]
TRINITY_DN86447_c0_g2_i2	ABK21045.1	ABK21045.1 unknown [Picea sitchensis]
TRINITY_DN85834_c0_g1_i4	ABR18283.1	ABR18283.1 unknown [Picea sitchensis]
TRINITY_DN88468_c0_g1_i4	ABK26102.1	ABK26102.1 unknown [Picea sitchensis]
TRINITY_DN86818_c0_g1_i13	ACN39857.1	ACN39857.1 unknown [Picea sitchensis]
TRINITY_DN48333_c0_g1_i2	ADE76795.1	ADE76795.1 unknown [Picea sitchensis]
TRINITY_DN95781_c1_g4_i3	ABK24621.1	ABK24621.1 unknown [Picea sitchensis]
TRINITY_DN85927_c0_g2_i1	ABK23698.1	ABK23698.1 unknown [Picea sitchensis]
TRINITY_DN74000_c1_g1_i2	ACN40174.1	ACN40174.1 unknown [Picea sitchensis]
TRINITY_DN88727_c3_g1_i2	ABR18194.1	ABR18194.1 unknown [Picea sitchensis]
TRINITY_DN84538_c0_g2_i5	ABK23494.1	ABK23494.1 unknown [Picea sitchensis]
TRINITY_DN90873_c0_g4_i2	ABR17839.1	ABR17839.1 unknown [Picea sitchensis]
TRINITY_DN92269_c1_g1_i5	ABK24596.1	ABK24596.1 unknown [Picea sitchensis]
TRINITY_DN89966_c3_g2_i2	ABK21937.1	ABK21937.1 unknown [Picea sitchensis]
TRINITY_DN94609_c0_g1_i7	ABK27093.1	ABK27093.1 unknown [Picea sitchensis]
TRINITY_DN92120_c1_g2_i1	ABK21509.1	ABK21509.1 unknown [Picea sitchensis]
TRINITY_DN88575_c0_g6_i3	ADE77078.1	ADE77078.1 unknown [Picea sitchensis]
TRINITY_DN76854_c1_g1_i1	ABR16273.1	ABR16273.1 unknown [Picea sitchensis]
TRINITY_DN76155_c1_g4_i2	ABR16706.1	ABR16706.1 unknown [Picea sitchensis]
TRINITY_DN64435_c0_g1_i1	ABK25611.1	ABK25611.1 unknown [Picea sitchensis]
TRINITY_DN94522_c0_g1_i1	ACN39880.1	ACN39880.1 unknown [Picea sitchensis]
TRINITY_DN83127_c0_g3_i2	ABR17027.1	ABR17027.1 unknown [Picea sitchensis]
TRINITY_DN88823_c0_g3_i1	ABR16049.1	ABR16049.1 unknown [Picea sitchensis]
TRINITY_DN73326_c0_g1_i1	ABK21149.1	ABK21149.1 unknown [Picea sitchensis]
TRINITY_DN76848_c1_g1_i1	ABK23594.1	ABK23594.1 unknown [Picea sitchensis]
TRINITY_DN82128_c1_g2_i2	ABR16049.1	ABR16049.1 unknown [Picea sitchensis]
TRINITY_DN70721_c0_g9_i2	ABK23184.1	ABK23184.1 unknown [Picea sitchensis]
TRINITY_DN86453_c2_g6_i4	ABK22077.1	ABK22077.1 unknown [Picea sitchensis]
TRINITY_DN87305_c2_g1_i1	ABK24890.1	ABK24890.1 unknown [Picea sitchensis]
TRINITY_DN89649_c2_g1_i1	ADE77602.1	ADE77602.1 unknown [Picea sitchensis]
TRINITY_DN95741_c1_g5_i1	ADE77007.1	ADE77007.1 unknown [Picea sitchensis]
TRINITY_DN78182_c2_g3_i2	ABK24524.1	ABK24524.1 unknown [Picea sitchensis]
TRINITY_DN86907_c2_g1_i8	ABK24455.1	ABK24455.1 unknown [Picea sitchensis]
TRINITY_DN84205_c4_g6_i1	ADE75657.1	ADE75657.1 unknown [Picea sitchensis]
TRINITY_DN75127_c1_g1_i4	ABK25100.1	ABK25100.1 unknown [Picea sitchensis]
TRINITY_DN68917_c0_g1_i1	ABK20971.1	ABK20971.1 unknown [Picea sitchensis]
TRINITY_DN95499_c2_g1_i1	ABR16429.1	ABR16429.1 unknown [Picea sitchensis]
TRINITY_DN75177_c2_g3_i2	ABK24931.1	ABK24931.1 unknown [Picea sitchensis]
TRINITY_DN81746_c6_g2_i2	ABK21811.1	ABK21811.1 unknown [Picea sitchensis]
TRINITY_DN73358_c0_g2_i1	ABK21245.1	ABK21245.1 unknown [Picea sitchensis]
TRINITY_DN75424_c0_g1_i3	ABK23457.1	ABK23457.1 unknown [Picea sitchensis]
TRINITY_DN83553_c0_g7_i1	ABK24070.1	ABK24070.1 unknown [Picea sitchensis]
TRINITY_DN79180_c4_g2_i1	ADE75798.1	ADE75798.1 unknown [Picea sitchensis]
TRINITY_DN86579_c1_g3_i1	ABK24743.1	ABK24743.1 unknown [Picea sitchensis]
TRINITY_DN88006_c0_g4_i1	ABK25066.1	ABK25066.1 unknown [Picea sitchensis]
TRINITY_DN82552_c2_g1_i1	ABK22387.1	ABK22387.1 unknown [Picea sitchensis]
TRINITY_DN96244_c10_g6_i1	ABR16526.1	ABR16526.1 unknown [Picea sitchensis]
TRINITY_DN72134_c1_g1_i3	ACN39902.1	ACN39902.1 unknown [Picea sitchensis]
TRINITY_DN74764_c2_g1_i1	ABK22236.1	ABK22236.1 unknown [Picea sitchensis]
TRINITY_DN92120_c1_g1_i16	ABK21509.1	ABK21509.1 unknown [Picea sitchensis]
TRINITY_DN85927_c0_g1_i4	ABK23698.1	ABK23698.1 unknown [Picea sitchensis]
TRINITY_DN83399_c1_g9_i2	ADE76840.1	ADE76840.1 unknown [Picea sitchensis]
TRINITY_DN73888_c0_g3_i2	ABR17252.1	ABR17252.1 unknown [Picea sitchensis]
TRINITY_DN91953_c5_g3_i2	ABK22039.1	ABK22039.1 unknown [Picea sitchensis]
TRINITY_DN96325_c0_g2_i1	ACN39861.1	ACN39861.1 unknown [Picea sitchensis]
TRINITY_DN85134_c0_g1_i4	ACN40341.1	ACN40341.1 unknown [Picea sitchensis]
TRINITY_DN89926_c0_g5_i2	ABR16997.1	ABR16997.1 unknown [Picea sitchensis]
TRINITY_DN73888_c0_g1_i4	ABR17942.1	ABR17942.1 unknown [Picea sitchensis]
TRINITY_DN74732_c1_g2_i2	ABR16959.1	ABR16959.1 unknown [Picea sitchensis]
TRINITY_DN66836_c0_g1_i5	ABK23117.1	ABK23117.1 unknown [Picea sitchensis]
TRINITY_DN88607_c1_g1_i1	ABR18056.1	ABR18056.1 unknown [Picea sitchensis]
TRINITY_DN88329_c1_g6_i1	ABR16160.1	ABR16160.1 unknown [Picea sitchensis]
TRINITY_DN69786_c0_g1_i1	ABK24874.1	ABK24874.1 unknown [Picea sitchensis]
TRINITY_DN69237_c0_g1_i1	ADE77004.1	ADE77004.1 unknown [Picea sitchensis]
TRINITY_DN77590_c0_g5_i1	ABK25177.1	ABK25177.1 unknown [Picea sitchensis]
TRINITY_DN73481_c7_g1_i1	ABK24523.1	ABK24523.1 unknown [Picea sitchensis]
TRINITY_DN79040_c2_g6_i1	ABK25661.1	ABK25661.1 unknown [Picea sitchensis]
TRINITY_DN91415_c0_g2_i7	ABR18473.1	ABR18473.1 unknown [Picea sitchensis]
TRINITY_DN81412_c2_g6_i1	ABR18194.1	ABR18194.1 unknown [Picea sitchensis]
TRINITY_DN81327_c0_g2_i2	ABK22244.1	ABK22244.1 unknown [Picea sitchensis]
TRINITY_DN76839_c1_g1_i1	ADE77271.1	ADE77271.1 unknown [Picea sitchensis]
TRINITY_DN77100_c0_g2_i5	ADE77579.1	ADE77579.1 unknown [Picea sitchensis]
TRINITY_DN91328_c1_g1_i1	ABK27125.1	ABK27125.1 unknown [Picea sitchensis]
TRINITY_DN80264_c6_g6_i2	ADE77602.1	ADE77602.1 unknown [Picea sitchensis]
TRINITY_DN72931_c0_g2_i2	ABR16528.1	ABR16528.1 unknown [Picea sitchensis]
TRINITY_DN76379_c3_g1_i1	ABR17838.1	ABR17838.1 unknown [Picea sitchensis]
TRINITY_DN80023_c3_g1_i2	ABK22759.1	ABK22759.1 unknown [Picea sitchensis]
TRINITY_DN71413_c0_g1_i1	ABK23919.1	ABK23919.1 unknown [Picea sitchensis]
TRINITY_DN87213_c3_g2_i1	ABK26674.1	ABK26674.1 unknown [Picea sitchensis]
TRINITY_DN80171_c3_g1_i3	ACN40370.1	ACN40370.1 unknown [Picea sitchensis]
TRINITY_DN79720_c1_g2_i1	ABK21023.1	ABK21023.1 unknown [Picea sitchensis]
TRINITY_DN95169_c0_g1_i2	ACN41071.1	ACN41071.1 unknown [Picea sitchensis]
TRINITY_DN73145_c0_g7_i2	ABK23399.1	ABK23399.1 unknown [Picea sitchensis]
TRINITY_DN86334_c2_g3_i1	ABR18253.1	ABR18253.1 unknown [Picea sitchensis]
TRINITY_DN72839_c1_g5_i2	ABK26200.1	ABK26200.1 unknown [Picea sitchensis]
TRINITY_DN94260_c1_g1_i6	ABR17846.1	ABR17846.1 unknown [Picea sitchensis]
TRINITY_DN76190_c0_g4_i3	ABK22915.1	ABK22915.1 unknown [Picea sitchensis]
TRINITY_DN67891_c0_g1_i1	ABK24153.1	ABK24153.1 unknown [Picea sitchensis]
TRINITY_DN78546_c5_g3_i2	ACN40196.1	ACN40196.1 unknown [Picea sitchensis]
TRINITY_DN81949_c0_g2_i3	ADE76730.1	ADE76730.1 unknown [Picea sitchensis]
TRINITY_DN68276_c0_g2_i4	ADE77593.1	ADE77593.1 unknown [Picea sitchensis]
TRINITY_DN95722_c16_g2_i1	ABK21351.1	ABK21351.1 unknown [Picea sitchensis]
TRINITY_DN74732_c1_g9_i1	ABK25754.1	ABK25754.1 unknown [Picea sitchensis]
TRINITY_DN177889_c0_g1_i1	ABR17632.1	ABR17632.1 unknown [Picea sitchensis]
TRINITY_DN67275_c0_g3_i2	ABK23395.1	ABK23395.1 unknown [Picea sitchensis]
TRINITY_DN90302_c0_g1_i5	ABK26480.1	ABK26480.1 unknown [Picea sitchensis]
TRINITY_DN89202_c1_g5_i1	ACN40311.1	ACN40311.1 unknown [Picea sitchensis]
TRINITY_DN67334_c0_g3_i3	ABR16866.1	ABR16866.1 unknown [Picea sitchensis]
TRINITY_DN72864_c2_g1_i6	ABR17468.1	ABR17468.1 unknown [Picea sitchensis]
TRINITY_DN67136_c0_g1_i1	ABK23604.1	ABK23604.1 unknown [Picea sitchensis]
TRINITY_DN97399_c0_g1_i8	ACN40875.1	ACN40875.1 unknown [Picea sitchensis]
TRINITY_DN87807_c2_g6_i3	ABK24373.1	ABK24373.1 unknown [Picea sitchensis]
TRINITY_DN72144_c3_g1_i1	ABR16711.1	ABR16711.1 unknown [Picea sitchensis]
TRINITY_DN1280_c0_g1_i1	ABK22709.1	ABK22709.1 unknown [Picea sitchensis]
TRINITY_DN74279_c0_g2_i4	ABK24537.1	ABK24537.1 unknown [Picea sitchensis]
TRINITY_DN78583_c0_g2_i2	ABK24007.1	ABK24007.1 unknown [Picea sitchensis]
TRINITY_DN68757_c0_g1_i1	ABK25403.1	ABK25403.1 unknown [Picea sitchensis]
TRINITY_DN92278_c2_g1_i1	ABR16533.1	ABR16533.1 unknown [Picea sitchensis]
TRINITY_DN89309_c1_g1_i3	ABR16067.1	ABR16067.1 unknown [Picea sitchensis]
TRINITY_DN96087_c1_g4_i7	ACN39861.1	ACN39861.1 unknown [Picea sitchensis]
TRINITY_DN80256_c0_g6_i2	ACN39827.1	ACN39827.1 unknown [Picea sitchensis]
TRINITY_DN87794_c1_g4_i1	ABK24480.1	ABK24480.1 unknown [Picea sitchensis]
TRINITY_DN79942_c0_g5_i1	ABR16271.1	ABR16271.1 unknown [Picea sitchensis]
TRINITY_DN92296_c2_g1_i5	ADE76436.1	ADE76436.1 unknown [Picea sitchensis]
TRINITY_DN92272_c4_g1_i7	ABR16606.1	ABR16606.1 unknown [Picea sitchensis]
TRINITY_DN88117_c0_g1_i1	ADE76674.1	ADE76674.1 unknown [Picea sitchensis]
TRINITY_DN85657_c0_g7_i3	ABK22147.1	ABK22147.1 unknown [Picea sitchensis]
TRINITY_DN79091_c4_g1_i2	ABR18473.1	ABR18473.1 unknown [Picea sitchensis]
TRINITY_DN89888_c0_g1_i2	ACN40981.1	ACN40981.1 unknown [Picea sitchensis]
TRINITY_DN92040_c0_g1_i11	ABK26547.1	ABK26547.1 unknown [Picea sitchensis]
TRINITY_DN82530_c2_g2_i2	ABK25921.1	ABK25921.1 unknown [Picea sitchensis]
TRINITY_DN86161_c0_g2_i2	ABK24034.1	ABK24034.1 unknown [Picea sitchensis]
TRINITY_DN65799_c0_g1_i3	ABR16370.1	ABR16370.1 unknown [Picea sitchensis]
TRINITY_DN91602_c1_g2_i4	ABR18365.1	ABR18365.1 unknown [Picea sitchensis]
TRINITY_DN81513_c2_g1_i1	ADE77032.1	ADE77032.1 unknown [Picea sitchensis]
TRINITY_DN72010_c2_g1_i1	ABK24537.1	ABK24537.1 unknown [Picea sitchensis]
TRINITY_DN85303_c7_g1_i4	ABK22117.1	ABK22117.1 unknown [Picea sitchensis]
TRINITY_DN77590_c0_g8_i1	ABK21072.1	ABK21072.1 unknown [Picea sitchensis]
TRINITY_DN96085_c2_g3_i1	ABR16884.1	ABR16884.1 unknown [Picea sitchensis]
TRINITY_DN82427_c0_g1_i3	ABR17252.1	ABR17252.1 unknown [Picea sitchensis]
TRINITY_DN82126_c0_g2_i4	ABK23285.1	ABK23285.1 unknown [Picea sitchensis]
TRINITY_DN95169_c2_g4_i1	ACN41071.1	ACN41071.1 unknown [Picea sitchensis]
TRINITY_DN77500_c3_g6_i1	ABK25460.1	ABK25460.1 unknown [Picea sitchensis]
TRINITY_DN77560_c0_g1_i6	ABK23213.1	ABK23213.1 unknown [Picea sitchensis]
TRINITY_DN81694_c3_g1_i3	ABK24911.1	ABK24911.1 unknown [Picea sitchensis]
TRINITY_DN68503_c0_g1_i1	ABK21407.1	ABK21407.1 unknown [Picea sitchensis]
TRINITY_DN92780_c2_g1_i2	ADE77534.1	ADE77534.1 unknown [Picea sitchensis]
TRINITY_DN93111_c0_g2_i2	ABK24721.1	ABK24721.1 unknown [Picea sitchensis]
TRINITY_DN74802_c4_g3_i1	ADE76881.1	ADE76881.1 unknown [Picea sitchensis]
TRINITY_DN93786_c0_g2_i1	ABK25009.1	ABK25009.1 unknown [Picea sitchensis]
TRINITY_DN82498_c0_g2_i4	ADE77340.1	ADE77340.1 unknown [Picea sitchensis]
TRINITY_DN81036_c1_g1_i4	ABK22749.1	ABK22749.1 unknown [Picea sitchensis]
TRINITY_DN85134_c0_g7_i2	ACN40341.1	ACN40341.1 unknown [Picea sitchensis]
TRINITY_DN66324_c1_g1_i1	ABR17880.1	ABR17880.1 unknown [Picea sitchensis]
TRINITY_DN90106_c3_g3_i1	ADE76810.1	ADE76810.1 unknown [Picea sitchensis]
TRINITY_DN95077_c0_g1_i1	ABR18473.1	ABR18473.1 unknown [Picea sitchensis]
TRINITY_DN66762_c0_g1_i2	ABK23955.1	ABK23955.1 unknown [Picea sitchensis]
TRINITY_DN81835_c2_g1_i3	ABR16929.1	ABR16929.1 unknown [Picea sitchensis]
TRINITY_DN94823_c2_g1_i24	ADE77231.1	ADE77231.1 unknown [Picea sitchensis]
TRINITY_DN58158_c0_g1_i1	ABK23427.1	ABK23427.1 unknown [Picea sitchensis]
TRINITY_DN41467_c1_g1_i1	ABK25480.1	ABK25480.1 unknown [Picea sitchensis]
TRINITY_DN85132_c3_g1_i3	ABK27038.1	ABK27038.1 unknown [Picea sitchensis]
TRINITY_DN95591_c1_g6_i1	ADE75682.1	ADE75682.1 unknown [Picea sitchensis]
TRINITY_DN70380_c0_g5_i1	ABR17052.1	ABR17052.1 unknown [Picea sitchensis]
TRINITY_DN80213_c2_g2_i1	ADE77244.1	ADE77244.1 unknown [Picea sitchensis]
TRINITY_DN85529_c3_g3_i1	ABR16606.1	ABR16606.1 unknown [Picea sitchensis]
TRINITY_DN92981_c0_g1_i5	ABR17476.1	ABR17476.1 unknown [Picea sitchensis]
TRINITY_DN80542_c9_g4_i1	ABR17027.1	ABR17027.1 unknown [Picea sitchensis]
TRINITY_DN91387_c2_g4_i1	ADE75957.1	ADE75957.1 unknown [Picea sitchensis]
TRINITY_DN84081_c2_g6_i1	ABR18400.1	ABR18400.1 unknown [Picea sitchensis]
TRINITY_DN91733_c0_g4_i1	ADE75633.1	ADE75633.1 unknown [Picea sitchensis]
TRINITY_DN72626_c0_g1_i4	ADE76899.1	ADE76899.1 unknown [Picea sitchensis]
TRINITY_DN93983_c2_g1_i11	ABK22753.1	ABK22753.1 unknown [Picea sitchensis]
TRINITY_DN47199_c0_g1_i1	ABR16821.1	ABR16821.1 unknown [Picea sitchensis]
TRINITY_DN58856_c0_g1_i1	ABK23059.1	ABK23059.1 unknown [Picea sitchensis]
TRINITY_DN76611_c3_g5_i2	ABK25657.1	ABK25657.1 unknown [Picea sitchensis]
TRINITY_DN73997_c0_g4_i2	ADE77086.1	ADE77086.1 unknown [Picea sitchensis]
TRINITY_DN89753_c1_g1_i6	ADE76372.1	ADE76372.1 unknown [Picea sitchensis]
TRINITY_DN79987_c0_g1_i1	ACN40244.1	ACN40244.1 unknown [Picea sitchensis]
TRINITY_DN91984_c3_g2_i1	ACN40984.1	ACN40984.1 unknown [Picea sitchensis]
TRINITY_DN75370_c1_g1_i2	ABK26533.1	ABK26533.1 unknown [Picea sitchensis]
TRINITY_DN82427_c0_g2_i8	ACN41009.1	ACN41009.1 unknown [Picea sitchensis]
TRINITY_DN92759_c2_g2_i3	ABK24493.1	ABK24493.1 unknown [Picea sitchensis]
TRINITY_DN90234_c0_g6_i1	ABR18022.1	ABR18022.1 unknown [Picea sitchensis]
TRINITY_DN96958_c0_g2_i1	ABR17786.1	ABR17786.1 unknown [Picea sitchensis]
TRINITY_DN70357_c0_g1_i2	ABK23554.1	ABK23554.1 unknown [Picea sitchensis]
TRINITY_DN79243_c1_g4_i2	ABK25458.1	ABK25458.1 unknown [Picea sitchensis]
TRINITY_DN84310_c3_g1_i3	ABR16806.1	ABR16806.1 unknown [Picea sitchensis]
TRINITY_DN73326_c0_g3_i3	ABK26902.1	ABK26902.1 unknown [Picea sitchensis]
TRINITY_DN85394_c1_g3_i9	ADE76436.1	ADE76436.1 unknown [Picea sitchensis]
TRINITY_DN82417_c1_g5_i3	ADE75977.1	ADE75977.1 unknown [Picea sitchensis]
TRINITY_DN95552_c2_g1_i5	ABK22356.1	ABK22356.1 unknown [Picea sitchensis]
TRINITY_DN64857_c0_g1_i1	ABK23627.1	ABK23627.1 unknown [Picea sitchensis]
TRINITY_DN76018_c2_g2_i2	ABK27006.1	ABK27006.1 unknown [Picea sitchensis]
TRINITY_DN83643_c4_g4_i4	ABR17476.1	ABR17476.1 unknown [Picea sitchensis]
TRINITY_DN77432_c1_g1_i2	ABK23232.1	ABK23232.1 unknown [Picea sitchensis]
TRINITY_DN90450_c2_g2_i5	ADE76020.1	ADE76020.1 unknown [Picea sitchensis]
TRINITY_DN77139_c0_g2_i1	ABK21374.1	ABK21374.1 unknown [Picea sitchensis]
TRINITY_DN90403_c0_g3_i3	ABK24426.1	ABK24426.1 unknown [Picea sitchensis]
TRINITY_DN90007_c0_g4_i3	ACN40174.1	ACN40174.1 unknown [Picea sitchensis]
TRINITY_DN83697_c3_g2_i3	ABK25435.1	ABK25435.1 unknown [Picea sitchensis]
TRINITY_DN69795_c0_g1_i4	ADE75703.1	ADE75703.1 unknown [Picea sitchensis]
TRINITY_DN94684_c0_g3_i1	ABR18104.1	ABR18104.1 unknown [Picea sitchensis]
TRINITY_DN91863_c1_g3_i1	ABK25460.1	ABK25460.1 unknown [Picea sitchensis]
TRINITY_DN71941_c0_g1_i3	ADE76517.1	ADE76517.1 unknown [Picea sitchensis]
TRINITY_DN91086_c1_g1_i2	ADE76148.1	ADE76148.1 unknown [Picea sitchensis]
TRINITY_DN88727_c2_g1_i1	ABR18194.1	ABR18194.1 unknown [Picea sitchensis]
